# Supplementary material for: Arenium cation or radical cation? An insight into the cyclodehydrogenation reaction of 2-substituted binaphthyls mediated by Lewis acids
Source: Royal Society of Chemistry journal article supplement (doi:10.1039/d0ra04213g), 2020-01-01
Supplement: d0ra04213g1.pdf [file d0ra04213g1.pdf]

# **Arenium cation or radical cation? An insight on the cyclodehydrogenation reaction of 2-substituted binaphthyls**

*Patricia Camargo Solórzano, María T. Baumgartner, Marcelo Puiatti\* and Liliana B. Jimenez\**

INFIQC, Departamento de Química Orgánica, Facultad de Ciencias Químicas, Universidad Nacional de Córdoba, Ciudad Universitaria, X5000HUA,  
Córdoba, Argentina.

**SUPPLEMENTARY INFORMATION**

## INDEX

|     |                                                                                                                                                                                                                                              |         |
|-----|----------------------------------------------------------------------------------------------------------------------------------------------------------------------------------------------------------------------------------------------|---------|
| 1.  | <b>Synthesis procedure for <i>N,N</i>-dimethyl-[1,1'-binaphthalen]-2-amine (2).</b>                                                                                                                                                          | SI -3-  |
| 2.  | <b>Spectroscopic data.</b>                                                                                                                                                                                                                   |         |
| 2.1 | <sup>1</sup> H-NMR spectrum of [1,1'-binaphthalen] -2-amine (1)                                                                                                                                                                              | SI -4-  |
| 2.2 | <sup>1</sup> H- and <sup>13</sup> C-NMR spectra of <i>N,N</i> -dimethyl-[1,1'-binaphthalen]-2-amine (2)                                                                                                                                      | SI -5-  |
| 2.3 | <sup>1</sup> H-NMR spectrum of 2-methoxy-1,1'-binaphthalene (3)                                                                                                                                                                              | SI -7-  |
| 2.4 | <sup>1</sup> H- and 2D NMR spectra of perylene-1-amine (4).                                                                                                                                                                                  | SI -8-  |
| 2.5 | <sup>1</sup> H-, <sup>13</sup> C- and 2D NMR spectra of <i>N,N</i> -dimethylperylene-1-amine (5)                                                                                                                                             | SI -12- |
| 2.6 | <sup>1</sup> H- and <sup>13</sup> C-NMR spectra of perylene (7).                                                                                                                                                                             | SI -18- |
| 2.7 | <sup>1</sup> H-NMR spectrum of 1,1': 4',1''- ternaphthalene (25)                                                                                                                                                                             | SI -20- |
| 2.8 | UV-Visible spectra of terylene (26).                                                                                                                                                                                                         | SI -21- |
| 3.  | <b>Boltzman population analysis for the formation of the <math>\sigma</math>-complex for 1a, 8a, 9a, 3, and 25 at 170 °C.</b>                                                                                                                | SI -22- |
| 4.  | <b>Representation of the electrostatic potential of 3<math>\sigma</math>.</b>                                                                                                                                                                | SI -25- |
| 5.  | <b><math>\Delta G_r</math> and <math>\Delta G^\ddagger</math> for the ring closure by Scholl reaction of the complexes 1<math>\sigma</math>, 2<math>\sigma</math>, 8<math>\sigma</math>, 9<math>\sigma</math> and 25<math>\sigma</math>.</b> | SI -26- |
| 6.  | <b>Description of the procedure employed for the calculation of Redox Potential.</b>                                                                                                                                                         | SI -27- |
| 7.  | <b>Compounds used as references in the theoretical study of aromatic oxidative coupling mechanism.</b>                                                                                                                                       | SI -28- |
| 8.  | <b>Formation of Terylene: study of Scholl reaction.</b>                                                                                                                                                                                      |         |
| 8.1 | Calculated energies for the first cyclization step from isomers $\sigma_4$ and $\sigma_5$ of protonated 25.                                                                                                                                  | SI -29- |
| 8.2 | Calculated energies involved in both ring closures of 25 $\sigma$ by the Scholl mechanism, $\sigma$ -complex generated in position 5.                                                                                                        | SI -30- |
| 9.  | <b>Electrostatic potential isosurface of 25<math>\sigma</math> and the intermediary product of cyclization to afford terylene.</b>                                                                                                           | SI-31-  |
| 10. | <b>XYZ Coordinates of the computed compounds.</b>                                                                                                                                                                                            | SI-32-  |

**1. Synthesis of *N,N*-dimethyl-[1,1'-binaphthalen]-2-amine (2).**

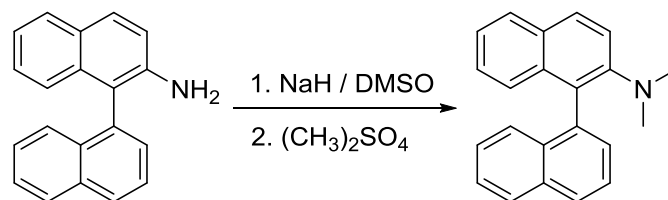

100 mg (1 eq., 0.37 mmol) de [1,1'-binaphthalen]-2-amine (1) was dissolved with DMSO (5 mL) in 50 mL round bottom flask at room temperature. After stirring 10 minutes, NaH was added (10 eq., 89 mg) and the reaction mixture was left stirring for 30 minutes. After this, (CH<sub>3</sub>)<sub>2</sub>SO<sub>4</sub> (10 eq, 3.7 mmol, 0.350 mL) was added slowly over a period of 30 minutes, and finally stirring overnight. Worked up by adding carefully water (10 mL). Extracted the aqueous portion 3 times with ethyl acetate. The ethyl acetate layers were combined and rinsed 3 times with water (10 mL). The ethyl acetate layer was then dried over Na<sub>2</sub>SO<sub>4</sub> and then, the solvent was evaporated under reduced pressure. The solid was purified over silica gel in 1:1 hexanes/ethyl acetate. The product was obtained as pale yellow solid, 47% yield (0.17 mmol, 52 mg). Spectroscopic characterization is described in experimental section in main article.

## 2. Spectroscopic data

### 2.1 - [1,1'-Binaphthalen]-2-amine (1). $^1\text{H-NMR}$ (400 MHz, acetone- $d_6$ )

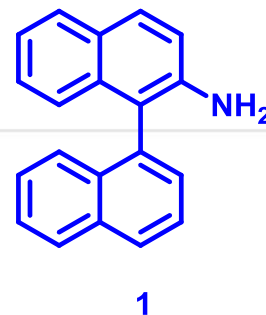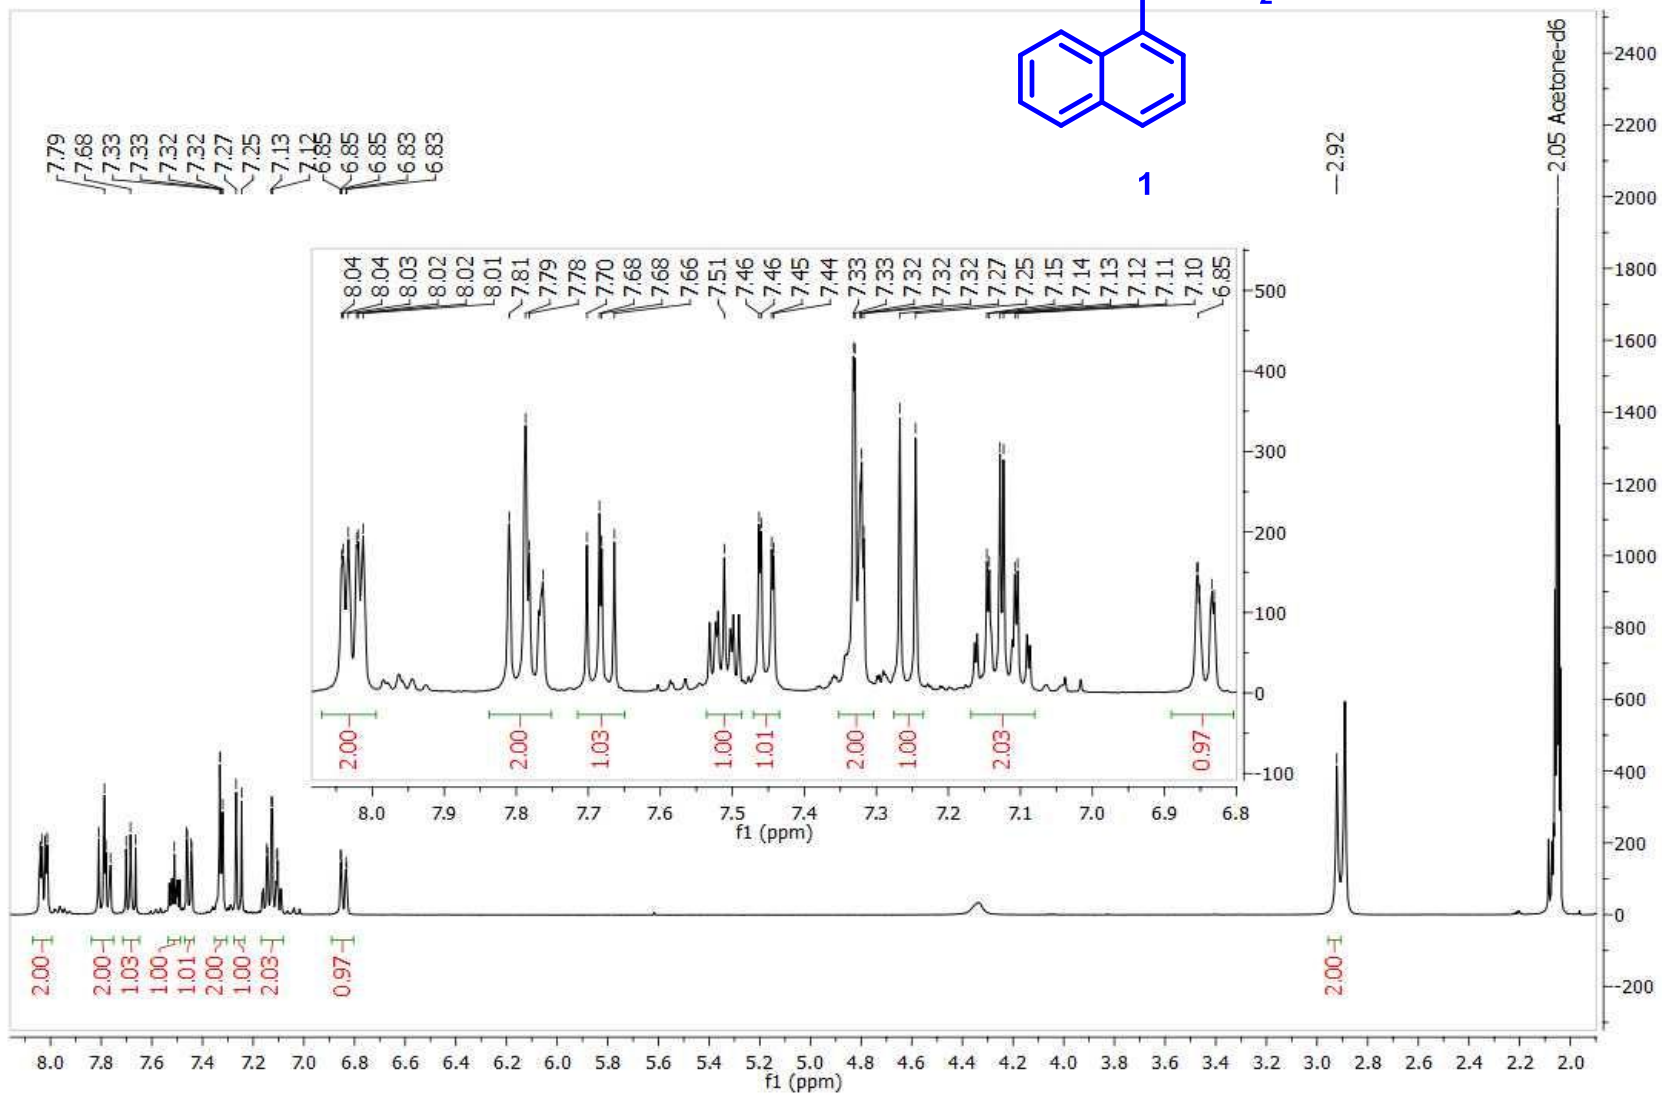

2.2 - *N,N*-dimethyl-[1,1'-binaphthalen]-2-amine (2)

<sup>1</sup>H-NMR (400 MHz, chloroform-*d*<sub>1</sub>)
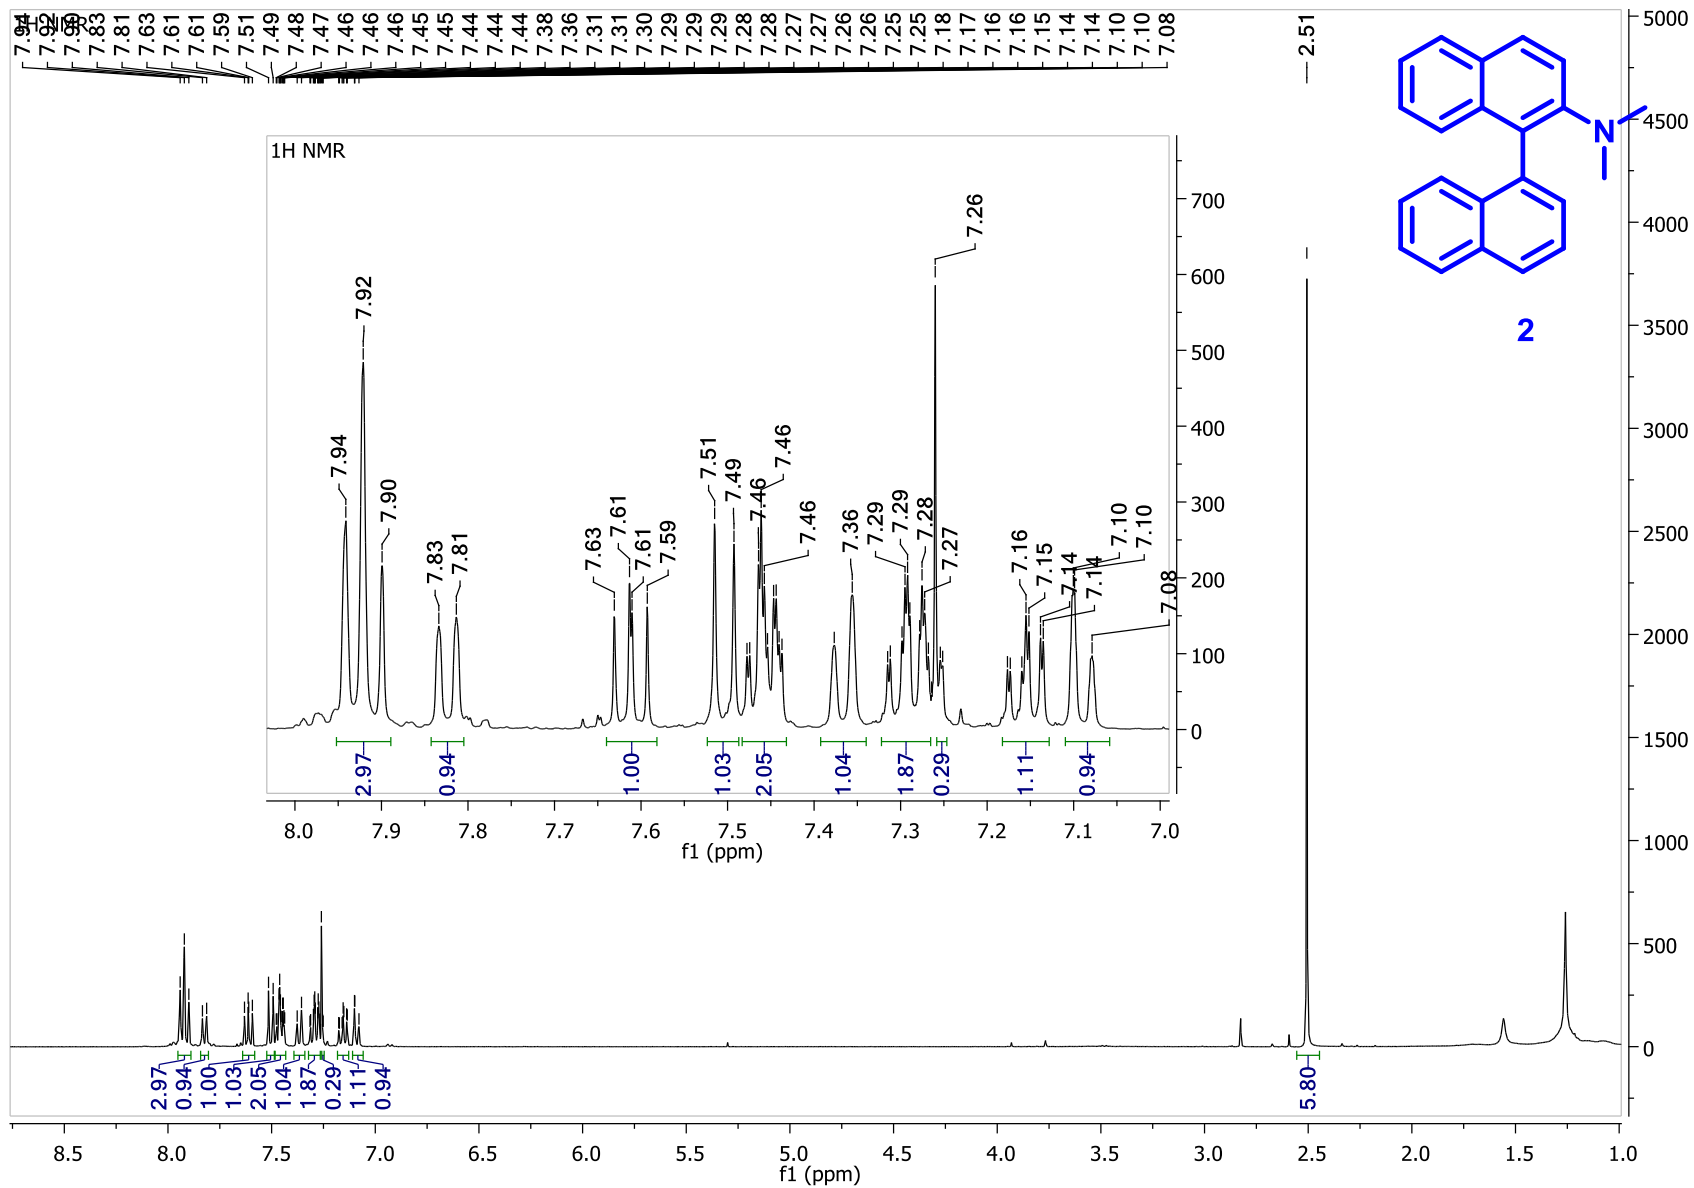

$^{13}\text{C}$ -NMR (100 MHz, chloroform- $d_1$ )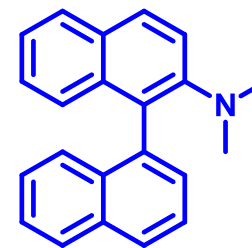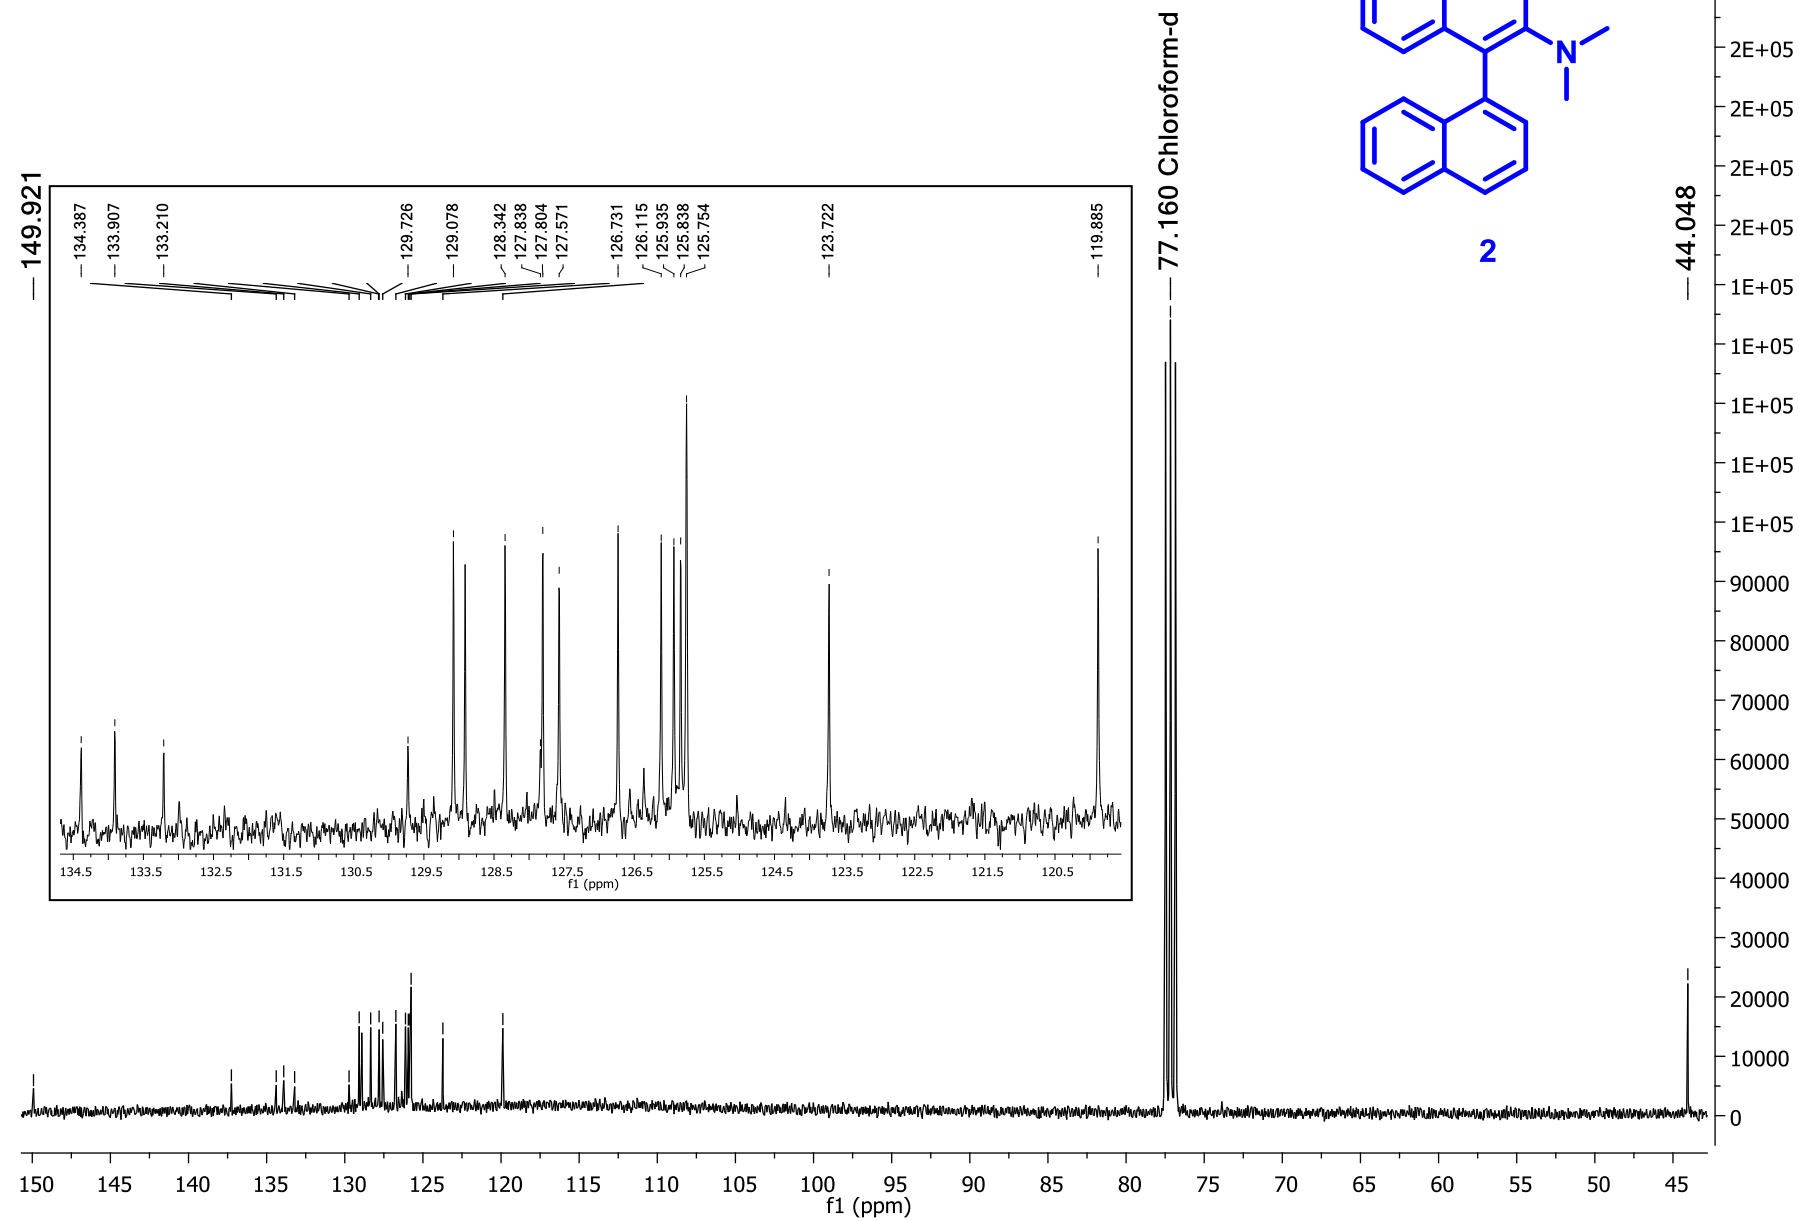

2.3 – 2-Methoxy-1,1'-binaphthalene (3)  
<sup>1</sup>H-NMR (400 MHz, acetone-d<sub>6</sub>)

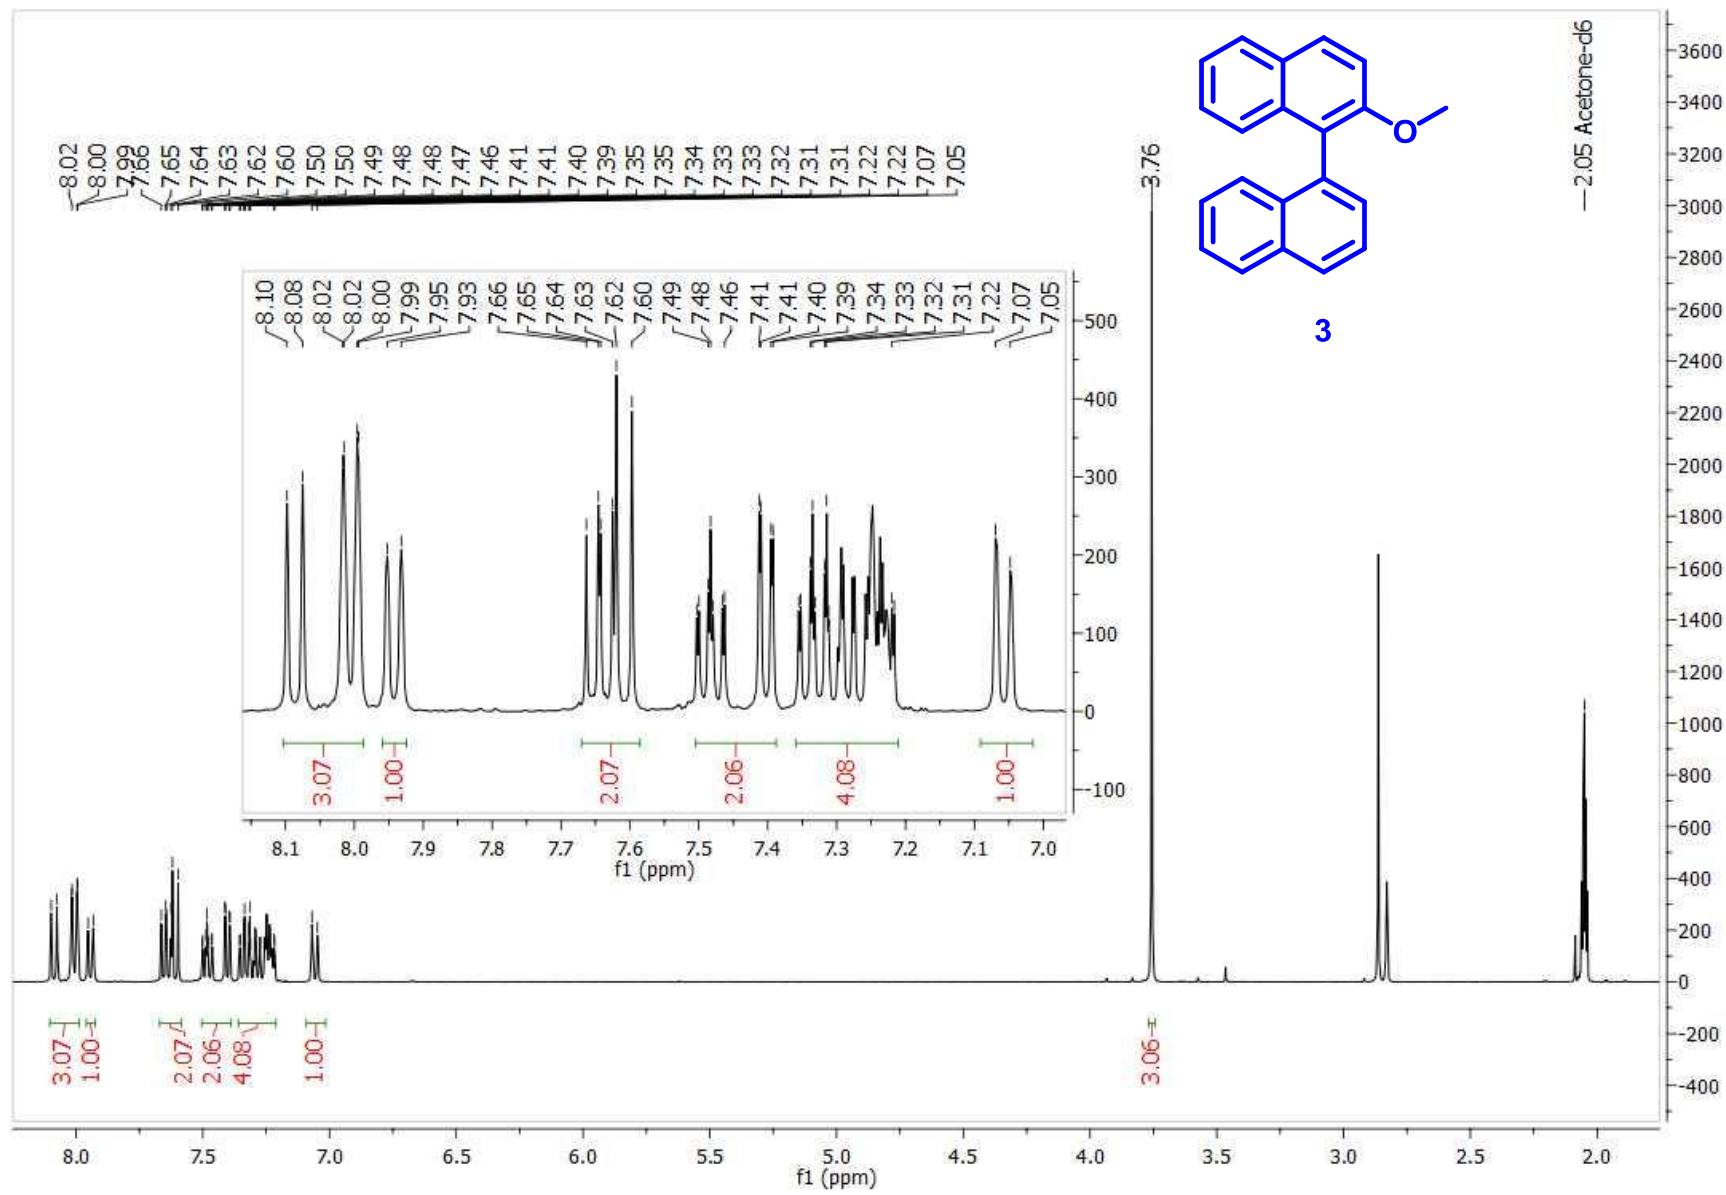

2,4 – Perylene-1-amine (4)  
<sup>1</sup>H-NMR (400 MHz, acetone-d<sub>6</sub>)

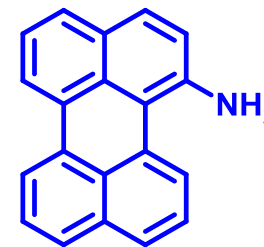

4

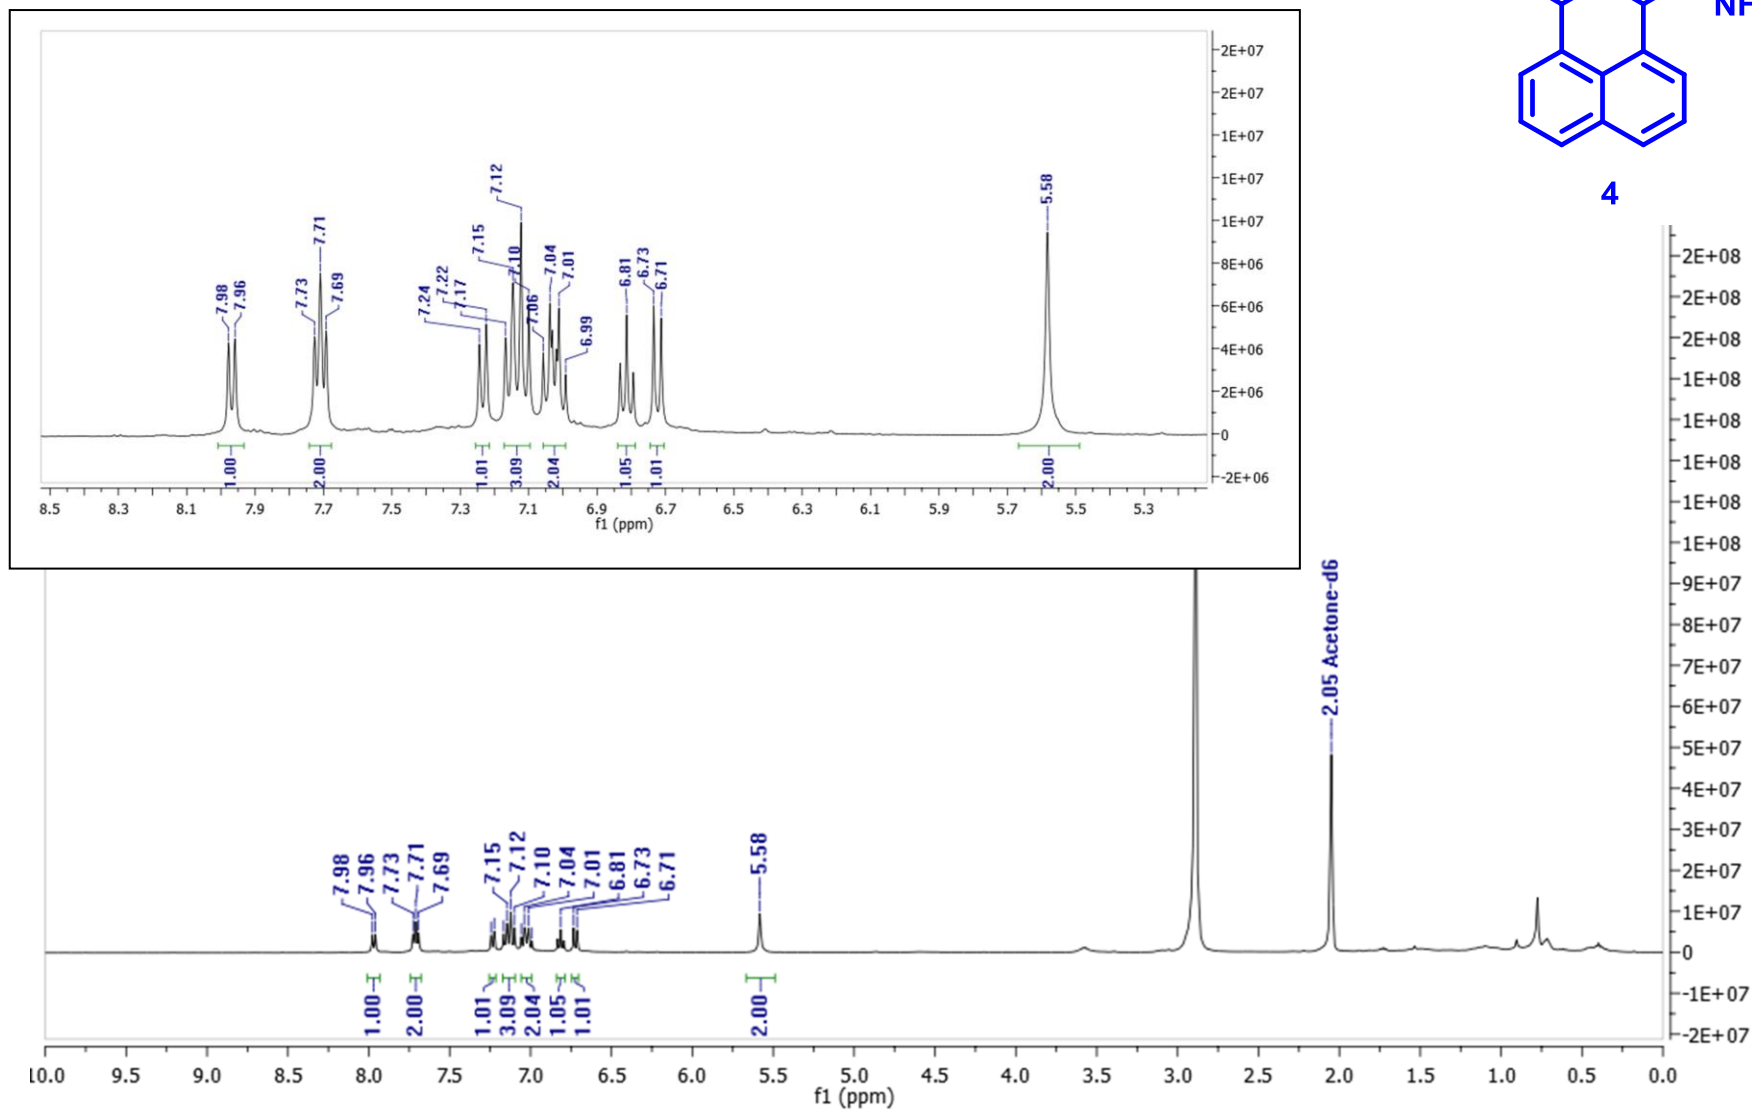



COSY

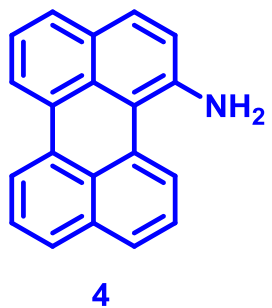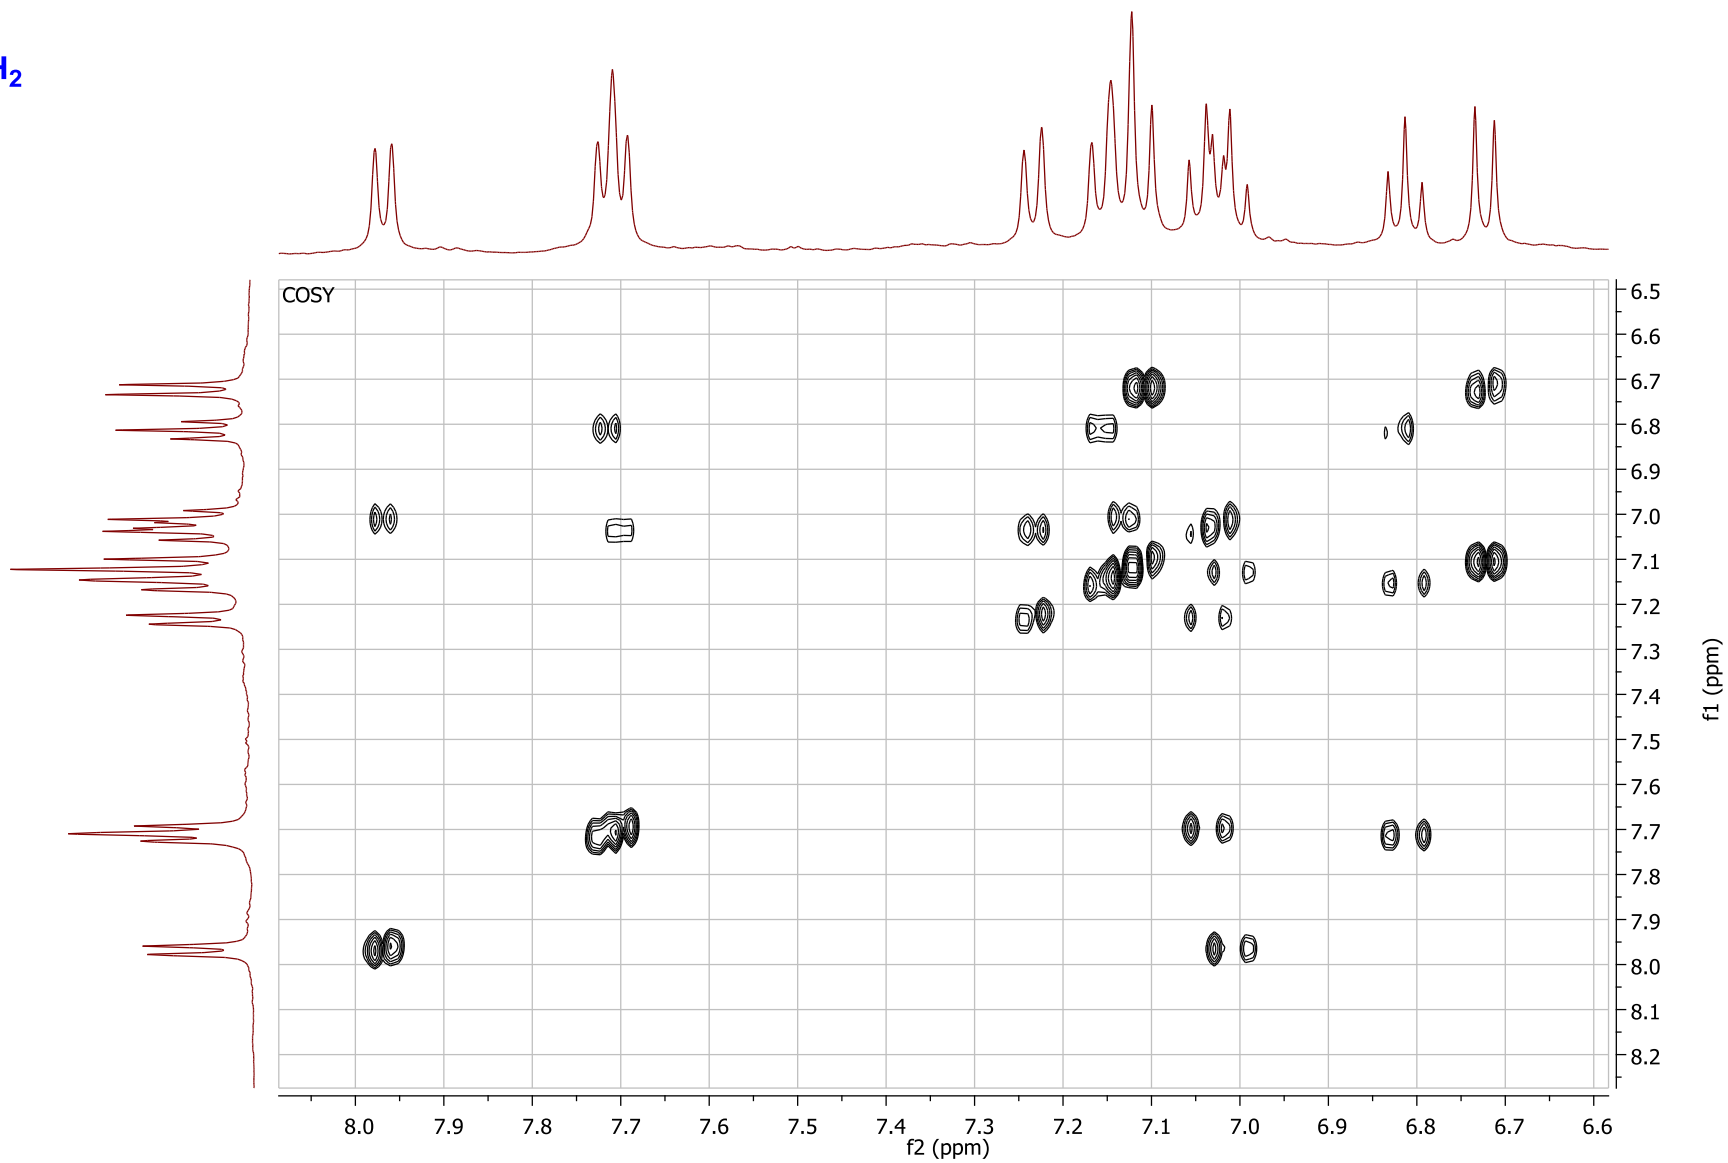

HSQC

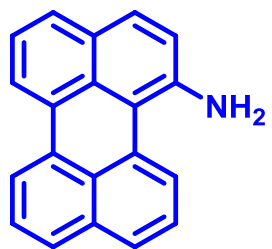

4

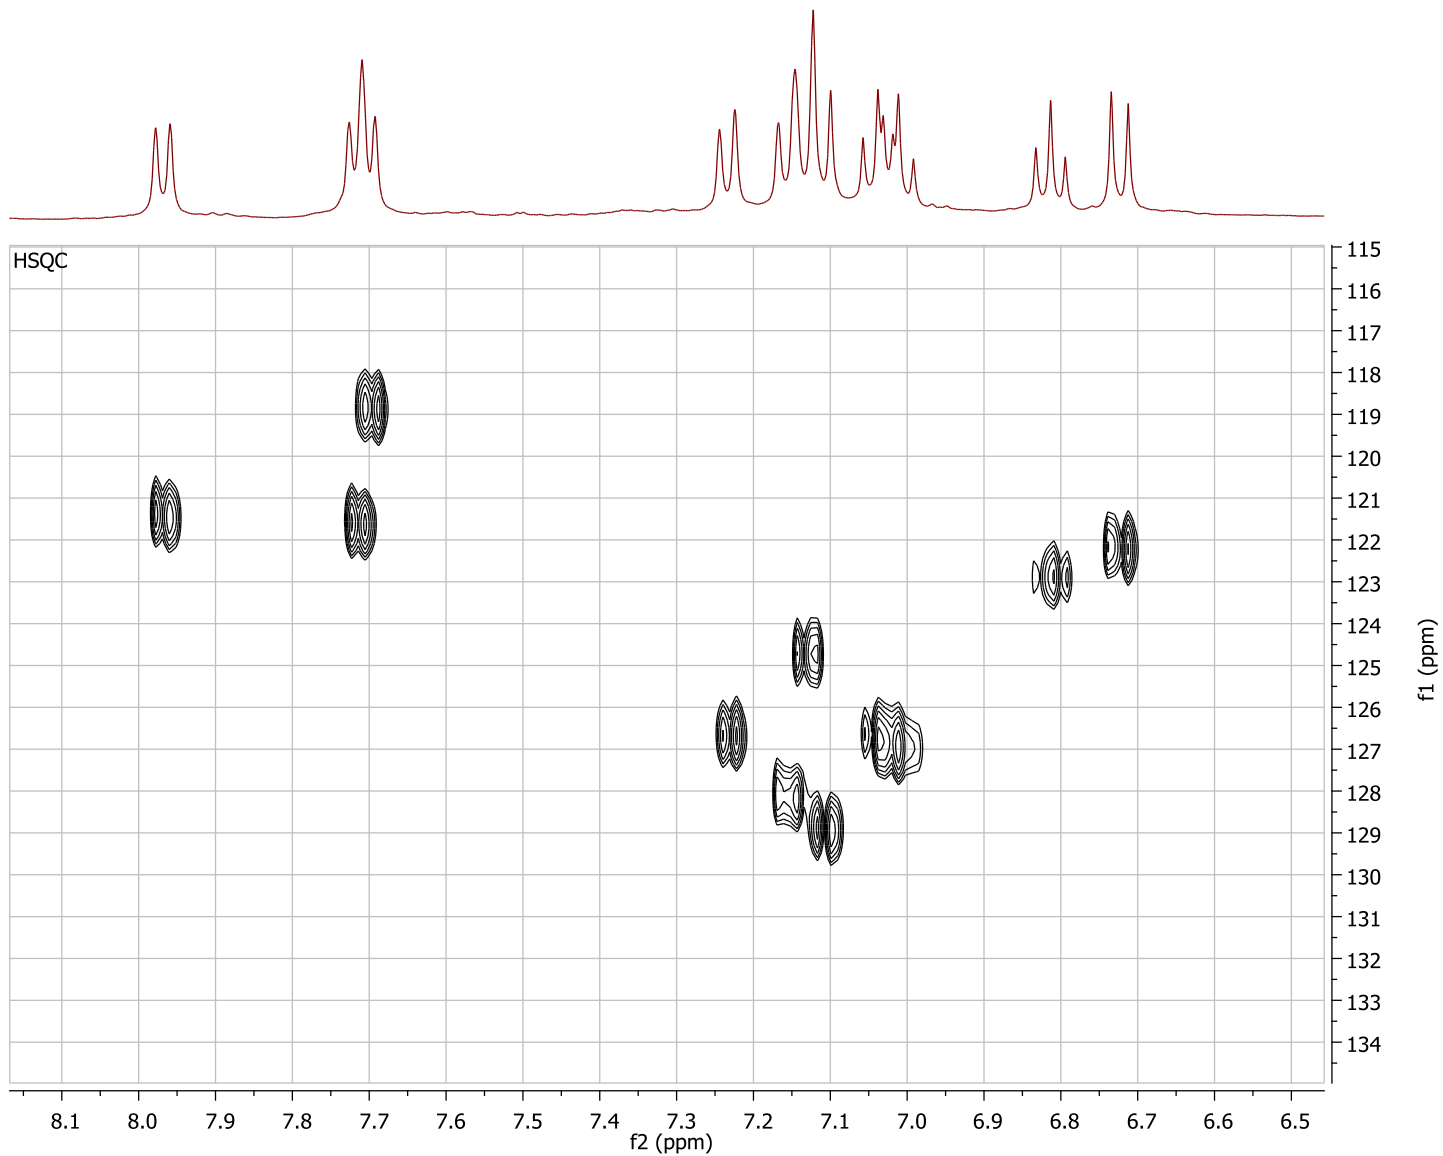

HMBC

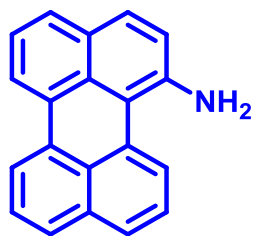

4

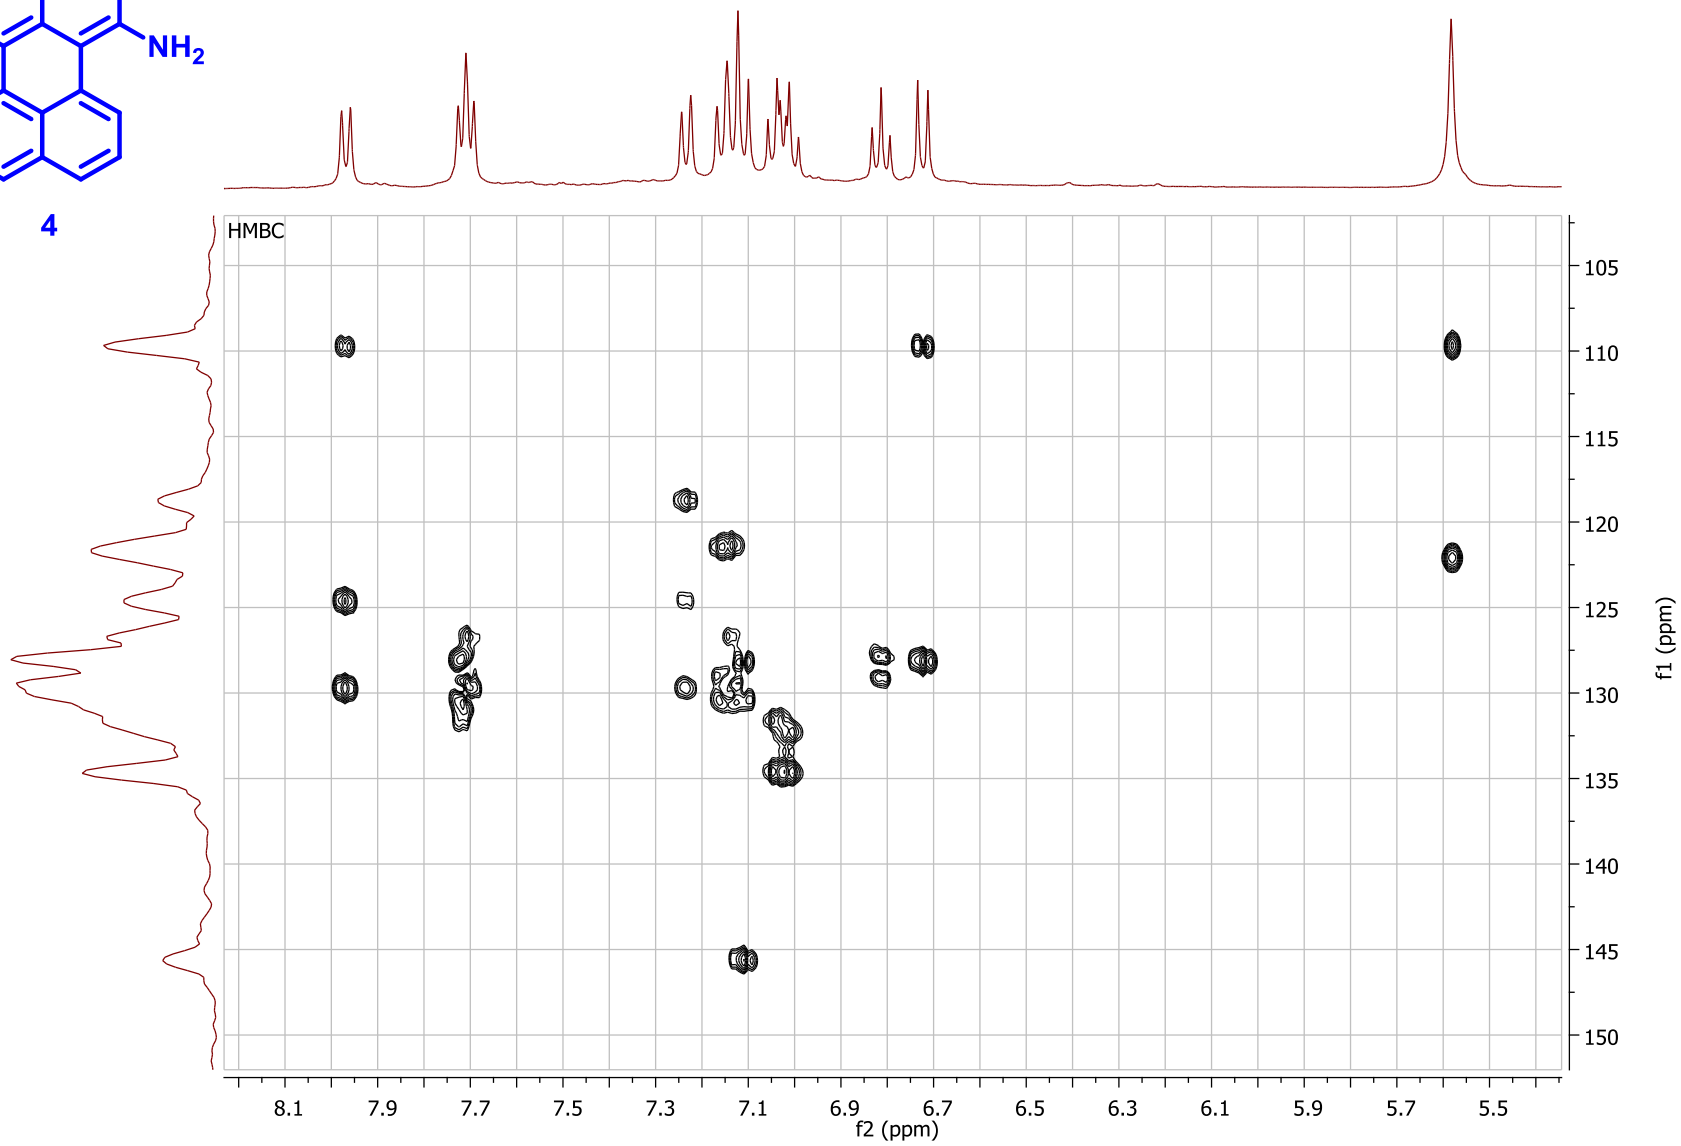

2.5 – *N,N*-dimethylperylene-1-amine (5)  
<sup>1</sup>H-NMR (400 MHz, acetone - d<sub>6</sub>)

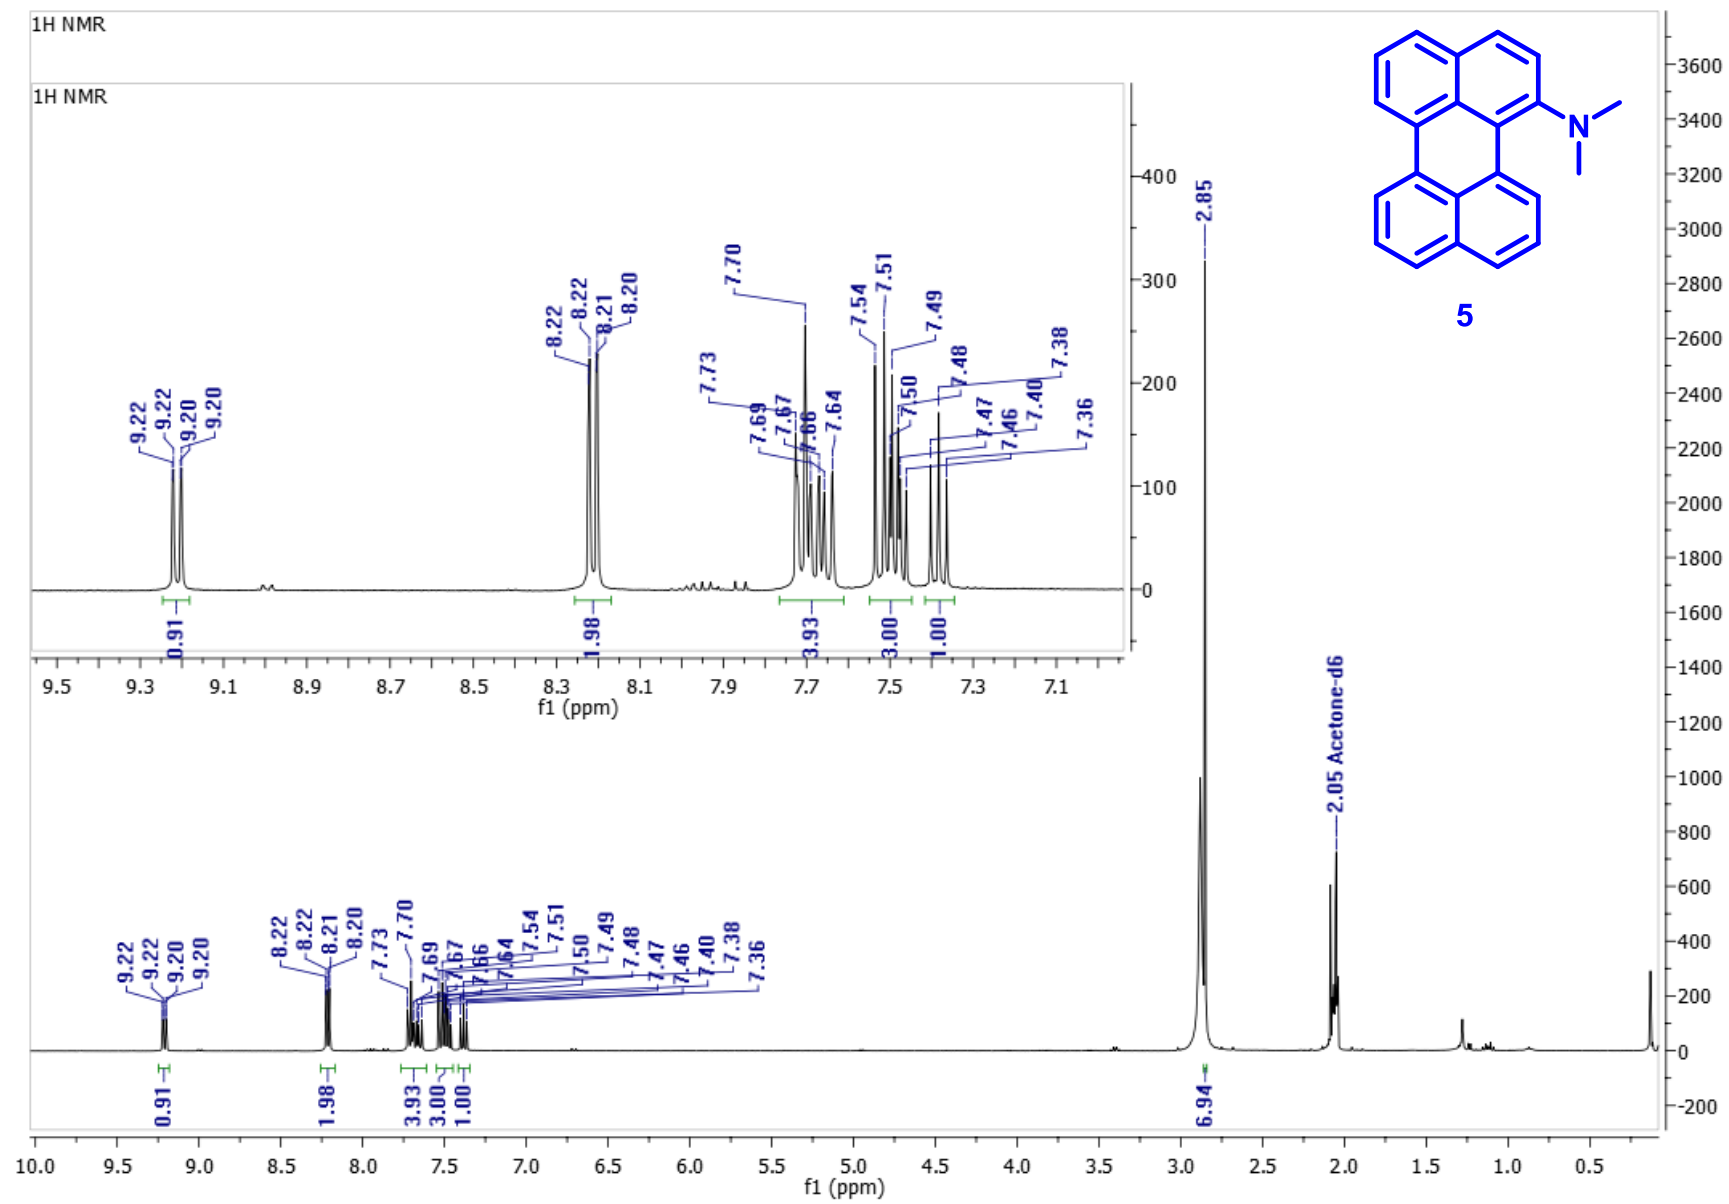

$^{13}\text{C}$ -NMR (100 MHz, acetone- $d_6$ )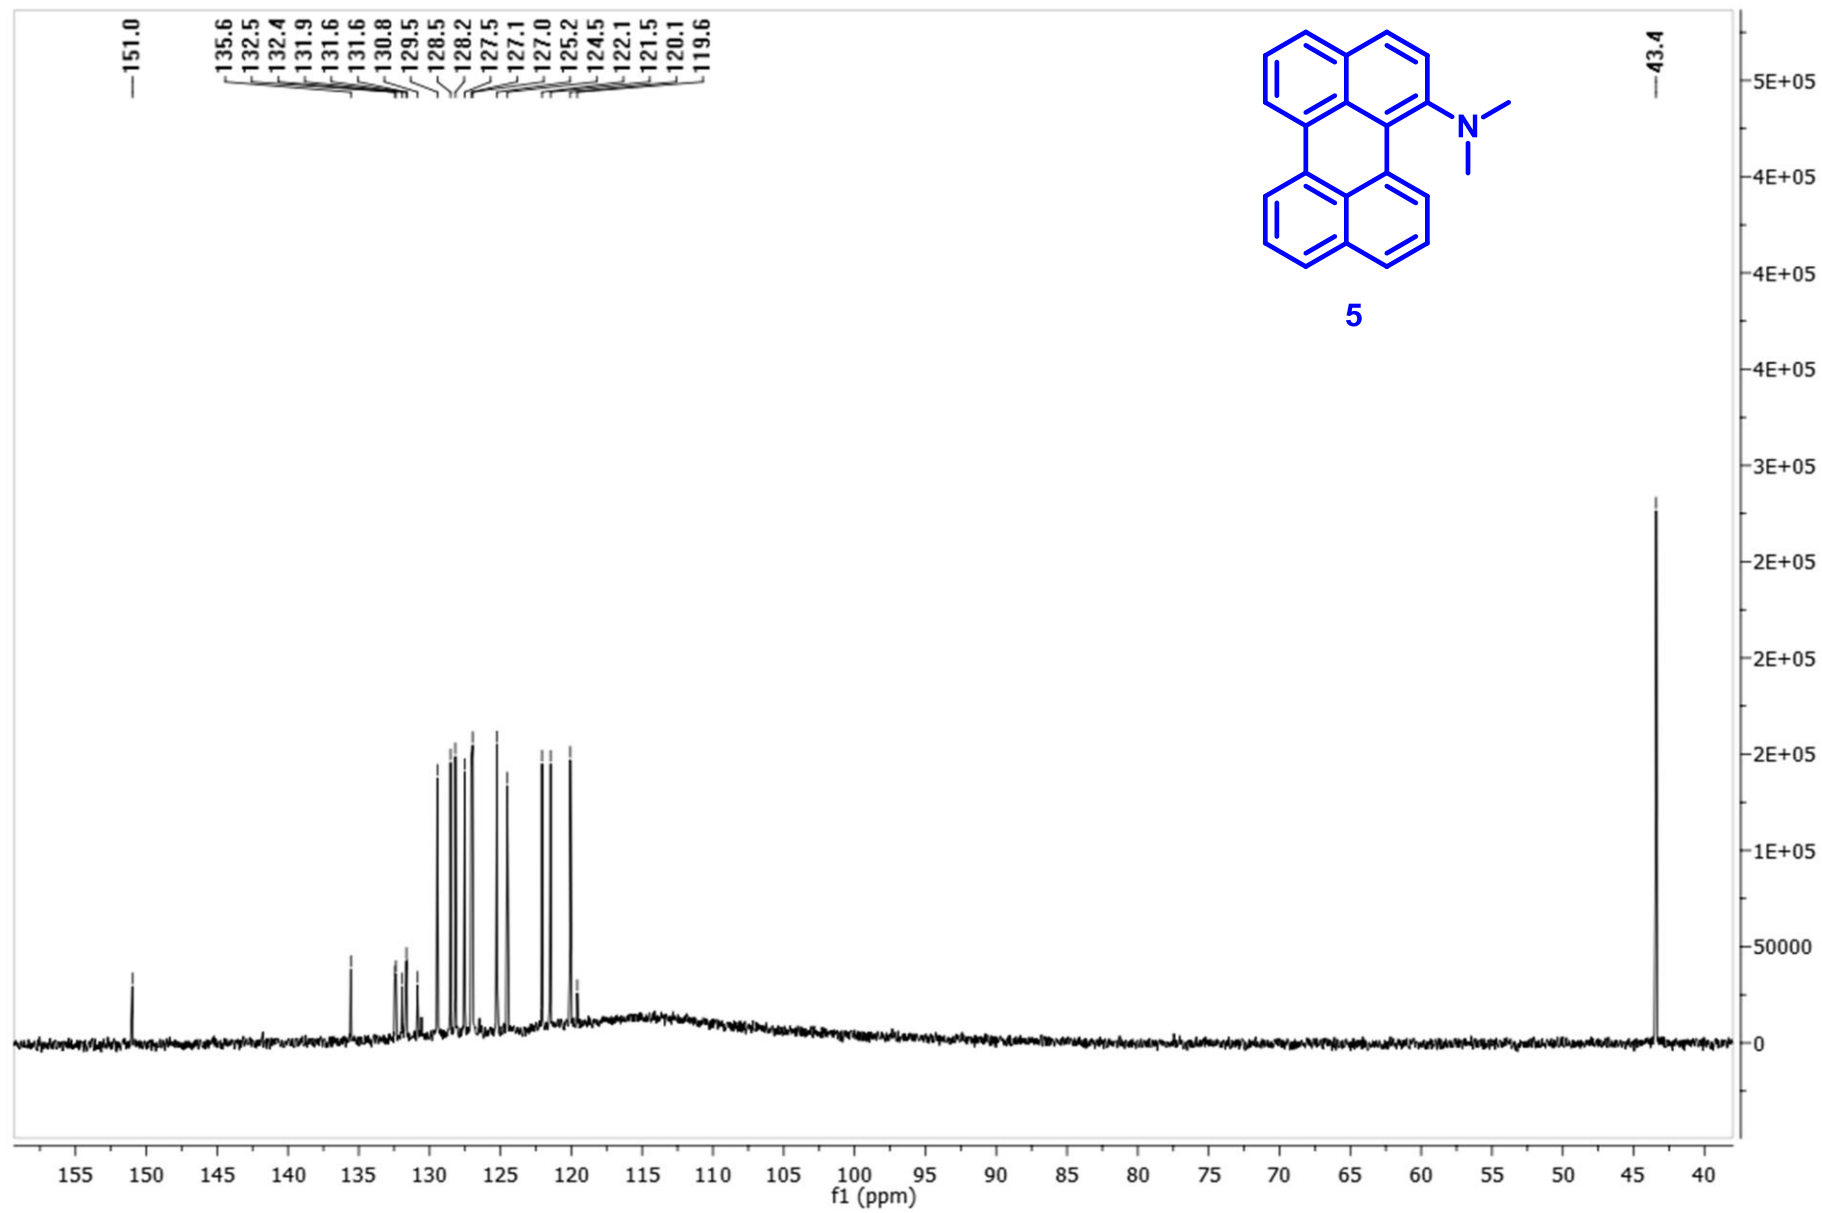

COSY

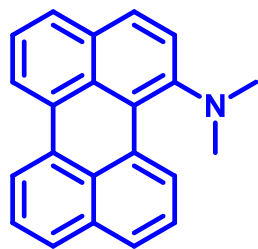

5

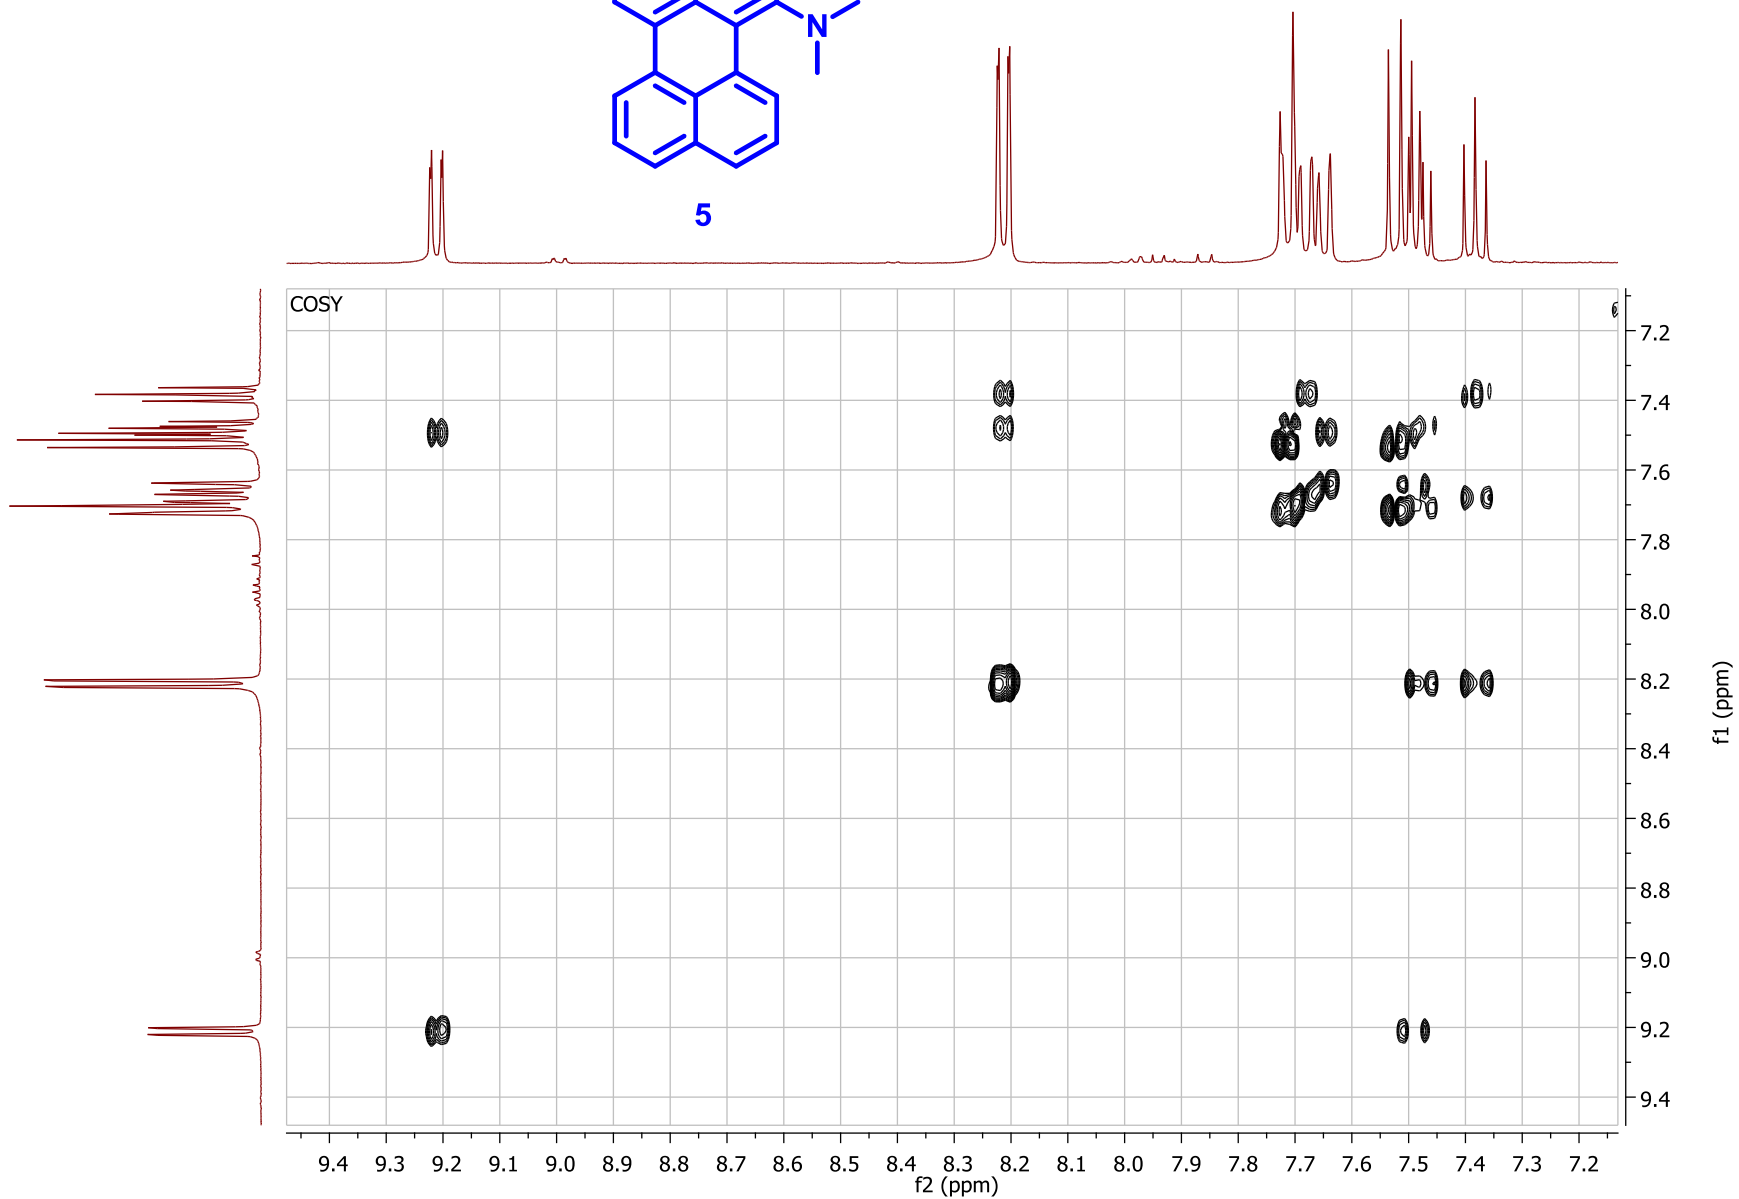

HSQC-DEPT

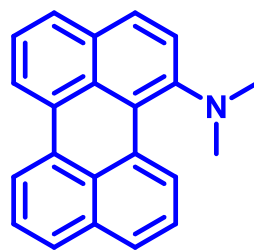

5

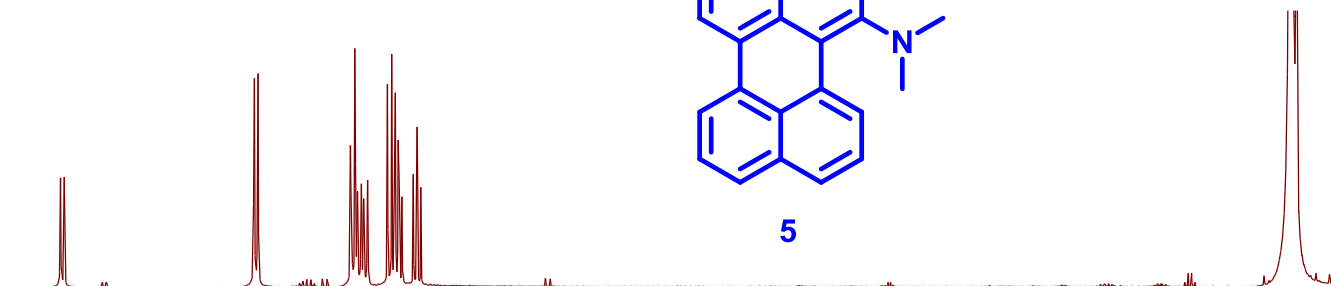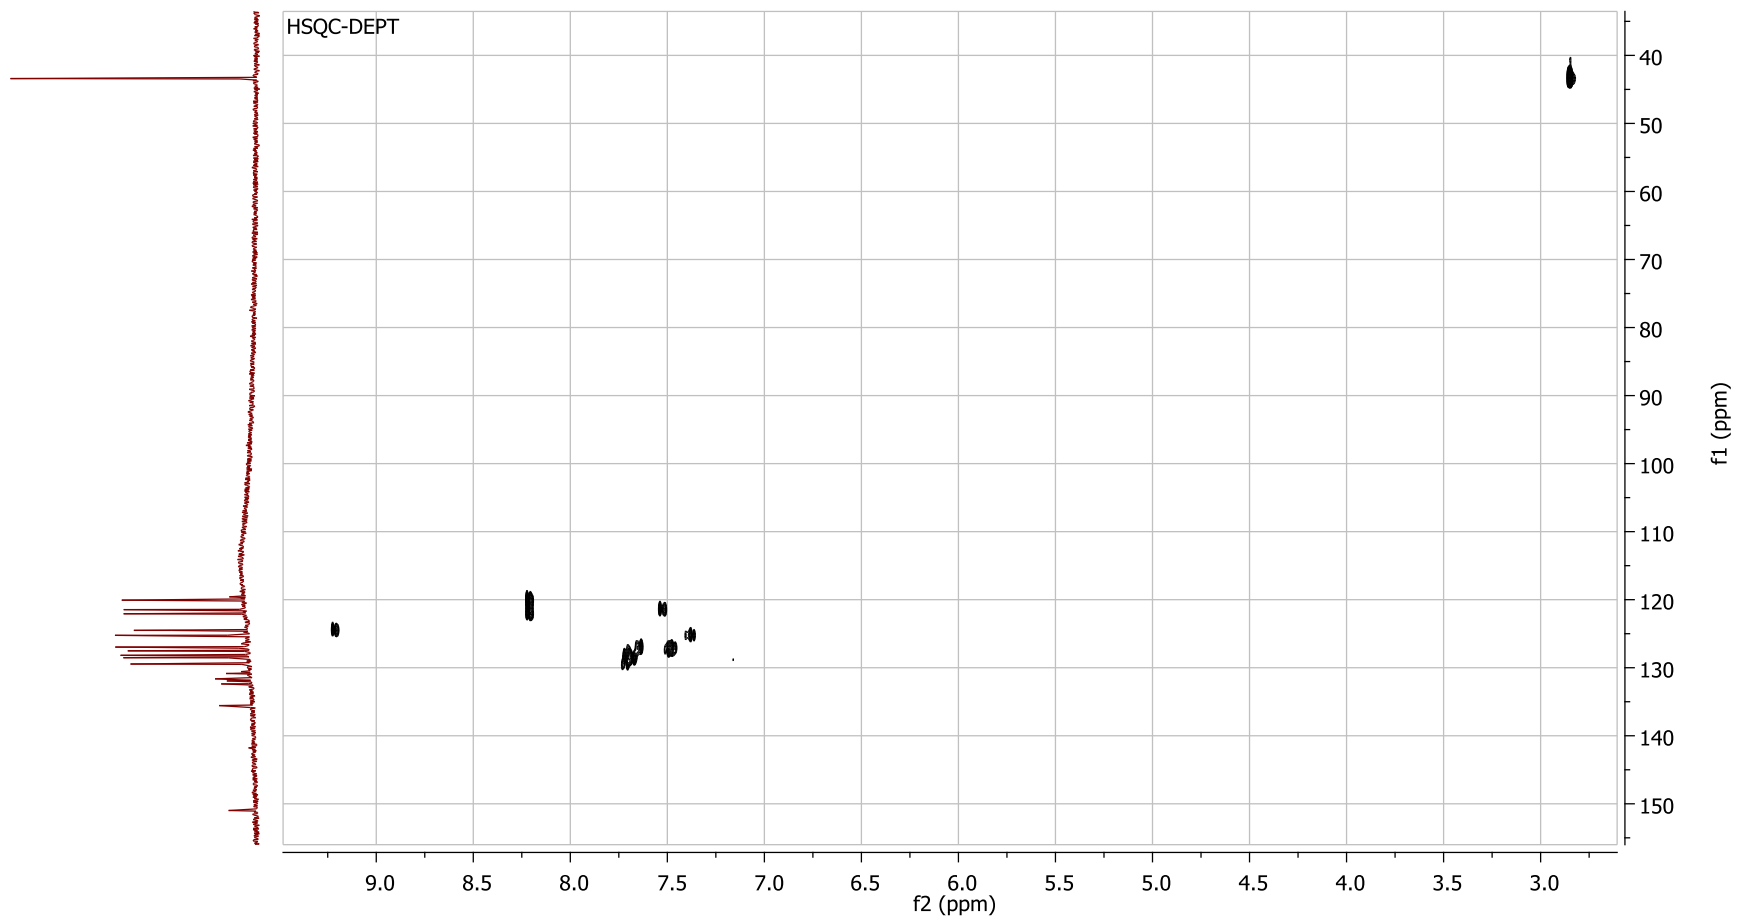

## HMBC

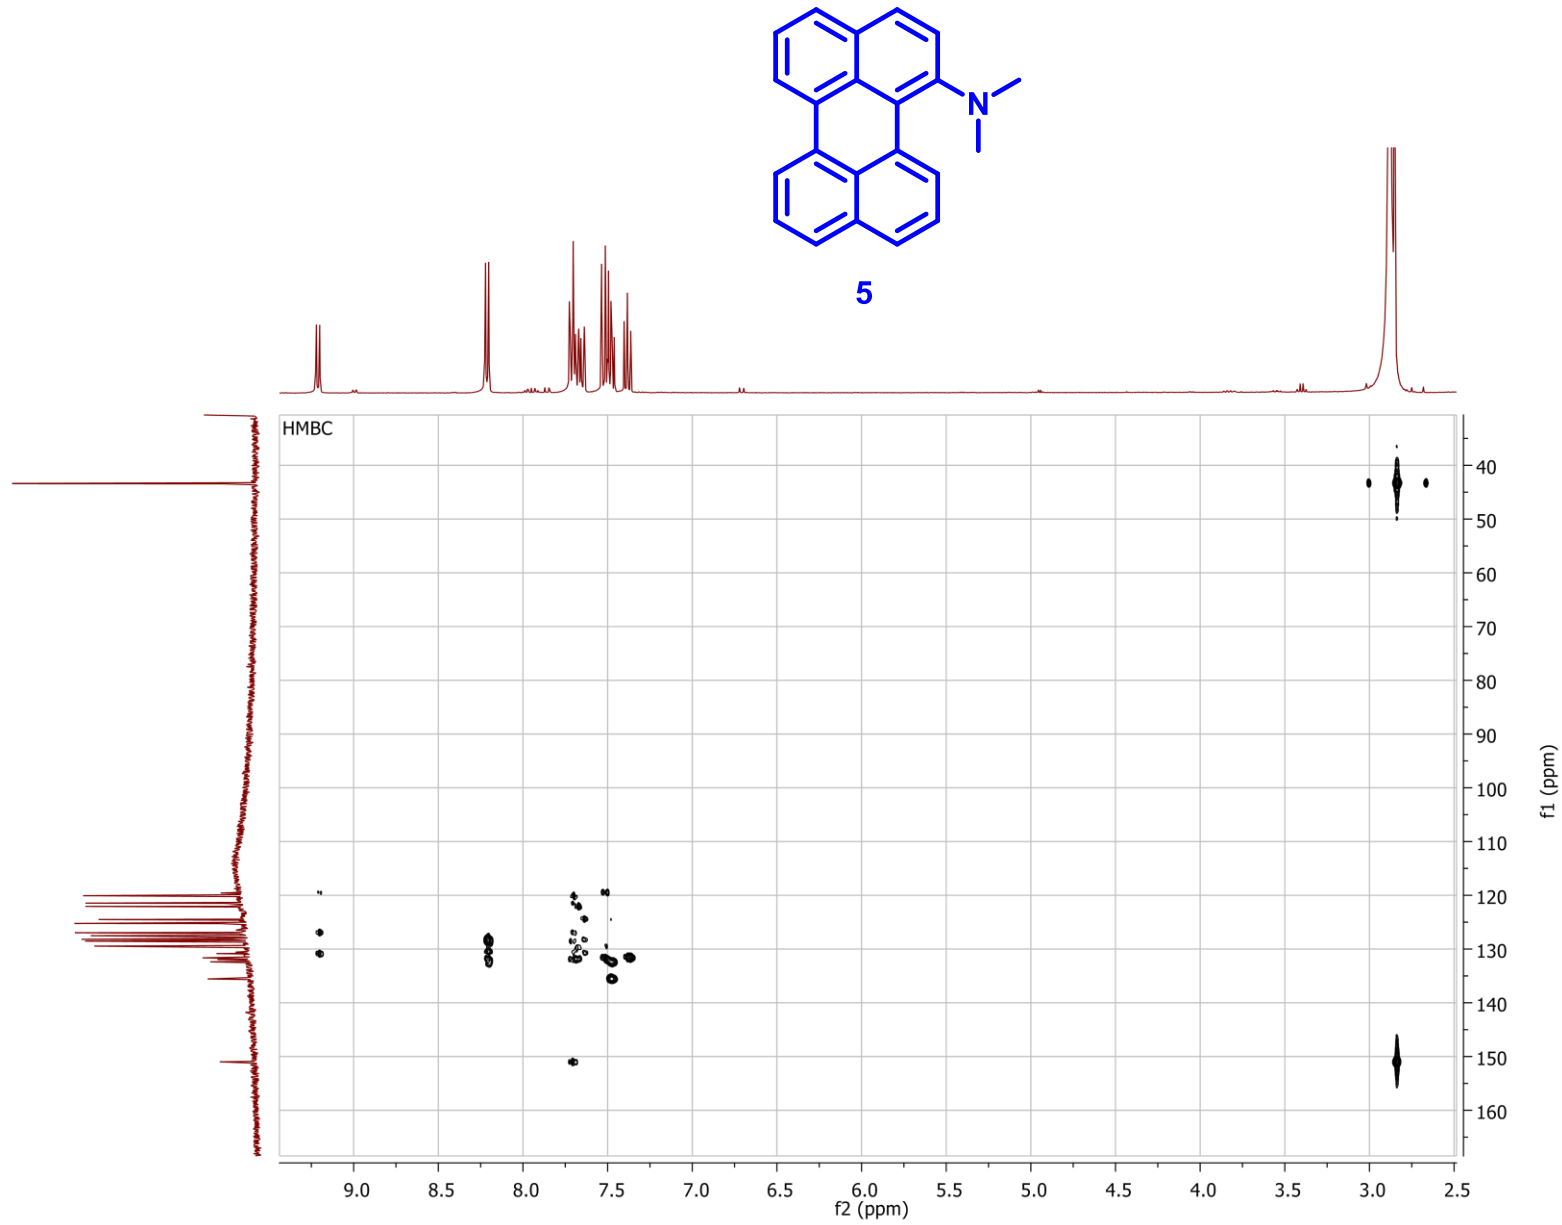



## HMBC

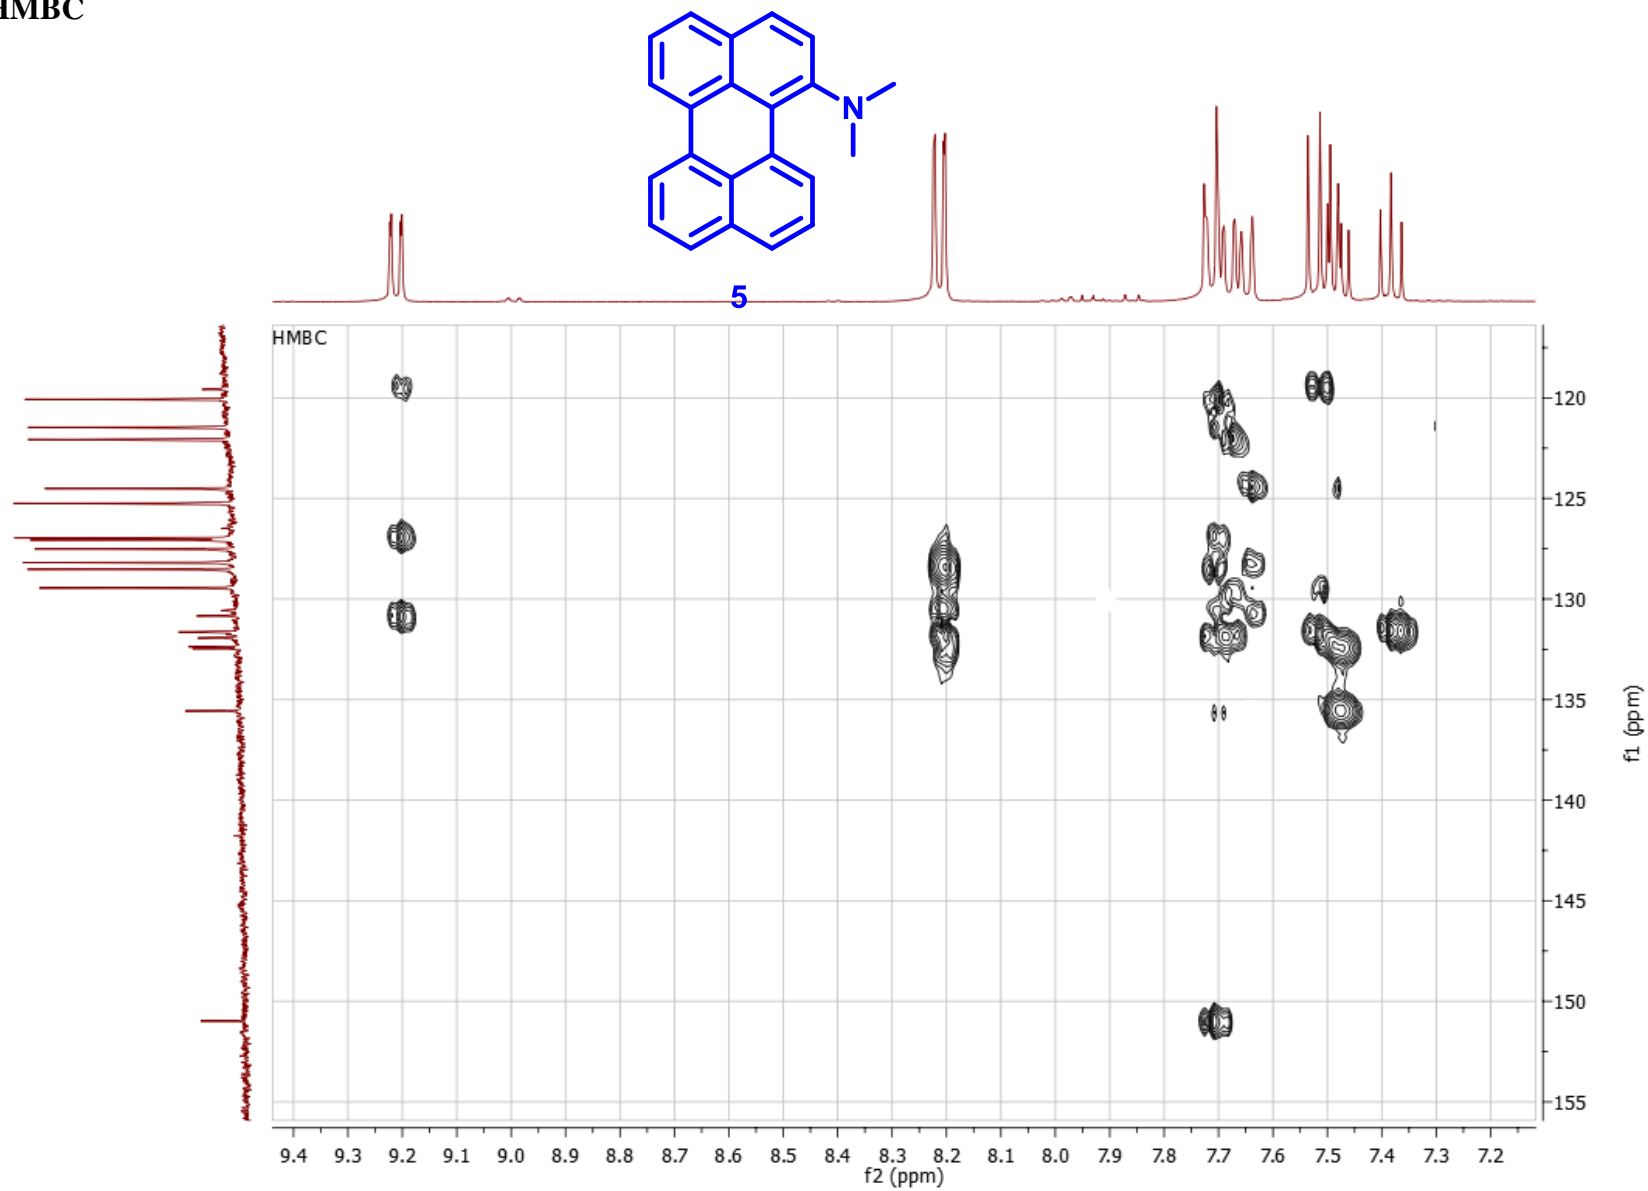

## 2.6 – Perylene (7)

 $^1\text{H-NMR}$  (400 MHz, chloroform -  $d_1$ )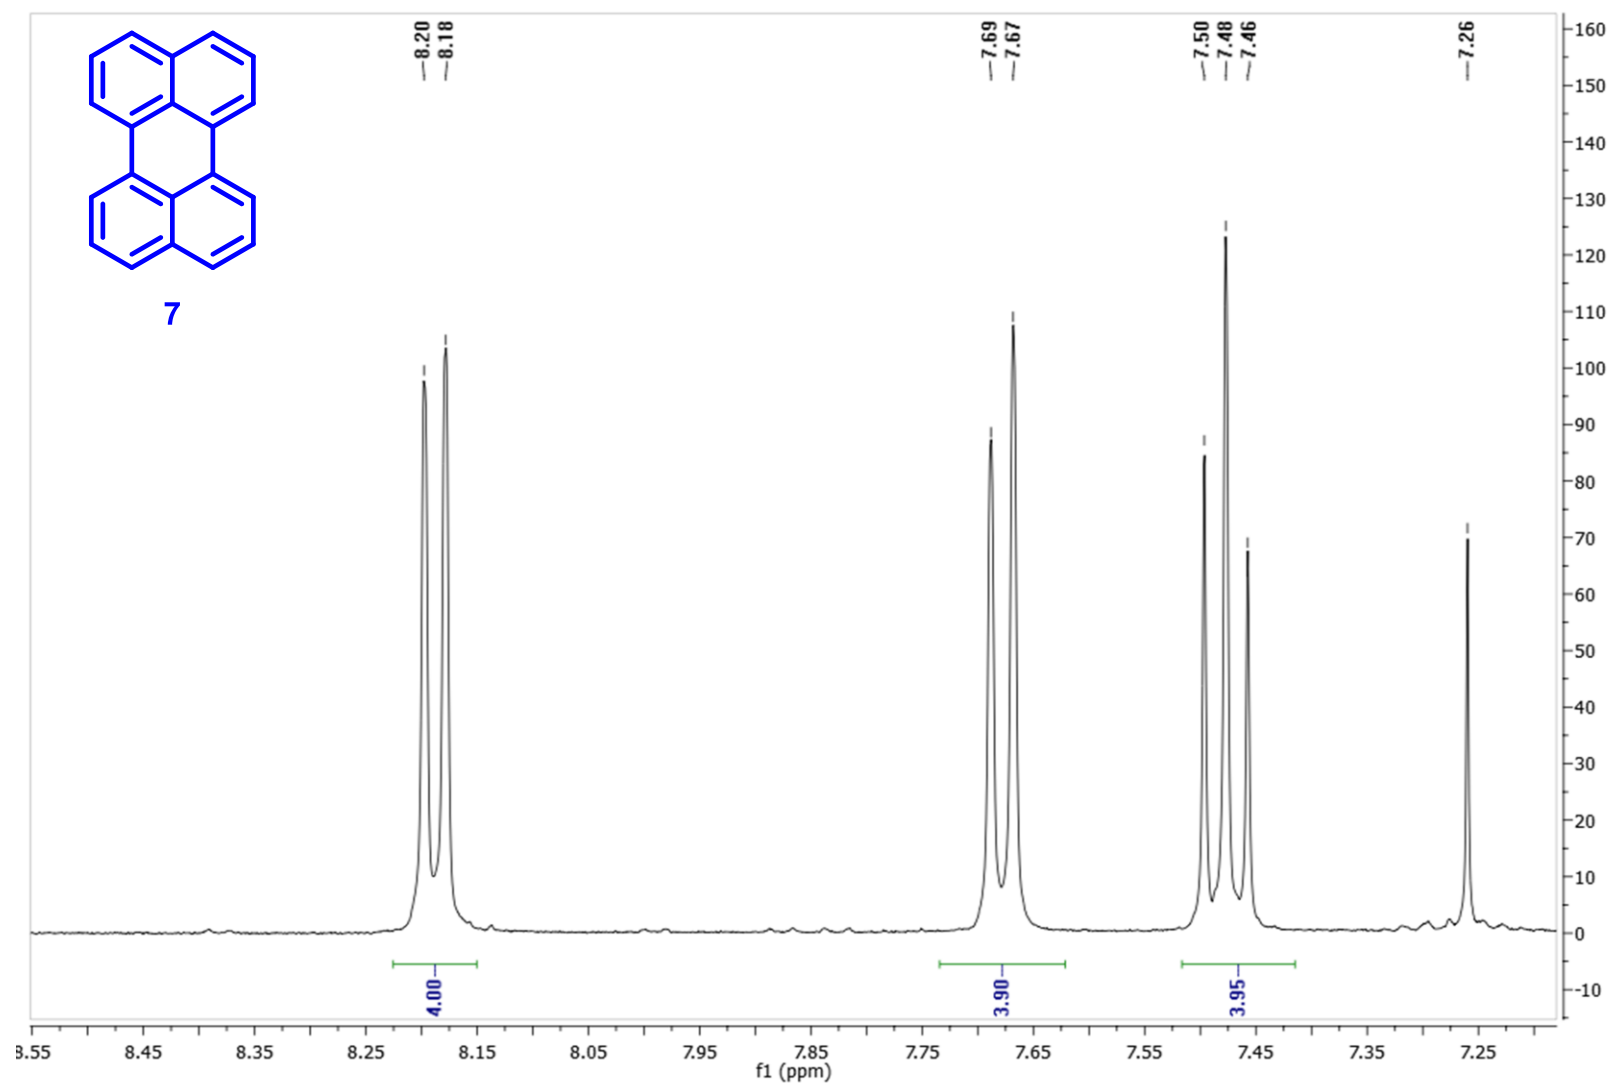

$^{13}\text{C}$ -NMR (100 MHz, chloroform- $d_1$ )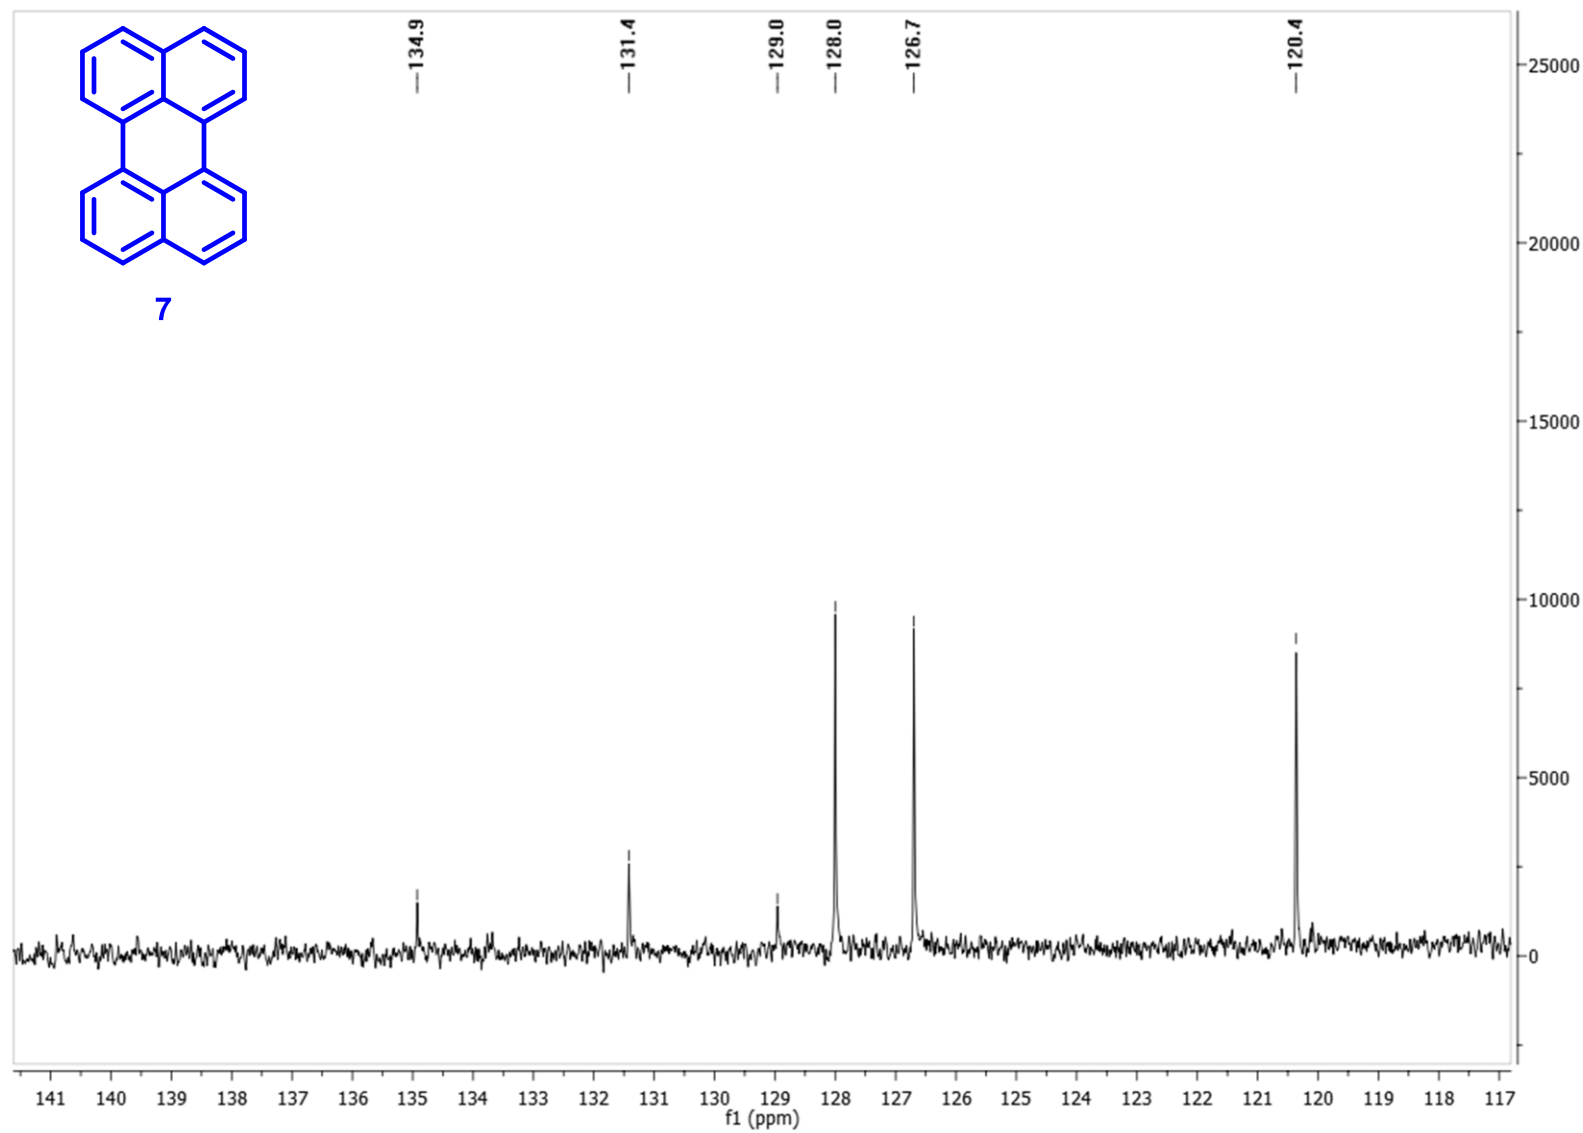

2.7 – 1,1':4',1''-Ternaphthalene (25)  
<sup>1</sup>H-NMR (400 MHz, dimethyl sulfoxide - d<sub>6</sub>)

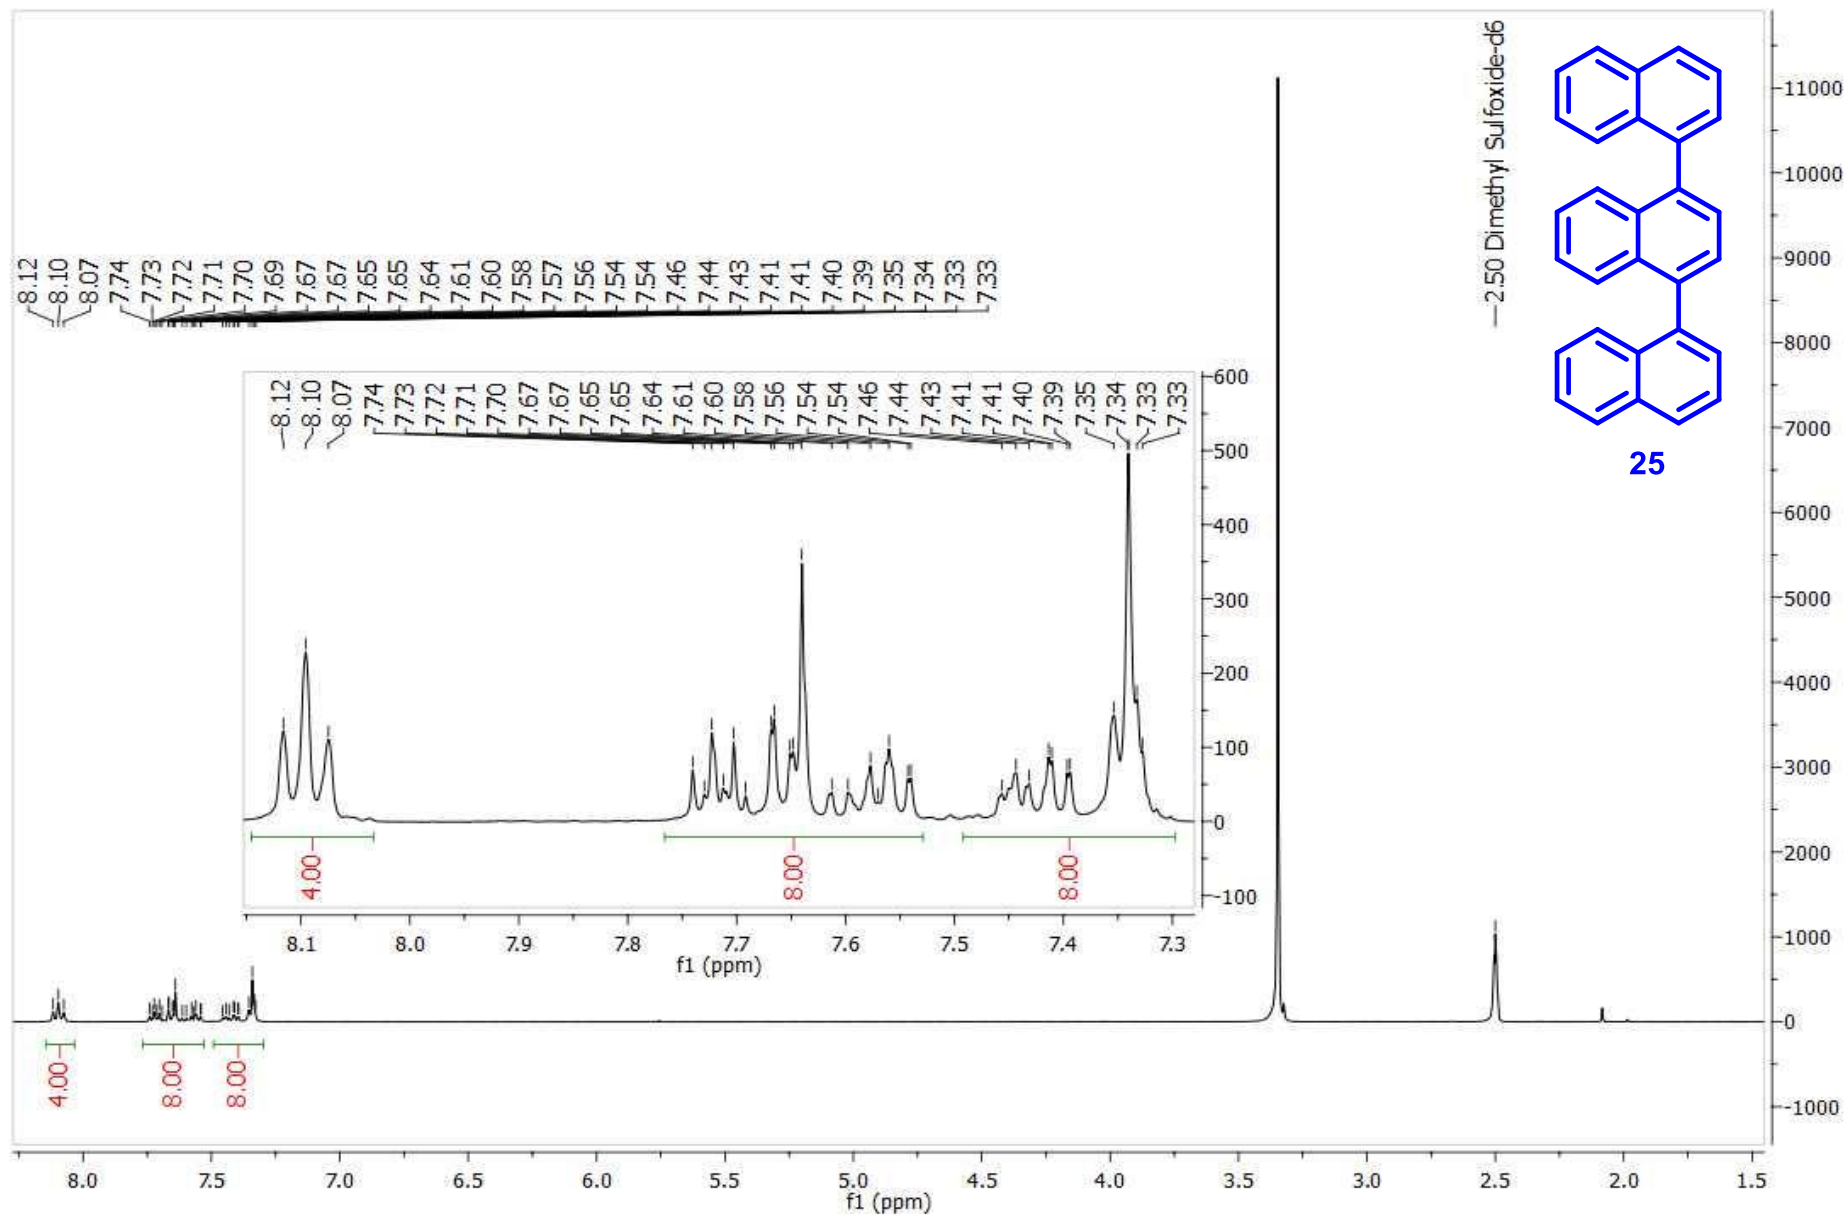

## 2.8 – Terrylene (26)

UV-Visible spectrum (max plot: 290 nm – 600 nm),  $\lambda_{\text{max}}$  (dichloromethane/nm): 550.4, 508.9, 476.1.

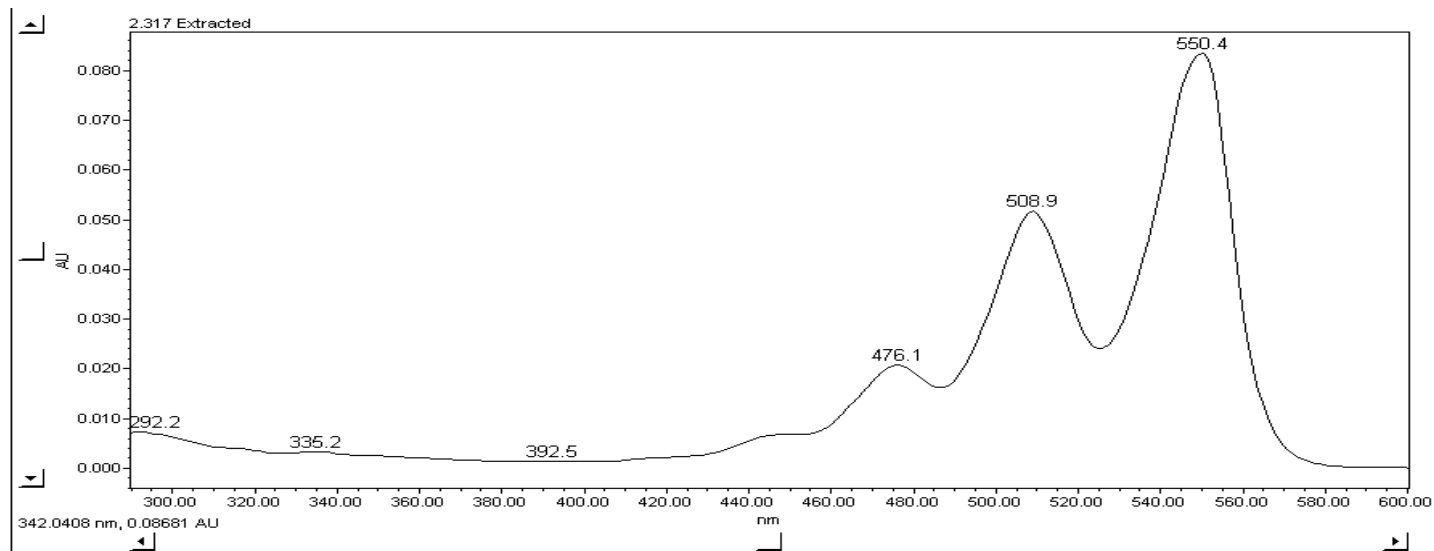

HPLC profile of the crude (Retention time of the terrylene (26): 2,325 minutes)

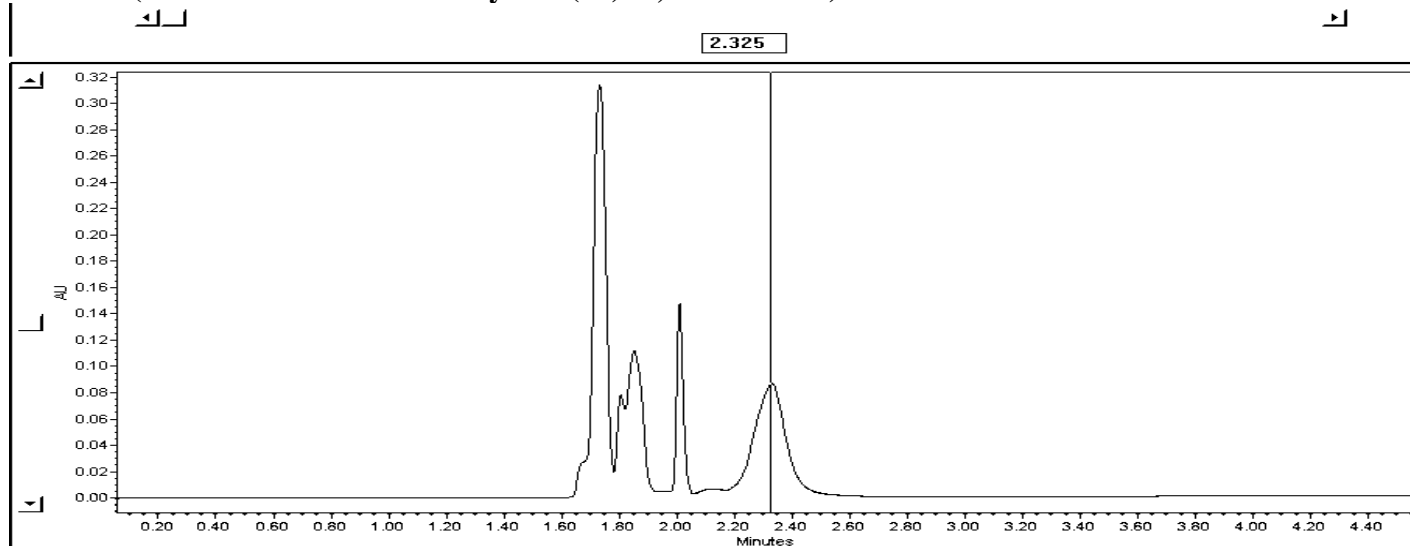

3. Boltzman population analysis for the formation of the  $\sigma$ -complex for 1a, 3, 8a, 9a and 25 at 170 °C.

| <i>1a</i>                                                                         | POSITION | Free energy (hartree) | DISTRIBUTION (%) |
|-----------------------------------------------------------------------------------|----------|-----------------------|------------------|
| 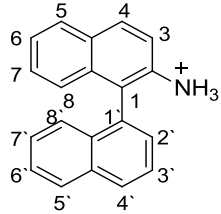 | 3        | -826,2282921          | 0,002            |
|                                                                                   | 4        | -826,2324889          | 0,042            |
|                                                                                   | 6        | -826,2295532          | 0,005            |
|                                                                                   | 7        | -826,231729           | 0,024            |
|                                                                                   | 8        | -826,2367836          | 0,906            |
|                                                                                   | 1'       | -826,2183974          | 0,00             |
|                                                                                   | 1'       | -826,2221522          | 0,000            |
|                                                                                   | 2'       | -826,230442           | 0,009            |
|                                                                                   | 3'       | -826,2352079          | 0,295            |
|                                                                                   | 4'       | -826,2367529          | 0,887            |
|                                                                                   | 6'       | -826,2356459          | 0,403            |
|                                                                                   | 7'       | -826,234777           | 0,217            |
|                                                                                   | 8'       | -826,2410341          | 18,744           |
|                                                                                   | 5'       | -826,2429349          | 72,627           |
|                                                                                   | 5        | -826,2393963          | 5,834            |

| <i>3</i>                                                                            | POSITION | Free energy (hartree) | DISTRIBUTION (%) |
|-------------------------------------------------------------------------------------|----------|-----------------------|------------------|
| 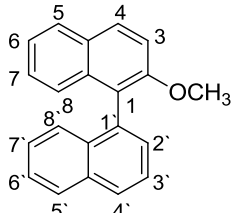 | 1        | -884,9680662          | 98,028           |
|                                                                                     | 1'       | -884,9496278          | 0,000            |
|                                                                                     | 4'       | -884,9595187          | 0,221            |
|                                                                                     | 3        | -884,9586138          | 0,116            |
|                                                                                     | 4        | -884,9566046          | 0,027            |
|                                                                                     | 6        | -884,9621101          | 1,406            |
|                                                                                     | 5'       | -884,9576465          | 0,058            |
|                                                                                     | 7        | -884,9457156          | 0,000            |
|                                                                                     | 5        | -884,9568769          | 0,033            |
|                                                                                     | 8        | -884,9580566          | 0,078            |
|                                                                                     | 2'       | -884,9524577          | 0,001            |
|                                                                                     | 3'       | -884,9510377          | 0,000            |
|                                                                                     | 6'       | -884,9518688          | 0,000            |
|                                                                                     | 7'       | -884,9525107          | 0,001            |
|                                                                                     | 8'       | -884,9563727          | 0,023            |

| <b>8a</b>                                                                         | <b>POSITION</b> | <b>Free energy<br/>(hartree)</b> | <b>DISTRIBUTION<br/>(%)</b> |
|-----------------------------------------------------------------------------------|-----------------|----------------------------------|-----------------------------|
| 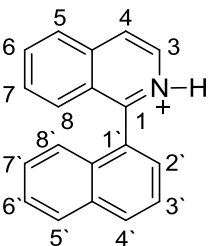 | 2'              | -786,9548501                     | 0,00                        |
|                                                                                   | 3               | -786,9370503                     | 0,00                        |
|                                                                                   | 3'              | -786,9632236                     | 0,86                        |
|                                                                                   | 4               | -786,9441799                     | 0,00                        |
|                                                                                   | 4'              | -786,9616616                     | 0,28                        |
|                                                                                   | 5               | -786,952354                      | 0,00                        |
|                                                                                   | 5'              | -786,9682493                     | 30,79                       |
|                                                                                   | 6               | -786,9319044                     | 0,00                        |
|                                                                                   | 6'              | -786,9641105                     | 1,61                        |
|                                                                                   | 7               | -786,9446108                     | 0,00                        |
|                                                                                   | 7'              | -786,962033                      | 0,37                        |
|                                                                                   | 8               | -786,9451072                     | 0,00                        |
|                                                                                   | 8'              | -786,9693208                     | 66,08                       |
|                                                                                   | 1               | -786,9145461                     | 0,00                        |
|                                                                                   | 1'              | -786,9539631                     | 0,00                        |
| 1'(isomer)                                                                        | -786,9535537    | 0,00                             |                             |

| <b>9a</b>                                                                           | <b>POSITION</b> | <b>Free energy<br/>(hartree)</b> | <b>DISTRIBUTION<br/>(%)</b> |
|-------------------------------------------------------------------------------------|-----------------|----------------------------------|-----------------------------|
| 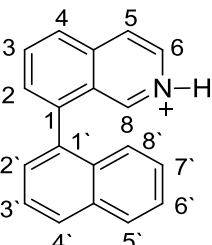 | 1'              | -786,9599028                     | 0,006                       |
|                                                                                     | 1' (isomer)     | -786,9596527                     | 0,005                       |
|                                                                                     | 1               | -786,9402599                     | 0,000                       |
|                                                                                     | 2               | -786,9493587                     | 0,000                       |
|                                                                                     | 2'              | -786,963592                      | 0,094                       |
|                                                                                     | 3               | -786,9312256                     | 0,000                       |
|                                                                                     | 3'              | -786,9666114                     | 0,814                       |
|                                                                                     | 4               | -786,9586207                     | 0,002                       |
|                                                                                     | 4'              | -786,9702838                     | 11,142                      |
|                                                                                     | 5               | -786,9342957                     | 0,000                       |
|                                                                                     | 5'              | -786,9722998                     | 46,887                      |
|                                                                                     | 6               | -786,936962                      | 0,000                       |
|                                                                                     | 6'              | -786,9667391                     | 0,8917                      |
|                                                                                     | 7'              | -786,9664098                     | 0,7052                      |
|                                                                                     | 8'              | -786,9720572                     | 39,4444                     |
| 8                                                                                   | -786,9216706    | 0,00                             |                             |

| 25                                                                                                                                                                                                                                                                                                                                                              | POSITION      | <i>Free energy</i><br>(hartree) | <i>DISTRIBUTION</i><br>(%) |
|-----------------------------------------------------------------------------------------------------------------------------------------------------------------------------------------------------------------------------------------------------------------------------------------------------------------------------------------------------------------|---------------|---------------------------------|----------------------------|
| 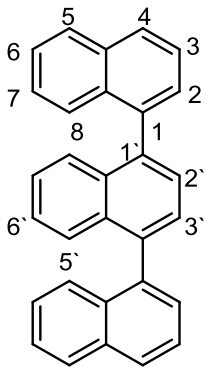 <p>The image shows three views of a fluorene derivative. The top view shows a fluorene skeleton with positions 1-8 labeled. The middle view shows the same skeleton with positions 1'-6' labeled. The bottom view shows a different orientation of the fluorene skeleton.</p> | 1             | -1154,942848                    | 0,012                      |
|                                                                                                                                                                                                                                                                                                                                                                 | 1 (isomer a)  | -1154,942902                    | 0,012                      |
|                                                                                                                                                                                                                                                                                                                                                                 | 1 (isomer b)  | -1154,942579                    | 0,010                      |
|                                                                                                                                                                                                                                                                                                                                                                 | 1 (isomer c)  | -1154,942535                    | 0,009                      |
|                                                                                                                                                                                                                                                                                                                                                                 | 1'            | -1154,945507                    | 0,080                      |
|                                                                                                                                                                                                                                                                                                                                                                 | 1' (isomer a) | -1154,946398                    | 0,152                      |
|                                                                                                                                                                                                                                                                                                                                                                 | 1' (isomer b) | -1154,945421                    | 0,075                      |
|                                                                                                                                                                                                                                                                                                                                                                 | 1' (isomer c) | -1154,944482                    | 0,038                      |
|                                                                                                                                                                                                                                                                                                                                                                 | 2             | -1154,947452                    | 0,322                      |
|                                                                                                                                                                                                                                                                                                                                                                 | 3             | -1154,947285                    | 0,286                      |
|                                                                                                                                                                                                                                                                                                                                                                 | 4             | -1154,954901                    | 65,068                     |
|                                                                                                                                                                                                                                                                                                                                                                 | 5             | -1154,95249                     | 11,672                     |
|                                                                                                                                                                                                                                                                                                                                                                 | 6             | -1154,946967                    | 0,228                      |
|                                                                                                                                                                                                                                                                                                                                                                 | 7             | -1154,947646                    | 0,369                      |
|                                                                                                                                                                                                                                                                                                                                                                 | 8             | -1154,952525                    | 11,966                     |
|                                                                                                                                                                                                                                                                                                                                                                 | 5'            | -1154,952153                    | 9,179                      |
| 6'                                                                                                                                                                                                                                                                                                                                                              | -1154,947341  | 0,297                           |                            |
| 2'                                                                                                                                                                                                                                                                                                                                                              | -1154,946895  | 0,216                           |                            |



4. Representation of electrostatic potential isosurface of  $3\sigma$ . Protonated at position 1 (most stable), left side. Protonated at position 5', right side.

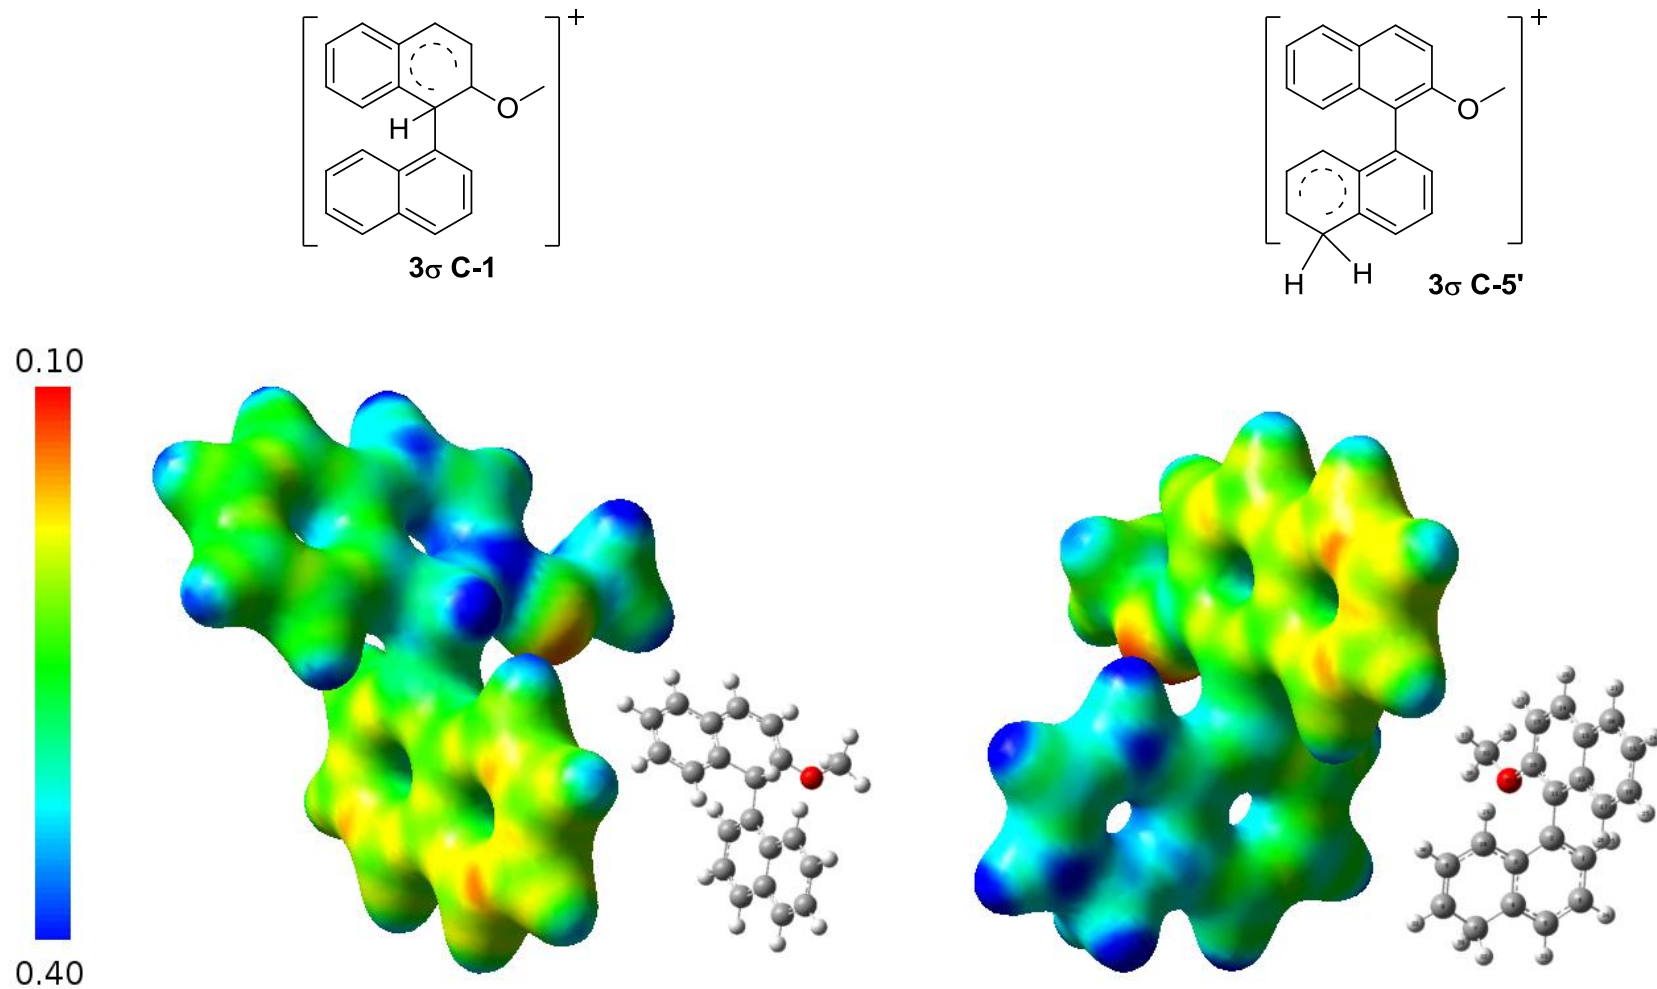

5. Comparison between the free energies of reaction ( $\Delta G_r$ ) and activation ( $\Delta G^\ddagger$ ) for the ring closure by Scholl reaction of the complexes  $1\sigma$ ,  $2\sigma$ ,  $8\sigma$ ,  $9\sigma$  and  $25\sigma$  calculated in *N*-methylformamide and dichloromethane.

| $\sigma$ -complex | <i>N</i> -methylformamide<br>( $\epsilon \sim 181.5$ ) |                                   | Dichloromethane<br>( $\epsilon \sim 8.93$ ) |                                   | Intermediary |
|-------------------|--------------------------------------------------------|-----------------------------------|---------------------------------------------|-----------------------------------|--------------|
|                   | $\Delta G_r$<br>(kcal/mol)                             | $\Delta G^\ddagger$<br>(kcal/mol) | $\Delta G_r$<br>(kcal/mol)                  | $\Delta G^\ddagger$<br>(kcal/mol) |              |
| $1\sigma$         | 19.1                                                   | 24.5                              | 16.3                                        | 21.18                             |              |
| $2\sigma$         | 18.3                                                   | 23.1                              | 16.1                                        | 21.46                             |              |
| $25\sigma$        | 11.13                                                  | 19.79                             | 11.97                                       | 19.97                             |              |
| $8\sigma$         | 23.2                                                   | 26.1                              | 23.21                                       | 24.47                             |              |
| $9\sigma$         | 39.9                                                   | 40.3                              | 40.06                                       | 40.41                             |              |

## 6. Description of the procedure employed for the calculation of Redox Potential. Taken from Ref. 38.

The overall calculated reaction is presented in the thermodynamic cycle shown in scheme 1:

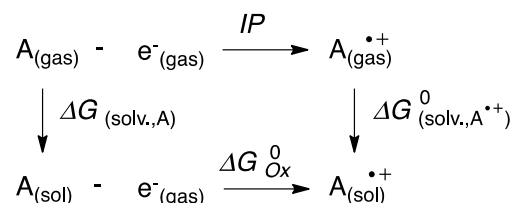

scheme 1

In some cases the  $\Delta\Delta G_{(\text{Solv})}^0$  was calculated over the gas phase geometries, in other cases different solvent models were employed to improve its quality and hence the  $\Delta G_{\text{Ox}}^0$ . In the present work the  $\Delta G_{\text{Ox}}^0$  was directly calculated from the optimized geometries in solvent by employing the IEF-PCM continuum solvation model,<sup>1</sup> including the thermal corrections and the changes in enthalpy and entropy.

Finally, the  $\Delta G_{\text{Ox}}^0$  is related to the redox potential,  $E_{\text{Ox}}^0$ , by the Faraday's equation:

$$E_{\text{Ox}}^0 = -\Delta G_{\text{Ox}}^0 / nF$$

where  $n$  is the number of electrons transferred (in this case is equal to 1) and  $F$  is the Faraday constant (96485 C mol<sup>-1</sup> or 23.061 kcal mol<sup>-1</sup> V<sup>-1</sup>). It should be noted that the  $E_{\text{Ox}}^0$  represents the absolute value of half of the redox reaction, a hemi-couple, whereas the experimental values ( $E_{\text{Ox,Exp}}^0$ ) are relative to a reference hemi-couple where the oxidation takes place  $E_{\text{Reference}}^0$ , i.e.  $H^+/H_2$ , ferricenium/ferrocene (II/III), Ag/Ag<sup>+</sup>, Hg/Hg<sup>+2</sup> (Saturated Calomel Electrode, SCE); according to the following equation:

$$E_{\text{Ox,Exp}}^0 = E_{\text{Ox}}^0 - E_{\text{Reference}}^0$$

Because of that, the difference between the computed and the experimental values corresponds to the absolute value of the oxidation potential of the reference electrode ( $E_{\text{Reference}}^0$ ). If all the experimental values are compared to the  $H^+/H_2$  reference the  $E_{\text{Reference}}^0$  recommended is 4.44 V in water<sup>2</sup> and 4.48 V in acetonitrile.<sup>3</sup> The usual procedure is to subtract this experimental value to the computed  $E_{\text{Ox}}^0$  in order to get a computed value comparable with the  $E_{\text{Ox,Exp}}^0$ .

### References:

- 1-J. Tomasi, B. Mennucci and R. Cammi, *Chem. Rev.*, 2005, **105**, 2999-3093.
- 2-S. Trasatti, *Pure Appl. Chem.*, 1986, **58**, 955-966.
- 3-This is a computed value. C.P. Kelly, C.J. Cramer, and D.G. Truhlar, *J. Phys. Chem. B*, 2007, **111**, 408-422.

### 7. Name of the compounds used as references in theoretical studies by aromatic oxidative coupling.

| Compound Number | Compound Name                                                                           | Oxidation Potential (eV) | Ref. |
|-----------------|-----------------------------------------------------------------------------------------|--------------------------|------|
| <b>Group 1</b>  |                                                                                         |                          |      |
| <b>10</b>       | 1,2-bis(3,4-dimethoxyphenyl) ethane-1,2-dione                                           | 4.91                     | [4]  |
| <b>11</b>       | <i>N</i> -benzyl-3,4-dimethoxyaniline                                                   | 4.98                     | [4]  |
| <b>12</b>       | 3-(naphthalen-1-yl) perylene                                                            | 5.34                     | [5]  |
| <b>13</b>       | 3,3'',4,4''-tetramethoxy-1,1':2',1''-terphenyl                                          | 5.48                     | [4]  |
| <b>14</b>       | 6-methoxy-2-methyl-1-(3,4,5-trimethoxyphenethyl)-1,2,3,4-tetrahydroisoquinolin-7-ol     | 5.42                     | [4]  |
| <b>15</b>       | 4,5-bis(3,4-dimethoxyphenyl) isoxazole                                                  | 5.79                     | [4]  |
| <b>16</b>       | 4,4',5''',4''''-tetra- <i>tert</i> -butyl-1,1':2',1'':4'',1''':2''',1''''-quinquephenyl | 5.86                     | [4]  |
| DDQ             | 2,3-dichloro-5,6-dicyanobenzoquinone                                                    | 5.74                     |      |

| Compound Number | Compound Name                                                   | Oxidation Potential (eV) | Ref. |
|-----------------|-----------------------------------------------------------------|--------------------------|------|
| <b>Group 2</b>  |                                                                 |                          |      |
| <b>17</b>       | 2,2''-dimethoxy-1,1':2',1''-terphenyl                           | 5.67                     | [4]  |
| <b>18</b>       | dimethyl 2,2'-dihydroxy-[1,1'-binaphthalene]-3,3'-dicarboxylate | 5.81                     | [6]  |
| <b>19</b>       | [1,1'-binaphthalene]-2,2'-diol                                  | 5.90                     | [4]  |
| <b>20</b>       | 1,1'-binaphthalene                                              | 5.97                     | [4]  |
| <b>21</b>       | 6,6'-dibromo-[1,1'-binaphthalene]-2,2'-diol                     | 6.02                     | [6]  |
| <b>22</b>       | 7-hydroxy-4-(naphthalen-1-yl)-2H-chromen-2-one                  | 6.22                     | [4]  |
| <b>23</b>       | 2,2''-dibromo-1,1':2',1''-terphenyl                             | 6.51                     | [4]  |
| <b>24</b>       | 3,3''-dinitro-1,1':2',1''-terphenyl                             | 6.71                     | [7]  |
| <b>8</b>        | 1-(naphthalen-1-yl) isoquinoline                                | 6.61                     | [4]  |
| <b>9</b>        | 8-(naphthalen-1-yl) isoquinoline                                | 6.85                     | [4]  |

#### References:

- 4- M. Grzybowski, K. Skonieczny, H. Butenschön, D. T. Gryko, *Angew. Chem., Int. Ed.*, 2013, **52**, 9900-9930.  
 5- Y. Avlasevich, C. Kohl, K. Müllen, *J. Mater. Chem.*, 2006, **16**, 1053-1057.  
 6- A. A. O. Sarhanw, C. Bolm, *Chem. Soc. Rev.*, 2009, **38**, 2730-2744.  
 7- B. T. King, J. Kroulík, C. R. Robertson, P. Rempala, C. L. Hilton, J. D. Korinek, L. M. Gortari, *J. Org. Chem.*, 2007, **72**, 2279-2288.

## 8. Formation of Terrylene: study of Scholl reaction.

 8.1. Calculated energies for the first cyclization step from isomers  $\sigma_4$  and  $\sigma_5$  of protonated 25.
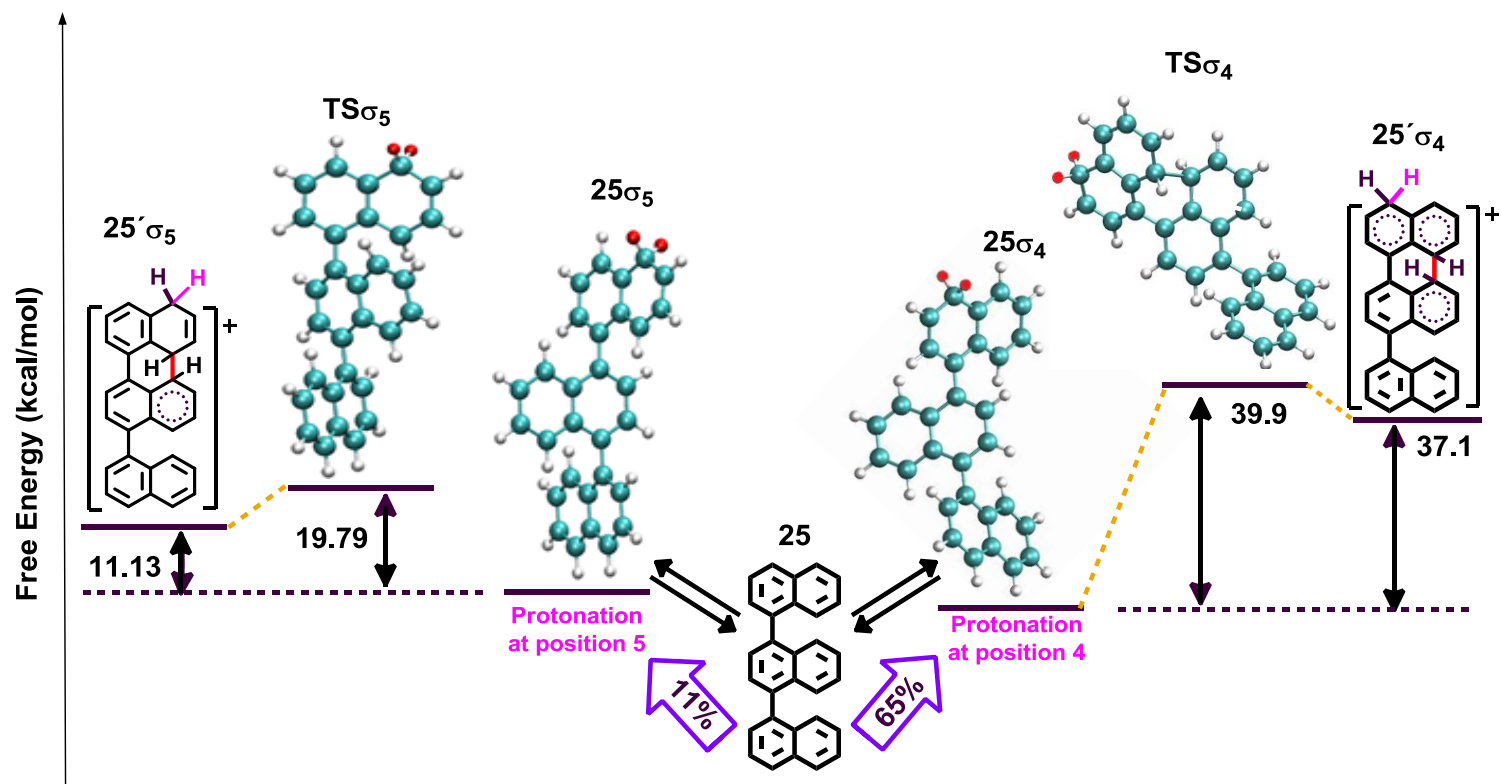

In red are represented both hydrogens at position 5, that originally formed  $25\sigma_5$  complex.

8.2 Calculated energies involved in both ring closures of  $25\sigma$  by the Scholl mechanism,  $\sigma$ -complex generated in position 5.

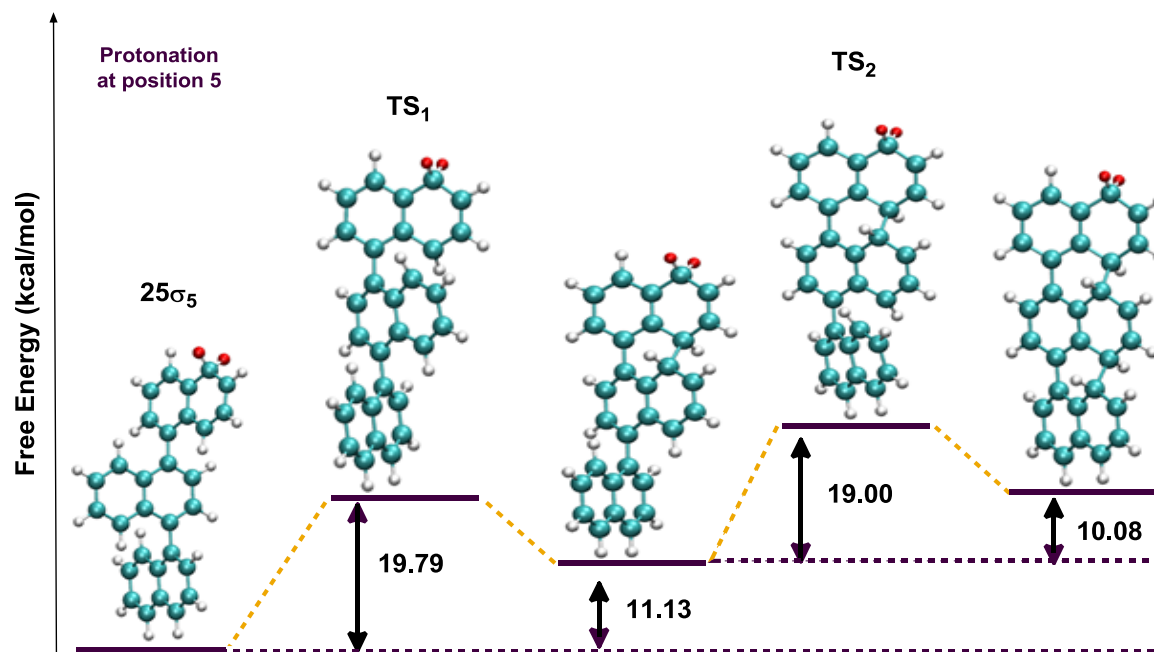

Double cyclization of the substrate 1,1':4',1''-ternaphthalene by Scholl mechanism.  $25\sigma_5$  is the  $\sigma$ -complex of **25** after protonation at C-5,  $TS_1$  and  $TS_2$  are the transition states for each cyclization step. In red are represented both hydrogens at position 5.

9- *Electrostatic potential isosurface of 25 $\sigma$  and the intermediary product of cyclization to afford terrylene.*

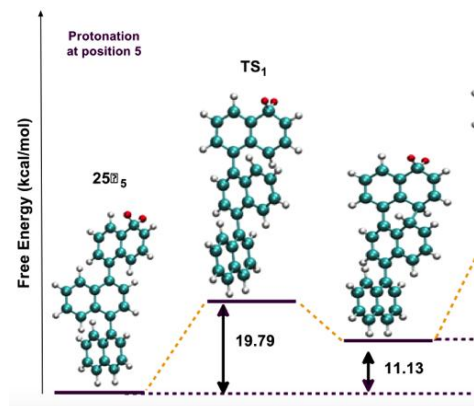

0.10

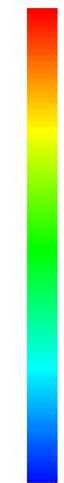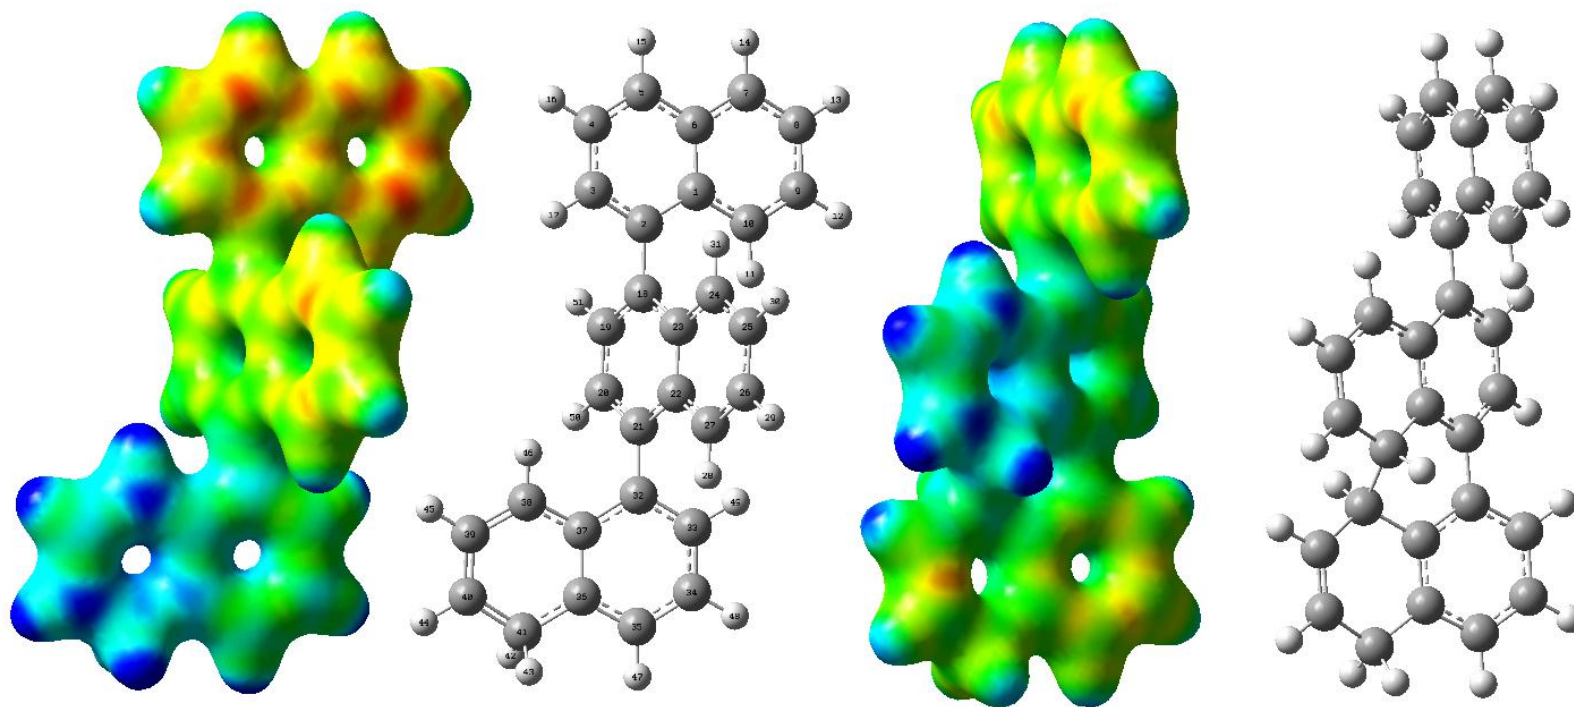

## 10. XYZ Coordinates of the computed compounds

### 1a-sigma-1'.xyz

38

-826.465870231

|   |                 |                 |                 |
|---|-----------------|-----------------|-----------------|
| C | -0.022629446688 | -0.180555373409 | -0.027340912632 |
| C | -0.065290512103 | -0.128727370202 | 1.387773909520  |
| C | 1.157530273949  | -0.029456579044 | 2.125659943529  |
| C | 2.410874767581  | 0.016308538320  | 1.425396232187  |
| C | 2.373463084687  | -0.032050343765 | 0.045557797394  |
| C | 1.174354583554  | -0.131723271319 | -0.691164980600 |
| C | 1.077308223170  | 0.020149414244  | 3.541588377941  |
| C | -0.137001927535 | -0.032739760952 | 4.190033115111  |
| C | -1.339843295889 | -0.134264443308 | 3.456687602877  |
| C | -1.301266097920 | -0.180406148044 | 2.082157803047  |
| C | 3.697075277908  | 0.089142131792  | 2.243063568489  |
| C | 3.930465414572  | 1.384544282456  | 2.978024582440  |
| C | 4.613137522426  | 1.351099040826  | 4.233779885594  |
| C | 4.946791477558  | 0.113182832203  | 4.812275774467  |
| C | 4.611443193970  | -1.124534425656 | 4.230241157639  |
| C | 3.964844080385  | -1.146972676488 | 3.025829267653  |
| C | 4.915221702758  | 2.561727199839  | 4.912851015174  |
| C | 4.542206821520  | 3.770204475708  | 4.363772894228  |
| C | 3.866078240994  | 3.790480538505  | 3.131522990000  |
| C | 3.568022811188  | 2.614570777734  | 2.442019129304  |
| N | 3.592739017609  | 0.018989816896  | -0.786633098728 |
| H | 4.460158988128  | 0.142778084636  | -0.259146681284 |
| H | 3.554536236241  | 0.796561721842  | -1.456568035691 |
| H | 3.707904510098  | -0.842156756953 | -1.334926856136 |
| H | 4.570335408929  | 0.041253703915  | 1.559213247177  |
| H | 3.041371914895  | 2.669047724596  | 1.494174339593  |
| H | 3.564183545481  | 4.742535808659  | 2.703940263345  |
| H | 4.764654800181  | 4.700654138748  | 4.876218837323  |
| H | 5.437439340457  | 2.516551641795  | 5.864395439045  |
| H | 5.469014601824  | 0.116366106324  | 5.766416324550  |
| H | 4.857364779936  | -2.047581309470 | 4.743981718612  |
| H | 3.701314276525  | -2.091158413518 | 2.555949486233  |
| H | -2.219350808214 | -0.258376713075 | 1.505233099023  |
| H | -2.290892473209 | -0.174387545761 | 3.980298310108  |
| H | -0.167252546058 | 0.007398606107  | 5.275287488531  |
| H | 1.978083615921  | 0.107815043473  | 4.139786645072  |
| H | 1.206698085662  | -0.172234991387 | -1.776149522508 |
| H | -0.950490465695 | -0.260448360181 | -0.586635555548 |

### 1a-sigma-1.xyz

38

-826.460515448

|   |                 |                 |                 |
|---|-----------------|-----------------|-----------------|
| C | 0.005395932161  | -0.328469639787 | -0.036152584321 |
| C | -0.068140601461 | -0.193720119608 | 1.350171989328  |
| C | 1.126809597869  | 0.072281940321  | 2.098449100713  |
| C | 2.461675476294  | 0.088616961006  | 1.402937619198  |
| C | 2.359147806420  | 0.043005063471  | -0.080935175643 |



|   |                 |                 |                 |
|---|-----------------|-----------------|-----------------|
| C | 1.214648713526  | -0.191786842977 | -0.766240738530 |
| C | 1.032287096801  | 0.240340473344  | 3.472555437495  |
| C | -0.212194055874 | 0.153326150748  | 4.099290678031  |
| C | -1.392000060654 | -0.110796942125 | 3.377189512918  |
| C | -1.325618095139 | -0.285008287945 | 2.014174462892  |
| C | 3.479988808626  | 1.097533102038  | 1.936315901422  |
| C | 3.236455143667  | 2.505962691706  | 1.841480209504  |
| C | 4.225263549832  | 3.399457463910  | 2.370642339133  |
| C | 5.401511372270  | 2.873081181315  | 2.967069479475  |
| C | 5.609160378730  | 1.516814710881  | 3.039643135903  |
| C | 4.641609236407  | 0.627501446486  | 2.520264258434  |
| C | 4.008577104835  | 4.799702139534  | 2.287326126871  |
| C | 2.868276041657  | 5.306554611678  | 1.706192191940  |
| C | 1.892724968881  | 4.427754753675  | 1.183495857002  |
| C | 2.072263020324  | 3.063187523023  | 1.252298208811  |
| N | 3.623767929259  | 0.149256085371  | -0.809050876218 |
| H | 4.317374249657  | 0.683587939033  | -0.264114964690 |
| H | 4.033987606167  | -0.778801882727 | -0.992007215257 |
| H | 3.514529249408  | 0.615073583837  | -1.718665639040 |
| H | 2.885632925749  | -0.910694012396 | 1.646192952221  |
| H | 1.297986177623  | 2.415000735353  | 0.851030147449  |
| H | 0.992088720376  | 4.829927887682  | 0.727607816202  |
| H | 2.713610070313  | 6.380551430749  | 1.648922100968  |
| H | 4.764680057385  | 5.468193447820  | 2.692456520352  |
| H | 6.139730640189  | 3.564894425660  | 3.365662676967  |
| H | 6.509672653160  | 1.117090773021  | 3.496473129651  |
| H | 4.817620630602  | -0.443456652029 | 2.592494561611  |
| H | -2.217592116651 | -0.489773484510 | 1.429448327189  |
| H | -2.342547602418 | -0.174502153220 | 3.896452627697  |
| H | -0.268971486030 | 0.295503462889  | 5.174810866756  |
| H | 1.920802697752  | 0.445720299985  | 4.061333340974  |
| H | 1.195356859130  | -0.277999535133 | -1.847618595075 |
| H | -0.904138226080 | -0.531900482388 | -0.595921493932 |

### 1a-sigma-2'.xyz

38

-826.471109032

|   |                 |                 |                 |
|---|-----------------|-----------------|-----------------|
| C | -0.007839597447 | -0.038652089585 | -0.006179893216 |
| C | -0.076440587113 | 0.032007600389  | 1.407204762636  |
| C | 1.131906757212  | 0.022455688031  | 2.174072203217  |
| C | 2.392089679165  | -0.039727644277 | 1.489881565225  |
| C | 2.385403961213  | -0.122332258927 | 0.110672350387  |
| C | 1.201013144248  | -0.120009348565 | -0.650059843199 |
| C | 1.039002608763  | 0.052802086074  | 3.590696661930  |
| C | -0.188323777712 | 0.118786538454  | 4.212259534846  |
| C | -1.380539315907 | 0.149926078699  | 3.453452763599  |
| C | -1.324073827591 | 0.101828246750  | 2.079568539032  |
| C | 3.648141260438  | 0.028828416296  | 2.287519574742  |
| C | 4.372159055679  | -1.104185497640 | 2.634524199638  |
| C | 5.590366905469  | -0.954563560818 | 3.417455870794  |
| C | 6.029932770484  | 0.337751809954  | 3.845397590341  |
| C | 5.316431164988  | 1.447096292002  | 3.537991285386  |
| C | 4.089234058654  | 1.367764127300  | 2.729084152743  |
| C | 6.314137793269  | -2.109061168622 | 3.755132897445  |

|   |                 |                 |                 |
|---|-----------------|-----------------|-----------------|
| C | 5.866290450115  | -3.358873563969 | 3.364420593679  |
| C | 4.668746947931  | -3.520619092806 | 2.622010607581  |
| C | 3.935760833309  | -2.422248663228 | 2.263738338399  |
| N | 3.645154518372  | -0.170601913286 | -0.657392731940 |
| H | 3.622980923614  | -0.914050002041 | -1.365502816236 |
| H | 4.472702846225  | -0.352022126455 | -0.079963003279 |
| H | 3.819234072421  | 0.711159448387  | -1.156404729074 |
| H | 4.195737167741  | 2.020733900201  | 1.841568592392  |
| H | 3.250531028868  | 1.871651160146  | 3.244400210963  |
| H | 3.011732708186  | -2.536020025127 | 1.705664993407  |
| H | 4.337068376763  | -4.516362535422 | 2.346201873307  |
| H | 6.440008953640  | -4.239498804014 | 3.639575551277  |
| H | 7.227651849076  | -2.012674497730 | 4.333894750727  |
| H | 6.941072473129  | 0.405192292219  | 4.432373809696  |
| H | 5.634929333928  | 2.430768198503  | 3.869721563770  |
| H | -2.235266139725 | 0.112788180840  | 1.486850693658  |
| H | -2.340409222473 | 0.204230247240  | 3.959351831851  |
| H | -0.239420455189 | 0.141593901971  | 5.297250305582  |
| H | 1.937004097790  | 0.008670040232  | 4.200042231631  |
| H | 1.250336347177  | -0.175648328678 | -1.733678328138 |
| H | -0.927758909587 | -0.032421431373 | -0.583797391985 |

### 1a-sigma-3'.xyz

38

-826.477509893

|   |                 |                 |                 |
|---|-----------------|-----------------|-----------------|
| C | 0.002016831756  | 0.029144018622  | -0.021167701059 |
| C | -0.063345250272 | 0.037584627102  | 1.395611415941  |
| C | 1.147847413596  | -0.008155816824 | 2.157612685125  |
| C | 2.405574040437  | -0.050494605014 | 1.472913502172  |
| C | 2.392389130461  | -0.060445623801 | 0.093796583649  |
| C | 1.210017460220  | -0.021290432696 | -0.670421132537 |
| C | 1.061182703318  | -0.012148236754 | 3.574714507974  |
| C | -0.163571587739 | 0.035792346229  | 4.203733314844  |
| C | -1.358982619568 | 0.087157534766  | 3.450360093859  |
| C | -1.308436360441 | 0.085382837280  | 2.074859017447  |
| C | 3.682538076066  | -0.092085557187 | 2.249090508032  |
| C | 4.259046206375  | 1.141056690746  | 2.761459599230  |
| C | 5.483031537159  | 1.098749898083  | 3.534728888718  |
| C | 6.093633449440  | -0.114647611358 | 3.774906078798  |
| C | 5.545687423257  | -1.370327807267 | 3.275434907277  |
| C | 4.295188538856  | -1.278842055301 | 2.499147012421  |
| C | 6.055649695860  | 2.307371788056  | 4.042464942062  |
| C | 5.448531712733  | 3.513881101061  | 3.799199070799  |
| C | 4.257016737833  | 3.545981887035  | 3.042202775128  |
| C | 3.673529156249  | 2.390662657341  | 2.533248494781  |
| N | 3.662533489229  | -0.090712446160 | -0.653407159576 |
| H | 4.467474703734  | -0.243240617440 | -0.034715628811 |
| H | 3.831401717111  | 0.787493346114  | -1.158515898341 |
| H | 3.676975107909  | -0.845015791226 | -1.349430536283 |
| H | 6.330696150610  | -1.892777371558 | 2.694660683537  |
| H | 5.422434072555  | -2.066358181155 | 4.127940479304  |
| H | 2.758770700333  | 2.465815519503  | 1.954669991680  |
| H | 3.779664850605  | 4.502778400856  | 2.849015224237  |
| H | 5.874185388358  | 4.436722016369  | 4.179265909543  |

|   |                 |                 |                 |
|---|-----------------|-----------------|-----------------|
| H | 6.974591731885  | 2.246384194645  | 4.618255991600  |
| H | 7.014035288166  | -0.153583609640 | 4.353138242096  |
| H | 3.864844367285  | -2.207364895688 | 2.133477542302  |
| H | -2.222944889833 | 0.120246374567  | 1.487788407574  |
| H | -2.317162167859 | 0.125285394835  | 3.961399306353  |
| H | -0.211484532051 | 0.032409659903  | 5.289336697408  |
| H | 1.968090039745  | -0.059452832316 | 4.170018173181  |
| H | 1.260397757523  | -0.028701144917 | -1.755382762849 |
| H | -0.919654895413 | 0.061548863165  | -0.595590483097 |

### 1a-sigma-3.xyz

38

-826.469794054

|   |                |                 |                 |
|---|----------------|-----------------|-----------------|
| C | 3.583513832218 | -0.213746699087 | 0.309818291737  |
| C | 3.789481584731 | -0.334562535489 | -1.090281632536 |
| C | 3.345467206658 | -1.445605963079 | -1.773605521284 |
| C | 2.678844968291 | -2.490527942317 | -1.092328589964 |
| C | 2.470705800956 | -2.405666922585 | 0.265936463458  |
| C | 2.913953803737 | -1.274642007777 | 1.001145516774  |
| C | 2.709132276990 | -1.177383803903 | 2.402809009717  |
| C | 3.145117427878 | -0.079573019608 | 3.106977710386  |
| C | 3.800543437016 | 0.976659896142  | 2.434928469629  |
| C | 4.018210663856 | 0.920541593375  | 1.069134189468  |
| C | 4.688136189084 | 2.070734334614  | 0.393318889739  |
| C | 4.520788037475 | 4.198209705400  | -0.951916963701 |
| C | 3.731217816228 | 5.183922194783  | -1.622256673472 |
| C | 2.361425534588 | 5.075850216161  | -1.634270612572 |
| C | 1.751794096209 | 3.987538262262  | -0.978956882443 |
| C | 2.494006842744 | 3.007794829907  | -0.318619212936 |
| C | 3.884947454015 | 3.080670940030  | -0.289364870794 |
| C | 6.030360540250 | 2.231802100085  | 0.410333464365  |
| C | 6.749794989738 | 3.351625173956  | -0.232638923978 |
| C | 5.892208031395 | 4.315230661675  | -0.919324097178 |
| N | 6.867012322256 | 1.239738334188  | 1.091310094233  |
| H | 7.503134218756 | 2.991359656079  | -0.959042811961 |
| H | 7.370984894458 | 3.912728298711  | 0.491034168924  |
| H | 4.307246136276 | 0.453760252055  | -1.630355078543 |
| H | 3.510713965744 | -1.521032706258 | -2.845151416751 |
| H | 2.334509497230 | -3.360788263693 | -1.644721372163 |
| H | 1.962732495203 | -3.206867422985 | 0.797870881411  |
| H | 2.200183246802 | -1.991250135704 | 2.914140328412  |
| H | 2.986195671121 | -0.011630164623 | 4.179243158765  |
| H | 4.125209163195 | 1.849552031848  | 2.996169710260  |
| H | 4.234182562106 | 6.012485949866  | -2.112007028689 |
| H | 1.750645578178 | 5.818145039204  | -2.137065424994 |
| H | 0.668452383604 | 3.906223734864  | -0.985340222986 |
| H | 1.980515100009 | 2.189937142519  | 0.174621247101  |
| H | 6.382467897952 | 5.152527227908  | -1.409854086702 |
| H | 7.526180286403 | 0.777224509586  | 0.452120835743  |
| H | 7.425891432580 | 1.650383125795  | 1.850573298425  |
| H | 6.279395704067 | 0.506014766092  | 1.512675405103  |

### 1a-sigma-4'.xyz

38

-826.478273939

|   |                 |                 |                 |
|---|-----------------|-----------------|-----------------|
| C | 0.024932660000  | -0.023145791354 | -0.012341098254 |
| C | -0.042001714824 | 0.036572878591  | 1.401850546581  |
| C | 1.167206572261  | 0.026266522189  | 2.168124440903  |
| C | 2.423502757634  | -0.037014707855 | 1.479680937027  |
| C | 2.416903566708  | -0.104854897693 | 0.101352670995  |
| C | 1.233283504781  | -0.091564855271 | -0.659538454506 |
| C | 1.078310621968  | 0.067681385596  | 3.584625763088  |
| C | -0.148287660684 | 0.130899056465  | 4.207675656807  |
| C | -1.342167172163 | 0.152435293905  | 3.450653574736  |
| C | -1.288570736730 | 0.103680588552  | 2.076703326479  |
| C | 3.688879953914  | -0.078718391892 | 2.266366637873  |
| C | 4.247872439499  | 1.113514270363  | 2.801302612685  |
| C | 5.451909038697  | 1.030513616746  | 3.569399807143  |
| C | 6.093637689762  | -0.289484309472 | 3.798826284761  |
| C | 5.448167742229  | -1.451612737773 | 3.190321230444  |
| C | 4.296025932483  | -1.342959329117 | 2.456647998068  |
| C | 6.007525887436  | 2.198289935575  | 4.088885903378  |
| C | 5.396433636924  | 3.426286295257  | 3.858987080913  |
| C | 4.214973498044  | 3.520058351425  | 3.098990262980  |
| C | 3.645748109704  | 2.381368983867  | 2.574052014950  |
| N | 3.681446045320  | -0.139656225367 | -0.658531967871 |
| H | 4.506427807007  | -0.300927634552 | -0.071059063267 |
| H | 3.844706658676  | 0.742158958849  | -1.160441434492 |
| H | 3.676721224027  | -0.887158276810 | -1.362469332601 |
| H | 6.195289635857  | -0.486832965496 | 4.882687259663  |
| H | 7.150935316756  | -0.270154747930 | 3.476565678807  |
| H | 2.738927231032  | 2.446097191684  | 1.981682487119  |
| H | 3.757593998869  | 4.489042626293  | 2.925739284832  |
| H | 5.841543148648  | 4.328189006133  | 4.269649494458  |
| H | 6.921594652120  | 2.146045418098  | 4.673689543943  |
| H | 5.904505568251  | -2.425300439291 | 3.347583485641  |
| H | 3.825852815352  | -2.225214246792 | 2.033502642737  |
| H | -2.201076057472 | 0.114664561166  | 1.485938851924  |
| H | -2.301330975208 | 0.204794702187  | 3.958194817402  |
| H | -0.198041894216 | 0.163885213843  | 5.292513497231  |
| H | 1.980448212183  | 0.047715419866  | 4.188724663604  |
| H | 1.282255859641  | -0.128966409285 | -1.743877812307 |
| H | -0.895886895381 | -0.012959625742 | -0.588518626156 |

### 1a-sigma-4.xyz

38

-826.474406779

|   |                |                 |                 |
|---|----------------|-----------------|-----------------|
| C | 3.664891959549 | -0.296981411727 | 0.197093447864  |
| C | 3.903461392392 | -0.656289048642 | 1.548398885294  |
| C | 3.786892610920 | -1.971466515213 | 1.959123429553  |
| C | 3.393638594909 | -2.975225944992 | 1.049623425800  |
| C | 3.102083045187 | -2.644075359914 | -0.256697446261 |
| C | 3.223859598187 | -1.307698726872 | -0.713630157680 |
| C | 2.888525180347 | -0.950901699631 | -2.045652240701 |
| C | 2.960611043242 | 0.358011845041  | -2.471445524430 |
| C | 3.395665764543 | 1.362220485549  | -1.589495187072 |

|   |                |                 |                 |
|---|----------------|-----------------|-----------------|
| C | 3.788795139394 | 1.049331291739  | -0.287290133239 |
| C | 4.409967830828 | 2.113797038087  | 0.502831067909  |
| C | 4.387718347356 | 4.419731281992  | 1.401812512813  |
| C | 3.692725796720 | 5.599852159494  | 1.650763095540  |
| C | 2.350152949612 | 5.712651808229  | 1.301034663239  |
| C | 1.664399923207 | 4.634262155374  | 0.717214072343  |
| C | 2.330239060000 | 3.454344607003  | 0.463015481728  |
| C | 3.714285983766 | 3.329694549790  | 0.769246925007  |
| C | 5.767896833452 | 1.980711602132  | 0.948484597466  |
| C | 6.445793224561 | 2.994592903888  | 1.539459825598  |
| C | 5.813770202332 | 4.289910472186  | 1.802047131775  |
| N | 6.504019142815 | 0.751380780310  | 0.618073497492  |
| H | 5.935730289529 | 4.525713970711  | 2.873514203853  |
| H | 6.430930861199 | 5.064939767900  | 1.313790525470  |
| H | 4.124967261856 | 0.112019873757  | 2.287264613233  |
| H | 3.978814245652 | -2.227604976147 | 2.997246001473  |
| H | 3.299797841385 | -4.003244946035 | 1.387194653057  |
| H | 2.764017585586 | -3.405084724488 | -0.955464473310 |
| H | 2.561795443798 | -1.730999495866 | -2.728710403005 |
| H | 2.698803311650 | 0.622412805065  | -3.491254578995 |
| H | 3.496314495221 | 2.381964169910  | -1.949377551803 |
| H | 4.202592564243 | 6.433879446720  | 2.124871545242  |
| H | 1.821876149518 | 6.640107764751  | 1.503200723367  |
| H | 0.607897737271 | 4.723308877031  | 0.485005161754  |
| H | 1.792398010550 | 2.607227815972  | 0.053189782645  |
| H | 7.496414154265 | 2.890071391504  | 1.799275333712  |
| H | 7.448307473511 | 0.762058983591  | 1.019337801096  |
| H | 6.612050612070 | 0.630656963417  | -0.397724563504 |
| H | 6.033434889377 | -0.095889301619 | 0.974685405680  |

### 1a-sigma-5'.xyz

38

-826.482838884

|   |                 |                 |                 |
|---|-----------------|-----------------|-----------------|
| C | 0.070192157358  | 0.286383891279  | 0.076908016632  |
| C | 0.004964907396  | 0.114738203553  | 1.483981633025  |
| C | 1.217964192132  | 0.103619708622  | 2.244422184282  |
| C | 2.452744337136  | 0.252389108208  | 1.559033188828  |
| C | 2.481447039976  | 0.414622595247  | 0.191239897898  |
| C | 1.282421114910  | 0.435626736275  | -0.557553329498 |
| C | -1.237116298655 | -0.051126047693 | 2.148007804582  |
| C | -1.291724202438 | -0.226956566338 | 3.508012582586  |
| C | -0.089964360572 | -0.234316088182 | 4.242962748903  |
| C | 1.151651003219  | -0.064475493420 | 3.666397404199  |
| C | 2.405143559976  | -0.080998124193 | 4.477204847030  |
| C | 2.981147728959  | -1.285146125524 | 4.842952434031  |
| C | 4.180548924833  | -1.312907426807 | 5.581116983151  |
| C | 4.822919447349  | -0.141254462200 | 5.953186833276  |
| C | 4.272600358898  | 1.092881987822  | 5.602761817400  |
| C | 3.053276828181  | 1.136608677068  | 4.866658973573  |
| C | 4.940610225722  | 2.365352683609  | 5.985472446991  |
| C | 4.278974527007  | 3.612724377817  | 5.596598678909  |
| C | 3.098366069712  | 3.619947135697  | 4.899263549471  |
| C | 2.505451524419  | 2.398360295668  | 4.543346348183  |

|   |                 |                 |                 |
|---|-----------------|-----------------|-----------------|
| N | -0.201260755918 | -0.414731048088 | 5.701682572702  |
| H | -0.856780954132 | 0.295490610671  | -0.491086949171 |
| H | 1.322127606930  | 0.565843860705  | -1.635543074084 |
| H | 3.435431351316  | 0.525250117650  | -0.317139371344 |
| H | 3.385145736299  | 0.229523143923  | 2.115217869647  |
| H | -2.244048407548 | -0.355127458173 | 4.014534327383  |
| H | -2.154838493136 | -0.040919655754 | 1.566439067062  |
| H | 1.569404932703  | 2.427819978489  | 3.990722957204  |
| H | 2.617832403193  | 4.550891587054  | 4.618700559473  |
| H | 4.759408178280  | 4.545856953803  | 5.878861342860  |
| H | 5.972220656656  | 2.387924836754  | 5.586816230465  |
| H | 5.751208823514  | -0.181034544472 | 6.515862886472  |
| H | 4.610577821682  | -2.272279863574 | 5.853839296626  |
| H | 2.512512969890  | -2.219727459533 | 4.547867262542  |
| H | -0.740116109115 | -1.255287066512 | 5.941764789783  |
| H | 0.718633957330  | -0.515394772597 | 6.146610315589  |
| H | 5.121810480665  | 2.393742027581  | 7.075392432907  |
| H | -0.668102645541 | 0.380839624235  | 6.153757712428  |

### 1a-sigma-5.xyz

38

-826.478780312

|   |                 |                 |                 |
|---|-----------------|-----------------|-----------------|
| C | 0.042442891789  | 0.276257262416  | 0.081579743170  |
| C | 0.002080087394  | 0.100727206181  | 1.556632081849  |
| C | 1.219136425977  | 0.054265185679  | 2.289365124637  |
| C | 2.441173009362  | 0.165744646541  | 1.582565393109  |
| C | 2.520289057113  | 0.327689399768  | 0.192819690040  |
| C | 1.361932870954  | 0.382544759230  | -0.542081691983 |
| C | -1.214116639005 | -0.023891787296 | 2.230658110327  |
| C | -1.226104005697 | -0.197126413549 | 3.603712555118  |
| C | -0.019057668596 | -0.242455674104 | 4.315169857549  |
| C | 1.217151796301  | -0.115472757109 | 3.710511516378  |
| C | 2.486103437824  | -0.166542322172 | 4.493588884989  |
| C | 3.044752788118  | -1.396336931093 | 4.797970621247  |
| C | 4.250019274245  | -1.481710436425 | 5.530776907459  |
| C | 4.884303346213  | -0.335572085458 | 5.949316483861  |
| C | 4.344184101823  | 0.944949644288  | 5.659636479164  |
| C | 3.121906338660  | 1.044882957854  | 4.918970889189  |
| C | 4.990104426187  | 2.134317050830  | 6.088709415705  |
| C | 4.455250979647  | 3.370450622971  | 5.803764680758  |
| C | 3.247146143083  | 3.468773403767  | 5.074919304792  |
| C | 2.595034345796  | 2.334876602276  | 4.642051255136  |
| N | -0.087516989987 | -0.424382778510 | 5.771817175313  |
| H | -0.515590401415 | -0.535814558230 | -0.419661969569 |
| H | 1.398597175678  | 0.508507088533  | -1.620897203970 |
| H | 3.491053454291  | 0.405859213259  | -0.284130330770 |
| H | 3.367023203351  | 0.117261191057  | 2.150208869467  |
| H | -2.171832099243 | -0.297561008632 | 4.128736292511  |
| H | -2.151001839988 | 0.010111084789  | 1.683534654693  |
| H | 1.665895732484  | 2.431689505001  | 4.086601449931  |
| H | 2.828854058425  | 4.447615083537  | 4.855556656589  |
| H | 4.958270206633  | 4.273802370515  | 6.138312721693  |
| H | 5.918021626591  | 2.050007752873  | 6.649761954916  |
| H | 5.813223327808  | -0.395835757493 | 6.511637640096  |

|   |                 |                 |                 |
|---|-----------------|-----------------|-----------------|
| H | 4.669284201481  | -2.458482550538 | 5.754077963015  |
| H | 2.556456016637  | -2.307589202932 | 4.461143561271  |
| H | -0.608907738834 | -1.270093969963 | 6.033341263585  |
| H | -0.539925992461 | 0.369937573556  | 6.240724674764  |
| H | -0.548003160751 | 1.164572070489  | -0.212358770655 |
| H | 0.856833764759  | -0.517173809842 | 6.170420056510  |

**1a-sigma-6'.xyz**

38

-826.476906922

|   |                 |                 |                 |
|---|-----------------|-----------------|-----------------|
| C | 0.000769087414  | 0.050844006878  | -0.004190781635 |
| C | -0.054107295148 | -0.002404031201 | 1.411832520835  |
| C | 1.163812976545  | -0.034931633910 | 2.164178400979  |
| C | 2.418520877857  | -0.005436723698 | 1.471564452688  |
| C | 2.393980460705  | 0.041690386877  | 0.093192148064  |
| C | 1.205049330169  | 0.069600680897  | -0.661405679954 |
| C | 1.086429808295  | -0.099100358181 | 3.580478758821  |
| C | -0.135015776007 | -0.123672250475 | 4.217512119648  |
| C | -1.336654806705 | -0.086501236681 | 3.473652979772  |
| C | -1.295290786363 | -0.028380694502 | 2.099040981891  |
| C | 3.698887893871  | -0.050454883579 | 2.242493816444  |
| C | 4.262479067855  | 1.120929689819  | 2.804513108016  |
| C | 5.485474451279  | 0.989611029348  | 3.569008657161  |
| C | 6.099679519666  | -0.288900902396 | 3.745199854222  |
| C | 5.527781799919  | -1.404275536144 | 3.191146131324  |
| C | 4.331609268183  | -1.276015779384 | 2.451403041027  |
| C | 6.049065726830  | 2.118565161317  | 4.132518613950  |
| C | 5.454617840031  | 3.441691684691  | 3.985199287368  |
| C | 4.215712759187  | 3.520414668124  | 3.192185182137  |
| C | 3.661112595611  | 2.414539824932  | 2.639010063980  |
| N | 3.655752262488  | 0.061635464020  | -0.669927639375 |
| H | 3.793988478032  | -0.804767954716 | -1.203989889673 |
| H | 4.475744754981  | 0.172194752922  | -0.063533208603 |
| H | 3.678591113163  | 0.835178961172  | -1.344407937256 |
| H | 6.224142970070  | 4.132546602772  | 3.588755257688  |
| H | 5.301723235116  | 3.869451386454  | 4.995914494214  |
| H | 2.747990546852  | 2.494157316115  | 2.057892409988  |
| H | 3.755554697118  | 4.495452167808  | 3.064026001027  |
| H | 6.965663525190  | 2.032328468189  | 4.711542470062  |
| H | 7.016675512796  | -0.354831934253 | 4.323422035034  |
| H | 5.976794008463  | -2.383821976039 | 3.317134594407  |
| H | 3.881078236946  | -2.171091367342 | 2.029271833199  |
| H | -2.214292153606 | -0.003233992268 | 1.518526891824  |
| H | -2.292116881928 | -0.106840814931 | 3.990751382056  |
| H | -0.175006411955 | -0.173785779760 | 5.302276266487  |
| H | 1.998059910364  | -0.134687078220 | 4.169100135806  |
| H | 1.247771233573  | 0.108084609014  | -1.745944034042 |
| H | -0.925556252212 | 0.076062841793  | -0.571451365208 |

**1a-sigma-6.xyz**

38

-826.470060227

|   |                 |                 |                |
|---|-----------------|-----------------|----------------|
| C | -2.592935527703 | -0.526088850773 | 0.908535706380 |
| C | -3.855382620980 | -0.661553606108 | 1.545124559238 |

|   |                 |                 |                 |
|---|-----------------|-----------------|-----------------|
| C | -4.168296120070 | -1.801358589854 | 2.253392280371  |
| C | -3.238326577922 | -2.861622610699 | 2.357847836038  |
| C | -2.007484244510 | -2.761539614130 | 1.749080228864  |
| C | -1.651285999374 | -1.600788871307 | 1.012974343650  |
| C | -0.385062477195 | -1.485315619315 | 0.381140839392  |
| C | -0.049651938673 | -0.356738189366 | -0.329543829177 |
| C | -0.968945038756 | 0.711133288217  | -0.436815327811 |
| C | -2.214185072948 | 0.638411592101  | 0.164058981075  |
| C | -3.156661477268 | 1.789594607467  | 0.038305792596  |
| C | -4.191418811434 | 3.870926236220  | 0.869539466558  |
| C | -4.293141698378 | 4.840000975310  | 1.853431453744  |
| C | -3.482861784342 | 4.800487167030  | 3.061360597661  |
| C | -2.544844597865 | 3.675274856225  | 3.192031633580  |
| C | -2.447477903385 | 2.722944006426  | 2.229914775963  |
| C | -3.257988238637 | 2.783459531389  | 1.050171418917  |
| C | -3.962594077214 | 1.943688133949  | -1.080206072777 |
| C | -4.880996632600 | 2.993776703500  | -1.278716586538 |
| C | -4.996146379024 | 3.949693746226  | -0.306458705938 |
| N | -3.862816682767 | 0.940257769839  | -2.148244072152 |
| H | -4.156117175511 | 4.860832590199  | 3.939962242839  |
| H | -2.952815222061 | 5.769621512543  | 3.159080973870  |
| H | -4.585811271866 | 0.139831983851  | 1.473025606643  |
| H | -5.138923855799 | -1.887066195564 | 2.734832131719  |
| H | -3.499681076288 | -3.754782205845 | 2.919076231992  |
| H | -1.287556597076 | -3.573324349609 | 1.823521033140  |
| H | 0.319711212780  | -2.309080459183 | 0.467930935665  |
| H | 0.921197268767  | -0.274218133920 | -0.809483972893 |
| H | -0.688521293621 | 1.604554282367  | -0.989669475024 |
| H | -4.993732375886 | 5.662859651292  | 1.732603715699  |
| H | -1.927349064887 | 3.628673224097  | 4.083746284379  |
| H | -1.747869555822 | 1.901296660505  | 2.338861155770  |
| H | -5.482452264157 | 3.038298961549  | -2.180700448002 |
| H | -5.693884326746 | 4.773107048523  | -0.421123339722 |
| H | -3.581508463550 | 1.361877700231  | -3.042926893501 |
| H | -4.755113289773 | 0.455083376427  | -2.307199473097 |
| H | -3.158547767463 | 0.226287170187  | -1.912608989113 |

### 1a-sigma-7'.xyz

38

-826.476761971

|   |                 |                 |                 |
|---|-----------------|-----------------|-----------------|
| C | -0.004914774984 | 0.031963964776  | 0.008945478814  |
| C | -0.060584014869 | -0.025407416310 | 1.424578233756  |
| C | 1.156511517669  | -0.047644165252 | 2.178444919104  |
| C | 2.410175007271  | -0.002969302969 | 1.484900900751  |
| C | 2.388124368378  | 0.032452606424  | 0.105752189649  |
| C | 1.199475993035  | 0.056072784317  | -0.648552914572 |
| C | 1.079607457862  | -0.127501557041 | 3.594113384589  |
| C | -0.141886966701 | -0.173342741611 | 4.229263022162  |
| C | -1.343369089154 | -0.141475768068 | 3.484594412284  |
| C | -1.301926665716 | -0.070522416849 | 2.110775712274  |
| C | 3.690578109095  | -0.021612442338 | 2.250582244514  |
| C | 4.210279591462  | 1.187767451950  | 2.852320272078  |
| C | 5.437211784435  | 1.142451574563  | 3.620328588983  |



|   |                 |                 |                 |
|---|-----------------|-----------------|-----------------|
| C | 6.108397476411  | -0.086513687206 | 3.752382147498  |
| C | 5.596881858611  | -1.222060504596 | 3.157628565156  |
| C | 4.390210825908  | -1.194622110557 | 2.411807199012  |
| C | 5.957574484790  | 2.331542101986  | 4.229531000273  |
| C | 5.322586833140  | 3.521244406659  | 4.094878910035  |
| C | 4.079289370532  | 3.629865641932  | 3.313950106374  |
| C | 3.570438230452  | 2.403311568873  | 2.709259540231  |
| N | 3.651489813996  | 0.067681868778  | -0.653619385716 |
| H | 3.676069075144  | -0.660150619263 | -1.377166085891 |
| H | 4.469147226198  | -0.087807422633 | -0.052682377269 |
| H | 3.791552005409  | 0.968010518933  | -1.127731975168 |
| H | 3.269931231477  | 4.078387052976  | 3.923520183273  |
| H | 4.180007507797  | 4.395869797394  | 2.519798903875  |
| H | 2.654090587561  | 2.475832850382  | 2.128836108038  |
| H | 5.715601145405  | 4.421979418721  | 4.556457810380  |
| H | 6.877140039237  | 2.252510318617  | 4.801991475973  |
| H | 7.030412840445  | -0.134103300656 | 4.323696467351  |
| H | 6.121778646908  | -2.167023496335 | 3.264602589278  |
| H | 4.013648466878  | -2.117020038125 | 1.979018393135  |
| H | -2.220636571808 | -0.051944014315 | 1.529655627621  |
| H | -2.298756584228 | -0.177660310554 | 4.000850538955  |
| H | -0.182228210632 | -0.237480310517 | 5.313228460017  |
| H | 1.990858950402  | -0.161818262636 | 4.183676040425  |
| H | 1.241823764651  | 0.094084879518  | -1.733221679532 |
| H | -0.931088671666 | 0.051607133019  | -0.558674809339 |

### 1a-sigma-7.xyz

38

-826.471647950

|   |                 |                 |                 |
|---|-----------------|-----------------|-----------------|
| C | -2.497002646019 | -0.514517349676 | 0.886651500174  |
| C | -3.717299904143 | -0.718506310677 | 1.585058574257  |
| C | -3.932705468956 | -1.876239495119 | 2.300083218678  |
| C | -2.943116349926 | -2.885543399940 | 2.351176966217  |
| C | -1.752352930211 | -2.718593838298 | 1.680986437385  |
| C | -1.496695996964 | -1.538811071029 | 0.933458718429  |
| C | -0.275484704471 | -1.357364967339 | 0.232893204847  |
| C | -0.039318939217 | -0.213483596075 | -0.493135387533 |
| C | -1.017184665044 | 0.804710852320  | -0.547825265149 |
| C | -2.219613917936 | 0.667400158224  | 0.125310243565  |
| C | -3.225230655512 | 1.763676514352  | 0.041590114111  |
| C | -4.316914110620 | 3.821154026089  | 0.986328259470  |
| C | -4.426522332677 | 4.806372259770  | 2.019918498197  |
| C | -3.608564312401 | 4.774478265515  | 3.101085169888  |
| C | -2.580454236416 | 3.731080325145  | 3.240569301166  |
| C | -2.493270450408 | 2.740536811290  | 2.175153729467  |
| C | -3.335518859910 | 2.763801845569  | 1.079067893643  |
| C | -4.081863401926 | 1.882880874487  | -1.025168565010 |
| C | -5.040078977861 | 2.915932396479  | -1.131984366114 |
| C | -5.157803653117 | 3.865528392429  | -0.142137971533 |
| N | -4.017947814995 | 0.894996161528  | -2.109428203352 |
| H | -1.578049579591 | 4.183393724415  | 3.379283676039  |
| H | -2.687133215535 | 3.195265252767  | 4.204972599749  |
| H | -4.492113185820 | 0.043123052809  | 1.554394591556  |

|   |                 |                 |                 |
|---|-----------------|-----------------|-----------------|
| H | -4.871878468295 | -2.015911095169 | 2.828815576161  |
| H | -3.127505811432 | -3.792908011110 | 2.920042941197  |
| H | -0.987400851906 | -3.490937917068 | 1.712689944288  |
| H | 0.474617608433  | -2.143563013862 | 0.277913243931  |
| H | 0.897102868309  | -0.080849771182 | -1.027105468625 |
| H | -0.817195059434 | 1.709490059432  | -1.116668363175 |
| H | -5.180556616682 | 5.580470982814  | 1.913755509556  |
| H | -3.689653533898 | 5.519280368649  | 3.886777229635  |
| H | -1.732468828133 | 1.969347095150  | 2.262473043579  |
| H | -5.692173131961 | 2.959475809417  | -2.000200295382 |
| H | -5.899777400860 | 4.651856079803  | -0.233765975237 |
| H | -3.298045817160 | 0.187088035045  | -1.907746234593 |
| H | -3.774358114270 | 1.322527505807  | -3.011786530216 |
| H | -4.907587923037 | 0.396909947239  | -2.236770879268 |

### 1a-sigma-8'.xyz

38

-826.483234059

|   |                 |                 |                 |
|---|-----------------|-----------------|-----------------|
| C | -0.010509288768 | -0.005867751681 | -0.005651512245 |
| C | -0.060295825867 | -0.034852386765 | 1.411234158220  |
| C | 1.160094552011  | -0.034945060371 | 2.160071664984  |
| C | 2.413084270343  | 0.010556248924  | 1.463938977491  |
| C | 2.382842723586  | 0.026240851526  | 0.084453677469  |
| C | 1.191460899296  | 0.017655742060  | -0.666833426741 |
| C | 1.087033499930  | -0.088853188483 | 3.577265937402  |
| C | -0.132018922427 | -0.125985096073 | 4.218374711895  |
| C | -1.336142853284 | -0.114971161840 | 3.477754098667  |
| C | -1.299029006466 | -0.073377684048 | 2.102486991426  |
| C | 3.697109978171  | 0.022451207421  | 2.230112081174  |
| C | 4.197102901763  | 1.206699310113  | 2.798077040008  |
| C | 5.412566602815  | 1.157447142014  | 3.540311023146  |
| C | 6.108105404123  | -0.065957659241 | 3.707321977646  |
| C | 5.602775152541  | -1.220943563011 | 3.149905752039  |
| C | 4.404318376214  | -1.172042925745 | 2.421366081622  |
| C | 5.920300663177  | 2.345564331396  | 4.113474685375  |
| C | 5.290900649482  | 3.593985763589  | 3.996002823237  |
| C | 4.118191680177  | 3.678933123155  | 3.291300860913  |
| C | 3.497042650041  | 2.513203965103  | 2.654478959076  |
| N | 3.641971859729  | 0.048882456695  | -0.683766887435 |
| H | 3.781058120933  | -0.819311343764 | -1.214557756928 |
| H | 4.463504013734  | 0.163567427104  | -0.079705398815 |
| H | 3.660944572433  | 0.819952017964  | -1.361156654527 |
| H | 3.332313759683  | 2.760207695668  | 1.590183673656  |
| H | 2.458445609116  | 2.443024791773  | 3.027485632398  |
| H | 3.606822057979  | 4.632070256256  | 3.184744133727  |
| H | 5.732567067839  | 4.469064095518  | 4.459870987400  |
| H | 6.849902449516  | 2.281967827705  | 4.675279524426  |
| H | 7.032954824264  | -0.079108850092 | 4.276629464803  |
| H | 6.119663219688  | -2.167214900287 | 3.272262389817  |
| H | 4.005989730500  | -2.089736277979 | 1.995517313096  |
| H | -2.219761110167 | -0.072466980049 | 1.524181280608  |
| H | -2.289757242295 | -0.144753383726 | 3.997774545483  |
| H | -0.167859912519 | -0.167979133074 | 5.303628452873  |

|   |                 |                 |                 |
|---|-----------------|-----------------|-----------------|
| H | 2.001204361473  | -0.111797664226 | 4.163399588520  |
| H | 1.230406329612  | 0.033259324405  | -1.752112709256 |
| H | -0.938769186876 | -0.006568375421 | -0.570306596735 |

**1a-sigma-8.xyz**

38

-826.478278576

|   |                 |                 |                 |
|---|-----------------|-----------------|-----------------|
| C | -0.011513324019 | 0.094857841867  | -0.017401827288 |
| C | -0.020647908174 | -0.009017568110 | 1.393436576502  |
| C | 1.196717604789  | -0.062952891764 | 2.122496244247  |
| C | 2.426448009451  | -0.018016900263 | 1.441252752623  |
| C | 2.372725205364  | 0.088570333277  | 0.051343740964  |
| C | 1.188909974078  | 0.145249763061  | -0.690897735228 |
| C | 1.145771412870  | -0.158777836036 | 3.604587980946  |
| C | -0.178776014387 | -0.188072475082 | 4.226096591515  |
| C | -1.339036007907 | -0.139660930537 | 3.491102721446  |
| C | -1.251342480315 | -0.051955378217 | 2.097440634254  |
| C | 3.727151340028  | -0.053161348876 | 2.174925650614  |
| C | 4.302110174677  | -1.301625766884 | 2.580419427796  |
| C | 5.536887943673  | -1.276881401335 | 3.306943605852  |
| C | 6.153800610262  | -0.031440299961 | 3.596511139731  |
| C | 5.583786076502  | 1.151483483106  | 3.188239173795  |
| C | 4.363021445649  | 1.139603858759  | 2.476289804157  |
| C | 6.119043040215  | -2.503840219509 | 3.721400029547  |
| C | 5.513838199670  | -3.706163494916 | 3.432623219523  |
| C | 4.297624908777  | -3.731187741653 | 2.711229647230  |
| C | 3.706468705155  | -2.558910533176 | 2.292888371467  |
| N | 3.641821044498  | 0.133243063622  | -0.688844624530 |
| H | 3.702028364507  | 0.952480073665  | -1.306160605959 |
| H | 3.773234564844  | -0.700217404210 | -1.275971484761 |
| H | 4.439357659427  | 0.180464843130  | -0.038716446499 |
| H | 1.702571165935  | -1.046522087297 | 3.960364152401  |
| H | 1.727942578378  | 0.659424843115  | 4.067929179544  |
| H | 2.776929947089  | -2.599937220942 | 1.730571870872  |
| H | 3.826804485599  | -4.683613373386 | 2.482239387251  |
| H | 5.968785353806  | -4.638745679377 | 3.755628889496  |
| H | 7.055704780003  | -2.475969384258 | 4.273458284671  |
| H | 7.090794120989  | -0.027922969749 | 4.148648755864  |
| H | 6.060917501708  | 2.101226056816  | 3.412054908413  |
| H | 3.913617892149  | 2.081424178712  | 2.170004760082  |
| H | -2.170079065529 | -0.012477211160 | 1.516372275912  |
| H | -2.310005619050 | -0.166826449779 | 3.973051671167  |
| H | -0.217183968457 | -0.255085281229 | 5.310205815160  |
| H | 1.218124286540  | 0.227543974169  | -1.772560649184 |
| H | -0.949056520393 | 0.137846318727  | -0.562584743692 |

**3-Sigma-1'.xyz**

39

-885.188205847

|   |                |                |                 |
|---|----------------|----------------|-----------------|
| C | 0.083800454348 | 0.087046403214 | -0.057442088142 |
| C | 0.058400654528 | 0.492659231071 | 1.358880380148  |
| C | 1.282248322466 | 0.153426913591 | 2.152760180655  |

|   |                 |                 |                 |
|---|-----------------|-----------------|-----------------|
| C | 2.439065591865  | -0.340800733256 | 1.475380625758  |
| C | 2.374807592268  | -0.593051782607 | 0.090735031250  |
| C | 1.212040753070  | -0.396853026693 | -0.670491113546 |
| C | 3.631577720893  | -0.604333875594 | 2.200811743276  |
| C | 3.671225554349  | -0.387905147423 | 3.561173480120  |
| C | 2.525029226433  | 0.094774206923  | 4.221243028928  |
| C | 1.348476588424  | 0.365862605349  | 3.528960674396  |
| C | -1.282487021584 | 0.278679801464  | 2.048496229443  |
| C | -1.769453809718 | -1.030560693449 | 2.327376523634  |
| C | -3.040017914965 | -1.177698155930 | 2.973780301525  |
| C | -3.773475177595 | -0.014193847596 | 3.314003738366  |
| C | -3.293555996039 | 1.243377321231  | 3.037325471798  |
| C | -2.037907046924 | 1.392799985631  | 2.397065566418  |
| C | -1.048768202728 | -2.209846178340 | 1.995442226708  |
| C | -1.557024686998 | -3.458697467062 | 2.279881747397  |
| C | -2.812766305617 | -3.599552174114 | 2.915800358757  |
| C | -3.535733954943 | -2.477837683212 | 3.254313511424  |
| O | -1.505711910818 | 2.604477573202  | 2.092075564162  |
| C | -2.218316680712 | 3.793709641961  | 2.425666453590  |
| H | -4.502915571603 | -2.571315089700 | 3.743704875520  |
| H | -3.201163120885 | -4.590712711780 | 3.134412517400  |
| H | -0.985528327032 | -4.344462023607 | 2.014177626457  |
| H | -0.078900085458 | -2.134354913781 | 1.510685167208  |
| H | -3.878008376445 | 2.115135210589  | 3.309338209422  |
| H | -4.738214512591 | -0.124317051510 | 3.803915832317  |
| H | 0.477115334080  | 0.734780751786  | 4.061927339097  |
| H | 2.557311223407  | 0.257183907030  | 5.295184129676  |
| H | 4.577181201977  | -0.588381836178 | 4.124640326898  |
| H | 4.502537029711  | -0.976340159836 | 1.668369388566  |
| H | 3.266804447392  | -0.970630490747 | -0.405043152713 |
| H | 1.211350088097  | -0.633008378674 | -1.729282257470 |
| H | -0.824792203822 | 0.252449766347  | -0.631367164114 |
| H | -1.589438650397 | 4.614926896090  | 2.080953725580  |
| H | -3.183603492379 | 3.830454644688  | 1.909540830543  |
| H | -2.364227148897 | 3.873643501203  | 3.508199281065  |
| H | 0.115189464836  | 1.605533009718  | 1.245745288483  |

### 3-Sigma-1.xyz

39

-885.207593173

|   |                 |                 |                 |
|---|-----------------|-----------------|-----------------|
| C | 0.842470066043  | 0.263356752613  | 1.993735160658  |
| C | -0.129300717407 | 0.137373687447  | 1.019922306829  |
| C | 0.242801170522  | 0.027767246508  | -0.356519128600 |
| C | 1.641748629967  | 0.065889040049  | -0.684022960348 |
| C | 2.604802113009  | 0.195837175220  | 0.349132665936  |
| C | 2.214133001092  | 0.289831885495  | 1.664275822729  |
| C | 2.043256694681  | -0.029781233191 | -2.043533058788 |
| C | 1.115598691466  | -0.160657983329 | -3.050699071234 |
| C | -0.261953760009 | -0.202879387548 | -2.734126266045 |
| C | -0.684296081036 | -0.113148719875 | -1.426218746896 |
| C | -1.592733501138 | 0.112738931703  | 1.470260855269  |
| C | -2.002727893897 | 1.336209292350  | 2.257053548027  |
| C | -2.748831148303 | 1.201428950598  | 3.451826077708  |

|   |                 |                 |                 |
|---|-----------------|-----------------|-----------------|
| C | -3.060899112068 | -0.102941628474 | 3.933717494120  |
| C | -2.681425591439 | -1.270828478877 | 3.304913003309  |
| C | -1.945603429159 | -1.195952275883 | 2.116702308562  |
| C | -1.695334822100 | 2.613467480380  | 1.794637995866  |
| C | -2.117726887213 | 3.737938363081  | 2.504340212787  |
| C | -2.852440240694 | 3.609827905709  | 3.691070439521  |
| C | -3.166764878362 | 2.347357583031  | 4.164085847599  |
| O | -1.534617715134 | -2.228757592426 | 1.443828350427  |
| C | -1.828935692455 | -3.575668190717 | 1.881595376779  |
| H | -3.735865350441 | 2.223984244384  | 5.081711322039  |
| H | -3.171859479922 | 4.494432994418  | 4.233650951606  |
| H | -1.869190953095 | 4.726894786250  | 2.128888528039  |
| H | -1.121121576286 | 2.736770984284  | 0.880608696978  |
| H | -2.945598156927 | -2.227072283955 | 3.739809421152  |
| H | -3.630793031856 | -0.180692665857 | 4.857247666568  |
| H | -1.751585687877 | -0.157623490326 | -1.229007347722 |
| H | -0.995371324339 | -0.309429876519 | -3.529231284473 |
| H | 1.435980774358  | -0.233227124300 | -4.086731897453 |
| H | 3.106145176475  | 0.001938273593  | -2.273288626470 |
| H | 3.659009677797  | 0.220262748676  | 0.082538962614  |
| H | 2.952691342746  | 0.388532090488  | 2.455163418451  |
| H | 0.550521653612  | 0.351097829306  | 3.038199671416  |
| H | -1.374761669487 | -4.216591561900 | 1.129069494449  |
| H | -1.374763146125 | -3.752948337068 | 2.858480842337  |
| H | -2.909905396913 | -3.726764595568 | 1.911030502258  |
| H | -2.234832208083 | 0.123506130231  | 0.574659523996  |

### 3-Sigma-2'.xyz

39

-885.191105741

|   |                 |                 |                 |
|---|-----------------|-----------------|-----------------|
| C | 1.596219279378  | -0.160838414077 | 0.037123917602  |
| C | 2.387065089248  | 0.874608727607  | 0.561631229387  |
| C | 1.821735457019  | 1.862195768101  | 1.351417588382  |
| C | 0.442991533052  | 1.852278992838  | 1.665819706752  |
| C | -0.361260528207 | 0.857386029273  | 1.169300771053  |
| C | 0.178995921853  | -0.161748063462 | 0.325239547724  |
| C | -0.625470783259 | -1.189330565334 | -0.179150399746 |
| C | -0.030213645758 | -2.225373825525 | -1.051661060797 |
| C | 1.432501503625  | -2.212879978797 | -1.241129149322 |
| C | 2.189694113752  | -1.210552538421 | -0.743533258595 |
| C | -2.077554031998 | -1.269075642019 | 0.056627599052  |
| C | -2.632988222097 | -2.324763019010 | 0.850405994635  |
| C | -1.831341535592 | -3.238438200183 | 1.587434153736  |
| C | -2.409016875885 | -4.231937552580 | 2.349095363502  |
| C | -3.814772373055 | -4.356409697757 | 2.432140327301  |
| C | -4.618620655312 | -3.465040678594 | 1.757428723243  |
| C | -4.054764902244 | -2.432314099068 | 0.964065794906  |
| C | -4.869702654053 | -1.486764656270 | 0.292929728446  |
| C | -4.327518267305 | -0.467582014575 | -0.452202544748 |
| C | -2.921586684519 | -0.348741057282 | -0.573906942393 |
| O | -2.323810218261 | 0.591894793339  | -1.337334926907 |
| C | -3.124737632227 | 1.560854799258  | -2.013802237318 |
| H | -0.420489917746 | -3.226435805249 | -0.819294655967 |

|   |                 |                 |                 |
|---|-----------------|-----------------|-----------------|
| H | -0.493359070983 | -2.036264855746 | -2.044516130267 |
| H | 3.451720464671  | 0.890237279793  | 0.347084861520  |
| H | 2.452291832033  | 2.652591804390  | 1.749551559457  |
| H | 0.029309233026  | 2.626555225538  | 2.304264987917  |
| H | -1.417374975820 | 0.827771482718  | 1.415873174787  |
| H | 1.872483179144  | -3.017197843901 | -1.823313034325 |
| H | 3.263104590302  | -1.184674485646 | -0.908489197458 |
| H | -0.748594182907 | -3.147046295535 | 1.573904856124  |
| H | -1.774021768458 | -4.920132626647 | 2.901198781553  |
| H | -4.254706271594 | -5.143707013334 | 3.038293973258  |
| H | -5.701893236292 | -3.532933508842 | 1.829196174342  |
| H | -5.950623723350 | -1.572258616941 | 0.375379173019  |
| H | -4.979917933552 | 0.236397890048  | -0.955876341140 |
| H | -3.786605357768 | 1.082231792827  | -2.743171149554 |
| H | -3.709264781746 | 2.154008500912  | -1.302854490676 |
| H | -2.416856478311 | 2.207002980119  | -2.533183152351 |

### 3-Sigma-3'.xyz

39

-885.188969712

|   |                 |                 |                 |
|---|-----------------|-----------------|-----------------|
| C | 1.527018765086  | -0.141458420577 | 0.356001271099  |
| C | 2.026854071724  | 0.824122053682  | 1.288786766633  |
| C | 1.160728460931  | 1.647512872820  | 1.959575515074  |
| C | -0.229609585963 | 1.528863639004  | 1.723330202696  |
| C | -0.747115740435 | 0.609528753075  | 0.822800365116  |
| C | 0.102743745857  | -0.246456848054 | 0.107223709664  |
| C | -0.408021476515 | -1.211004446828 | -0.847447481981 |
| C | 0.463308421304  | -2.036805834148 | -1.484924329494 |
| C | 1.918304714839  | -1.984994208663 | -1.254966453347 |
| C | 2.393408350941  | -0.985935769707 | -0.304695127735 |
| C | -1.869674859956 | -1.287604229504 | -1.131458339992 |
| C | -2.679984975691 | -2.311287603241 | -0.557081185069 |
| C | -2.163598878439 | -3.287524989388 | 0.341328465301  |
| C | -2.979094015027 | -4.261697038916 | 0.874548851262  |
| C | -4.354535941551 | -4.316028870105 | 0.544822553043  |
| C | -4.887328202662 | -3.382128475416 | -0.314806199043 |
| C | -4.075147765493 | -2.363940135752 | -0.880519858687 |
| C | -4.609562422532 | -1.390955380433 | -1.760032797977 |
| C | -3.820609792657 | -0.404536460343 | -2.303576601129 |
| C | -2.440117796717 | -0.349541908758 | -1.988108698586 |
| O | -1.602240674300 | 0.592629343878  | -2.492085322366 |
| C | -2.129922439964 | 1.603251308590  | -3.346242678751 |
| H | 2.458225721027  | -1.843610621381 | -2.211493992868 |
| H | 2.303192448588  | -2.975997080802 | -0.944523981509 |
| H | 3.099327574679  | 0.885398433981  | 1.450831879505  |
| H | 1.528496242487  | 2.381840467573  | 2.668932237283  |
| H | -0.913208668988 | 2.178308359494  | 2.263728255508  |
| H | -1.819342452519 | 0.550438625047  | 0.667700217239  |
| H | 0.097298478073  | -2.766805786269 | -2.201698561474 |
| H | 3.463565350288  | -0.921297076759 | -0.121449851861 |
| H | -1.111246191043 | -3.263452435582 | 0.609719551093  |
| H | -2.561266905642 | -4.996580309982 | 1.558446753907  |
| H | -4.984372834349 | -5.091710330695 | 0.972592749217  |

|   |                 |                 |                 |
|---|-----------------|-----------------|-----------------|
| H | -5.943697045949 | -3.409189994710 | -0.574352579496 |
| H | -5.667970211141 | -1.428782018796 | -2.008039408608 |
| H | -4.259978301713 | 0.324682432253  | -2.975083303564 |
| H | -2.546146338605 | 1.170021346281  | -4.262630733399 |
| H | -2.893510366655 | 2.197399597781  | -2.831775913944 |
| H | -1.283078708935 | 2.241874296535  | -3.600074425730 |

### 3-Sigma-3.xyz

39

-885.197129842

|   |                |                 |                 |
|---|----------------|-----------------|-----------------|
| C | 3.032215993523 | -1.327821556621 | 0.418912344008  |
| C | 3.209672084381 | -2.382191204782 | 1.354631431674  |
| C | 4.143773143078 | -2.285005718347 | 2.361451755740  |
| C | 4.943743261415 | -1.123200192960 | 2.475285677571  |
| C | 4.796596791160 | -0.083189171248 | 1.583691739571  |
| C | 3.842691278785 | -0.151368362000 | 0.532663997537  |
| C | 3.656808462438 | 0.905551945386  | -0.413186513437 |
| C | 2.708698181525 | 0.780502504535  | -1.410142771280 |
| C | 1.911908263957 | -0.382531587445 | -1.517955084404 |
| C | 2.071085354056 | -1.414771265169 | -0.622451338323 |
| C | 4.483468773437 | 2.146735097745  | -0.338927543516 |
| C | 4.052236097121 | 3.273109369829  | 0.415561400824  |
| C | 2.839171061684 | 3.250447815232  | 1.148041143947  |
| C | 2.433964441339 | 4.347805982159  | 1.874306442098  |
| C | 3.200424795928 | 5.548451274678  | 1.926297629828  |
| C | 4.376590188697 | 5.621545390080  | 1.240837737271  |
| C | 4.841996002866 | 4.497854549661  | 0.470377967806  |
| C | 6.022942184306 | 4.562048375858  | -0.215309819700 |
| C | 6.530544824499 | 3.436312878283  | -1.008629685601 |
| C | 5.683049573351 | 2.218050623174  | -1.030539029690 |
| O | 6.057776453117 | 1.154807029901  | -1.721842807364 |
| C | 7.283477381063 | 1.153429716692  | -2.467921685049 |
| H | 6.718802497479 | 3.794009167097  | -2.036118737877 |
| H | 7.544159779302 | 3.191170631964  | -0.643768494474 |
| H | 2.590510999278 | -3.271955830326 | 1.261059573798  |
| H | 4.269424235326 | -3.098848778123 | 3.071065088510  |
| H | 5.679068642411 | -1.051929931705 | 3.272847970902  |
| H | 5.418045754461 | 0.803193930197  | 1.682453016931  |
| H | 2.574320671433 | 1.589228781080  | -2.124683211530 |
| H | 1.174570760685 | -0.453030975814 | -2.313307223226 |
| H | 1.460881872039 | -2.312117033179 | -0.700148019581 |
| H | 2.226062272283 | 2.355837038928  | 1.130817835612  |
| H | 1.499114633819 | 4.298700225365  | 2.426542445700  |
| H | 2.841991584684 | 6.390346087998  | 2.510107069827  |
| H | 4.985961988920 | 6.520823654954  | 1.259807043635  |
| H | 6.630127385746 | 5.463190395704  | -0.189971104345 |
| H | 7.333313160585 | 0.168414265108  | -2.928934628293 |
| H | 7.263846001383 | 1.925295569579  | -3.242785239133 |
| H | 8.140675442236 | 1.295856530131  | -1.803700175279 |

### 3-Sigma-4'.xyz

39

-885.199277705

|   |                 |                 |                 |
|---|-----------------|-----------------|-----------------|
| C | -0.031165153843 | 0.753563524971  | 0.164983976726  |
| C | 0.015111226011  | 0.290797331846  | 1.512483677397  |
| C | 1.265325668513  | -0.116520432528 | 2.090632735542  |
| C | 2.430032004982  | -0.183287077762 | 1.275747566530  |
| C | 2.354229754737  | 0.152034919763  | -0.174142593400 |
| C | 1.058007675063  | 0.658843711425  | -0.646542971570 |
| C | 3.646619220941  | -0.553817185074 | 1.852189519432  |
| C | 3.727683631544  | -0.831983503940 | 3.211559985965  |
| C | 2.590917162777  | -0.730017049127 | 4.031912604924  |
| C | 1.377492889896  | -0.374857857276 | 3.479952545809  |
| C | -1.244857668217 | 0.224201162769  | 2.248848755148  |
| C | -2.095828327649 | 1.380394906410  | 2.360072286159  |
| C | -3.389538249337 | 1.241303130040  | 2.950981131099  |
| C | -3.796940714195 | -0.034292789362 | 3.418538457381  |
| C | -2.979296514015 | -1.133114106137 | 3.325699536378  |
| C | -1.695419508602 | -1.017821179275 | 2.740544130697  |
| C | -1.679022797351 | 2.681231482288  | 1.977159989547  |
| C | -2.522397029186 | 3.766649176034  | 2.112366660864  |
| C | -3.813549578276 | 3.616944849598  | 2.660976787920  |
| C | -4.231436362150 | 2.373349728904  | 3.083637902918  |
| O | -0.895944055356 | -2.079372771328 | 2.542111975955  |
| C | -1.304659339047 | -3.373784890854 | 2.988174140228  |
| H | -5.212065176240 | 2.243315066976  | 3.535699318947  |
| H | -4.464248763293 | 4.480773114419  | 2.765046831330  |
| H | -2.178588234146 | 4.750641397345  | 1.804108356845  |
| H | -0.677186030041 | 2.839763831261  | 1.589487645562  |
| H | -3.328783682233 | -2.093821107682 | 3.685113326876  |
| H | -4.783978304754 | -0.139882928395 | 3.862474466100  |
| H | 0.501906972295  | -0.268918679896 | 4.111872179689  |
| H | 2.670690453006  | -0.919426097477 | 5.098239435951  |
| H | 4.683257590778  | -1.112368632719 | 3.646334657646  |
| H | 4.536915638766  | -0.612110063736 | 1.231272475983  |
| H | 2.622735058764  | -0.727135850003 | -0.787757719398 |
| H | 0.974965710217  | 0.925986740816  | -1.696930847997 |
| H | -0.981568496833 | 1.090698878844  | -0.235711730655 |
| H | -0.481606958271 | -4.038480419960 | 2.726183706746  |
| H | -1.456357739218 | -3.386445368780 | 4.072086410310  |
| H | -2.214855011206 | -3.694856932985 | 2.471495272628  |
| H | 3.141268435169  | 0.878293660587  | -0.439886058209 |

### 3-Sigma-4.xyz

39

-885.196064555

|   |                |                 |                 |
|---|----------------|-----------------|-----------------|
| C | 3.100524044484 | -1.341729573834 | 0.264143048765  |
| C | 3.427542392294 | -2.567910231923 | 0.900551976035  |
| C | 4.534639827370 | -2.666772844634 | 1.713675889150  |
| C | 5.353843060889 | -1.535619361328 | 1.930757668366  |
| C | 5.063785579773 | -0.331967571694 | 1.323655830952  |
| C | 3.946729439525 | -0.204863277053 | 0.460541934027  |
| C | 3.584778631890 | 1.030609206974  | -0.172881337052 |
| C | 2.408039005617 | 1.115478228451  | -0.910854220821 |
| C | 1.596951559141 | -0.017415476569 | -1.116248361986 |



|   |                |                 |                 |
|---|----------------|-----------------|-----------------|
| C | 1.939568811836 | -1.222068745029 | -0.544250487135 |
| C | 4.441568599977 | 2.224096467917  | -0.135412951408 |
| C | 3.949478980982 | 3.450021322281  | 0.410065458475  |
| C | 2.709062714297 | 3.496317437456  | 1.105470071574  |
| C | 2.243151431987 | 4.685187902406  | 1.627126727674  |
| C | 3.002143084717 | 5.859471159768  | 1.485546380535  |
| C | 4.233649367486 | 5.832084573898  | 0.841184823263  |
| C | 4.725177317303 | 4.641269544540  | 0.306056166557  |
| C | 6.050587528196 | 4.602025922110  | -0.360041478691 |
| C | 6.503117509248 | 3.294557773691  | -0.849998197109 |
| C | 5.749385033146 | 2.157176000826  | -0.727979719264 |
| O | 6.102146994050 | 0.949171406955  | -1.207675792817 |
| C | 7.381185217746 | 0.811917224988  | -1.825285715206 |
| H | 6.820193894280 | 5.013922238913  | 0.316112819650  |
| H | 6.071227635961 | 5.310594510063  | -1.207196266036 |
| H | 2.778540316719 | -3.426304209064 | 0.743264377386  |
| H | 4.774760555432 | -3.609052032414 | 2.198932359153  |
| H | 6.217274010717 | -1.613723903960 | 2.586263899104  |
| H | 5.693527014921 | 0.531224578662  | 1.520611777977  |
| H | 2.139598881454 | 2.055455186742  | -1.385048182276 |
| H | 0.704803044559 | 0.069960036108  | -1.729515964905 |
| H | 1.314957428221 | -2.099386192788 | -0.695790462603 |
| H | 2.138637584507 | 2.585025690839  | 1.244676847417  |
| H | 1.297662110245 | 4.710216312030  | 2.160439977988  |
| H | 2.632825510553 | 6.794038253702  | 1.898754848288  |
| H | 4.823861332815 | 6.740565874136  | 0.754171484037  |
| H | 7.460673253609 | 3.271123472019  | -1.359548392347 |
| H | 7.456199738447 | -0.238363214488 | -2.105958020693 |
| H | 7.451688885821 | 1.438270635206  | -2.721528037807 |
| H | 8.182524322466 | 1.064667430042  | -1.122175262352 |

### 3-Sigma-5'.xyz

39

-885.195179513

|   |                 |                 |                 |
|---|-----------------|-----------------|-----------------|
| C | -0.068616071189 | 0.288748731897  | 0.010895117674  |
| C | -0.049139004245 | 0.120316683423  | 1.386109369072  |
| C | 1.222422932385  | -0.043377197884 | 2.026285924308  |
| C | 2.426285214473  | -0.061420921969 | 1.257561314171  |
| C | 2.358900843157  | 0.101818645364  | -0.123335612731 |
| C | 1.121922974986  | 0.279344397463  | -0.734564586889 |
| C | 3.732418658307  | -0.249709400556 | 1.948342116357  |
| C | 3.702833671204  | -0.386178002456 | 3.408997168952  |
| C | 2.532319490809  | -0.338073249639 | 4.116163990008  |
| C | 1.317943087450  | -0.164795775961 | 3.425795670948  |
| C | -1.322627425277 | 0.100037631595  | 2.155802851311  |
| C | -2.050467328570 | 1.303427563993  | 2.401343408760  |
| C | -3.305832139809 | 1.235360972161  | 3.088540157902  |
| C | -3.785852573962 | -0.028863155713 | 3.510026046002  |
| C | -3.074113663145 | -1.181481035513 | 3.275337796465  |
| C | -1.833199525505 | -1.120723108507 | 2.593254285387  |
| C | -1.571963999587 | 2.584159420064  | 2.006025965909  |
| C | -2.303155587308 | 3.723819506394  | 2.261366790660  |
| C | -3.548698369560 | 3.651097742834  | 2.929370486652  |

|   |                 |                 |                 |
|---|-----------------|-----------------|-----------------|
| C | -4.034469835381 | 2.428734259178  | 3.335644417214  |
| O | -1.088130536072 | -2.220437045011 | 2.313405716932  |
| C | -1.560888478363 | -3.501852225342 | 2.719871756485  |
| H | -4.986787526073 | 2.358295499003  | 3.857202505352  |
| H | -4.113960862699 | 4.558964085216  | 3.123147612361  |
| H | -1.916458710838 | 4.690842964457  | 1.948979917314  |
| H | -0.615183028057 | 2.664413275277  | 1.497963242122  |
| H | -3.470024267957 | -2.133915146721 | 3.609606281365  |
| H | -4.738792641262 | -0.084371059964 | 4.031416299916  |
| H | 0.398001990149  | -0.117454576992 | 4.003932332857  |
| H | 2.525720026861  | -0.428661170452 | 5.197115305426  |
| H | 4.652214397468  | -0.523705003167 | 3.920103494006  |
| H | 4.422847532733  | 0.574585401868  | 1.694511891872  |
| H | 3.267525968395  | 0.090955796664  | -0.719030825756 |
| H | 1.072005896427  | 0.405844540272  | -1.812698482278 |
| H | -1.018934485692 | 0.416425449971  | -0.499298356432 |
| H | -0.803442923709 | -4.210920712732 | 2.384046334996  |
| H | -1.658429714216 | -3.561758779319 | 3.809534414496  |
| H | -2.518669572644 | -3.739074536557 | 2.243517244087  |
| H | 4.261429102960  | -1.126245892559 | 1.532113891391  |

### 3-Sigma-5.xyz

39

-885.194946942

|   |                 |                 |                 |
|---|-----------------|-----------------|-----------------|
| C | -0.261493036932 | -0.048391167502 | -0.260081179670 |
| C | -0.268671189100 | -0.126550419805 | 1.120927794866  |
| C | 0.968956919971  | -0.197569794934 | 1.836784260985  |
| C | 2.194324107652  | -0.203341922655 | 1.094773660093  |
| C | 2.153317787988  | -0.134434185955 | -0.323235830254 |
| C | 0.951336069256  | -0.054993664723 | -0.986683740844 |
| C | 3.427060510541  | -0.270688830092 | 1.797413476398  |
| C | 3.455232736290  | -0.324150896560 | 3.173091264508  |
| C | 2.245732074044  | -0.308293684824 | 3.907111690608  |
| C | 1.033589500264  | -0.245080308663 | 3.254961552615  |
| C | -1.572486412056 | -0.146983134555 | 1.839688017774  |
| C | -2.344686517005 | 1.039216708383  | 2.014995844326  |
| C | -3.623279334323 | 1.005164853108  | 2.651756546133  |
| C | -4.101292082629 | -0.212962305792 | 3.120435135838  |
| C | -3.350507929322 | -1.371488149168 | 2.963971523447  |
| C | -2.090185403335 | -1.350378244961 | 2.329755050888  |
| C | -1.850747331615 | 2.291706927489  | 1.588712382871  |
| C | -2.560238737484 | 3.499160999198  | 1.718434866531  |
| C | -3.800348812307 | 3.493037575807  | 2.299800509221  |
| C | -4.408822250509 | 2.259209332980  | 2.804780220575  |
| O | -1.336455618157 | -2.452482156070 | 2.141929634262  |
| C | -1.810598839484 | -3.712183592205 | 2.616667725235  |
| H | -5.402328352188 | 2.151759094289  | 2.331765322700  |
| H | -4.366355226614 | 4.414709739410  | 2.406303356285  |
| H | -2.114170659057 | 4.420802085242  | 1.359979661837  |
| H | -0.863055723013 | 2.324590925876  | 1.136078013352  |
| H | -3.756347856613 | -2.306987140751 | 3.333290054895  |
| H | -5.069640092134 | -0.267981622550 | 3.610170598511  |
| H | 0.111779658299  | -0.227760627100 | 3.830484062545  |

|   |                 |                 |                 |
|---|-----------------|-----------------|-----------------|
| H | 2.274377463158  | -0.344328334228 | 4.993264168226  |
| H | 4.405268831882  | -0.374913507741 | 3.698950056877  |
| H | 4.353284105340  | -0.276234203338 | 1.226621765589  |
| H | 3.089854714276  | -0.141588566483 | -0.876620442127 |
| H | 0.923541839935  | 0.000736686825  | -2.071659953100 |
| H | -1.205282366107 | 0.004198587085  | -0.797855450435 |
| H | -1.033938876072 | -4.430418138938 | 2.353646000588  |
| H | -1.943273972929 | -3.699445487522 | 3.703841450110  |
| H | -2.747905398138 | -3.991443380267 | 2.123296747183  |
| H | -4.678544301773 | 2.419779951688  | 3.864454180555  |

### 3-Sigma-6'.xyz

39

-885.188969834

|   |                 |                 |                 |
|---|-----------------|-----------------|-----------------|
| C | -2.793449178073 | 2.228215660571  | -2.073378339428 |
| C | -3.760009296363 | 3.181899593430  | -2.318217439294 |
| C | -4.127823875090 | 3.594043053029  | -3.670120899206 |
| C | -3.405790510745 | 2.933785939438  | -4.774032117474 |
| C | -2.457782640015 | 1.996735812799  | -4.534004420077 |
| C | -2.115491874999 | 1.606481588868  | -3.194226637998 |
| C | -1.128622025778 | 0.630029627304  | -2.931243685758 |
| C | -0.845642760396 | 0.307800149724  | -1.605505041242 |
| C | -1.500758365726 | 0.910376892336  | -0.506666494420 |
| C | -2.464135247585 | 1.857701144293  | -0.731456316235 |
| C | -0.397242770225 | -0.060244649675 | -4.032149251545 |
| C | 0.840342562167  | 0.450414783856  | -4.521899034877 |
| C | 1.430452329422  | 1.642590374265  | -4.015599626898 |
| C | 2.627484797514  | 2.107453782882  | -4.515477462358 |
| C | 3.300925537959  | 1.410812266937  | -5.547306935726 |
| C | 2.756175055555  | 0.254630490992  | -6.059431442269 |
| C | 1.524175397742  | -0.251337778118 | -5.567063621013 |
| C | 0.946944757674  | -1.437740579087 | -6.082177438245 |
| C | -0.246757179596 | -1.922842302994 | -5.601386104440 |
| C | -0.926954592789 | -1.230786793169 | -4.567700471453 |
| O | -2.109564758518 | -1.649688876154 | -4.048078806231 |
| C | -2.705696968652 | -2.840247184606 | -4.554001446119 |
| H | -4.030935919295 | 4.694853677043  | -3.739084198422 |
| H | -5.222228457159 | 3.473933322711  | -3.787733416889 |
| H | -4.276151876034 | 3.653712642235  | -1.484900974066 |
| H | -3.658161977080 | 3.223469394989  | -5.789829988063 |
| H | -1.933840578701 | 1.518775454943  | -5.355744154328 |
| H | -0.084786085857 | -0.443951218302 | -1.409944393481 |
| H | -1.234043366323 | 0.615484882742  | 0.503263508931  |
| H | -2.986607461093 | 2.338595086681  | 0.090483768852  |
| H | 0.931140127553  | 2.192525194703  | -3.222435423553 |
| H | 3.059679544498  | 3.020425895411  | -4.112964386826 |
| H | 4.244310274818  | 1.790427065754  | -5.931137730865 |
| H | 3.263472014777  | -0.290808100419 | -6.852664910855 |
| H | 1.462378708424  | -1.973724790380 | -6.876025358446 |
| H | -0.661118803206 | -2.834166926469 | -6.018235000372 |
| H | -2.057353632442 | -3.708709194372 | -4.392199912180 |
| H | -3.628823318384 | -2.967276525709 | -3.987235994644 |
| H | -2.943406200600 | -2.743284559646 | -5.619292146756 |

### 3-Sigma-6.xyz

39

-885.201036107

|   |                 |                 |                 |
|---|-----------------|-----------------|-----------------|
| C | -1.694387420298 | -1.704881059486 | 0.701767062626  |
| C | -2.046846943270 | -2.824312158849 | 1.502538972515  |
| C | -3.248136142740 | -2.864164650788 | 2.174176978269  |
| C | -4.153392173473 | -1.781433546824 | 2.070557149637  |
| C | -3.841729783877 | -0.681287337279 | 1.301792892333  |
| C | -2.608624435425 | -0.605952941574 | 0.599556981544  |
| C | -2.244656837521 | 0.518397894353  | -0.206486099833 |
| C | -1.034943216276 | 0.526447219071  | -0.873440959099 |
| C | -0.137989010349 | -0.561843439541 | -0.771659186725 |
| C | -0.459975494388 | -1.652816937046 | 0.002047732064  |
| C | -3.154084633127 | 1.696336825625  | -0.326074005777 |
| C | -4.072582451088 | 1.821681375385  | -1.366780139437 |
| C | -4.223974663813 | 0.801090183988  | -2.378638663261 |
| C | -5.114851888979 | 0.932160754990  | -3.385003625616 |
| C | -5.987225911175 | 2.122037587249  | -3.509235499998 |
| C | -5.817337818413 | 3.139707845594  | -2.465633008139 |
| C | -4.911723353721 | 3.006984354375  | -1.444918710643 |
| C | -4.783149520094 | 4.027906395481  | -0.448427842067 |
| C | -3.886471654513 | 3.901021487700  | 0.569213631846  |
| C | -3.066461645203 | 2.735791718166  | 0.637827273797  |
| O | -2.177433291681 | 2.549748466907  | 1.596660828057  |
| C | -1.992409662936 | 3.527717414518  | 2.633340916504  |
| H | -5.856121418331 | 2.602347323394  | -4.496521022819 |
| H | -7.051231723834 | 1.823237613519  | -3.542963641030 |
| H | -1.347391199806 | -3.654470138974 | 1.575514658934  |
| H | -3.505374937939 | -3.726564165012 | 2.783918321518  |
| H | -5.101577142138 | -1.819604309562 | 2.601008774492  |
| H | -4.548025744063 | 0.141742881500  | 1.228197703720  |
| H | -0.766333162107 | 1.385550454787  | -1.483638402059 |
| H | 0.806840089316  | -0.527301240108 | -1.307635644397 |
| H | 0.227496885010  | -2.491747395580 | 0.086580135106  |
| H | -3.597249399565 | -0.082352380883 | -2.312058294074 |
| H | -5.214900361115 | 0.154275903821  | -4.136785115172 |
| H | -6.442192492052 | 4.028743633291  | -2.517155772789 |
| H | -5.414228090438 | 4.909484951377  | -0.516921579120 |
| H | -3.797497322626 | 4.678665719287  | 1.318299318800  |
| H | -1.210474100029 | 3.117366931637  | 3.270260002007  |
| H | -1.664895089554 | 4.479003483740  | 2.205951377930  |
| H | -2.913896275789 | 3.654048084305  | 3.207535680806  |

### 3-Sigma-7'.xyz

39

-885.190026674

|   |                |                |                 |
|---|----------------|----------------|-----------------|
| C | 3.004106363058 | 1.012946246640 | -3.423927103779 |
| C | 4.122528941874 | 0.745757713527 | -4.286706486007 |
| C | 3.969094305416 | 0.663105338106 | -5.628630618756 |
| C | 2.642922198044 | 0.836082359950 | -6.252230633271 |
| C | 1.528965660646 | 1.123346458658 | -5.350389361728 |

|   |                 |                 |                 |
|---|-----------------|-----------------|-----------------|
| C | 1.686305551805  | 1.237428478367  | -3.985929588856 |
| C | 0.562104991590  | 1.528605395950  | -3.123486042550 |
| C | 0.772929017114  | 1.534009718081  | -1.760235161320 |
| C | 2.057814771815  | 1.300773191785  | -1.224070530616 |
| C | 3.156791688726  | 1.054151662282  | -2.032743783584 |
| C | -0.781850663873 | 1.825018102163  | -3.680025471593 |
| C | -1.860575012476 | 0.899982309720  | -3.529650055018 |
| C | -1.699938378877 | -0.379546082104 | -2.928256726992 |
| C | -2.766013058816 | -1.244310901467 | -2.806159403240 |
| C | -4.048854582474 | -0.885309007004 | -3.282564294531 |
| C | -4.234673192341 | 0.339528698067  | -3.883054459749 |
| C | -3.157555251290 | 1.253401959707  | -4.024575822042 |
| C | -3.330668780153 | 2.511034393745  | -4.653330124834 |
| C | -2.285437549494 | 3.391957577248  | -4.797916413355 |
| C | -1.000193997487 | 3.051073744111  | -4.309015923129 |
| O | 0.066415695710  | 3.884635152839  | -4.391894605153 |
| C | -0.086042162034 | 5.149140231307  | -5.031919699270 |
| H | 2.671492182464  | 1.629766428250  | -7.024292862967 |
| H | 2.379562263370  | -0.044479529179 | -6.869209270306 |
| H | 5.097804782627  | 0.605199842669  | -3.828958230061 |
| H | 4.815297468924  | 0.461179407675  | -6.278476766595 |
| H | 0.541835923584  | 1.243541771647  | -5.789984206638 |
| H | -0.053865510520 | 1.743755352415  | -1.088327235375 |
| H | 2.186903675695  | 1.328987187791  | -0.145393146398 |
| H | 4.135691623157  | 0.889801591275  | -1.592423113947 |
| H | -0.722386237502 | -0.681752229689 | -2.563734857392 |
| H | -2.617395705577 | -2.216301446394 | -2.342135026286 |
| H | -4.879609082167 | -1.578300574031 | -3.178684180236 |
| H | -5.213051057865 | 0.625915937185  | -4.263224902705 |
| H | -4.315106646174 | 2.781435001991  | -5.028490906446 |
| H | -2.452166519422 | 4.348518077426  | -5.280282651453 |
| H | -0.816846356461 | 5.772941773217  | -4.505549619249 |
| H | 0.896138769389  | 5.620142611068  | -4.981375498862 |
| H | -0.379698768810 | 5.029005121907  | -6.080528188641 |

### 3-Sigma-7.xyz

39

-885.183417608

|   |                 |                 |                 |
|---|-----------------|-----------------|-----------------|
| C | 0.241811181971  | 0.184623565498  | 0.781403494559  |
| C | 1.574270948009  | 0.471087378560  | 0.382397727160  |
| C | 1.873707408144  | 1.625250692083  | -0.306169463380 |
| C | 0.846240467115  | 2.541120615642  | -0.631023546913 |
| C | -0.456750492978 | 2.293422959118  | -0.256666831759 |
| C | -0.798149760647 | 1.118819505704  | 0.465137954467  |
| C | -2.137470362673 | 0.819648381729  | 0.878166090080  |
| C | -2.406985439305 | -0.370168184891 | 1.533592077050  |
| C | -1.376856075375 | -1.285919826495 | 1.840756607336  |
| C | -0.078656233240 | -1.010192729798 | 1.478456981238  |
| C | -3.246669714024 | 1.770435527305  | 0.605073863437  |
| C | -4.261904516133 | 1.417020080045  | -0.367638443805 |
| C | -4.177013778270 | 0.245731705490  | -1.096021866225 |
| C | -5.188115119412 | -0.158299081091 | -2.071955882927 |
| C | -6.326111742504 | 0.756144115186  | -2.270134582870 |

|   |                 |                 |                 |
|---|-----------------|-----------------|-----------------|
| C | -6.388957302615 | 1.929219914893  | -1.597440881641 |
| C | -5.367493219463 | 2.306226710805  | -0.663198093130 |
| C | -5.404554899094 | 3.551218883398  | -0.020413966247 |
| C | -4.426085774980 | 3.882406780538  | 0.892046328912  |
| C | -3.363083026839 | 3.003671446487  | 1.235721140799  |
| O | -2.523197348795 | 3.511349962023  | 2.167350390578  |
| C | -2.038834398943 | 2.692959200121  | 3.242479133822  |
| H | -5.540570301054 | -1.172439842459 | -1.799576581898 |
| H | -4.681805158646 | -0.366750169479 | -3.034187204038 |
| H | 2.356972330731  | -0.243296717979 | 0.628008865728  |
| H | 2.897404138593  | 1.832834578346  | -0.606747366581 |
| H | 1.086098472219  | 3.445912870926  | -1.183713675491 |
| H | -1.235604040972 | 3.001791720792  | -0.524549834206 |
| H | -3.425314295950 | -0.589977961612 | 1.845323447887  |
| H | -1.618603259767 | -2.203416091413 | 2.370246864307  |
| H | 0.720393949736  | -1.708604155356 | 1.716951280243  |
| H | -3.327386643342 | -0.416976614442 | -0.960312495413 |
| H | -7.100201343512 | 0.468136515422  | -2.974892233641 |
| H | -7.213303739528 | 2.619154318707  | -1.755041015485 |
| H | -6.211540216769 | 4.246773820740  | -0.229913484455 |
| H | -4.459318293006 | 4.838772127965  | 1.406809862546  |
| H | -1.146093571441 | 2.136277057260  | 2.949923505306  |
| H | -1.789889915294 | 3.391605509487  | 4.043010595382  |
| H | -2.818610602729 | 2.004972681853  | 3.580990244837  |

### 3-Sigma-8'.xyz

39

-885.195716659

|   |                 |                 |                 |
|---|-----------------|-----------------|-----------------|
| C | 2.950047260566  | 0.519074501868  | -3.563288400578 |
| C | 4.059756381399  | -0.000974193932 | -4.261113035174 |
| C | 3.962641117650  | -0.625647503116 | -5.515766308941 |
| C | 2.733090037068  | -0.724215908795 | -6.113862336018 |
| C | 1.520104270149  | -0.180785195246 | -5.498513803209 |
| C | 1.650630254824  | 0.409682934433  | -4.141823986577 |
| C | 0.535291184901  | 0.875328026863  | -3.429388516979 |
| C | 0.745747477417  | 1.449104231063  | -2.169658985996 |
| C | 2.024275662269  | 1.576933694869  | -1.600276879624 |
| C | 3.124637975069  | 1.111910485249  | -2.286432162083 |
| C | -0.850563646590 | 0.775660047317  | -3.967230388043 |
| C | -1.807755181461 | -0.089502237756 | -3.351698942671 |
| C | -1.477039575819 | -0.956318269503 | -2.272008204189 |
| C | -2.427527026802 | -1.775127725673 | -1.701275282409 |
| C | -3.759692193648 | -1.780074398992 | -2.177391954641 |
| C | -4.109797990471 | -0.965034654193 | -3.230366866435 |
| C | -3.153960115594 | -0.112009439347 | -3.842119941301 |
| C | -3.496984089216 | 0.718955674867  | -4.936818144855 |
| C | -2.565967658446 | 1.532841596074  | -5.536448022026 |
| C | -1.234692539968 | 1.561753072696  | -5.051791505791 |
| O | -0.269310757289 | 2.344137314702  | -5.603105755497 |
| C | -0.616508338348 | 3.245878579209  | -6.652606587690 |
| H | 0.703584282839  | -0.920989936805 | -5.544919095209 |
| H | 1.144725891052  | 0.608560437214  | -6.184803799128 |
| H | 5.039122357327  | 0.079930630706  | -3.793828300974 |

|   |                 |                 |                 |
|---|-----------------|-----------------|-----------------|
| H | 4.853601764779  | -1.016291732803 | -5.995412022680 |
| H | 2.632593702241  | -1.191278417052 | -7.090238147523 |
| H | -0.115924112365 | 1.814038029923  | -1.616217806455 |
| H | 2.134570383206  | 2.036235777344  | -0.622796081661 |
| H | 4.123503251212  | 1.188481355596  | -1.866368392291 |
| H | -0.457798761207 | -0.982202274706 | -1.897982225668 |
| H | -2.147807569196 | -2.429381985293 | -0.879101983183 |
| H | -4.498442505050 | -2.430628009775 | -1.716525942599 |
| H | -5.127918336461 | -0.964888970464 | -3.614145844211 |
| H | -4.518622496274 | 0.705884451827  | -5.309817467862 |
| H | -2.857530798112 | 2.153946145526  | -6.376012921759 |
| H | -1.378647326157 | 3.959097010620  | -6.320695104257 |
| H | 0.303231116555  | 3.780489914627  | -6.891962566133 |
| H | -0.965986441543 | 2.706549195098  | -7.539709283728 |

### 3-Sigma-8.xyz

39

-885.196013593

|   |                 |                 |                 |
|---|-----------------|-----------------|-----------------|
| C | 0.075175235750  | 0.057810983656  | 0.754061716261  |
| C | 1.340970247847  | 0.208787214267  | 0.127209064140  |
| C | 1.588787671583  | 1.263215558263  | -0.722754080918 |
| C | 0.576694997320  | 2.217745349135  | -0.979447610850 |
| C | -0.661922024563 | 2.100293512880  | -0.386774199603 |
| C | -0.952849855584 | 1.020394495280  | 0.490369616579  |
| C | -2.225822504881 | 0.860444336678  | 1.125900391544  |
| C | -2.443674416649 | -0.214468626830 | 1.967410048062  |
| C | -1.423395034723 | -1.156921890230 | 2.230102238914  |
| C | -0.190608467700 | -1.024062075138 | 1.634530746773  |
| C | -3.362535771780 | 1.785589081613  | 0.820389526997  |
| C | -4.146950651790 | 1.510466670035  | -0.305246463358 |
| C | -3.816870129128 | 0.360332368223  | -1.201522294899 |
| C | -4.693375759910 | 0.136318497100  | -2.364427631310 |
| C | -5.766838067508 | 0.931005921712  | -2.632013968636 |
| C | -6.056853432376 | 2.004233116469  | -1.757255948197 |
| C | -5.293684932769 | 2.304550897888  | -0.626672864407 |
| C | -5.652076334699 | 3.387805765336  | 0.223992193622  |
| C | -4.896454377090 | 3.663447192045  | 1.323879862659  |
| C | -3.741478610290 | 2.888032446911  | 1.633880020809  |
| O | -3.134644751187 | 3.334252662097  | 2.728883583496  |
| C | -1.856160786707 | 2.905060550104  | 3.222336584309  |
| H | -2.780164304906 | 0.448194952010  | -1.570121580190 |
| H | -3.773917961441 | -0.575096501788 | -0.616908890372 |
| H | 2.115231460535  | -0.527346393749 | 0.332400332882  |
| H | 2.561597693024  | 1.366928448618  | -1.196364041488 |
| H | 0.778817414742  | 3.050878301002  | -1.647787038659 |
| H | -1.427713912801 | 2.845507146204  | -0.588269837811 |
| H | -3.416920557989 | -0.337281960798 | 2.437273329812  |
| H | -1.623921101783 | -1.987493606277 | 2.901519736629  |
| H | 0.597015812557  | -1.748812068782 | 1.828755438760  |
| H | -4.447058766878 | -0.700648871351 | -3.012724779943 |
| H | -6.401162692878 | 0.753278960803  | -3.493942273549 |
| H | -6.921183859357 | 2.630083870854  | -1.970271939957 |
| H | -6.525739136301 | 3.988234970701  | -0.012858969804 |

|   |                 |                |                |
|---|-----------------|----------------|----------------|
| H | -5.139308254529 | 4.484949788359 | 1.990176841426 |
| H | -1.101950862269 | 2.950567273737 | 2.435522474791 |
| H | -1.617825423150 | 3.622417799656 | 4.007809549568 |
| H | -1.919453675831 | 1.899861271741 | 3.640395377302 |

**8-sigma-1'a.xyz**

35

-787.170670093

|   |                 |                 |                 |
|---|-----------------|-----------------|-----------------|
| C | -0.007011778413 | -0.011497818994 | 0.007021404392  |
| C | 0.018808761847  | -0.002834017575 | 1.421451666116  |
| C | 1.286284108923  | 0.022275688366  | 2.097109533187  |
| C | 2.481717580285  | 0.040629425942  | 1.331373898032  |
| C | 2.420064761200  | 0.029357969842  | -0.041025863113 |
| C | 1.170195561860  | 0.003770109724  | -0.706223891432 |
| C | -1.169029125191 | -0.024306567705 | 2.191763473545  |
| C | -1.097509708584 | -0.022668621468 | 3.554043526586  |
| N | 0.125575252170  | 0.000821687963  | 4.159159888340  |
| C | 1.292710908994  | 0.024593148031  | 3.508709934039  |
| C | 2.559354681955  | 0.027681755294  | 4.344728076462  |
| C | 3.387381864153  | 1.285121954248  | 4.242518607546  |
| C | 4.811447817710  | 1.174033402764  | 4.299728781709  |
| C | 5.411185342766  | -0.095735798948 | 4.335975552593  |
| C | 4.675060719402  | -1.299374841231 | 4.294262455636  |
| C | 3.313000219757  | -1.254948173614 | 4.245546237313  |
| C | 5.616931576476  | 2.343775360775  | 4.284945196353  |
| C | 5.024483703485  | 3.587015540682  | 4.207042062799  |
| C | 3.624795350647  | 3.682170487074  | 4.147591800778  |
| C | 2.811816180472  | 2.545928650671  | 4.171388391845  |
| H | 2.729662288492  | -2.171392773984 | 4.212343141360  |
| H | 1.733339232386  | 2.665021903715  | 4.130596710124  |
| H | 3.158062608216  | 4.660791956609  | 4.081395513935  |
| H | 5.631220870333  | 4.486499499963  | 4.191667872650  |
| H | 6.697026821737  | 2.240912598633  | 4.334257505292  |
| H | 6.496613491901  | -0.152078598108 | 4.377688652701  |
| H | 5.196518327984  | -2.250339508342 | 4.289944996588  |
| H | -0.965922578859 | -0.031768432989 | -0.502476159665 |
| H | 1.144675735458  | -0.003144026374 | -1.791994473599 |
| H | 3.336998058567  | 0.042809588295  | -0.622184015707 |
| H | 3.448861432014  | 0.067365240486  | 1.821942393892  |
| H | 0.133446940706  | -0.000787840054 | 5.176742438117  |
| H | -1.953694751084 | -0.038813224199 | 4.215110560490  |
| H | -2.138902755014 | -0.043772834612 | 1.706867367654  |
| H | 2.243549077975  | 0.002766404845  | 5.409396456076  |

**8-sigma-1'b.xyz**

35

-787.170251696

|   |                 |                 |                 |
|---|-----------------|-----------------|-----------------|
| C | -0.018656231596 | -0.018618556114 | 0.009368180204  |
| C | 0.017832262600  | 0.011232053108  | 1.423005150884  |
| C | 1.290782695337  | -0.002436749193 | 2.096521135635  |
| C | 2.479114108280  | -0.046233370047 | 1.315985636105  |
| C | 2.404868251255  | -0.073658709041 | -0.055775257979 |



|   |                 |                 |                 |
|---|-----------------|-----------------|-----------------|
| C | 1.151370155344  | -0.060548734772 | -0.713301584241 |
| C | -1.170200724410 | 0.056661313549  | 2.190729126765  |
| C | -1.099694462972 | 0.089852795712  | 3.552680597351  |
| N | 0.122430003741  | 0.073621182100  | 4.155785112717  |
| C | 1.292617584152  | 0.031279120049  | 3.508199963714  |
| C | 2.540130802016  | -0.014274580548 | 4.379240434196  |
| C | 2.642152815652  | 1.112017713966  | 5.378341513358  |
| C | 3.053478298533  | 0.818505114793  | 6.713910959371  |
| C | 3.291896958648  | -0.513293764817 | 7.092710485009  |
| C | 3.147433251404  | -1.606212915763 | 6.210578321540  |
| C | 2.759309373011  | -1.385967003367 | 4.923126058771  |
| C | 3.205595217489  | 1.866928289654  | 7.658842962958  |
| C | 2.950864300912  | 3.171350665771  | 7.287122417186  |
| C | 2.547103464573  | 3.447636310848  | 5.971536231574  |
| C | 2.396772605633  | 2.431234344756  | 5.023178792444  |
| H | 2.638705453275  | -2.217329477193 | 4.233529521380  |
| H | 2.089685449867  | 2.686473618132  | 4.012770755730  |
| H | 2.346385314344  | 4.474091501767  | 5.678088402957  |
| H | 3.062194159704  | 3.979699210200  | 8.002458881488  |
| H | 3.524471511635  | 1.624552996841  | 8.668379952939  |
| H | 3.597274243803  | -0.708930836765 | 8.118355850421  |
| H | 3.337662435158  | -2.613206448672 | 6.565647730687  |
| H | -0.982278336832 | -0.006596069385 | -0.491390799381 |
| H | 1.116874000411  | -0.082333771012 | -1.798637426971 |
| H | 3.318203309759  | -0.105496647593 | -0.642383522784 |
| H | 3.456326137315  | -0.061893934858 | 1.786030077716  |
| H | 0.129771536838  | 0.103127316577  | 5.173155220737  |
| H | -1.955321619538 | 0.129790318120  | 4.213591958458  |
| H | -2.139221566159 | 0.067910810013  | 1.703979393924  |
| H | 3.404325843586  | 0.124341065196  | 3.704544367533  |

### 8-sigma-2'.xyz

35

-787.169164054

|   |                 |                 |                 |
|---|-----------------|-----------------|-----------------|
| C | 1.414091288749  | -0.248093923498 | 0.265752833962  |
| C | 2.062423595599  | 0.562514124288  | 1.261223247893  |
| C | 1.338888193527  | 1.456374060715  | 1.999376700296  |
| C | -0.059049099870 | 1.586096531912  | 1.785109064382  |
| C | -0.721161557222 | 0.830848704415  | 0.834150486660  |
| C | -0.020455276165 | -0.098157245950 | 0.049103224862  |
| C | -0.693385262217 | -0.876020734536 | -0.941782899489 |
| C | -0.014164974210 | -1.770498907675 | -1.701323169456 |
| C | 1.431023736559  | -1.980672663797 | -1.528737216143 |
| C | 2.106054597359  | -1.164872918925 | -0.502317545247 |
| C | 3.570340816543  | -1.388958907734 | -0.327826356412 |
| C | 5.538112415228  | -2.407813510245 | 0.696509490860  |
| C | 6.101144038813  | -3.259302628939 | 1.675622535069  |
| C | 5.286708915939  | -3.917219097859 | 2.569392116932  |
| C | 3.879624475800  | -3.757056534746 | 2.526004685857  |
| C | 3.295713146201  | -2.937974223579 | 1.590752944790  |
| C | 4.110734145102  | -2.242832656902 | 0.656387127378  |
| N | 4.390805467539  | -0.772564885424 | -1.186290231746 |
| C | 5.748374020528  | -0.903361639787 | -1.174111426310 |

|   |                 |                 |                 |
|---|-----------------|-----------------|-----------------|
| C | 6.335312266611  | -1.713535917105 | -0.244710264141 |
| H | 1.949371842556  | -1.866163293151 | -2.499980240064 |
| H | 1.626153765100  | -3.050371472653 | -1.316976428609 |
| H | 3.131090751146  | 0.463154369765  | 1.420755763189  |
| H | 1.825833349426  | 2.069683408253  | 2.750343846362  |
| H | -0.619578858433 | 2.299272996928  | 2.382852759709  |
| H | -1.789832085774 | 0.951211286503  | 0.686130235583  |
| H | -1.761317149588 | -0.731272990480 | -1.073608505721 |
| H | -0.517361211473 | -2.363233192353 | -2.459000363755 |
| H | 7.179331580871  | -3.384206527058 | 1.708565139463  |
| H | 5.724366236077  | -4.570111430293 | 3.318908719769  |
| H | 3.258065237645  | -4.288083540411 | 3.240339370741  |
| H | 2.216723851435  | -2.823464941222 | 1.568895453492  |
| H | 3.990031765775  | -0.144715160773 | -1.880445527704 |
| H | 6.285058058392  | -0.336394504208 | -1.923454507271 |
| H | 7.414644369291  | -1.819109215199 | -0.234484997912 |

### 8-sigma-3'.xyz

35

-787.177746572

|   |                 |                 |                 |
|---|-----------------|-----------------|-----------------|
| C | 1.385778315405  | -0.308059177837 | -0.210446112498 |
| C | 1.931297245620  | 0.437701683315  | -1.258253852953 |
| C | 1.126161538811  | 1.288582401931  | -2.010016744847 |
| C | -0.252949900584 | 1.437656168328  | -1.752916174973 |
| C | -0.823462603889 | 0.729648446015  | -0.724225157451 |
| C | -0.026890184846 | -0.153411832995 | 0.069884120088  |
| C | -0.595385416675 | -0.852694197047 | 1.114249400927  |
| C | 0.178182811896  | -1.754289438971 | 1.960479505466  |
| C | 1.607908437431  | -1.895428303751 | 1.631878839384  |
| C | 2.173643209798  | -1.216535815596 | 0.603449182538  |
| C | 3.623697442674  | -1.405914225253 | 0.319399675614  |
| C | 5.548812723864  | -2.334573151329 | -0.869136969934 |
| C | 6.065153372986  | -3.161132869185 | -1.894281791768 |
| C | 5.208030850175  | -3.857963923931 | -2.716710185467 |
| C | 3.804334266246  | -3.765776603255 | -2.549993131891 |
| C | 3.266826170520  | -2.972400402708 | -1.565103598810 |
| C | 4.125534071133  | -2.234583847452 | -0.707029525905 |
| N | 4.487583999928  | -0.760715313462 | 1.110710897543  |
| C | 5.845200320503  | -0.835215870981 | 0.993606137850  |
| C | 6.390195214075  | -1.609154224359 | 0.010191157155  |
| H | 0.052277805301  | -1.444024431732 | 3.016259922606  |
| H | -0.316441556467 | -2.744499265492 | 1.974122285825  |
| H | 2.987216216354  | 0.365710392533  | -1.497568870962 |
| H | 1.578020350014  | 1.855184926860  | -2.819459530600 |
| H | -0.848420914368 | 2.109271841548  | -2.362249325922 |
| H | -1.880301006267 | 0.827244028184  | -0.493599344654 |
| H | -1.654634091774 | -0.735744688418 | 1.331449716651  |
| H | 2.196971480889  | -2.575543679188 | 2.240397563058  |
| H | 7.141252016660  | -3.238496473022 | -2.018690061734 |
| H | 5.609841169912  | -4.492232234466 | -3.501621108181 |
| H | 3.149133057758  | -4.331416176985 | -3.205479031664 |
| H | 2.190916752759  | -2.914491298103 | -1.435586008520 |
| H | 4.108490025688  | -0.171943774834 | 1.849411276321  |

|   |                |                 |                 |
|---|----------------|-----------------|-----------------|
| H | 6.415961796330 | -0.255868575435 | 1.707523060764  |
| H | 7.468784170848 | -1.666121555494 | -0.088925030402 |

### 8-sigma-3.xyz

35

-787.153758321

|   |                 |                 |                 |
|---|-----------------|-----------------|-----------------|
| C | -1.995430335313 | 2.226228077385  | 0.713325382324  |
| C | -0.955733522392 | 2.832969293703  | 1.464286450941  |
| C | -1.244935845062 | 3.689096236172  | 2.505931035348  |
| C | -2.582367327417 | 3.989158074213  | 2.846010652371  |
| C | -3.612908109306 | 3.440117431422  | 2.118061242500  |
| C | -3.350877348014 | 2.559907821820  | 1.036010055768  |
| C | -4.412212597978 | 2.025417925125  | 0.261530585378  |
| C | -4.167877435977 | 1.205051908526  | -0.817250934824 |
| C | -2.845257822811 | 0.871971009642  | -1.157714134534 |
| C | -1.776265524244 | 1.344080314815  | -0.402922087647 |
| C | -0.445805429900 | 0.825135984368  | -0.725289468116 |
| C | 1.384265137658  | 0.233030975573  | -2.331366590080 |
| C | 1.946465267052  | 0.255435866185  | -3.636177393253 |
| C | 1.294520583990  | 0.931032276098  | -4.652851974550 |
| C | 0.098466398757  | 1.603060769150  | -4.374691531755 |
| C | -0.483125115235 | 1.592676645791  | -3.093418067302 |
| C | 0.124911895685  | 0.887403543676  | -2.068777444763 |
| N | 0.261785805297  | 0.260892801193  | 0.225473193917  |
| C | 1.568506826925  | -0.329744903059 | 0.079238114204  |
| C | 2.072132861302  | -0.345451574240 | -1.284427798366 |
| H | 1.548295217670  | -1.357508818609 | 0.480250769725  |
| H | 2.297570771661  | 0.194045064432  | 0.724849377845  |
| H | 0.085123201497  | 2.648329958742  | 1.215777811995  |
| H | -0.431590273266 | 4.143445071807  | 3.064979819331  |
| H | -2.792429893643 | 4.663419207210  | 3.671491210757  |
| H | -4.646581238268 | 3.681446373647  | 2.353302531689  |
| H | -5.433603443638 | 2.283255623323  | 0.530718206065  |
| H | -4.987128987434 | 0.800904921993  | -1.403539063511 |
| H | -2.670398812611 | 0.187852455380  | -1.983012329545 |
| H | 2.891243448708  | -0.249280967881 | -3.813077473634 |
| H | 1.714484346547  | 0.957643761666  | -5.652457874888 |
| H | -0.398472636637 | 2.156505265770  | -5.165809100039 |
| H | -1.397453140580 | 2.148378467153  | -2.921986160282 |
| H | -0.160923458724 | 0.178684063987  | 1.148563735099  |
| H | 3.041599076045  | -0.811310799175 | -1.443525051663 |

### 8-sigma-4'.xyz

35

-787.175718576

|   |                 |                 |                 |
|---|-----------------|-----------------|-----------------|
| C | 1.356647363621  | -0.127922524070 | -0.213103732141 |
| C | 1.922697311296  | 0.788046497485  | -1.144064420923 |
| C | 1.147873551665  | 1.790725984330  | -1.680934334772 |
| C | -0.205992879318 | 1.905792973500  | -1.310839235679 |
| C | -0.785822998525 | 1.013394185198  | -0.415247885171 |
| C | -0.026665927501 | -0.012530666142 | 0.142100880862  |
| C | -0.630334423600 | -0.982613281619 | 1.090162739071  |

|   |                 |                 |                 |
|---|-----------------|-----------------|-----------------|
| C | 0.237984906158  | -2.041827172671 | 1.598546049435  |
| C | 1.557324250198  | -2.135542417240 | 1.239089680522  |
| C | 2.113267959143  | -1.177635769135 | 0.364085776263  |
| C | 3.570794343018  | -1.306592257480 | 0.080155446204  |
| C | 5.549255476676  | -2.404478771307 | -0.831418184744 |
| C | 6.123613324062  | -3.449092839636 | -1.592818777338 |
| C | 5.316938113373  | -4.391506486856 | -2.189827130664 |
| C | 3.907223171386  | -4.329371200660 | -2.061927182274 |
| C | 3.312358594297  | -3.329729893486 | -1.330937688913 |
| C | 4.119784127879  | -2.352344124423 | -0.689329984722 |
| N | 4.381411115910  | -0.395848896111 | 0.632026891125  |
| C | 5.739867661688  | -0.415791043271 | 0.517993719057  |
| C | 6.336947347189  | -1.409069938801 | -0.205635010626 |
| H | -1.525250960505 | -1.453730134942 | 0.642416974110  |
| H | -1.071282037372 | -0.455645506678 | 1.957392515920  |
| H | 2.961177978637  | 0.690005020402  | -1.443113260067 |
| H | 1.575943038193  | 2.488541907179  | -2.393333605543 |
| H | -0.810648776258 | 2.700507753449  | -1.738287432188 |
| H | -1.834616483427 | 1.112013115716  | -0.150065139299 |
| H | -0.188854397457 | -2.760929446202 | 2.292159942987  |
| H | 2.186906986211  | -2.920519430497 | 1.644500502230  |
| H | 7.203400611938  | -3.492272919278 | -1.699374142379 |
| H | 5.762689352510  | -5.192606283462 | -2.772147152599 |
| H | 3.291895544515  | -5.078390171144 | -2.550792624625 |
| H | 2.231020860978  | -3.284942612416 | -1.251197415601 |
| H | 3.970694497130  | 0.340665535986  | 1.202616118675  |
| H | 6.270109200445  | 0.377309663230  | 1.028693394050  |
| H | 7.417659806100  | -1.427779525669 | -0.294732707366 |

### 8-sigma-4.xyz

35

-787.160175911

|   |                 |                 |                 |
|---|-----------------|-----------------|-----------------|
| C | 0.065293130892  | -0.072200655297 | -0.079762747523 |
| C | 0.020994642960  | -0.006667568023 | 1.409207154043  |
| C | 1.236508363152  | 0.055378625030  | 2.155032561926  |
| C | 2.483127643476  | 0.034206051034  | 1.475229119982  |
| N | 2.461992879763  | 0.126273173902  | 0.073266001263  |
| C | 1.390946948965  | 0.062295733954  | -0.664421553408 |
| C | 1.184065838724  | 0.215475981786  | 3.565646730162  |
| C | -0.033988261477 | 0.226940427932  | 4.213513215616  |
| C | -1.220545033765 | 0.109143108384  | 3.473513887628  |
| C | -1.192823478295 | 0.010837347102  | 2.082204399114  |
| C | 3.770993269380  | -0.139577449245 | 2.069810596139  |
| C | 4.953342627751  | 0.549118943368  | 1.599740486426  |
| C | 6.226924093826  | 0.082507919837  | 2.053022653296  |
| C | 6.290788358674  | -0.984317732327 | 2.982663489357  |
| C | 5.144327093797  | -1.579341052471 | 3.482959346631  |
| C | 3.891511495034  | -1.158199054886 | 3.038572480732  |
| C | 7.406725427638  | 0.729184568451  | 1.611084594096  |
| C | 7.336758042501  | 1.822479638845  | 0.770876994317  |
| C | 6.081737882376  | 2.321420572768  | 0.379020386143  |
| C | 4.910268164216  | 1.709833636362  | 0.798963170969  |
| H | 1.535767403679  | 0.072178893525  | -1.740328521359 |

|   |                 |                 |                 |
|---|-----------------|-----------------|-----------------|
| H | 3.961111380124  | 2.169599435866  | 0.537325274024  |
| H | 6.023128319740  | 3.207849858482  | -0.245882549896 |
| H | 8.244820893536  | 2.313943365287  | 0.434836578736  |
| H | 8.367403576517  | 0.361615063140  | 1.961445391368  |
| H | 7.267194963815  | -1.331354423792 | 3.311142827616  |
| H | 5.213674393650  | -2.401331594214 | 4.187690394477  |
| H | 3.008371051087  | -1.702150056030 | 3.356072002751  |
| H | -2.121750594247 | -0.043955538064 | 1.522508473018  |
| H | -2.177829656228 | 0.125688700927  | 3.986287977841  |
| H | -0.074071960432 | 0.353949649525  | 5.290404002200  |
| H | 2.098137252029  | 0.370765966893  | 4.127251574956  |
| H | 3.368053577695  | 0.132975030574  | -0.397363220543 |
| H | -0.337446260296 | -1.029603523330 | -0.463147268315 |
| H | -0.596771286316 | 0.672657701245  | -0.550641150038 |

### 8-sigma-5'.xyz

35

-787.182942255

|   |                 |                 |                 |
|---|-----------------|-----------------|-----------------|
| C | 1.427031868933  | 0.821924486475  | -1.569788591191 |
| C | 1.334338891830  | 0.597775204391  | -0.176086006293 |
| C | 0.121140365865  | 0.544156184320  | 0.523885191722  |
| C | -1.055206362551 | 0.717201884776  | -0.161379650996 |
| C | -1.080459852427 | 0.964606913686  | -1.603114828114 |
| C | 0.226646379588  | 1.026677812662  | -2.307534031798 |
| C | 0.291859700131  | 1.291346681509  | -3.677822653141 |
| C | 1.522418558198  | 1.356948588865  | -4.312280000835 |
| C | 2.719789888990  | 1.153476105889  | -3.600205999963 |
| C | 2.685981905426  | 0.879521562512  | -2.246017461070 |
| C | 3.969255543824  | 0.667808816699  | -1.524424971460 |
| C | 5.736390520021  | -0.652713736957 | -0.467992372792 |
| C | 6.243817288141  | -1.910921095771 | -0.068501981748 |
| C | 5.527395832390  | -3.058349656902 | -0.326762751735 |
| C | 4.281804879480  | -3.002466897175 | -0.998953447403 |
| C | 3.756186084189  | -1.797794083309 | -1.400186311526 |
| C | 4.465840783468  | -0.595441125684 | -1.135662305020 |
| N | 4.706535844926  | 1.756762276328  | -1.276860770339 |
| C | 5.921021624096  | 1.742368792987  | -0.655448268066 |
| C | 6.445800974168  | 0.552439875080  | -0.241173716857 |
| H | -1.662813441515 | 1.886129956101  | -1.787215944949 |
| H | -1.728117454325 | 0.198097242694  | -2.069267805847 |
| H | 2.251294289584  | 0.463285030466  | 0.392566773981  |
| H | 0.126837875597  | 0.367705836407  | 1.593786972817  |
| H | -2.008647671155 | 0.674201630088  | 0.358412410349  |
| H | -0.622428696924 | 1.449791324423  | -4.242514685657 |
| H | 1.570896496849  | 1.565905298170  | -5.376665223261 |
| H | 3.669214335024  | 1.199523644956  | -4.125178313766 |
| H | 7.202857502106  | -1.956709865839 | 0.439005708119  |
| H | 5.922507116523  | -4.021918457647 | -0.018076172316 |
| H | 3.741541746228  | -3.922100096187 | -1.202065412727 |
| H | 2.808290098188  | -1.762573047016 | -1.927384744278 |
| H | 4.331997711339  | 2.659005448282  | -1.562440860725 |
| H | 6.399588872928  | 2.703985279956  | -0.523492342056 |
| H | 7.409000515398  | 0.537814220308  | 0.257393143038  |

### 8-sigma-5.xyz

35

-787.167335007

|   |                 |                 |                 |
|---|-----------------|-----------------|-----------------|
| C | 4.363454126300  | 1.406052747943  | 0.561897380985  |
| C | 4.409633275375  | 2.116416081691  | -0.664743257599 |
| C | 5.566895944895  | 2.750207135954  | -1.068005855746 |
| C | 6.733776503082  | 2.694066496509  | -0.275419666548 |
| C | 6.729844444254  | 1.981913013107  | 0.903616210860  |
| C | 5.558373252746  | 1.315646097183  | 1.345736640508  |
| C | 5.561597763836  | 0.542065383775  | 2.535928106300  |
| C | 4.439226740174  | -0.142114361470 | 2.946984163008  |
| C | 3.253954072926  | -0.059477993647 | 2.194800425808  |
| C | 3.198202160859  | 0.713481317080  | 1.038111976903  |
| C | 1.894025538770  | 0.860836067785  | 0.395419394239  |
| C | -0.253796567687 | 0.035616622661  | -0.475875064139 |
| C | -1.127624195416 | -1.106905561887 | -0.842162149999 |
| C | -0.544527844315 | -2.445936696196 | -0.734680348913 |
| C | 0.760868044900  | -2.651972626976 | -0.353638071748 |
| C | 1.555899630382  | -1.552746494644 | -0.017370386195 |
| C | 1.062158830221  | -0.220709997973 | -0.007405801184 |
| N | 1.400457921989  | 2.102485688675  | 0.215265653072  |
| C | 0.168792485503  | 2.376369802265  | -0.269404853212 |
| C | -0.689577398032 | 1.355400647259  | -0.609434575265 |
| H | -2.062215765774 | -1.075005784156 | -0.251906715185 |
| H | -1.510504747473 | -0.977087641879 | -1.871524072893 |
| H | 3.540703892819  | 2.148059488768  | -1.316103207480 |
| H | 5.580939228752  | 3.288521196862  | -2.011658893332 |
| H | 7.636661965077  | 3.199646390602  | -0.606212876248 |
| H | 7.630332945622  | 1.910113488781  | 1.508542768587  |
| H | 6.475777834242  | 0.492515552033  | 3.122351665585  |
| H | 4.451752193430  | -0.729669736352 | 3.859648370459  |
| H | 2.356598433919  | -0.549905762054 | 2.562227681633  |
| H | -1.179584900395 | -3.288438365634 | -0.994986321523 |
| H | 1.184981233283  | -3.649299079195 | -0.327261513448 |
| H | 2.600325208744  | -1.718919824076 | 0.229687151250  |
| H | 1.974501427442  | 2.887216392049  | 0.521855253942  |
| H | -0.090269591068 | 3.425205410289  | -0.347665161005 |
| H | -1.680624592895 | 1.592032277805  | -0.979173238899 |

### 8-sigma-6'.xyz

35

-787.177464471

|   |                 |                 |                 |
|---|-----------------|-----------------|-----------------|
| C | 1.326767338639  | 0.551745111133  | -1.398149429342 |
| C | 1.240839714948  | -0.088278102693 | -0.116610907603 |
| C | 0.039571016116  | -0.398814110370 | 0.428517807108  |
| C | -1.220346195683 | -0.097923225814 | -0.271383537430 |
| C | -1.105421726394 | 0.562895980541  | -1.565117206296 |
| C | 0.118171159619  | 0.886012902101  | -2.121383448988 |
| C | 0.187133386406  | 1.536031387024  | -3.392220806716 |
| C | 1.404574386491  | 1.847646023663  | -3.940501745297 |
| C | 2.584878799544  | 1.513229603856  | -3.243574455495 |

|   |                 |                 |                 |
|---|-----------------|-----------------|-----------------|
| C | 2.560488703113  | 0.877796691695  | -2.004102294984 |
| C | 3.853692420544  | 0.545866955381  | -1.342794407456 |
| C | 5.773054729207  | -0.880198129088 | -0.826529401488 |
| C | 6.448100261684  | -2.114311228573 | -0.973167958879 |
| C | 5.904407327362  | -3.109923245164 | -1.754271142192 |
| C | 4.670136010809  | -2.918321690223 | -2.422503986937 |
| C | 3.985834194872  | -1.732678123214 | -2.303062498748 |
| C | 4.519788187859  | -0.687994927063 | -1.501595253428 |
| N | 4.413822633789  | 1.490689446719  | -0.578956278190 |
| C | 5.604571908408  | 1.348851190809  | 0.072906701960  |
| C | 6.292918629209  | 0.175483813757  | -0.037766559845 |
| H | -1.824777989288 | -1.017955484956 | -0.401537341428 |
| H | -1.899908810545 | 0.495930214175  | 0.370883111784  |
| H | 2.154213984636  | -0.323390840610 | 0.420588205420  |
| H | -0.020249538156 | -0.882856414394 | 1.398430645194  |
| H | -2.021562207657 | 0.800714004087  | -2.100633258567 |
| H | -0.737471383152 | 1.775700426005  | -3.909290013384 |
| H | 1.474271218944  | 2.341949209963  | -4.903445152698 |
| H | 3.544754844121  | 1.753673258515  | -3.693490372982 |
| H | 7.395062884365  | -2.262713566924 | -0.462541127284 |
| H | 6.426655779261  | -4.056173377359 | -1.862914917542 |
| H | 4.263589568083  | -3.717425460566 | -3.034914778662 |
| H | 3.042615433206  | -1.589955167477 | -2.820429958516 |
| H | 3.920589181575  | 2.375225496720  | -0.474208440354 |
| H | 5.932499754511  | 2.200989096056  | 0.653655321761  |
| H | 7.238153800322  | 0.060496381200  | 0.481800034558  |

### 8-sigma-6.xyz

35

-787.145942398

|   |                 |                 |                 |
|---|-----------------|-----------------|-----------------|
| C | 4.191527555530  | 1.408643970569  | -1.222101936517 |
| C | 3.639270198381  | 2.127511409637  | -2.313468022659 |
| C | 4.456147848189  | 2.772252568085  | -3.218629666361 |
| C | 5.861337518205  | 2.725490339766  | -3.085227115512 |
| C | 6.428489343765  | 2.011062454399  | -2.054398101455 |
| C | 5.617696042281  | 1.331505078105  | -1.108612971387 |
| C | 6.200812235126  | 0.562375547982  | -0.069295071724 |
| C | 5.420677027166  | -0.132475190398 | 0.828862233738  |
| C | 4.019695643858  | -0.070185487493 | 0.733818332184  |
| C | 3.405609999488  | 0.697890832971  | -0.249968337117 |
| C | 1.947742769437  | 0.827956597740  | -0.188628126897 |
| C | -0.365290689897 | 0.007605308005  | -0.011203207442 |
| C | -1.262662081111 | -1.062181011638 | 0.046164742885  |
| C | -0.810945251632 | -2.428329200767 | -0.096767424114 |
| C | 0.614055387668  | -2.655045392898 | -0.334752315708 |
| C | 1.493855026516  | -1.612721621912 | -0.372394406912 |
| C | 1.031982253183  | -0.280929913326 | -0.175448186840 |
| N | 1.416846980536  | 2.055031084130  | -0.112743760177 |
| C | 0.092630505435  | 2.362994665087  | 0.001579485371  |
| C | -0.820435397533 | 1.352990809361  | 0.076624664097  |
| H | -1.433325372961 | -2.932480819395 | -0.867554293170 |
| H | -1.159048845456 | -3.009567170813 | 0.786481817882  |
| H | 2.563832644541  | 2.160211956883  | -2.464539882141 |

|   |                 |                 |                 |
|---|-----------------|-----------------|-----------------|
| H | 4.011269496779  | 3.314704186766  | -4.048288727098 |
| H | 6.490181562229  | 3.241637901410  | -3.805206505225 |
| H | 7.509218640117  | 1.946926723867  | -1.954569724840 |
| H | 7.284836282606  | 0.522547660340  | 0.004196072936  |
| H | 5.876047361132  | -0.717480341767 | 1.621868221497  |
| H | 3.416394911352  | -0.584416457507 | 1.476863285415  |
| H | -2.321788298536 | -0.876074439374 | 0.202775314325  |
| H | 0.954183372848  | -3.674746354193 | -0.483716362233 |
| H | 2.544613505370  | -1.789810711232 | -0.567412127826 |
| H | 2.072564666957  | 2.836820422493  | -0.102190222662 |
| H | -0.149299312577 | 3.416834254661  | 0.046751090090  |
| H | -1.874918585957 | 1.574723754386  | 0.193352140702  |

### 8-sigma-7'.xyz

35

-787.175919013

|   |                 |                 |                 |
|---|-----------------|-----------------|-----------------|
| C | -0.355068085369 | 1.613185608567  | -1.113009516641 |
| C | 0.446196833336  | 1.579298888024  | 0.012275689459  |
| C | 1.725069333421  | 0.879280418290  | 0.036505513526  |
| C | 2.138536959166  | 0.200365410921  | -1.201137590762 |
| C | 1.358141389135  | 0.239736253882  | -2.309382696143 |
| C | 0.108449673635  | 0.939509191010  | -2.308170704771 |
| C | -0.689104874405 | 0.986513887747  | -3.467963492665 |
| C | -1.889345609956 | 1.664868390966  | -3.459769022249 |
| C | -2.360553654565 | 2.327826719571  | -2.296720148950 |
| C | -1.621349269102 | 2.305980051845  | -1.141012597536 |
| C | -2.149442673307 | 2.996368823140  | 0.068182125478  |
| C | -2.605188094368 | 4.932057167070  | 1.490417575525  |
| C | -2.479528604688 | 6.318838247933  | 1.738218897474  |
| C | -1.795270544789 | 7.119362847883  | 0.850921462318  |
| C | -1.207180774717 | 6.574184643315  | -0.316932324397 |
| C | -1.308812342752 | 5.231596382616  | -0.591174256014 |
| C | -2.011773856328 | 4.380749658351  | 0.303956100773  |
| N | -2.822969928429 | 2.250831873897  | 0.952408998998  |
| C | -3.397457065651 | 2.737001432393  | 2.090436469890  |
| C | -3.298390746549 | 4.068737692914  | 2.373762387557  |
| H | 1.716684898401  | 0.171815526067  | 0.889754149120  |
| H | 2.505624216716  | 1.588109852519  | 0.377280782610  |
| H | 0.143094477782  | 2.083801534090  | 0.926124757576  |
| H | 3.086282954201  | -0.329099907397 | -1.200808052549 |
| H | 1.665013657743  | -0.257880596903 | -3.224423511887 |
| H | -0.349185463354 | 0.485502199100  | -4.369102291352 |
| H | -2.497084554327 | 1.696434946277  | -4.359132756391 |
| H | -3.312652211349 | 2.848084895885  | -2.329720694120 |
| H | -2.928938884048 | 6.737912715957  | 2.633707529834  |
| H | -1.702306006441 | 8.183836139344  | 1.046053530649  |
| H | -0.671251693638 | 7.225822671885  | -1.000284241133 |
| H | -0.857185646808 | 4.819487034494  | -1.487665012610 |
| H | -2.930212848110 | 1.257332115445  | 0.758979074978  |
| H | -3.911502468896 | 2.013736345021  | 2.709642687087  |
| H | -3.755467239307 | 4.457961597063  | 3.277168455412  |

### 8-sigma-7.xyz

35



-787.159841790

|   |                 |                 |                 |
|---|-----------------|-----------------|-----------------|
| C | 4.324657012411  | 1.403838690640  | 0.841706875642  |
| C | 4.478455032112  | 1.937681095872  | -0.461034058101 |
| C | 5.673717053060  | 2.509591001488  | -0.852283065220 |
| C | 6.773373753795  | 2.559118385173  | 0.028497425914  |
| C | 6.667894820739  | 2.008785989212  | 1.287513844557  |
| C | 5.456210114612  | 1.413467386556  | 1.718876260697  |
| C | 5.364427800270  | 0.800400630220  | 2.995495453874  |
| C | 4.208542900417  | 0.173767922631  | 3.410192082491  |
| C | 3.085554201027  | 0.157541116219  | 2.570554419415  |
| C | 3.116591105902  | 0.777335957650  | 1.316347606820  |
| C | 1.859637519911  | 0.857867355084  | 0.599996660592  |
| C | -0.362391493204 | -0.034495876724 | -0.111334916408 |
| C | -1.284154107194 | -1.120135098342 | -0.221652026451 |
| C | -0.898179273171 | -2.383511431395 | 0.090359047101  |
| C | 0.481504136165  | -2.685431472043 | 0.507429182703  |
| C | 1.390240918786  | -1.553254449878 | 0.642085082248  |
| C | 0.965486107125  | -0.256027951447 | 0.416816029814  |
| N | 1.447756964382  | 2.044312253340  | 0.120792561099  |
| C | 0.224008840052  | 2.268924755419  | -0.431555803422 |
| C | -0.701248645024 | 1.263605354686  | -0.535727463599 |
| H | 0.492114551044  | -3.251871423653 | 1.461040788851  |
| H | 0.939618361436  | -3.434014994237 | -0.168961599115 |
| H | 3.670346672505  | 1.877999808385  | -1.184484179473 |
| H | 5.767722387394  | 2.913830466479  | -1.856206165058 |
| H | 7.705739534983  | 3.013179840313  | -0.294435394098 |
| H | 7.518194375483  | 2.010664221817  | 1.964639898105  |
| H | 6.231979467757  | 0.830075615056  | 3.649936197356  |
| H | 4.147676864357  | -0.283561625702 | 4.392489172302  |
| H | 2.156771081834  | -0.263838562891 | 2.943227615831  |
| H | -2.289891716208 | -0.911499568919 | -0.571968412145 |
| H | -1.596966703642 | -3.211259105320 | 0.016804763265  |
| H | 2.425806920684  | -1.759433996635 | 0.896129597777  |
| H | 2.053452150741  | 2.851263042436  | 0.262941300204  |
| H | 0.034864958323  | 3.287281380910  | -0.749308595907 |
| H | -1.677520495810 | 1.478346981752  | -0.954340885364 |

## 8-sigma-8'.xyz

35

-787.183805773

|   |                 |                 |                 |
|---|-----------------|-----------------|-----------------|
| C | -0.060479179721 | 2.133402018002  | -0.201859820600 |
| C | -0.179891964907 | 0.652261865475  | -0.310392070187 |
| C | 1.069074264124  | -0.118176924821 | -0.317751969140 |
| C | 2.302240129168  | 0.477188615033  | -0.255786714096 |
| C | 2.374333206736  | 1.875495067821  | -0.178313313794 |
| C | 1.238153612476  | 2.717032540536  | -0.150890079510 |
| C | 1.398565699111  | 4.122362380905  | -0.069583451000 |
| C | 0.289206593781  | 4.940742463386  | -0.036499591753 |
| C | -0.990583301682 | 4.370544424612  | -0.079367893943 |
| C | -1.173463794631 | 2.985324366299  | -0.159328774402 |
| C | -2.564273070455 | 2.453442999544  | -0.196751696203 |
| C | -4.593895548077 | 1.487601493816  | 0.769982492666  |
| C | -5.287539662172 | 0.987306963695  | 1.896687030332  |

|   |                 |                 |                 |
|---|-----------------|-----------------|-----------------|
| C | -4.675150991805 | 0.962959825030  | 3.129989523377  |
| C | -3.351424081658 | 1.439693295369  | 3.294583005631  |
| C | -2.646820181017 | 1.932361644682  | 2.222419555515  |
| C | -3.248715425101 | 1.961237411030  | 0.935764975564  |
| N | -3.199405723623 | 2.479390324817  | -1.373893737037 |
| C | -4.478889766276 | 2.047262758739  | -1.570774159445 |
| C | -5.185717451773 | 1.546320328692  | -0.516053841020 |
| H | -0.828292835472 | 0.240112330944  | 0.482632654924  |
| H | -0.732308323093 | 0.372656860390  | -1.227392631411 |
| H | 0.980965519497  | -1.199343059998 | -0.384482777497 |
| H | 3.211828099176  | -0.112953492164 | -0.268667220181 |
| H | 3.354738054309  | 2.344904668290  | -0.134820701394 |
| H | 2.400136150711  | 4.540806643533  | -0.034304362298 |
| H | 0.395841624722  | 6.018588430459  | 0.025772662050  |
| H | -1.863265761614 | 5.016931886892  | -0.042750510266 |
| H | -6.304972026696 | 0.627896938535  | 1.773951036852  |
| H | -5.212941761204 | 0.578428924194  | 3.991827215705  |
| H | -2.893090185297 | 1.418478752001  | 4.278634193850  |
| H | -1.637111572048 | 2.308390428562  | 2.355097349462  |
| H | -2.694703219482 | 2.840324260125  | -2.180808403591 |
| H | -4.858511301415 | 2.129822557061  | -2.580711351512 |
| H | -6.201642600521 | 1.198941320252  | -0.670147761309 |

### 8-sigma-8.xyz

35

-787.159491215

|   |                 |                 |                 |
|---|-----------------|-----------------|-----------------|
| C | 4.235510787984  | 1.344519217119  | 0.924752868888  |
| C | 4.306359874884  | 1.732945786320  | -0.439478584885 |
| C | 5.502110251501  | 2.131809181578  | -0.995609649759 |
| C | 6.685016988964  | 2.155420874964  | -0.221459169793 |
| C | 6.652258820116  | 1.764540039478  | 1.097697653965  |
| C | 5.438183338949  | 1.345183948618  | 1.702957357512  |
| C | 5.398224452149  | 0.919796719153  | 3.056169184800  |
| C | 4.222649611928  | 0.500095678993  | 3.635561502287  |
| C | 3.028561474279  | 0.499381625821  | 2.885785394226  |
| C | 3.025919675848  | 0.920419864682  | 1.566366200566  |
| C | 1.736134586881  | 0.964947034652  | 0.847122700668  |
| C | -0.242124015394 | 0.026403219969  | -0.200736632723 |
| C | -1.014173544238 | -1.124579201053 | -0.585427628185 |
| C | -0.598223858460 | -2.424069218626 | -0.343681103064 |
| C | 0.618456878331  | -2.630849449820 | 0.289410767219  |
| C | 1.477375282798  | -1.538565652555 | 0.722105532666  |
| C | 0.984757418300  | -0.163182291285 | 0.470931575682  |
| N | 1.233364600277  | 2.174681804325  | 0.527109691282  |
| C | 0.069264158272  | 2.397074754554  | -0.120536398262 |
| C | -0.702534132067 | 1.324130932496  | -0.497004960615 |
| H | 2.468031652433  | -1.690779189949 | 0.247349503520  |
| H | 1.734915845544  | -1.705631680665 | 1.784368382130  |
| H | 3.416304284824  | 1.708547938561  | -1.062344761534 |
| H | 5.536216960217  | 2.426180076716  | -2.041086811319 |
| H | 7.619598366864  | 2.475050491002  | -0.674321892192 |
| H | 7.559574878184  | 1.766777260535  | 1.697097159627  |
| H | 6.320028841452  | 0.928345423342  | 3.632853303069  |

|   |                 |                 |                 |
|---|-----------------|-----------------|-----------------|
| H | 4.200519638240  | 0.178504594570  | 4.672430382371  |
| H | 2.099312444425  | 0.203271808305  | 3.366344708417  |
| H | -1.962603381130 | -0.953579724137 | -1.088551100059 |
| H | -1.213427296205 | -3.261793002229 | -0.652095736930 |
| H | 0.969665135071  | -3.642454828446 | 0.476381340114  |
| H | 1.775264084598  | 2.988803338494  | 0.816861893199  |
| H | -0.194979352915 | 3.431241493072  | -0.301292488809 |
| H | -1.641941971488 | 1.486476105902  | -1.012595550199 |

### 9-Sigma-1'-a.xyz

35

-787.175959807

|   |                 |                 |                 |
|---|-----------------|-----------------|-----------------|
| C | -0.007238140750 | -0.416397640379 | 0.187712202684  |
| C | 0.004221019574  | -0.111598973884 | 1.544519211235  |
| C | 1.261264920460  | 0.064275376681  | 2.202300395697  |
| C | 2.472999228309  | -0.071537057010 | 1.473726188527  |
| C | 2.436467857847  | -0.378779320616 | 0.130111947307  |
| C | 1.195229456035  | -0.552152025383 | -0.506726556328 |
| C | 1.290618440387  | 0.340278755628  | 3.581041001042  |
| C | 0.129377240258  | 0.439892191448  | 4.372741772977  |
| C | -1.096703028239 | 0.289510207229  | 3.786657642167  |
| C | -1.264497398593 | 0.113364788089  | 2.322834724008  |
| C | -2.448316355164 | -0.765901973287 | 1.936062062481  |
| C | -2.447915358325 | -2.176275510566 | 2.181936580849  |
| C | -3.579423626022 | -2.969587894297 | 1.794705371804  |
| C | -4.691137903740 | -2.343871276032 | 1.181784488914  |
| C | -4.673336302417 | -0.987895485438 | 0.963626386373  |
| C | -3.553981019407 | -0.204893028860 | 1.338277579576  |
| C | -1.374176259769 | -2.837423663005 | 2.795248057673  |
| N | -1.414547648916 | -4.150443782774 | 2.998981142669  |
| C | -2.466596973447 | -4.939781625616 | 2.639696769862  |
| C | -3.551113530538 | -4.365316249369 | 2.040762495098  |
| H | -2.005081010315 | 0.368084283480  | 4.378988622763  |
| H | -0.948498843087 | -0.553695871562 | -0.336021746981 |
| H | 1.168070943880  | -0.798989178673 | -1.564389962839 |
| H | 3.356293583483  | -0.487407654098 | -0.435566969071 |
| H | 3.418089439353  | 0.069326451276  | 1.990565528329  |
| H | 2.259501381488  | 0.468114130684  | 4.058824322915  |
| H | 0.216596466169  | 0.627908856552  | 5.437380617063  |
| H | -4.392955073189 | -4.986409639661 | 1.754806557163  |
| H | -2.373060371996 | -5.995205966953 | 2.858911427539  |
| H | -0.615209122241 | -4.590379787876 | 3.448153830903  |
| H | -0.473105783916 | -2.340067904191 | 3.130902054223  |
| H | -3.576882319855 | 0.863316819740  | 1.140473784775  |
| H | -5.522192877237 | -0.499767178694 | 0.494291125091  |
| H | -5.547121326887 | -2.945323947469 | 0.890997821489  |
| H | -1.569250182397 | 1.145376613614  | 2.035688227953  |

### 9-Sigma-1'-b.xyz

35

-787.175258710

|   |                |                |                |
|---|----------------|----------------|----------------|
| C | 0.397474367019 | 0.446495617840 | 0.030673249422 |
| C | 0.193223429281 | 0.101953597726 | 1.361646873650 |

|   |                 |                 |                 |
|---|-----------------|-----------------|-----------------|
| C | 1.323470193321  | -0.004756898579 | 2.226482678294  |
| C | 2.630989896694  | 0.236080130954  | 1.727222865786  |
| C | 2.809798006051  | 0.576267519318  | 0.402466602584  |
| C | 1.690415567631  | 0.680949566228  | -0.440430011305 |
| C | 1.131876227095  | -0.331209182577 | 3.581507328093  |
| C | -0.136597171789 | -0.571416677138 | 4.145908008446  |
| C | -1.246150716155 | -0.499706953773 | 3.352726674320  |
| C | -1.180071960219 | -0.207962565022 | 1.896908563391  |
| C | -2.245261104672 | 0.825686176327  | 1.520325046087  |
| C | -3.462824841456 | 0.489709640857  | 0.848855650773  |
| C | -4.422166862014 | 1.522803635235  | 0.564419723239  |
| C | -4.153953609525 | 2.854014524435  | 0.956434906120  |
| C | -2.978633810253 | 3.149856850439  | 1.605270265496  |
| C | -2.032547039151 | 2.138301885024  | 1.884183378439  |
| C | -3.784613061494 | -0.814042549354 | 0.438095158721  |
| N | -4.929974458019 | -1.065605661164 | -0.186894423238 |
| C | -5.863386768110 | -0.113532514475 | -0.475606485066 |
| C | -5.622383507513 | 1.178263512838  | -0.107887075253 |
| H | -2.232366293035 | -0.687318316046 | 3.769827466391  |
| H | -0.444619704145 | 0.537682017344  | -0.649137937987 |
| H | 1.830270731166  | 0.952380932776  | -1.483088802937 |
| H | 3.804464635575  | 0.762688982764  | 0.010378626561  |
| H | 3.478724349560  | 0.146010416810  | 2.400525685746  |
| H | 2.008095905585  | -0.396844914614 | 4.222923545627  |
| H | -0.221334790417 | -0.808966858126 | 5.200802627919  |
| H | -6.357991851505 | 1.943021226375  | -0.332348967929 |
| H | -6.754191090417 | -0.451445364193 | -0.988446119903 |
| H | -5.121224005429 | -2.025016549496 | -0.465340481961 |
| H | -3.147245740763 | -1.674659937826 | 0.595545494246  |
| H | -1.113493088266 | 2.411031751543  | 2.395639463316  |
| H | -2.765893597042 | 4.169354804656  | 1.912698971766  |
| H | -4.883142484400 | 3.628898970949  | 0.740411528602  |
| H | -1.441628325942 | -1.180327915128 | 1.440340898424  |

## 9-Sigma-1.xyz

35

-787.158818860

|   |                 |                 |                 |
|---|-----------------|-----------------|-----------------|
| C | 1.040038200682  | -2.459270087522 | 2.713372248338  |
| C | 1.980553088731  | -3.057226953119 | 3.570355506449  |
| C | 2.413985701014  | -2.381058779254 | 4.688631326949  |
| N | 1.923306889451  | -1.152185285230 | 4.953506011039  |
| C | 1.026660518894  | -0.532905527590 | 4.169545668533  |
| C | 0.571525253153  | -1.158107956992 | 3.021146508168  |
| C | -0.440692976231 | -0.509746408827 | 2.169450021275  |
| C | -0.952983600681 | -1.251988647928 | 1.024589869630  |
| C | -0.411831663481 | -2.588355702832 | 0.754415621308  |
| C | 0.523585809343  | -3.152051673245 | 1.549126052644  |
| C | -0.800953061876 | 1.268931544444  | 0.301962938306  |
| C | -2.116454585793 | 1.550811364541  | 0.700605163791  |
| C | -2.750467413932 | 2.708739550049  | 0.273320097674  |
| C | -2.100430637717 | 3.632993785947  | -0.566316681496 |
| C | -0.809579777255 | 3.383360329497  | -0.974096067087 |
| C | -0.137591432162 | 2.205941858239  | -0.552296871472 |

|   |                 |                 |                 |
|---|-----------------|-----------------|-----------------|
| C | 1.186060358637  | 1.955669460348  | -0.970458565799 |
| C | 1.881805295586  | 0.810235851056  | -0.587281622872 |
| C | 1.266930906126  | -0.116432548020 | 0.231071605933  |
| C | -0.059469038912 | 0.073588401688  | 0.710277853745  |
| H | 2.368079631691  | -4.048974275113 | 3.365561740200  |
| H | 3.135844037722  | -2.776764077460 | 5.391873729502  |
| H | 0.700490456503  | 0.451235309271  | 4.485585922410  |
| H | -1.965998102877 | -1.070793502389 | 0.678482596523  |
| H | -0.820687992786 | -3.132668688550 | -0.091167662461 |
| H | 0.887481146304  | -4.154711263746 | 1.346306718904  |
| H | -2.669167642808 | 0.873755572687  | 1.345093927954  |
| H | -3.770089959660 | 2.900627643333  | 0.595460205354  |
| H | -2.616548921261 | 4.532565033644  | -0.887167088483 |
| H | -0.285839854514 | 4.080224978067  | -1.622707134414 |
| H | 1.671327011167  | 2.681885736332  | -1.618202575261 |
| H | 2.895531211834  | 0.641626153121  | -0.934185275859 |
| H | 1.809672550096  | -1.014945999575 | 0.506576694234  |
| H | -1.081063439408 | 0.209192022475  | 2.671442017366  |
| H | 2.248273826691  | -0.669608814357 | 5.787475895962  |

### 9-Sigma-2'.xyz

35

-787.179038951

|   |                 |                 |                 |
|---|-----------------|-----------------|-----------------|
| C | -0.050972889009 | 0.103891969846  | 0.004112471735  |
| C | 0.018698332651  | -0.049413040614 | 1.409631948431  |
| C | 1.297271777977  | -0.053078987403 | 2.056183734774  |
| C | 2.488690373694  | 0.096061807477  | 1.271150332084  |
| C | 2.367646977665  | 0.282766492017  | -0.092322028593 |
| C | 1.102401602584  | 0.272385426248  | -0.724135514287 |
| C | 1.321374749791  | -0.152013675796 | 3.456321516842  |
| N | 0.188361708987  | -0.270205186564 | 4.139892384374  |
| C | -1.046983041629 | -0.299258456430 | 3.562275925661  |
| C | -1.146849548399 | -0.187552858162 | 2.205054653414  |
| C | 3.839571034473  | 0.084604156253  | 1.878781441294  |
| C | 4.405467679577  | -1.053792989609 | 2.446993872560  |
| C | 5.723569628673  | -0.958832800219 | 3.048902845998  |
| C | 6.450090439945  | 0.276062785669  | 3.036280527362  |
| C | 5.928780549536  | 1.378238374013  | 2.450029411134  |
| C | 4.583783820184  | 1.358629015159  | 1.850343505303  |
| C | 6.279995560078  | -2.110526120226 | 3.628521820703  |
| C | 5.593794386156  | -3.312153408748 | 3.605163829429  |
| C | 4.322658439300  | -3.425503181731 | 2.990000446069  |
| C | 3.739814326416  | -2.324054077546 | 2.421631358406  |
| H | 4.611677718953  | 1.739960586085  | 0.812398196273  |
| H | 3.953834934606  | 2.128242218576  | 2.337400439336  |
| H | 2.776958053622  | -2.411012073401 | 1.929490983478  |
| H | 3.820077387759  | -4.387009511507 | 2.964876109134  |
| H | 6.044259210621  | -4.192002881315 | 4.056090441819  |
| H | 7.261451800461  | -2.050939648324 | 4.089173265475  |
| H | 7.434740909950  | 0.298929390850  | 3.493937308371  |
| H | 6.479467085193  | 2.313456604603  | 2.415905656124  |
| H | -2.126059648133 | -0.198292376015 | 1.739131220916  |
| H | -1.889501972343 | -0.404718642818 | 4.232775758984  |

|   |                 |                 |                 |
|---|-----------------|-----------------|-----------------|
| H | 0.245925693269  | -0.336654464765 | 5.153362708195  |
| H | 2.231361372355  | -0.128565259846 | 4.043372804548  |
| H | 3.257280356756  | 0.399458736935  | -0.704153904795 |
| H | 1.053973121402  | 0.397613710981  | -1.801484780582 |
| H | -1.021198604199 | 0.096439380893  | -0.483210289736 |

### 9-Sigma-2.xyz

35

-787.165958656

|   |                 |                 |                 |
|---|-----------------|-----------------|-----------------|
| C | 0.143875007201  | -0.083432282796 | -0.031128743033 |
| C | 0.042434825497  | 0.007843177366  | 1.369253998083  |
| C | 1.256833642556  | -0.029348312187 | 2.127550085136  |
| C | 2.496169460124  | -0.237636976469 | 1.475788137932  |
| C | 2.553882908590  | -0.377633087238 | 0.103733469063  |
| C | 1.371797716633  | -0.282020720244 | -0.648385465061 |
| C | 1.225469120178  | 0.183845645451  | 3.526613171838  |
| C | 0.040215190978  | 0.448472948909  | 4.192415521597  |
| C | -1.154436436726 | 0.476551892322  | 3.481727533711  |
| C | -1.207218994384 | 0.227283062173  | 2.082041358047  |
| C | -2.497575789876 | 0.019877333661  | 1.529997701889  |
| C | -3.657711050975 | 0.705232188315  | 2.055116963990  |
| C | -4.953867784322 | 0.107018834298  | 1.966436805055  |
| C | -5.125905632989 | -1.141989682276 | 1.275335610108  |
| C | -4.112311659130 | -1.629699232367 | 0.533544015186  |
| C | -2.772355766074 | -0.976649525562 | 0.456348440558  |
| C | -3.549928598970 | 1.987286536213  | 2.600126436258  |
| N | -4.631105011083 | 2.597170147851  | 3.095711152026  |
| C | -5.860660302340 | 2.025959878747  | 3.108113219904  |
| C | -6.042498064906 | 0.786771139222  | 2.545410810274  |
| H | -4.254925699940 | -2.502066802930 | -0.097937604658 |
| H | -0.728899048908 | 0.031816510136  | -0.660770318148 |
| H | 1.413273415869  | -0.354726977754 | -1.731421625321 |
| H | 3.505821227525  | -0.537701565182 | -0.393451194968 |
| H | 3.402574349810  | -0.266813190319 | 2.074476515000  |
| H | 2.158713789803  | 0.133960725074  | 4.082092214583  |
| H | 0.029528828289  | 0.587748618187  | 5.268263808525  |
| H | -2.077651542002 | 0.562512215460  | 4.043418185902  |
| H | -7.034979535413 | 0.351115521984  | 2.531496089267  |
| H | -6.657963736867 | 2.607972277089  | 3.553008921676  |
| H | -4.529302416637 | 3.539642004375  | 3.465748819647  |
| H | -2.628458928761 | 2.556574022789  | 2.602057899528  |
| H | -2.764044702198 | -0.461084576345 | -0.525276882472 |
| H | -6.097758344154 | -1.624270031814 | 1.294562671702  |
| H | -1.974043718561 | -1.722899654091 | 0.390392477325  |

### 9-Sigma-3'.xyz

35

-787.181442376

|   |                 |                 |                |
|---|-----------------|-----------------|----------------|
| C | -0.055195140274 | 0.080695516581  | 0.001849206191 |
| C | -0.008358508476 | 0.004944549933  | 1.413565889789 |
| C | 1.265248759028  | -0.024720569127 | 2.071440862023 |
| C | 2.471083332736  | 0.027511139537  | 1.303536597912 |

|   |                 |                 |                 |
|---|-----------------|-----------------|-----------------|
| C | 2.374435951506  | 0.095446714076  | -0.069651797677 |
| C | 1.115991757505  | 0.120610701376  | -0.718368074762 |
| C | 1.278180737344  | -0.114049985116 | 3.471448553195  |
| N | 0.137521504805  | -0.160379008666 | 4.152228041641  |
| C | -1.095371534307 | -0.127801460647 | 3.566611664629  |
| C | -1.183423857352 | -0.047234108437 | 2.206440012183  |
| C | 3.811014898485  | -0.002688870521 | 1.962219985170  |
| C | 4.409120677793  | 1.227422863241  | 2.447002108538  |
| C | 5.712120666262  | 1.197549873079  | 3.080445818732  |
| C | 6.381528723863  | -0.002433789374 | 3.198874212828  |
| C | 5.818730550311  | -1.253876234717 | 2.705578640606  |
| C | 4.484790592653  | -1.175420645824 | 2.083271256095  |
| C | 6.303354764719  | 2.405551829603  | 3.569289289382  |
| C | 5.642468254682  | 3.600337951475  | 3.436493406585  |
| C | 4.376829571591  | 3.622607385659  | 2.809061088787  |
| C | 3.772266901933  | 2.468868054627  | 2.324805321929  |
| H | 6.546317491995  | -1.716290402918 | 2.010176940296  |
| H | 5.822703566671  | -1.992956606092 | 3.530111031022  |
| H | 2.801777519242  | 2.539153407935  | 1.845071392918  |
| H | 3.858547547374  | 4.571382297569  | 2.699863205875  |
| H | 6.081855571129  | 4.522249688252  | 3.803016736520  |
| H | 7.280502248102  | 2.352813244754  | 4.040823363009  |
| H | 7.362251686007  | -0.033118423564 | 3.668122160136  |
| H | 4.047486239544  | -2.100270917709 | 1.717913923861  |
| H | -2.160384652943 | -0.024837296706 | 1.735913056298  |
| H | -1.945897526968 | -0.171806707298 | 4.233888824511  |
| H | 0.185453808398  | -0.226582033624 | 5.165987962273  |
| H | 2.189846766327  | -0.153182299790 | 4.055431642142  |
| H | 3.280193636065  | 0.135061034766  | -0.667779186922 |
| H | 1.084610245531  | 0.174514084599  | -1.802639821662 |
| H | -1.018900504281 | 0.104622431119  | -0.498272979002 |

### 9-Sigma-3.xyz

35

-787.144818591

|   |                 |                 |                 |
|---|-----------------|-----------------|-----------------|
| C | -0.100820515249 | -0.135900580194 | -0.023645379158 |
| C | 0.010442769806  | 0.051713920364  | 1.353326853278  |
| C | 1.320777223091  | 0.055586579287  | 1.945714524052  |
| C | 2.513341457969  | -0.200921823823 | 1.185004860890  |
| C | 2.386797762416  | -0.337130411098 | -0.174012318298 |
| C | 1.084159911356  | -0.295723365136 | -0.840638109569 |
| C | 1.397688720687  | 0.343748844612  | 3.326054790206  |
| N | 0.288520874162  | 0.544523854030  | 4.022341725417  |
| C | -0.976455961639 | 0.486986389457  | 3.510817605437  |
| C | -1.135765236119 | 0.250224149493  | 2.175127150878  |
| C | 3.818090933798  | -0.410518296665 | 1.854715932432  |
| C | 4.924732316181  | 0.464838762158  | 1.621841156370  |
| C | 6.182846135909  | 0.142761894952  | 2.226462448079  |
| C | 6.291106447079  | -1.010449684601 | 3.047932012599  |
| C | 5.201559640506  | -1.820887292249 | 3.277583817184  |
| C | 3.961785406710  | -1.519659248310 | 2.679505311664  |
| C | 7.294041016072  | 0.994187342302  | 2.003354524114  |
| C | 7.172570191516  | 2.127148360126  | 1.225282102037  |

|   |                 |                 |                 |
|---|-----------------|-----------------|-----------------|
| C | 5.927675861499  | 2.458259902571  | 0.649146438340  |
| C | 4.825389630487  | 1.651012364037  | 0.848592641131  |
| H | 0.956690736644  | -1.151500182969 | -1.534162314597 |
| H | 1.084076518552  | 0.525689849696  | -1.594961358812 |
| H | 3.869164654530  | 1.940046636169  | 0.422152765564  |
| H | 5.832459217295  | 3.361396845698  | 0.052489517196  |
| H | 8.031631772963  | 2.772614575098  | 1.063964720161  |
| H | 8.246556145298  | 0.741446106936  | 2.463120286912  |
| H | 7.253376228715  | -1.243740691089 | 3.497497342525  |
| H | 5.291974914310  | -2.703021139046 | 3.904514706650  |
| H | 3.119745365680  | -2.190195957597 | 2.833003668179  |
| H | -2.130635490850 | 0.223439896628  | 1.745311300125  |
| H | -1.786954262261 | 0.652186353328  | 4.208151029812  |
| H | 0.386755392214  | 0.764450073076  | 5.013040383092  |
| H | 2.337336264087  | 0.429943201984  | 3.857515324460  |
| H | 3.262403769061  | -0.515813188276 | -0.790982665995 |
| H | -1.075398748835 | -0.147475483800 | -0.503573101621 |

### 9-Sigma-4'.xyz

35

-787.186010761

|   |                 |                 |                 |
|---|-----------------|-----------------|-----------------|
| C | -0.047386002309 | 0.095227893829  | 0.018360039276  |
| C | -0.046387585416 | -0.099114509827 | 1.421858819110  |
| C | 1.190578547054  | -0.042877816168 | 2.141339059096  |
| C | 2.411250833219  | 0.214575697577  | 1.432238056534  |
| C | 2.353912569207  | 0.430734377858  | 0.066432920793  |
| C | 1.130215479198  | 0.360418084546  | -0.637957195852 |
| C | 1.139687056856  | -0.180898652234 | 3.536837319492  |
| N | -0.020569686332 | -0.399249456614 | 4.147480443285  |
| C | -1.214884014672 | -0.491421905250 | 3.496888595795  |
| C | -1.244249475869 | -0.337849958124 | 2.139937637157  |
| C | 3.733812191403  | 0.143373087394  | 2.084900514380  |
| C | 4.646682610274  | 1.237578055248  | 2.020476587801  |
| C | 5.972895661577  | 1.062582771947  | 2.523318114866  |
| C | 6.380445052434  | -0.236459327472 | 3.122009479078  |
| C | 5.344615107014  | -1.267815603022 | 3.209227921516  |
| C | 4.083813918875  | -1.076339517440 | 2.720789321277  |
| C | 6.874506579712  | 2.123267072460  | 2.450891322959  |
| C | 6.481240959934  | 3.344947963028  | 1.914853427286  |
| C | 5.168768417272  | 3.540311583734  | 1.450915956200  |
| C | 4.260421640086  | 2.504627773725  | 1.504253291666  |
| H | 6.807649437774  | -0.078110606421 | 4.127943298758  |
| H | 7.238644149806  | -0.664654984037 | 2.571648304365  |
| H | 3.240571894476  | 2.663822750251  | 1.172120662182  |
| H | 4.868632900692  | 4.508055075542  | 1.061346456432  |
| H | 7.194633657967  | 4.163048213142  | 1.868947785496  |
| H | 7.887379151022  | 1.993824700126  | 2.822576829614  |
| H | 5.616400068786  | -2.222771843344 | 3.651093236280  |
| H | 3.359706293256  | -1.884236183606 | 2.753306228589  |
| H | -2.192489552709 | -0.392726665224 | 1.616595750577  |
| H | -2.085720860855 | -0.674527441923 | 4.112267296018  |
| H | -0.017337959281 | -0.493900686406 | 5.160711706033  |
| H | 2.007941366945  | -0.105642294261 | 4.179737247004  |



|   |                 |                |                 |
|---|-----------------|----------------|-----------------|
| H | 3.270273561805  | 0.609355683344 | -0.487832866125 |
| H | 1.134084970599  | 0.512706795779 | -1.712801266012 |
| H | -0.986734402276 | 0.038990059446 | -0.523243422595 |

### 9-Sigma-4.xyz

35

-787.175581686

|   |                 |                 |                 |
|---|-----------------|-----------------|-----------------|
| C | -0.050204107541 | -0.156042321974 | -0.067068225285 |
| C | 0.006156503479  | -0.050259301982 | 1.414074605378  |
| C | 1.256586978964  | 0.056561784908  | 2.069267224670  |
| C | 2.503956683930  | 0.035001025945  | 1.313622413552  |
| C | 2.433520367171  | 0.117656153506  | -0.102410923203 |
| C | 1.242366380482  | -0.006483193700 | -0.754721826678 |
| C | 1.261290236836  | 0.292332852185  | 3.448223871516  |
| N | 0.109551619310  | 0.321242756544  | 4.122254567036  |
| C | -1.096885308019 | 0.143984829179  | 3.539082954617  |
| C | -1.168271414727 | -0.031449602689 | 2.175721032638  |
| C | 3.770012391225  | -0.150336101425 | 1.975369474009  |
| C | 4.973911705067  | 0.548022463362  | 1.584541149526  |
| C | 6.219994626137  | 0.101144229707  | 2.128239666158  |
| C | 6.240698576813  | -0.984191859515 | 3.039756095254  |
| C | 5.074830033583  | -1.607495415422 | 3.443037386519  |
| C | 3.845870405169  | -1.181182857019 | 2.930554420926  |
| C | 7.418201922389  | 0.774344892612  | 1.782068894800  |
| C | 7.391644231775  | 1.871882029068  | 0.947863299714  |
| C | 6.159652101488  | 2.344177307899  | 0.454433239017  |
| C | 4.974664451659  | 1.704850833289  | 0.774206554764  |
| H | 1.231755026237  | -0.055148350199 | -1.840206998911 |
| H | 4.039668871175  | 2.123718180101  | 0.415347052846  |
| H | 6.134632949805  | 3.228752678106  | -0.175869271744 |
| H | 8.312846784590  | 2.385328852098  | 0.688078477747  |
| H | 8.356421396345  | 0.420705546985  | 2.201679391518  |
| H | 7.198537829245  | -1.318330913393 | 3.431027787466  |
| H | 5.105815848973  | -2.442343686332 | 4.135764358500  |
| H | 2.951270195044  | -1.736557196398 | 3.196157430503  |
| H | -2.139669416622 | -0.137211293742 | 1.705158158423  |
| H | -1.961160077876 | 0.176523691790  | 4.190106801548  |
| H | 0.142489278879  | 0.504625004525  | 5.123873537470  |
| H | 2.159040768715  | 0.495593346114  | 4.017812227535  |
| H | 3.355073623360  | 0.146285569822  | -0.672463777481 |
| H | -0.494511218567 | -1.124223831440 | -0.360175507012 |
| H | -0.771018060553 | 0.576142644024  | -0.466660789597 |

### 9-Sigma-5'.xyz

35

-787.187459788

|   |                 |                 |                 |
|---|-----------------|-----------------|-----------------|
| C | -0.076914270160 | -0.361618510416 | 0.062521347517  |
| C | -0.070511044328 | 0.047519113327  | 1.416197241285  |
| C | 1.174632069602  | 0.112849934516  | 2.124820545992  |
| C | 2.396877978269  | -0.227338984739 | 1.460403602835  |
| C | 2.335789080241  | -0.633653871537 | 0.142162419826  |
| C | 1.105614227237  | -0.699091164088 | -0.553606124652 |

|   |                 |                 |                 |
|---|-----------------|-----------------|-----------------|
| C | 1.139201385225  | 0.486065057425  | 3.476905149309  |
| N | -0.016039684162 | 0.787721221982  | 4.060644548843  |
| C | -1.220424557181 | 0.756915204712  | 3.418393862481  |
| C | -1.263387004884 | 0.388514758909  | 2.104673538702  |
| C | 3.711997119871  | -0.113672219943 | 2.147757380184  |
| C | 4.487148784224  | -1.273627334289 | 2.475567539406  |
| C | 5.777976206211  | -1.127501254941 | 3.067032690588  |
| C | 6.268747782322  | 0.147408134972  | 3.342961354435  |
| C | 5.498947177227  | 1.262853108132  | 3.039262893796  |
| C | 4.230686402535  | 1.135344309493  | 2.446581279127  |
| C | 6.576856779630  | -2.341087035743 | 3.389594694969  |
| C | 5.966690882977  | -3.641404423452 | 3.099124665641  |
| C | 4.710623232588  | -3.746908120525 | 2.562790694458  |
| C | 3.989771463690  | -2.577726559385 | 2.265705012335  |
| H | 7.558022500389  | -2.298972106100 | 2.881760904400  |
| H | 6.873670822146  | -2.332619994404 | 4.454325422608  |
| H | 2.989740720207  | -2.688624297768 | 1.854937763998  |
| H | 4.262924122654  | -4.715289477695 | 2.367412958779  |
| H | 6.545557452611  | -4.531498874799 | 3.331139473044  |
| H | 7.249665232420  | 0.265886469204  | 3.794400426807  |
| H | 5.884755043933  | 2.255733289871  | 3.251944744348  |
| H | 3.666570031095  | 2.029617103379  | 2.197962626905  |
| H | -2.218786076321 | 0.354625195759  | 1.592082417381  |
| H | -2.086518661292 | 1.028052214695  | 4.007553274660  |
| H | -0.001454352798 | 1.053610186266  | 5.042171178363  |
| H | 2.022542275994  | 0.539976133461  | 4.101101068271  |
| H | 3.252015830389  | -0.889228822786 | -0.382576310433 |
| H | 1.105932902247  | -1.016267482291 | -1.592265776358 |
| H | -1.019027084665 | -0.408821827357 | -0.475136006088 |

### 9-Sigma-5.xyz

35

-787.150196660

|   |                 |                 |                 |
|---|-----------------|-----------------|-----------------|
| C | -0.098643978628 | 0.031069976096  | 0.014551789180  |
| C | -0.041438678081 | 0.062097218643  | 1.385865411145  |
| C | 1.248103150835  | 0.001812994479  | 2.032583754452  |
| C | 2.476300838712  | 0.037767584255  | 1.261638963893  |
| C | 2.352267329429  | -0.039441355048 | -0.125398629118 |
| C | 1.096102229836  | -0.031886595782 | -0.728961030598 |
| C | 1.295800317973  | -0.247359357381 | 3.383408571033  |
| N | 0.140364964409  | -0.286319017776 | 4.149847015543  |
| C | -1.056924192133 | -0.101797717012 | 3.663946651371  |
| C | -1.266458723880 | 0.120357439785  | 2.239179632220  |
| C | 3.760774705270  | 0.240759314988  | 1.922775663939  |
| C | 4.929477544447  | -0.536518247526 | 1.602743282485  |
| C | 6.178387477862  | -0.155455034030 | 2.190445323250  |
| C | 6.231107079610  | 0.950043197064  | 3.079627695824  |
| C | 5.093775888159  | 1.659168481973  | 3.402858170353  |
| C | 3.862478394696  | 1.302845991344  | 2.830653994114  |
| C | 7.343935373967  | -0.906893925709 | 1.899923802906  |
| C | 7.284429630328  | -2.011417250753 | 1.075389429835  |
| C | 6.048485109704  | -2.413332429504 | 0.530324350692  |
| C | 4.895230264874  | -1.697934116895 | 0.793565653708  |

|   |                 |                 |                 |
|---|-----------------|-----------------|-----------------|
| H | -1.779993624311 | 1.098802723486  | 2.152936358867  |
| H | -2.046483338369 | -0.583660663459 | 1.904384157368  |
| H | 3.952219634375  | -2.050610671052 | 0.387973457581  |
| H | 5.997190986591  | -3.299722184989 | -0.095992346663 |
| H | 8.183528079745  | -2.581703220915 | 0.859335291095  |
| H | 8.286159170186  | -0.604313037927 | 2.350168809564  |
| H | 7.190700875418  | 1.229951573597  | 3.507480370433  |
| H | 5.144945852424  | 2.508532901314  | 4.077102449159  |
| H | 2.992159871548  | 1.921399290555  | 3.031093967070  |
| H | -1.889406811918 | -0.122022269780 | 4.361034273701  |
| H | 0.246275258766  | -0.465540669985 | 5.148602364770  |
| H | 2.207571999217  | -0.465247155350 | 3.925544851597  |
| H | 3.241143191946  | -0.017518231130 | -0.746671422506 |
| H | 1.036886551681  | -0.037629223744 | -1.813507784697 |
| H | -1.054569244191 | 0.054027004290  | -0.499370999480 |

### 9-Sigma-6'.xyz

35

-787.181271104

|   |                 |                 |                 |
|---|-----------------|-----------------|-----------------|
| C | -0.055529286066 | -0.107624367140 | 0.001633716164  |
| C | -0.034121720652 | 0.031780905168  | 1.408834223795  |
| C | 1.225822090672  | 0.040844079342  | 2.093847861790  |
| C | 2.444960575775  | -0.087669087826 | 1.355804545551  |
| C | 2.371848764709  | -0.223371492099 | -0.014625021871 |
| C | 1.127319511383  | -0.233607900355 | -0.689197482613 |
| C | 1.209942158792  | 0.166303695409  | 3.491201163334  |
| N | 0.057672971550  | 0.280554835860  | 4.143452400680  |
| C | -1.161854305969 | 0.284170171357  | 3.529891743939  |
| C | -1.222969778718 | 0.160494972526  | 2.171682043013  |
| C | 3.773970116117  | -0.047843313896 | 2.035641870462  |
| C | 4.495727490165  | -1.230191079708 | 2.319574441683  |
| C | 5.800485275497  | -1.101065594519 | 2.937108931734  |
| C | 6.332034897749  | 0.187882990621  | 3.252156803481  |
| C | 5.604214156720  | 1.313700184357  | 2.968917448351  |
| C | 4.334739487453  | 1.185538546537  | 2.362965812626  |
| C | 6.527705753800  | -2.241717848643 | 3.216244627759  |
| C | 6.028015952165  | -3.578308488107 | 2.914474355656  |
| C | 4.692406218065  | -3.654539897796 | 2.296599574868  |
| C | 3.978086616337  | -2.536652356093 | 2.021310324762  |
| H | 6.069150627545  | -4.186371824777 | 3.839155420185  |
| H | 6.781215091139  | -4.101745585222 | 2.293354979515  |
| H | 2.995821778187  | -2.616396330639 | 1.567417208271  |
| H | 4.293420566432  | -4.638347018491 | 2.068831809451  |
| H | 7.509437742905  | -2.156111543964 | 3.676725497813  |
| H | 7.313188189953  | 0.252199211148  | 3.713360452759  |
| H | 5.990478348816  | 2.301358196385  | 3.198038143579  |
| H | 3.773605804513  | 2.088378569441  | 2.134867641816  |
| H | -2.189527790572 | 0.160066504312  | 1.679610425974  |
| H | -2.024404076493 | 0.385550921399  | 4.175079586995  |
| H | 0.086138088000  | 0.369127272389  | 5.156165740889  |
| H | 2.108103674679  | 0.173054819455  | 4.096551758354  |
| H | 3.286970927681  | -0.318523215994 | -0.592143827717 |
| H | 1.116467500226  | -0.340361200759 | -1.769937777869 |

H -1.008968190822 -0.114625877861 -0.518276459654

**9-Sigma-6.xyz**

35

-787.152960015

|   |                 |                 |                 |
|---|-----------------|-----------------|-----------------|
| C | -0.068134278306 | 0.103754554225  | -0.003284798775 |
| C | 0.000562436312  | 0.010701084443  | 1.410160497972  |
| C | 1.285028644992  | -0.042335981699 | 2.070163052277  |
| C | 2.465115227968  | 0.056241762467  | 1.325686011764  |
| C | 2.342008037625  | 0.105972640914  | -0.085616214512 |
| C | 1.105875064618  | 0.131024155460  | -0.738663496579 |
| C | 1.307175909943  | -0.244948714049 | 3.486525695229  |
| N | 0.213606774391  | -0.300061491775 | 4.185025271654  |
| C | -1.114914833149 | -0.157192423836 | 3.634380253399  |
| C | -1.144898472092 | -0.026101650294 | 2.179376718269  |
| C | 3.793373444189  | 0.210187989858  | 1.946599700018  |
| C | 4.861763115783  | -0.695293472940 | 1.646475237201  |
| C | 6.159386048519  | -0.414740294476 | 2.181779017836  |
| C | 6.344160303274  | 0.723918108247  | 3.010554905031  |
| C | 5.292390961902  | 1.560089324628  | 3.310815909602  |
| C | 4.014090881779  | 1.304441133830  | 2.775204025844  |
| C | 7.232667518398  | -1.293400083745 | 1.887631783389  |
| C | 7.036059824048  | -2.413052818307 | 1.106673314101  |
| C | 5.750330083510  | -2.706966836201 | 0.604669208312  |
| C | 4.683255782752  | -1.874563577269 | 0.878433099583  |
| H | -1.724492389152 | -1.025092960377 | 3.938164753665  |
| H | -1.621853727597 | 0.707576816067  | 4.097522669679  |
| H | 3.693963378093  | -2.145720170048 | 0.519926103782  |
| H | 5.594864477926  | -3.603162333554 | 0.010231599061  |
| H | 7.866319795791  | -3.079271467306 | 0.888930391803  |
| H | 8.216081194434  | -1.072636615732 | 2.295786288725  |
| H | 7.335967480570  | 0.925739209590  | 3.408072418366  |
| H | 5.442030619941  | 2.431306769347  | 3.941549838742  |
| H | 3.206711316680  | 2.006848576724  | 2.967729365393  |
| H | -2.126876740047 | 0.041692328626  | 1.718173723948  |
| H | 0.278387033426  | -0.477876698848 | 5.185823595049  |
| H | 2.243169909146  | -0.388230008727 | 4.016492371817  |
| H | 3.250007686462  | 0.174360911605  | -0.678117906913 |
| H | 1.072635878940  | 0.199001909109  | -1.820778679984 |
| H | -1.036793053466 | 0.153544381577  | -0.491153947671 |

**9-Sigma-7'.xyz**

35

-787.181721827

|   |                 |                 |                 |
|---|-----------------|-----------------|-----------------|
| C | -0.061218909146 | -0.191618090370 | 0.035561141893  |
| C | -0.056701097341 | 0.079151652870  | 1.423755256422  |
| C | 1.186290271551  | 0.074219630460  | 2.138539648252  |
| C | 2.410598803933  | -0.191147708662 | 1.442281824766  |
| C | 2.350638387879  | -0.466166535768 | 0.089481722326  |
| C | 1.121645057410  | -0.465325675281 | -0.610309650816 |
| C | 1.143865278381  | 0.299435989584  | 3.522906607974  |
| N | -0.013875612037 | 0.538523410478  | 4.130068865608  |

|   |                 |                 |                 |
|---|-----------------|-----------------|-----------------|
| C | -1.214921123145 | 0.580399427084  | 3.482736624858  |
| C | -1.252036714187 | 0.349725750676  | 2.137915302699  |
| C | 3.727022592580  | -0.118001557537 | 2.124860119223  |
| C | 4.580562497341  | -1.282090592216 | 2.229287041309  |
| C | 5.905075867752  | -1.156973239159 | 2.806501844149  |
| C | 6.319075293518  | 0.095680932312  | 3.284482797765  |
| C | 5.469161707314  | 1.183656373502  | 3.202961876604  |
| C | 4.182030083696  | 1.082045554497  | 2.626130177898  |
| C | 6.769384673544  | -2.299484391355 | 2.894252617068  |
| C | 6.360109468617  | -3.521518967332 | 2.478543918493  |
| C | 5.005201792236  | -3.719390579170 | 1.934854847225  |
| C | 4.154284415067  | -2.536335921426 | 1.841461321125  |
| H | 5.046277098151  | -4.192426127071 | 0.933922318544  |
| H | 4.462213626322  | -4.497715672738 | 2.505562224486  |
| H | 3.147643427687  | -2.678396743212 | 1.458018499563  |
| H | 7.015208415910  | -4.384914078093 | 2.543352508877  |
| H | 7.762322548417  | -2.156735846324 | 3.310737912172  |
| H | 7.308158036922  | 0.204023738854  | 3.719018254331  |
| H | 5.798904264461  | 2.149644886175  | 3.574920148681  |
| H | 3.567527491173  | 1.973972257458  | 2.547999491767  |
| H | -2.204440570175 | 0.369579301658  | 1.619281724475  |
| H | -2.083274914480 | 0.791542867890  | 4.092686328102  |
| H | -0.003737304044 | 0.694884638627  | 5.135140413240  |
| H | 2.023102629123  | 0.283037234322  | 4.154827593970  |
| H | 3.268231915129  | -0.655621108038 | -0.460145148688 |
| H | 1.124064716197  | -0.674976800514 | -1.675797391371 |
| H | -1.003022045372 | -0.183012435206 | -0.504739838124 |

### 9-Sigma-8'.xyz

35

-787.187475206

|   |                 |                 |                 |
|---|-----------------|-----------------|-----------------|
| C | -0.081283654373 | -0.231810386478 | 0.047524942241  |
| C | -0.051805166559 | 0.049899568627  | 1.432737083437  |
| C | 1.209026180809  | 0.081931529862  | 2.115346095199  |
| C | 2.422375835191  | -0.163064782116 | 1.396632434424  |
| C | 2.340972038832  | -0.430016023820 | 0.045797961358  |
| C | 1.095370459093  | -0.466708336051 | -0.625433500906 |
| C | 1.201075400911  | 0.354233419834  | 3.491805232999  |
| N | 0.055487056943  | 0.582258271710  | 4.125452064477  |
| C | -1.164768061694 | 0.569423524896  | 3.512830844291  |
| C | -1.233512330320 | 0.304447011475  | 2.175409720787  |
| C | 3.750144238035  | -0.095730065340 | 2.076114500009  |
| C | 4.456103315140  | -1.254634800312 | 2.431951151056  |
| C | 5.727945418171  | -1.120060325434 | 3.063951453535  |
| C | 6.275570932472  | 0.161059545097  | 3.324606523317  |
| C | 5.570630878507  | 1.289536668999  | 2.965392305037  |
| C | 4.317955976547  | 1.155180785316  | 2.347028588405  |
| C | 6.440782442589  | -2.280587142902 | 3.435766402208  |
| C | 5.968207529129  | -3.584962523971 | 3.220476556843  |
| C | 4.750596505415  | -3.754688783492 | 2.615701500896  |
| C | 3.922580826929  | -2.623373060351 | 2.181788478669  |
| H | 2.921466896811  | -2.744972589740 | 2.633364453212  |
| H | 3.702347303363  | -2.769442257909 | 1.108981593202  |

|   |                 |                 |                 |
|---|-----------------|-----------------|-----------------|
| H | 4.359161060324  | -4.752535618777 | 2.435609021817  |
| H | 6.565062226563  | -4.435359285061 | 3.531454033711  |
| H | 7.407957054729  | -2.149826684374 | 3.916651513408  |
| H | 7.246521838398  | 0.236709875197  | 3.805541023926  |
| H | 5.974212278957  | 2.279117918169  | 3.154185538333  |
| H | 3.770012310733  | 2.049979358066  | 2.062860512736  |
| H | -2.200356240806 | 0.289824970721  | 1.683992229123  |
| H | -2.020967088909 | 0.773444304605  | 4.142065648708  |
| H | 0.090735034109  | 0.777409526238  | 5.122790872047  |
| H | 2.100164903296  | 0.389220295819  | 4.094885597267  |
| H | 3.250795421588  | -0.601717952320 | -0.522793511189 |
| H | 1.078494054135  | -0.678505161656 | -1.690522367224 |
| H | -1.035189728251 | -0.256798164792 | -0.470811848479 |

### 9-Sigma-8.xyz

35

-787.137010586

|   |                 |                 |                 |
|---|-----------------|-----------------|-----------------|
| C | -0.026335039928 | 0.117721972042  | -0.040935320486 |
| C | -0.001439835424 | 0.036902643777  | 1.392405240809  |
| C | 1.254464225707  | 0.061596273296  | 2.107383474159  |
| C | 2.443873289121  | 0.068567698969  | 1.391968694263  |
| C | 2.374889003024  | 0.101967280759  | -0.015135868055 |
| C | 1.155898202791  | 0.155745438053  | -0.728737979546 |
| C | 1.244183826569  | 0.066621322901  | 3.596972968751  |
| N | -0.042066741163 | -0.245876436506 | 4.180054721917  |
| C | -1.149575581624 | -0.357838876370 | 3.518487025788  |
| C | -1.168532439242 | -0.183478930644 | 2.093358410005  |
| C | 3.780498998074  | 0.091392870024  | 2.040565043243  |
| C | 4.648516083307  | -1.038652042936 | 1.924888342607  |
| C | 5.968972333217  | -0.943902001444 | 2.469633941766  |
| C | 6.370998336160  | 0.249167521811  | 3.122642162597  |
| C | 5.506932890283  | 1.319461388779  | 3.235460979568  |
| C | 4.211954542445  | 1.240307093070  | 2.689966990211  |
| C | 6.846856192277  | -2.050390640702 | 2.347029959873  |
| C | 6.442353112751  | -3.210260070310 | 1.713429403303  |
| C | 5.138394028972  | -3.309307938023 | 1.190153122320  |
| C | 4.253464471660  | -2.250812745258 | 1.302534331864  |
| H | 1.991264659404  | -0.631207837255 | 4.004912179152  |
| H | 1.521047475271  | 1.054056029519  | 3.999133127299  |
| H | 3.239887378545  | -2.364335647446 | 0.929002712227  |
| H | 4.818724584631  | -4.227776218937 | 0.705756489171  |
| H | 7.126036527142  | -4.049930987866 | 1.625822691062  |
| H | 7.848930216370  | -1.972266536560 | 2.761905928087  |
| H | 7.375337913096  | 0.309618565237  | 3.534623967992  |
| H | 5.823657122515  | 2.232077458168  | 3.731454651668  |
| H | 3.556237928821  | 2.105070206983  | 2.750268805262  |
| H | -2.125422105045 | -0.264307991161 | 1.588509926696  |
| H | -2.055448588697 | -0.577498874292 | 4.073602279661  |
| H | -0.065503631423 | -0.339781655650 | 5.196138575692  |
| H | 3.306743486000  | 0.106289291323  | -0.574476189904 |
| H | 1.171375062629  | 0.200494214988  | -1.812275138021 |
| H | -0.984372048692 | 0.120190668647  | -0.551043577852 |

## 25-Sigma-1-a1.xyz

51

-1155.26281565

|   |                 |                 |                 |
|---|-----------------|-----------------|-----------------|
| C | -1.992707068486 | 2.076354779465  | 1.260015462068  |
| C | -0.942384967400 | 1.260040136260  | 1.671526008096  |
| C | 0.399163502676  | 1.698078565092  | 1.446923549037  |
| C | 0.646601602377  | 2.946166175402  | 0.815527711485  |
| C | -0.410176573308 | 3.734425533372  | 0.413271065158  |
| C | -1.727736429892 | 3.293517391604  | 0.635648899703  |
| C | 1.471732369009  | 0.870371831218  | 1.830137280938  |
| C | 1.294204587985  | -0.397267665643 | 2.411115536274  |
| C | 0.024383766655  | -0.852315045680 | 2.649647540735  |
| C | -1.181210627309 | -0.029580421579 | 2.404922389012  |
| C | -2.405004305499 | -0.834528283282 | 1.978291029365  |
| C | -2.456111042095 | -1.464928920849 | 0.695987053007  |
| C | -3.621768523691 | -2.221701261378 | 0.338004746176  |
| C | -4.713107500358 | -2.326658603981 | 1.260440838704  |
| C | -4.612004815205 | -1.711641956878 | 2.491284568254  |
| C | -3.465164898188 | -0.969513091692 | 2.847368654912  |
| C | -1.391722588227 | -1.378133156930 | -0.239983668194 |
| C | -2.599193759835 | -2.765352975790 | -1.808351867583 |
| C | -3.652979029341 | -2.865895126986 | -0.927655983384 |
| H | -0.133666944889 | -1.827771705211 | 3.103257425258  |
| H | -3.019602665293 | 1.760786646752  | 1.418529275071  |
| H | -2.559159839813 | 3.913877681599  | 0.312179916937  |
| H | -0.232096042484 | 4.688690839793  | -0.072463051142 |
| H | 1.673466422164  | 3.263890800491  | 0.657353878671  |
| H | 2.484421918229  | 1.226091002197  | 1.652105264395  |
| H | 2.158508592132  | -1.004548352875 | 2.657977950169  |
| H | -4.528100598799 | -3.450957511888 | -1.195437677382 |
| H | -2.644354809401 | -3.267534487138 | -2.771233477694 |
| H | -0.503737308940 | -0.801332861843 | 0.004363605482  |
| H | -3.431133377836 | -0.495567230764 | 3.825766483439  |
| H | -5.433040075391 | -1.787443546500 | 3.199479538831  |
| H | -1.406508107592 | 0.298792757750  | 3.446216729718  |
| C | -1.457139885793 | -2.010318180946 | -1.461765999605 |
| H | -0.627768554036 | -1.928373451975 | -2.159318098105 |
| C | -5.941447910280 | -3.105729135511 | 0.925243480053  |
| C | -6.948248230902 | -2.564199734268 | 0.061677668888  |
| C | -6.122704312471 | -4.359517521622 | 1.479126327015  |
| C | -6.845457830104 | -1.269917646358 | -0.517359661349 |
| C | -8.114015387745 | -3.347890964188 | -0.222770454069 |
| C | -7.275753073571 | -5.128740530150 | 1.197818752837  |
| H | -5.357956942904 | -4.765699880549 | 2.137147170495  |
| C | -7.835201940875 | -0.779332627860 | -1.340856891879 |
| H | -5.972545534447 | -0.660054367138 | -0.300832961780 |
| C | -9.115096148324 | -2.813667213595 | -1.078347211849 |
| C | -8.249360563053 | -4.635438003597 | 0.360725268050  |
| H | -7.383596786853 | -6.113251163013 | 1.646047852839  |
| C | -8.981059338021 | -1.558503766329 | -1.628192137573 |
| H | -7.737455321754 | 0.213982880057  | -1.772083672033 |
| H | -9.995707479266 | -3.416804927205 | -1.290022564857 |
| H | -9.137200949574 | -5.223457628945 | 0.137733326554  |

H -9.755094671981 -1.161498070918 -2.280186869147

## 25-Sigma-1-a2.xyz

51

-1155.26276202

|   |                 |                 |                 |
|---|-----------------|-----------------|-----------------|
| C | 0.047650779100  | -2.067615643850 | 3.235345198301  |
| C | -0.182787433757 | -0.694369783881 | 3.234800765879  |
| C | 0.530290890442  | 0.123686095843  | 4.164420917526  |
| C | 1.455726925613  | -0.462574894820 | 5.068781036330  |
| C | 1.662524420225  | -1.825237643339 | 5.053312804020  |
| C | 0.953864604114  | -2.623115172960 | 4.136280692307  |
| C | 0.286200615515  | 1.509817882393  | 4.195806580478  |
| C | -0.653908128078 | 2.143560164181  | 3.364863219922  |
| C | -1.357408854512 | 1.395967590865  | 2.457377492692  |
| C | -1.106690477255 | -0.046577436511 | 2.241793305278  |
| C | -2.346710895565 | -0.848079253878 | 1.858346504601  |
| C | -3.406824411184 | -1.049062293132 | 2.796378741102  |
| C | -4.557073749113 | -1.808195969585 | 2.395820093380  |
| C | -4.628055220675 | -2.345363174548 | 1.069341883112  |
| C | -3.576394924928 | -2.131769720866 | 0.202280046406  |
| C | -2.443880064405 | -1.385619087801 | 0.593829327069  |
| C | -3.363598519967 | -0.532752762237 | 4.118339104924  |
| C | -5.522745903430 | -1.498916760282 | 4.613856092100  |
| C | -5.597834714886 | -2.016256075741 | 3.339881212974  |
| H | -2.087216557605 | 1.868387147862  | 1.804300893227  |
| H | -0.486089731314 | -2.707856987976 | 2.539415312909  |
| H | 1.113837423198  | -3.697835026532 | 4.130615831617  |
| H | 2.365017068959  | -2.283938797433 | 5.742017366677  |
| H | 1.990643286103  | 0.176688790145  | 5.765658568187  |
| H | 0.841978939516  | 2.113142956063  | 4.910518247028  |
| H | -0.821125400485 | 3.211647454797  | 3.454220516342  |
| H | -6.465035733922 | -2.598693699433 | 3.042325811246  |
| H | -6.330642991818 | -1.671649896999 | 5.320101894865  |
| H | -2.499878786289 | 0.039346504393  | 4.446202850285  |
| H | -1.639540280762 | -1.238674348026 | -0.123436358730 |
| H | -3.619151626118 | -2.537606114034 | -0.805131355565 |
| H | -0.498859264062 | 0.001168768246  | 1.308249846513  |
| C | -4.394205894317 | -0.746194801011 | 5.006461447328  |
| H | -4.335412414357 | -0.339811407047 | 6.012710804111  |
| C | -5.798754878576 | -3.154783853659 | 0.619037626451  |
| C | -7.031045115489 | -2.530780169725 | 0.239596894130  |
| C | -5.680168932099 | -4.530111877446 | 0.540243862664  |
| C | -7.214653032210 | -1.121318881108 | 0.263129473576  |
| C | -8.120731932679 | -3.353719996867 | -0.195919322498 |
| C | -6.757220021345 | -5.338579356907 | 0.108168783986  |
| H | -4.741725710447 | -5.000090982215 | 0.825206828899  |
| C | -8.412875003960 | -0.554779851173 | -0.113512648242 |
| H | -6.392625962292 | -0.485198482324 | 0.580233555388  |
| C | -9.344118255283 | -2.737981881850 | -0.574735169714 |
| C | -7.954490116704 | -4.763029792636 | -0.248478919725 |
| H | -6.630850336164 | -6.417341440106 | 0.063460674768  |
| C | -9.490822553558 | -1.369558330886 | -0.534101337168 |
| H | -8.531994454548 | 0.525678443305  | -0.089770986598 |



|   |                  |                 |                 |
|---|------------------|-----------------|-----------------|
| H | -10.166512882006 | -3.370690808403 | -0.902418149103 |
| H | -8.788223257512  | -5.378927980470 | -0.579047704751 |
| H | -10.431850529111 | -0.911431360395 | -0.828180156503 |

## 25-Sigma-1-b1.xyz

51

-1155.26150802

|   |                 |                 |                 |
|---|-----------------|-----------------|-----------------|
| C | 0.222734101285  | 0.041384510292  | 1.260424121213  |
| C | 1.418587907943  | -0.006200294849 | 2.035031625038  |
| C | 2.682346924355  | 0.169532790608  | 1.412054909119  |
| C | 2.754312005208  | 0.385856404954  | 0.051728207199  |
| C | 1.333385388076  | -0.216641978014 | 3.426306409254  |
| C | 0.115620347251  | -0.396592883973 | 4.104358689394  |
| C | -1.054029827293 | -0.381482393063 | 3.391874966507  |
| C | -1.105443623858 | -0.179953191904 | 1.926849362987  |
| C | -2.167433496922 | 0.882174366078  | 1.599803909879  |
| C | -3.466073213359 | 0.537455116142  | 1.111509324121  |
| C | -4.404144605913 | 1.595683948145  | 0.844561723725  |
| C | -4.036825522499 | 2.957252525623  | 1.090592305619  |
| C | -2.771047172346 | 3.235276918608  | 1.566669302938  |
| C | -1.846037105757 | 2.205059405897  | 1.823524306990  |
| C | -3.878659214448 | -0.800008099265 | 0.859031633114  |
| C | -6.040246413037 | -0.044788543872 | 0.080133847238  |
| C | -5.681236328605 | 1.262090345462  | 0.318984211844  |
| H | -2.004951068627 | -0.530232894196 | 3.897644073345  |
| H | -0.578417826188 | 0.305239393319  | -0.719512856511 |
| H | 3.715115984251  | 0.521537915665  | -0.434801046167 |
| H | 3.581868832002  | 0.127880116277  | 2.019836552210  |
| H | 2.258038724787  | -0.240181670683 | 3.999492318089  |
| H | 0.112498627065  | -0.547421861704 | 5.178584404691  |
| H | -6.380376402157 | 2.064046788284  | 0.100696740176  |
| H | -7.023015609251 | -0.276084328257 | -0.322260439847 |
| H | -3.207936239455 | -1.629514983429 | 1.063945666627  |
| H | -0.858253626559 | 2.469663293499  | 2.193380891237  |
| H | -2.480596274816 | 4.265941709668  | 1.752941155378  |
| H | -1.468750871874 | -1.147226651100 | 1.533668276710  |
| C | -5.128862993275 | -1.086518371954 | 0.357845643443  |
| H | -5.412050238601 | -2.119490080284 | 0.173688471771  |
| C | -4.969455885817 | 4.086542962996  | 0.802491329496  |
| C | -6.062471799215 | 4.398565669231  | 1.674538757091  |
| C | -4.745397782394 | 4.870580973717  | -0.314508813147 |
| C | -6.333166144605 | 3.661407984016  | 2.859582282616  |
| C | -6.910429219041 | 5.508735399098  | 1.353153472926  |
| C | -5.583711935512 | 5.965494844058  | -0.627091636928 |
| H | -3.911094884893 | 4.634098037758  | -0.970791785366 |
| C | -7.390840549990 | 3.994633717165  | 3.677504737981  |
| H | -5.690286365162 | 2.825253021764  | 3.121394464924  |
| C | -7.993886088385 | 5.824223638172  | 2.216737273186  |
| C | -6.647422646515 | 6.276079196363  | 0.187625799494  |
| H | -5.381227348069 | 6.556728431181  | -1.516562374380 |
| C | -8.233021526038 | 5.084729872161  | 3.353118006761  |
| H | -7.579453020813 | 3.418239392801  | 4.579942481148  |
| H | -8.633056099636 | 6.667756577277  | 1.963993401182  |

|   |                 |                |                 |
|---|-----------------|----------------|-----------------|
| H | -7.298425738582 | 7.115701586332 | -0.046908953294 |
| H | -9.064887768066 | 5.337790571609 | 4.005690460929  |
| C | 1.569830642917  | 0.430843668596 | -0.704909639351 |
| C | 0.320031348507  | 0.260703562941 | -0.110512653762 |
| H | 1.627251643926  | 0.604153570792 | -1.776075318837 |

## 25-Sigma-1-b2.xyz

51

-1155.26152517

|   |                 |                 |                 |
|---|-----------------|-----------------|-----------------|
| C | 1.311084447334  | 0.032303698884  | 2.271983802758  |
| C | 2.626904099114  | 0.293572742784  | 1.806431237114  |
| C | 2.837956049843  | 0.602756942107  | 0.478950353297  |
| C | 1.742543165222  | 0.656865230033  | -0.401096408335 |
| C | 1.082763889324  | -0.268446672496 | 3.630060806549  |
| C | -0.193836700630 | -0.532188514551 | 4.155683014386  |
| C | -1.277214938433 | -0.515424835090 | 3.317760609668  |
| C | -1.175491087809 | -0.228643950310 | 1.869766563601  |
| C | -2.247275325916 | 0.801655352674  | 1.480806843737  |
| C | -3.460285590132 | 0.432190724625  | 0.820880238586  |
| C | -4.416059953406 | 1.462909903600  | 0.512083240853  |
| C | -4.146095096282 | 2.821701545998  | 0.872099143196  |
| C | -2.969066826838 | 3.121505200839  | 1.528159268851  |
| C | -2.028965423017 | 2.117988976637  | 1.831985870029  |
| C | -3.778151161675 | -0.904552279701 | 0.453855757608  |
| C | -5.897257373238 | -0.203875803679 | -0.478028054136 |
| C | -5.627033844647 | 1.101747980822  | -0.137220277932 |
| H | -2.270692800435 | -0.730754858302 | 3.703416275178  |
| H | -0.383834249551 | 0.456758384466  | -0.663843897139 |
| H | 1.909143233016  | 0.904047248691  | -1.445995835873 |
| H | 3.839602257366  | 0.804401190824  | 0.112512400833  |
| H | 3.455981122461  | 0.243910033589  | 2.506940712553  |
| H | 1.939249116107  | -0.295324499005 | 4.300550976232  |
| H | -0.309002403788 | -0.749163456984 | 5.212263466848  |
| H | -6.350101452005 | 1.880376639752  | -0.362098464420 |
| H | -6.831431951486 | -0.456932034724 | -0.972479729530 |
| H | -3.090249818871 | -1.714496278972 | 0.678698089883  |
| H | -1.110126617141 | 2.398745610832  | 2.341404619332  |
| H | -2.756549967068 | 4.149300369109  | 1.810702542736  |
| H | -1.440689160045 | -1.188921903560 | 1.389385744133  |
| C | -4.959593239400 | -1.216550455860 | -0.181094192673 |
| H | -5.171454617796 | -2.248389181987 | -0.448687698328 |
| C | -5.123309085911 | 3.914064978812  | 0.588393378652  |
| C | -5.246954533899 | 4.480681201702  | -0.721465970148 |
| C | -5.899838633764 | 4.409083620955  | 1.619849770245  |
| C | -4.460206729266 | 4.044557650993  | -1.822271914223 |
| C | -6.189608739795 | 5.539494057791  | -0.933231862845 |
| C | -6.827951758867 | 5.454735551645  | 1.406902568917  |
| H | -5.799950296604 | 3.979051202706  | 2.613753064451  |
| C | -4.602832420007 | 4.616185361234  | -3.067847241714 |
| H | -3.734041080310 | 3.250202571502  | -1.672110175370 |
| C | -6.313389930102 | 6.105949059696  | -2.230568188085 |
| C | -6.972805144890 | 6.006490177166  | 0.155325904829  |
| H | -7.425679885036 | 5.816207774208  | 2.239827670409  |

|   |                 |                |                 |
|---|-----------------|----------------|-----------------|
| C | -5.540368622888 | 5.655500891532 | -3.277038079572 |
| H | -3.990634575380 | 4.268501161909 | -3.896381023090 |
| H | -7.032345776052 | 6.908458192702 | -2.382399931511 |
| H | -7.685838808603 | 6.810062510814 | -0.016633582927 |
| H | -5.644968045927 | 6.098260774031 | -4.264419414498 |
| C | 0.206293225666  | 0.088345688659 | 1.372608604262  |
| C | 0.443663061458  | 0.403094520899 | 0.037869402621  |

## 25-Sigma-1'-a1.xyz

51

-1155.26769825

|   |                 |                 |                 |
|---|-----------------|-----------------|-----------------|
| C | -0.015746724495 | -0.705206720456 | -0.180037981497 |
| C | 0.043648505340  | -0.153449790737 | 1.098859795623  |
| C | 1.317596083602  | 0.112103529816  | 1.684321343676  |
| C | 2.488882404723  | -0.123289585410 | 0.917367798746  |
| C | 2.405398468601  | -0.664052046800 | -0.350579508058 |
| C | 1.149279706347  | -0.972269309500 | -0.892971593989 |
| C | 1.396357630251  | 0.645046440344  | 3.015139981239  |
| C | 0.206104076128  | 1.011810247285  | 3.707742388704  |
| C | -1.022398691048 | 0.764139972011  | 3.178033576685  |
| C | -1.225680353982 | 0.234884533808  | 1.810387681235  |
| C | -2.386668705890 | -0.753383327577 | 1.705920873490  |
| C | -2.318460696351 | -2.044657287205 | 2.319798980669  |
| C | -3.446550626974 | -2.922124870343 | 2.199338403921  |
| C | -4.594595288061 | -2.494752987799 | 1.480946103335  |
| C | -4.633251687867 | -1.249127239171 | 0.901998363073  |
| C | -3.523954021986 | -0.379918938345 | 1.018564292503  |
| C | -1.186884825872 | -2.504379866378 | 3.044585140425  |
| C | -2.282918450460 | -4.615995742770 | 3.505122789925  |
| C | -3.395790874174 | -4.205006318311 | 2.806686722230  |
| H | -1.914915486722 | 0.980759215472  | 3.760139623582  |
| H | -0.983672899675 | -0.921572385700 | -0.623365263384 |
| H | 1.080881308647  | -1.402883593721 | -1.888235728511 |
| H | 3.307580816820  | -0.835384554799 | -0.929831216744 |
| H | 3.456125691987  | 0.153086302798  | 1.322361609053  |
| H | 0.289094937806  | 1.401827073132  | 4.716802926422  |
| H | -4.258381755727 | -4.860790272426 | 2.709769938253  |
| H | -2.257200993631 | -5.600397127193 | 3.965182377576  |
| H | -0.314852256634 | -1.865875488642 | 3.147843123575  |
| H | -3.574600100967 | 0.602173810016  | 0.553236041376  |
| H | -5.511584063021 | -0.922692071701 | 0.351757703438  |
| H | -5.443087343563 | -3.170158402870 | 1.397153803054  |
| H | -1.573313479888 | 1.136799288135  | 1.263174435135  |
| C | 2.662899511014  | 0.730060829245  | 3.737296101333  |
| C | 3.054086392514  | 1.907791493625  | 4.468278134562  |
| C | 3.438023936015  | -0.427891303052 | 3.825511723822  |
| C | 2.401236162418  | 3.158509230232  | 4.335370870462  |
| C | 4.207539892973  | 1.830943074087  | 5.312734978639  |
| C | 4.560289653373  | -0.491100368090 | 4.669159425677  |
| H | 3.125759231626  | -1.322758311113 | 3.295572675390  |
| C | 2.831749932182  | 4.261368747816  | 5.045598276152  |
| H | 1.564216429984  | 3.264836525048  | 3.651491836909  |
| C | 4.625145985889  | 2.981536498747  | 6.029993266427  |

|   |                 |                 |                |
|---|-----------------|-----------------|----------------|
| C | 4.931954940679  | 0.613849472650  | 5.403624582436 |
| H | 5.118098835402  | -1.419497698387 | 4.746803858450 |
| C | 3.945944368706  | 4.173750607778  | 5.907770573813 |
| H | 2.313016365692  | 5.209249842012  | 4.929812850307 |
| H | 5.501819177126  | 2.908047025260  | 6.669079212960 |
| H | 5.796638718520  | 0.568425701342  | 6.061542011081 |
| H | 4.274255934746  | 5.050419994348  | 6.459325492325 |
| C | -1.168046575409 | -3.754621277514 | 3.623514593341 |
| H | -0.289069196715 | -4.081182568998 | 4.173305011156 |

## 25-Sigma-1'-a2.xyz

51

-1155.26808527

|   |                 |                 |                 |
|---|-----------------|-----------------|-----------------|
| C | -0.219081999950 | -0.166436225381 | 0.191912907012  |
| C | -0.020657445990 | -0.146247693731 | 1.571532990033  |
| C | 1.310647232754  | -0.153063219021 | 2.082021097700  |
| C | 2.397235712201  | -0.252589744222 | 1.174001470971  |
| C | 2.175680400703  | -0.286264374375 | -0.189195848837 |
| C | 0.863946906918  | -0.228117812908 | -0.680583421162 |
| C | 1.533658673335  | -0.139074070211 | 3.501659399604  |
| C | 0.433783107068  | -0.314047430945 | 4.391934054961  |
| C | -0.846648527490 | -0.288937263911 | 3.934790855821  |
| C | -1.194386064432 | -0.060202006820 | 2.511037809142  |
| C | -2.456160800697 | -0.793465095798 | 2.063805815119  |
| C | -2.493816217121 | -2.222332246668 | 1.992662458491  |
| C | -3.710170322334 | -2.856935484262 | 1.575246361283  |
| C | -4.839527888509 | -2.061204330609 | 1.245783634818  |
| C | -4.775768319760 | -0.690676358536 | 1.324250872026  |
| C | -3.578494149860 | -0.060421275484 | 1.735369193478  |
| C | -1.382858246676 | -3.047141940642 | 2.313747711259  |
| C | -2.667647766974 | -5.042920700713 | 1.824331278975  |
| C | -3.763625843215 | -4.274276531644 | 1.502539827188  |
| H | -1.672865146140 | -0.332244969235 | 4.640311957799  |
| H | -1.230781900791 | -0.147947622170 | -0.202550089472 |
| H | 0.686356870891  | -0.255062513284 | -1.752241278686 |
| H | 3.013152236081  | -0.372242602772 | -0.874793022571 |
| H | 3.408107416711  | -0.334511534917 | 1.557795435979  |
| H | 0.624381603061  | -0.364341096784 | 5.458593078968  |
| H | -4.692214268000 | -4.744307244779 | 1.186024933589  |
| H | -2.721701866161 | -6.126825629329 | 1.764153851216  |
| H | -0.445647948955 | -2.595006697950 | 2.626484826162  |
| H | -3.547804630754 | 1.025626214015  | 1.789723826338  |
| H | -5.639806109726 | -0.082172456641 | 1.071297819569  |
| H | -5.755935083338 | -2.555142264533 | 0.930588768756  |
| H | -1.477256709418 | 1.013860206385  | 2.518702206633  |
| C | 2.851005459298  | 0.133207297186  | 4.063798071544  |
| C | 3.410578441011  | -0.624029808301 | 5.154629827808  |
| C | 3.514599849481  | 1.272880792726  | 3.601950584591  |
| C | 2.885338222767  | -1.864634211711 | 5.593026783753  |
| C | 4.606226153460  | -0.137151212992 | 5.774207590090  |
| C | 4.681505869580  | 1.742473073262  | 4.227012579714  |
| H | 3.077772488295  | 1.853696536008  | 2.795307520629  |
| C | 3.475668943825  | -2.556515403791 | 6.632281618597  |

|   |                 |                 |                |
|---|-----------------|-----------------|----------------|
| H | 2.022180204721  | -2.296029073841 | 5.094880638752 |
| C | 5.187969630446  | -0.869587383901 | 6.840652586967 |
| C | 5.210495061390  | 1.055714122235  | 5.298176601116 |
| H | 5.149170277358  | 2.654910106287  | 3.869487973650 |
| C | 4.629248743319  | -2.053094504831 | 7.270649328419 |
| H | 3.052183938669  | -3.504482344418 | 6.953271749220 |
| H | 6.093415552177  | -0.485570533000 | 7.304434516549 |
| H | 6.109934677438  | 1.417571812979  | 5.790731952940 |
| H | 5.082726080039  | -2.608595820362 | 8.086968416342 |
| C | -1.465968290193 | -4.420294066311 | 2.234017480725 |
| H | -0.601144206514 | -5.028797359355 | 2.485573396429 |

## 25-Sigma-1'-b1.xyz

51

-1155.26704849

|   |                 |                 |                 |
|---|-----------------|-----------------|-----------------|
| C | 0.213174862125  | 0.097127346281  | 1.246740935555  |
| C | 1.398101912462  | 0.185469199182  | 2.030665435946  |
| C | 2.646886922386  | 0.353644104701  | 1.376934380078  |
| C | 2.724926653312  | 0.363897888668  | -0.002493091348 |
| C | 1.557039558037  | 0.218449941373  | -0.764259986400 |
| C | 1.308172263766  | 0.173006382122  | 3.465622943393  |
| C | 0.032098169177  | 0.217889954032  | 4.098784598146  |
| C | -1.112824118896 | 0.095243130873  | 3.375413953915  |
| C | -1.137385083534 | -0.023633722778 | 1.899123207386  |
| C | -2.194929010017 | 0.933632158274  | 1.330341277786  |
| C | -3.464552647912 | 0.469488351939  | 0.861094006352  |
| C | -4.400377243027 | 1.441701066007  | 0.365616291206  |
| C | -4.055013573028 | 2.817699037040  | 0.365535951974  |
| C | -2.831126065392 | 3.232910491670  | 0.835431190635  |
| C | -1.905156508590 | 2.284980293626  | 1.319905412996  |
| C | -3.860946435052 | -0.896940057378 | 0.849000017981  |
| C | -6.008365065505 | -0.321738643995 | -0.119771778512 |
| C | -5.663724707364 | 1.010185529340  | -0.119961469209 |
| H | -2.069551551278 | 0.033295358786  | 3.888254103162  |
| H | -0.583157128528 | 0.020198846710  | -0.747142651930 |
| H | 1.614227442090  | 0.223673198729  | -1.849344124032 |
| H | 3.684341675454  | 0.499178807163  | -0.492531986290 |
| H | 3.543983301639  | 0.504124089217  | 1.967113239501  |
| H | -0.014157680127 | 0.240413101918  | 5.182372883086  |
| H | -6.358224851617 | 1.758764311344  | -0.495179878707 |
| H | -6.978538410673 | -0.638228328229 | -0.493797986041 |
| H | -3.194202372671 | -1.667402822519 | 1.225248670300  |
| H | -0.939418389866 | 2.630498623187  | 1.682619948413  |
| H | -2.568026712732 | 4.287235232124  | 0.836946793170  |
| H | -4.776155737047 | 3.539138600643  | -0.012137635197 |
| H | -1.477029990758 | -1.055170356372 | 1.705222411642  |
| C | -5.094500572780 | -1.282041327650 | 0.371071585808  |
| H | -5.366693056108 | -2.334377646762 | 0.373852737413  |
| C | 2.491103424804  | 0.018252243449  | 4.304709729049  |
| C | 2.725212917483  | 0.822113334757  | 5.477303517719  |
| C | 3.341577226068  | -1.052733327616 | 4.020049840580  |
| C | 1.998458993137  | 2.002602452060  | 5.770046641579  |
| C | 3.799363379807  | 0.453216037016  | 6.349032253680  |

|   |                |                 |                 |
|---|----------------|-----------------|-----------------|
| C | 4.382794742924 | -1.409843815893 | 4.892946104326  |
| H | 3.146831487365 | -1.672572645807 | 3.150050664852  |
| C | 2.280675173497 | 2.746968639707  | 6.898444024867  |
| H | 1.223190502850 | 2.345796265787  | 5.091393037698  |
| C | 4.064347630196 | 1.237676810327  | 7.500860163781  |
| C | 4.601503780267 | -0.675794186469 | 6.038449246838  |
| H | 4.999091499450 | -2.274033271815 | 4.663910349133  |
| C | 3.314006497760 | 2.359273388902  | 7.778122084540  |
| H | 1.707139679739 | 3.646931885590  | 7.103810599406  |
| H | 4.881743847009 | 0.944534447165  | 8.155266174571  |
| H | 5.403110905342 | -0.950395113223 | 6.720081094602  |
| H | 3.525313714773 | 2.955516272292  | 8.661529680571  |
| C | 0.316638749583 | 0.099178444505  | -0.143296595968 |

## 25-Sigma-1'-b2.xyz

51

-1155.26514125

|   |                 |                 |                 |
|---|-----------------|-----------------|-----------------|
| C | 0.305215461425  | 0.198291161513  | 0.058312136844  |
| C | 0.136253635159  | -0.021242536836 | 1.425516696548  |
| C | 1.285546466863  | -0.125855508989 | 2.258874704517  |
| C | 2.571038647461  | 0.068028941941  | 1.690238379615  |
| C | 2.714585338113  | 0.303019995930  | 0.338008775029  |
| C | 1.577301049152  | 0.350831637612  | -0.483459173172 |
| C | 1.124690433171  | -0.342382105415 | 3.670722356973  |
| C | -0.173247495751 | -0.296928354628 | 4.252188366790  |
| C | -1.289580448108 | -0.243056285991 | 3.474650948318  |
| C | -1.246929651678 | -0.168751265821 | 1.997715069135  |
| C | -2.246627705508 | 0.888381457632  | 1.509395434916  |
| C | -3.478005614115 | 0.535303513371  | 0.872608544733  |
| C | -4.359471202064 | 1.596634607363  | 0.468705523247  |
| C | -4.000308665947 | 2.946201888603  | 0.717955161605  |
| C | -2.813333384721 | 3.252069446098  | 1.341323264647  |
| C | -1.940326231576 | 2.216903428862  | 1.737251741885  |
| C | -3.885670114853 | -0.801412993664 | 0.606513939057  |
| C | -5.940880955607 | -0.026881971118 | -0.421898107453 |
| C | -5.583636338514 | 1.279166129221  | -0.178178196984 |
| H | -2.272335557435 | -0.303634012218 | 3.935651516595  |
| H | -0.567649842081 | 0.268256457409  | -0.584590129100 |
| H | 1.687410640625  | 0.529851260428  | -1.549504557413 |
| H | 3.701758147072  | 0.457653382193  | -0.086775930131 |
| H | 3.446391676154  | 0.047894265088  | 2.329897575874  |
| H | -0.267920033469 | -0.408955684503 | 5.327516375089  |
| H | -6.237115444576 | 2.094908196803  | -0.479810976133 |
| H | -6.880692453448 | -0.256029988154 | -0.917370721700 |
| H | -3.259446228399 | -1.638421970352 | 0.901661964147  |
| H | -1.001709197891 | 2.476275731381  | 2.222251872565  |
| H | -2.539142684386 | 4.286011882221  | 1.532433862704  |
| H | -4.681304497318 | 3.735315584267  | 0.407141244037  |
| H | -1.606923800775 | -1.157389723607 | 1.662498720934  |
| C | -5.079773403365 | -1.075069564676 | -0.023956956525 |
| H | -5.361982198750 | -2.107259728277 | -0.214648922140 |
| C | 2.252335553402  | -0.581733407692 | 4.573130522518  |
| C | 3.233719938411  | -1.616176974133 | 4.365849568923  |

|   |                |                 |                |
|---|----------------|-----------------|----------------|
| C | 2.350107801104 | 0.251178630549  | 5.687110709386 |
| C | 3.120368801672 | -2.614480664858 | 3.364634291400 |
| C | 4.337607869749 | -1.691735143846 | 5.275541795882 |
| C | 3.452480669992 | 0.180616178678  | 6.555672061207 |
| H | 1.597168797709 | 1.017207149375  | 5.851597493031 |
| C | 4.074950264710 | -3.601425710475 | 3.236727917450 |
| H | 2.266722244955 | -2.615639762731 | 2.694029383872 |
| C | 5.309638541242 | -2.713766775029 | 5.110355585882 |
| C | 4.431950697108 | -0.766281122079 | 6.346380248653 |
| H | 3.525826232528 | 0.877884838947  | 7.384891081108 |
| C | 5.187108662110 | -3.647754890220 | 4.106902403332 |
| H | 3.965663644162 | -4.355331211992 | 2.461583137381 |
| H | 6.146366594781 | -2.753771516356 | 5.803749388605 |
| H | 5.285687358645 | -0.828271250902 | 7.017058031963 |
| H | 5.933117982860 | -4.429245640925 | 3.990945874350 |

## 25-Sigma-2'.xyz

51

-1155.26710758

|   |                 |                 |                 |
|---|-----------------|-----------------|-----------------|
| C | 0.211009292892  | 0.199728171965  | -0.001498852880 |
| C | 0.038387384014  | -0.363312481504 | 1.303430637350  |
| C | 1.102936237320  | -0.980578690177 | 1.932683391776  |
| C | 2.373320494290  | -1.057305012580 | 1.316449852754  |
| C | 2.569515316316  | -0.512460970716 | 0.068915283778  |
| C | 1.501907451870  | 0.123025541601  | -0.619077401600 |
| C | 1.682812638232  | 0.679934667292  | -1.913506603594 |
| C | 0.638093360167  | 1.283566758062  | -2.576955710309 |
| C | -0.639502623509 | 1.350772201863  | -1.972680021348 |
| C | -0.847768963762 | 0.821224399186  | -0.717679024425 |
| H | -1.837245503644 | 0.871908141191  | -0.271119942213 |
| H | -1.462824042198 | 1.821257083582  | -2.504308287067 |
| H | 0.790005790921  | 1.705381187904  | -3.567255513971 |
| H | 2.666295659421  | 0.618981217445  | -2.374790073324 |
| H | 3.545326243583  | -0.564003626668 | -0.409254628317 |
| H | 3.191424220694  | -1.546697169303 | 1.838333173412  |
| H | 0.962470806197  | -1.407015023454 | 2.923014952969  |
| C | -1.282683393580 | -0.316405678752 | 1.996495096155  |
| C | -2.062230588532 | -1.422455817400 | 2.057201390864  |
| C | -3.337186932130 | -1.455278692135 | 2.795503084488  |
| C | -3.835083997077 | -0.184309988060 | 3.368221065508  |
| C | -3.037683499027 | 0.966632471942  | 3.282365474081  |
| C | -1.744786334369 | 0.904854275829  | 2.632832631945  |
| C | -0.955960083578 | 2.065206864785  | 2.621771808610  |
| C | -1.417847057119 | 3.249642416029  | 3.176449064371  |
| C | -2.702469985858 | 3.337146715300  | 3.750378420419  |
| C | -3.498890676768 | 2.218901356666  | 3.797133992758  |
| H | -4.497397454467 | 2.279164067620  | 4.215280488549  |
| H | -3.060359849827 | 4.283573424236  | 4.143177488600  |
| H | -0.783737636435 | 4.131606256967  | 3.148140548415  |
| H | 0.027478933049  | 2.035438121859  | 2.164489960530  |
| C | -5.090288274272 | -0.228859028550 | 4.126518891703  |
| C | -5.029289999757 | 0.050850407867  | 5.488246083208  |
| C | -6.142778679744 | -0.159720138573 | 6.324570927142  |

|   |                 |                 |                |
|---|-----------------|-----------------|----------------|
| C | -7.325054977256 | -0.623482950688 | 5.793738870423 |
| C | -7.453245632141 | -0.869381895206 | 4.401391998731 |
| C | -6.328290874569 | -0.665911553629 | 3.539378152316 |
| C | -6.513195024668 | -0.825733047718 | 2.141279840248 |
| C | -7.729168929325 | -1.225581615424 | 1.628942600567 |
| C | -8.825289756945 | -1.473048670677 | 2.485830966994 |
| C | -8.689682508376 | -1.288322865502 | 3.843370203610 |
| H | -9.534575208339 | -1.446524121181 | 4.509532855226 |
| H | -9.777125114866 | -1.790427823666 | 2.068584535536 |
| H | -7.847558194564 | -1.340193033648 | 0.554750435049 |
| H | -5.700444671757 | -0.602079867651 | 1.455839708053 |
| H | -8.185037091537 | -0.796100624552 | 6.436571762241 |
| H | -6.052842044398 | 0.033175088914  | 7.389561561244 |
| H | -4.088185809696 | 0.369518266361  | 5.927696937466 |
| H | -3.202374326526 | -2.128617763869 | 3.666782012869 |
| H | -4.119169544230 | -1.984570415000 | 2.233661704042 |
| H | -1.745262146090 | -2.345318712283 | 1.579081998991 |

## 25-Sigma-2.xyz

51

-1155.26762775

|   |                 |                 |                 |
|---|-----------------|-----------------|-----------------|
| C | 0.361994876870  | -0.096111182075 | -0.258986097407 |
| C | 0.014612797810  | -0.316600490057 | 1.113030069835  |
| C | 0.966264619840  | -0.806426319173 | 1.989597124806  |
| C | 2.286675724969  | -1.076021533491 | 1.565109491593  |
| C | 2.649297128773  | -0.858816796144 | 0.255807704903  |
| C | 1.703544210518  | -0.371565907249 | -0.683733037902 |
| C | 2.056835439717  | -0.156457475616 | -2.043225237837 |
| C | 1.129761787452  | 0.300172151886  | -2.952591116315 |
| C | -0.198579763303 | 0.558344946274  | -2.538734984517 |
| C | -0.572310381593 | 0.364637691303  | -1.226770475489 |
| H | -1.596828245732 | 0.562498711962  | -0.924187932216 |
| H | -0.929713791056 | 0.909455229762  | -3.262734387584 |
| H | 1.413236451715  | 0.458817699788  | -3.990025592865 |
| H | 3.078293008254  | -0.364459382046 | -2.355080039115 |
| H | 3.664823372362  | -1.061181252477 | -0.077798523948 |
| H | 3.012164592019  | -1.451140551087 | 2.282286432358  |
| H | 0.696800099826  | -0.973561725720 | 3.029888605258  |
| C | -1.346245947482 | 0.008184572066  | 1.627230207609  |
| C | -1.718842232073 | 1.332246420651  | 1.776390226523  |
| C | -2.961559751993 | 1.683797104980  | 2.328635103775  |
| C | -3.851783319413 | 0.710495120353  | 2.767219219643  |
| C | -3.538881143850 | -0.677100332674 | 2.562354973697  |
| C | -2.270813002301 | -1.024573962663 | 1.990460701575  |
| C | -1.981381826376 | -2.395502892473 | 1.756519290739  |
| C | -2.896938469776 | -3.379687447836 | 2.055096453802  |
| C | -4.158705019484 | -3.033456983116 | 2.583746235130  |
| C | -4.473517405873 | -1.713272248288 | 2.821476637028  |
| H | -5.468715079475 | -1.466212414251 | 3.180209317518  |
| H | -4.892432864914 | -3.808296386548 | 2.789096786693  |
| H | -2.657240628228 | -4.422007614066 | 1.862785214348  |
| H | -1.024490428904 | -2.660401950014 | 1.317490263667  |
| C | -5.020427185139 | 1.151352274514  | 3.535184940371  |



|   |                 |                 |                |
|---|-----------------|-----------------|----------------|
| C | -5.110697336723 | 0.716650276455  | 4.951740439799 |
| C | -6.270316817260 | 1.176452286235  | 5.741067854807 |
| C | -7.151055477695 | 2.065533097971  | 5.235658608654 |
| C | -7.026272240582 | 2.535441541545  | 3.882653522358 |
| C | -5.965581658928 | 2.055330915666  | 3.024536734340 |
| C | -5.941380094451 | 2.471531924632  | 1.656594015167 |
| C | -6.870354089653 | 3.363672824364  | 1.177955248509 |
| C | -7.871733933252 | 3.863003155500  | 2.038823731641 |
| C | -7.954168726241 | 3.448792697459  | 3.358932604791 |
| H | -8.748104874723 | 3.823089581729  | 3.998829434099 |
| H | -8.603825557656 | 4.567486966589  | 1.653442045289 |
| H | -6.846522452935 | 3.673953721859  | 0.138060747067 |
| H | -5.189717540657 | 2.060094236768  | 0.992204476569 |
| H | -7.983341006663 | 2.429998404343  | 5.831186826643 |
| H | -6.366008956065 | 0.801922115558  | 6.756040831710 |
| H | -4.938667493840 | -0.362826306386 | 5.059830634598 |
| H | -4.199660281655 | 1.130944205172  | 5.430855909320 |
| H | -3.187993074805 | 2.734061549466  | 2.489759950641 |
| H | -1.026100188188 | 2.120877748902  | 1.495825230111 |

## 25-Sigma-3.xyz

51

-1155.26542833

|   |                 |                 |                 |
|---|-----------------|-----------------|-----------------|
| C | 0.176924582104  | 0.026548373400  | -0.006766842381 |
| C | 0.133005392876  | -0.191132136288 | 1.408725862499  |
| C | 1.289072301885  | -0.549772084445 | 2.077083278095  |
| C | 2.513960076612  | -0.721317814997 | 1.391083451679  |
| C | 2.577852014903  | -0.528608388927 | 0.030640752833  |
| C | 1.419864272126  | -0.149304957364 | -0.698582196158 |
| C | 1.467459827344  | 0.069264491207  | -2.102007023457 |
| C | 0.342350969950  | 0.450129797612  | -2.798301869053 |
| C | -0.883782866473 | 0.632833744622  | -2.115670820584 |
| C | -0.963340619292 | 0.426440905470  | -0.755592141733 |
| H | -1.909156952391 | 0.573853873698  | -0.241383581768 |
| H | -1.767798919143 | 0.939828839939  | -2.669292948433 |
| H | 0.393059965939  | 0.614946532258  | -3.871716135365 |
| H | 2.414942971864  | -0.068036177418 | -2.619239006245 |
| H | 3.516299815772  | -0.660557999733 | -0.503788597075 |
| H | 3.402470449107  | -1.008147917695 | 1.947919746975  |
| H | 1.253217548336  | -0.710419395573 | 3.152125148302  |
| C | -1.130517724650 | -0.002515617657 | 2.181111549870  |
| C | -1.296812674545 | 1.138461887577  | 2.940498137912  |
| C | -2.473661412545 | 1.357838835418  | 3.688553774749  |
| C | -3.499597183751 | 0.435436672268  | 3.687578612203  |
| C | -3.361260368328 | -0.774425105243 | 2.936952973875  |
| C | -2.164436414938 | -0.993993477567 | 2.177141072551  |
| C | -2.031991200923 | -2.210589643576 | 1.454862396903  |
| C | -3.026719301664 | -3.162959880147 | 1.471410508046  |
| C | -4.206029602536 | -2.945075759581 | 2.218858119973  |
| C | -4.365740325275 | -1.779883220028 | 2.935451958492  |
| H | -5.269233867972 | -1.629181830482 | 3.520082601774  |
| H | -4.985697536428 | -3.702375898943 | 2.233463785482  |
| H | -2.903218856937 | -4.087487870712 | 0.913130424632  |

|   |                 |                 |                |
|---|-----------------|-----------------|----------------|
| H | -1.122972529522 | -2.386505205223 | 0.886595881754 |
| C | -4.726555709608 | 0.712084629784  | 4.491077037572 |
| C | -4.710522345579 | 0.559985444670  | 5.841813893368 |
| C | -5.882265348936 | 0.854348895849  | 6.686547047746 |
| C | -7.080809593133 | 1.319601281864  | 5.999003499701 |
| C | -7.117057387287 | 1.485205672347  | 4.630710467370 |
| C | -5.934078550422 | 1.191602627312  | 3.845676705406 |
| C | -6.004919339077 | 1.399578818328  | 2.460486345794 |
| C | -7.175451557435 | 1.860097664822  | 1.874073351604 |
| C | -8.336153322616 | 2.139255136632  | 2.632829890263 |
| C | -8.308405034370 | 1.956970439400  | 3.991154045514 |
| H | -9.180224508309 | 2.167125555878  | 4.604363436791 |
| H | -9.233288078518 | 2.497023231642  | 2.138099632783 |
| H | -7.200065250670 | 2.011705419926  | 0.798242754661 |
| H | -5.136141620894 | 1.201452709792  | 1.841762838733 |
| H | -7.961356960641 | 1.542625215947  | 6.597305564676 |
| H | -5.623530465461 | 1.586127097330  | 7.476473381927 |
| H | -6.150165290849 | -0.027209305243 | 7.301022692328 |
| H | -3.812244145099 | 0.206333899164  | 6.340176737744 |
| H | -2.574810626365 | 2.274919924768  | 4.263765280996 |
| H | -0.512849360081 | 1.891436397168  | 2.954797375195 |

## 25-Sigma-4.xyz

51

-1155.27653235

|   |                 |                 |                 |
|---|-----------------|-----------------|-----------------|
| C | 0.173636879844  | 0.123664814701  | -0.194279180399 |
| C | -0.117205290142 | -0.209669868466 | 1.169755448269  |
| C | 0.906648356680  | -0.623702606520 | 2.005389803723  |
| C | 2.241589256741  | -0.699085636849 | 1.551742388878  |
| C | 2.549251689060  | -0.365533326016 | 0.252924500120  |
| C | 1.531967669273  | 0.045553153763  | -0.647485512074 |
| C | 1.833416594821  | 0.374140687170  | -1.996579169955 |
| C | 0.841163099932  | 0.752420792262  | -2.872393635150 |
| C | -0.502566738944 | 0.809201828258  | -2.433767141245 |
| C | -0.827616677580 | 0.501582900672  | -1.130412746437 |
| H | -1.865792710354 | 0.541459444205  | -0.813783786450 |
| H | -1.285621976738 | 1.093906569505  | -3.132139707575 |
| H | 1.085017639443  | 1.000574992707  | -3.902273309454 |
| H | 2.868273710237  | 0.316064335584  | -2.327379717545 |
| H | 3.576134237068  | -0.416060228021 | -0.102554485163 |
| H | 3.022070363535  | -1.014732681855 | 2.239067333519  |
| H | 0.682265439753  | -0.872693246132 | 3.039788402856  |
| C | -1.487362045221 | -0.061114004319 | 1.728832706363  |
| C | -2.051199877841 | 1.203277489620  | 1.808095751646  |
| C | -3.299833567947 | 1.409011355956  | 2.406787287214  |
| C | -4.012713476864 | 0.352801166235  | 2.975318351836  |
| C | -3.497296141238 | -0.985960670101 | 2.853998861496  |
| C | -2.226091028162 | -1.187868756085 | 2.221263893303  |
| C | -1.751670650417 | -2.515149105348 | 2.052233735676  |
| C | -2.486951632901 | -3.597531126944 | 2.484498667002  |
| C | -3.744574241868 | -3.398425447330 | 3.088382929613  |
| C | -4.242382863214 | -2.122504702079 | 3.255254998215  |
| H | -5.235212797517 | -1.995004626951 | 3.675899184580  |

|   |                 |                 |                |
|---|-----------------|-----------------|----------------|
| H | -4.335702123013 | -4.253050518652 | 3.406280023961 |
| H | -2.107378581695 | -4.605326688327 | 2.339701272831 |
| H | -0.800569329570 | -2.672470861748 | 1.553690956996 |
| C | -5.176700477546 | 0.683264858130  | 3.788237088259 |
| C | -5.235825361566 | 0.179141217664  | 5.121839084136 |
| C | -6.159291759633 | 0.643664571205  | 6.006273545204 |
| C | -7.177056383755 | 1.639194958488  | 5.639769068494 |
| C | -7.195090325390 | 2.049855287312  | 4.206378705194 |
| C | -6.205273884452 | 1.564237624517  | 3.304283031867 |
| C | -6.296792588928 | 1.909747930618  | 1.930805499483 |
| C | -7.295025723621 | 2.752837171217  | 1.482639777738 |
| C | -8.235641420913 | 3.264229828721  | 2.389649541437 |
| C | -8.190144763864 | 2.905786581447  | 3.733026076830 |
| H | -8.940415706417 | 3.285783773939  | 4.421736661338 |
| H | -9.020968354015 | 3.927481769546  | 2.037473004247 |
| H | -7.360785698363 | 3.005306226435  | 0.428606157624 |
| H | -5.595121513291 | 1.482512194457  | 1.222832374277 |
| H | -8.170133660279 | 1.265570057660  | 5.940545128486 |
| H | -7.040578210286 | 2.520921573996  | 6.291346581190 |
| H | -6.130950282603 | 0.310938423511  | 7.040743489812 |
| H | -4.465057212339 | -0.508206222693 | 5.453970950737 |
| H | -3.668401132757 | 2.424874287233  | 2.512230224911 |
| H | -1.497073185765 | 2.061790047397  | 1.439532609827 |

## 25-Sigma-5'.xyz

51

-1155.27183090

|   |                 |                 |                 |
|---|-----------------|-----------------|-----------------|
| C | -0.078087214749 | -0.157064693458 | 0.085945032714  |
| C | -0.059393088946 | -0.065348277826 | 1.573836674399  |
| C | 1.198522101734  | -0.059368535138 | 2.254540340587  |
| C | 2.378014245688  | -0.028772368029 | 1.483669851232  |
| C | 2.399260750381  | -0.081864686350 | 0.077299530124  |
| C | 1.216230052911  | -0.153639954698 | -0.603928204875 |
| C | -1.248674435755 | 0.040040699584  | 2.304291501076  |
| C | -1.160574828383 | 0.163531070251  | 3.696282609421  |
| C | 0.061927959067  | 0.141230985588  | 4.375574327261  |
| C | 1.258796411867  | -0.000319676323 | 3.686637373999  |
| C | -2.582505054235 | 0.061091668932  | 1.635779127371  |
| C | -3.181077481945 | -1.145027410865 | 1.148192244985  |
| C | -4.452677054233 | -1.067122165022 | 0.491993773790  |
| C | -5.092597648950 | 0.193049920109  | 0.355900122651  |
| C | -4.506294991473 | 1.333929384021  | 0.852210113011  |
| C | -3.247947718066 | 1.264674880545  | 1.493223222046  |
| C | -2.573260567431 | -2.421340605693 | 1.297555784784  |
| C | -3.180221203878 | -3.557880425320 | 0.808610037938  |
| C | -4.428746861155 | -3.477172900690 | 0.148409332746  |
| C | -5.050357358692 | -2.257782711029 | -0.001381928078 |
| C | 2.537094051246  | -0.159881232942 | 4.419778451635  |
| C | 3.022950308866  | 0.847091382205  | 5.318721862270  |
| C | 4.216967435201  | 0.579499280097  | 6.065639780335  |
| C | 4.892300666053  | -0.657518125555 | 5.892247166225  |
| C | 4.419314925398  | -1.597692934582 | 5.006772549993  |
| C | 3.242230247588  | -1.345025300822 | 4.270080507194  |

|   |                 |                 |                 |
|---|-----------------|-----------------|-----------------|
| C | 4.711857952030  | 1.566048283019  | 6.959134778996  |
| C | 4.069688965240  | 2.775161373457  | 7.105092750567  |
| C | 2.906448237818  | 3.051284360142  | 6.350362909133  |
| C | 2.398139387412  | 2.113195244542  | 5.477522929020  |
| H | 1.512498396847  | 2.350328787953  | 4.895375930641  |
| H | 2.412096100471  | 4.013755826909  | 6.454775547718  |
| H | 4.459363778574  | 3.522430032377  | 7.791486864992  |
| H | 5.615865650863  | 1.350289092367  | 7.524453988953  |
| H | 5.793851156272  | -0.848112755488 | 6.470141859261  |
| H | 4.938347858051  | -2.543228931768 | 4.875760235366  |
| H | 2.860995816656  | -2.113095093802 | 3.601427814629  |
| H | 1.204499874801  | -0.207856008418 | -1.689455074687 |
| H | 3.349689762913  | -0.058281238227 | -0.445056513646 |
| H | 3.327088980854  | 0.057044136114  | 2.005897891827  |
| H | -6.014896032498 | -2.188411809769 | -0.499875041993 |
| H | -4.897244706808 | -4.380594950031 | -0.233509790396 |
| H | -2.698813471456 | -4.524342080552 | 0.934921874624  |
| H | -6.057513424529 | 0.240625676092  | -0.144152207122 |
| H | -5.001475149460 | 2.296019437014  | 0.750955074570  |
| H | -2.790354902977 | 2.176243772674  | 1.870522734552  |
| H | -2.079205724549 | 0.251785521238  | 4.270756505729  |
| H | 0.067603002443  | 0.193184042547  | 5.460259469272  |
| H | -1.621768586065 | -2.502692153243 | 1.817126084699  |
| H | -0.620948112930 | -1.066971890833 | -0.234245622201 |
| H | -0.710008458080 | 0.640874058694  | -0.342562179341 |

## 25-Sigma-5.xyz

51

-1155.27187505

|   |                 |                 |                 |
|---|-----------------|-----------------|-----------------|
| C | 0.092400673381  | -0.144358255259 | 0.103119899835  |
| C | 0.091253705660  | 0.413785686494  | 1.422822059412  |
| C | 1.252415291305  | 0.970591681276  | 1.926614834889  |
| C | 2.449788117522  | 0.983212952942  | 1.173883526072  |
| C | 2.479177317614  | 0.438912026774  | -0.089010950516 |
| C | 1.308445558762  | -0.131271642377 | -0.655443811962 |
| C | 1.313243658774  | -0.682365128963 | -1.965325073736 |
| C | 0.169015210655  | -1.217910858189 | -2.512685266153 |
| C | -1.035615481520 | -1.220767000532 | -1.769962779168 |
| C | -1.072192193582 | -0.697533514616 | -0.495809797426 |
| H | -2.004438393473 | -0.701342319354 | 0.062446174579  |
| H | -1.938414272552 | -1.637370042190 | -2.209913969413 |
| H | 0.186091752674  | -1.634904134106 | -3.516536564536 |
| H | 2.241922185506  | -0.669854513118 | -2.532209244751 |
| H | 3.397564940978  | 0.442313031618  | -0.672342350861 |
| H | 3.346043383599  | 1.423386636099  | 1.603682436510  |
| H | 1.246549698611  | 1.397793769288  | 2.926743805082  |
| C | -1.149572274815 | 0.433883552491  | 2.251246194185  |
| C | -1.836053936918 | 1.620704937008  | 2.415767715688  |
| C | -3.017964636403 | 1.682859936608  | 3.180932400858  |
| C | -3.536820773480 | 0.555874418190  | 3.794829947386  |
| C | -2.834122914190 | -0.688998429595 | 3.685961807096  |
| C | -1.631692220695 | -0.746411756598 | 2.905175100804  |
| C | -0.930846568698 | -1.979412997764 | 2.823759895785  |

|   |                 |                 |                |
|---|-----------------|-----------------|----------------|
| C | -1.383239378783 | -3.103652858770 | 3.478016521464 |
| C | -2.559237458589 | -3.043615224200 | 4.257589406354 |
| C | -3.262594619488 | -1.863652910298 | 4.361229108715 |
| H | -4.154209686371 | -1.825981671305 | 4.979994502992 |
| H | -2.905523751500 | -3.928291614840 | 4.785723329399 |
| H | -0.829080415690 | -4.035824931215 | 3.403834413098 |
| H | -0.015691606392 | -2.024382301376 | 2.240349351634 |
| C | -4.838922923318 | 0.659211234251  | 4.498041017704 |
| C | -5.944656026540 | -0.040172711942 | 4.033005031306 |
| C | -7.205441881727 | 0.131541951473  | 4.621017915853 |
| C | -7.395564608036 | 1.005344300400  | 5.688784679097 |
| C | -6.313780165005 | 1.712202068017  | 6.201480880682 |
| C | -5.016945861491 | 1.527811243333  | 5.626865104280 |
| C | -3.919505037115 | 2.164359123209  | 6.238364370991 |
| C | -4.033394459478 | 3.038826558544  | 7.337047089499 |
| C | -5.267724706498 | 3.289056423231  | 7.869728400257 |
| C | -6.481816350652 | 2.650684837608  | 7.347430577234 |
| H | -7.197581130616 | 3.449935532493  | 7.080378499765 |
| H | -6.997731126371 | 2.149702800074  | 8.185128142178 |
| H | -5.379900037385 | 3.970587844968  | 8.708956102117 |
| H | -3.140973524579 | 3.498609901257  | 7.748004800045 |
| H | -2.926037887856 | 1.962613194017  | 5.846716712670 |
| H | -8.384346867936 | 1.133818910904  | 6.120235425685 |
| H | -8.054514629849 | -0.416331306341 | 4.221562476570 |
| H | -5.839339871722 | -0.702724160452 | 3.178974623167 |
| H | -3.551200539625 | 2.628018997341  | 3.249112271471 |
| H | -1.474753344646 | 2.522278344830  | 1.927848459419 |

## 25-Sigma-6'.xyz

51

-1155.26622120

|   |                 |                 |                 |
|---|-----------------|-----------------|-----------------|
| C | -0.080474999683 | -0.042352729995 | -0.000772545809 |
| C | -0.051629069111 | -0.071222757094 | 1.418447178842  |
| C | 1.208875625480  | 0.009584058389  | 2.095994647758  |
| C | 2.385398015122  | 0.155444264544  | 1.313762330283  |
| C | 2.323165131442  | 0.184313772483  | -0.063229541564 |
| C | 1.081465326450  | 0.076777863045  | -0.729804630958 |
| C | 1.215967663521  | -0.013418018708 | 3.531699206206  |
| C | 0.014227229324  | -0.080373657131 | 4.224775111131  |
| C | -1.220260647326 | -0.160492058975 | 3.547606151935  |
| C | -1.251362615279 | -0.162755074344 | 2.172452788409  |
| C | 2.474627646461  | -0.033684538229 | 4.305541670976  |
| C | 3.403404840199  | -1.042959670133 | 4.132930773211  |
| C | 4.535827229338  | -1.126604237130 | 4.959126857699  |
| C | 4.802672078145  | -0.220058343816 | 5.987925237885  |
| C | 3.899364406591  | 0.839335581346  | 6.196074197081  |
| C | 2.744134620547  | 0.960716262192  | 5.322205248106  |
| C | 4.096686269567  | 1.804132622598  | 7.247060241084  |
| C | 3.284143828400  | 2.875952883023  | 7.387617893675  |
| C | 2.170845773498  | 3.114221511776  | 6.449282940704  |
| C | 1.958854743461  | 2.090012393025  | 5.427885474161  |
| C | 6.045164231166  | -0.383122196235 | 6.797609052060  |
| C | 6.136616033186  | -1.398673017661 | 7.802039790545  |

|   |                 |                 |                 |
|---|-----------------|-----------------|-----------------|
| C | 7.372784710322  | -1.556138449545 | 8.510512954888  |
| C | 8.465655378543  | -0.701774192430 | 8.207905666101  |
| C | 8.346982281795  | 0.274335940524  | 7.246004607845  |
| C | 7.132505702873  | 0.430902423397  | 6.539788647979  |
| C | 7.475858440578  | -2.565139132709 | 9.505081882868  |
| C | 6.407139416515  | -3.382383483175 | 9.798079296496  |
| C | 5.182665940941  | -3.220431651974 | 9.108225546366  |
| C | 5.050178155793  | -2.252488585575 | 8.136337404003  |
| H | 4.100924648400  | -2.136624954965 | 7.620483390531  |
| H | 4.339639790226  | -3.863168280252 | 9.349061979173  |
| H | 6.499516666130  | -4.150786395876 | 10.561402722078 |
| H | 8.418880794494  | -2.679978559110 | 10.035334337804 |
| H | 9.399343091130  | -0.831392994374 | 8.750879246362  |
| H | 9.185404309832  | 0.926863502034  | 7.017268466840  |
| H | 7.056975489761  | 1.197731624237  | 5.772319755620  |
| H | 1.152284180647  | 2.253409989629  | 4.718645118910  |
| H | 2.276364179446  | 4.095505651745  | 5.948367608642  |
| H | 1.217203944386  | 3.256543575955  | 6.993523370633  |
| H | 3.439998143456  | 3.593416940848  | 8.187765863690  |
| H | 4.929893727719  | 1.653360587547  | 7.925684757736  |
| H | -1.042871122438 | -0.108748466550 | -0.503427352394 |
| H | 1.046457964959  | 0.099348421660  | -1.815852637466 |
| H | 3.236880153901  | 0.298048058616  | -0.640868349658 |
| H | -2.198788771824 | -0.230937165429 | 1.642678711646  |
| H | -2.140077155185 | -0.231395360590 | 4.121342942378  |
| H | 0.024614827286  | -0.118828284679 | 5.311166050265  |
| H | 3.239617879206  | -1.809983816646 | 3.382312707553  |
| H | 5.230552946842  | -1.947914573614 | 4.800785893147  |
| H | 3.348203678855  | 0.258747127207  | 1.805198458257  |

## 25-Sigma-6.xyz

51

-1155.26509631

|   |                 |                 |                 |
|---|-----------------|-----------------|-----------------|
| C | 0.099479074028  | -0.180633576440 | 0.072333897531  |
| C | 0.064957447918  | 0.479781749965  | 1.343390224807  |
| C | 1.206168870566  | 1.100411883400  | 1.817364068840  |
| C | 2.414844873482  | 1.080694768082  | 1.082959140835  |
| C | 2.476227819888  | 0.438027625176  | -0.131584153903 |
| C | 1.327117681904  | -0.201560826405 | -0.667313822299 |
| C | 1.364592639470  | -0.856534184149 | -1.927936022586 |
| C | 0.240960635140  | -1.460144861347 | -2.446336157369 |
| C | -0.975226791734 | -1.430067785884 | -1.723218510254 |
| C | -1.043199611613 | -0.806527755492 | -0.496392118800 |
| H | -1.983420196131 | -0.786586577180 | 0.048007356778  |
| H | -1.861649750127 | -1.901434999755 | -2.140652319296 |
| H | 0.283259223555  | -1.956714801783 | -3.412542277652 |
| H | 2.301753717774  | -0.869279770324 | -2.480761841906 |
| H | 3.403857874208  | 0.415127670425  | -0.699643633004 |
| H | 3.294537240919  | 1.573847350092  | 1.488851007918  |
| H | 1.175513244601  | 1.604769534057  | 2.780445824012  |
| C | -1.187691459923 | 0.532507724541  | 2.153147569892  |
| C | -1.911266712611 | 1.707247523979  | 2.211502950497  |
| C | -3.100428716777 | 1.800250218972  | 2.965465272335  |

|   |                 |                 |                |
|---|-----------------|-----------------|----------------|
| C | -3.579313087360 | 0.718717610420  | 3.677006630056 |
| C | -2.848539293944 | -0.510840630088 | 3.669570241983 |
| C | -1.642169374304 | -0.603336183956 | 2.898292302935 |
| C | -0.918125112995 | -1.825940909414 | 2.913928123990 |
| C | -1.356309763647 | -2.906952336263 | 3.646096047560 |
| C | -2.543511485414 | -2.814734070769 | 4.406546886925 |
| C | -3.268157588973 | -1.643549018422 | 4.419307560287 |
| H | -4.172661814936 | -1.579145281578 | 5.017683471587 |
| H | -2.881943061875 | -3.668141163769 | 4.988590251579 |
| H | -0.785082987591 | -3.831806920182 | 3.644441861974 |
| H | 0.000697768264  | -1.898632819379 | 2.339072355942 |
| C | -4.871167319340 | 0.841366443022  | 4.413254128124 |
| C | -6.025607391088 | 0.283447804578  | 3.864774646368 |
| C | -7.299544742922 | 0.395533062786  | 4.466067367943 |
| C | -7.430345563537 | 1.081260220445  | 5.644857566199 |
| C | -6.277025157199 | 1.664394608465  | 6.256927446030 |
| C | -4.971206918618 | 1.538784678513  | 5.638355015463 |
| C | -3.824357945814 | 2.114173115231  | 6.286372058855 |
| C | -3.940148567103 | 2.788076874131  | 7.455619955026 |
| C | -5.247969161805 | 2.962008272490  | 8.114895589561 |
| C | -6.394618925896 | 2.354190790118  | 7.446441544902 |
| H | -7.370923548827 | 2.457165845068  | 7.915009118574 |
| H | -5.468450271983 | 4.034587345714  | 8.281283000192 |
| H | -5.215272823020 | 2.593318509938  | 9.158534506236 |
| H | -3.067453326865 | 3.217162206924  | 7.938884961335 |
| H | -2.854379595340 | 1.996161451129  | 5.814649995047 |
| H | -8.395911367635 | 1.193595085612  | 6.129533127841 |
| H | -8.160874422543 | -0.056130683671 | 3.984486039207 |
| H | -5.940318287113 | -0.255327872439 | 2.924156382293 |
| H | -3.652915573367 | 2.736839735621  | 2.969971718274 |
| H | -1.569898822965 | 2.575076242036  | 1.652785719239 |

## 25-Sigma-7.xyz

51

-1155.26713458

|   |                 |                 |                 |
|---|-----------------|-----------------|-----------------|
| C | 0.086273556445  | -0.152831274995 | 0.080438017509  |
| C | 0.094100855592  | 0.395237095676  | 1.404319354115  |
| C | 1.256383548750  | 0.954411520441  | 1.902861921905  |
| C | 2.447445885322  | 0.977728913370  | 1.140588956371  |
| C | 2.468767021282  | 0.442862852820  | -0.126460428274 |
| C | 1.295993593709  | -0.128199572013 | -0.687746915921 |
| C | 1.292549216583  | -0.668554429010 | -2.002083063829 |
| C | 0.146169033762  | -1.204354535872 | -2.544568603695 |
| C | -1.052384816640 | -1.218346743654 | -1.792226469276 |
| C | -1.080947970587 | -0.705730934729 | -0.513608319681 |
| H | -2.008953795558 | -0.717892995463 | 0.051552031945  |
| H | -1.956992860966 | -1.634955359304 | -2.228402998290 |
| H | 0.156743854667  | -1.612975184827 | -3.551930477625 |
| H | 2.216521111993  | -0.647266960885 | -2.576311071824 |
| H | 3.382326314409  | 0.454665082295  | -0.717178755901 |
| H | 3.345170860989  | 1.418739941869  | 1.566371275669  |
| H | 1.256783125794  | 1.374305338035  | 2.906073231713  |
| C | -1.139229529393 | 0.403767134640  | 2.243429966486  |

|   |                 |                 |                |
|---|-----------------|-----------------|----------------|
| C | -1.824229766649 | 1.588838821805  | 2.428424370239 |
| C | -2.999482528332 | 1.640644343101  | 3.202078762811 |
| C | -3.517590095006 | 0.503306613122  | 3.801994750636 |
| C | -2.812142971565 | -0.740150984390 | 3.676421781416 |
| C | -1.614489732765 | -0.784836874251 | 2.887851094329 |
| C | -0.907348901629 | -2.012753237575 | 2.791008301305 |
| C | -1.348182357899 | -3.144789219538 | 3.439764710478 |
| C | -2.516608287428 | -3.096259646176 | 4.230512443926 |
| C | -3.225866834593 | -1.920925434763 | 4.349005491112 |
| H | -4.108313878931 | -1.893469202107 | 4.980966338306 |
| H | -2.852332295225 | -3.985663854998 | 4.757384134664 |
| H | -0.789344792435 | -4.073106363834 | 3.354292286383 |
| H | 0.004337386687  | -2.047053574200 | 2.201655352848 |
| C | -4.819649620426 | 0.600379206435  | 4.494437801789 |
| C | -5.903359235922 | -0.150749478494 | 4.075551759081 |
| C | -7.177572929285 | 0.038464965122  | 4.643167738487 |
| C | -7.405184779639 | 0.973919662210  | 5.644178406736 |
| C | -6.345351800478 | 1.739267198603  | 6.138198289162 |
| C | -5.019758182321 | 1.536882661587  | 5.582066912058 |
| C | -3.959963301006 | 2.193063560166  | 6.172025412820 |
| C | -4.130614311045 | 3.148616375288  | 7.267015542059 |
| C | -5.513377103429 | 3.381071495509  | 7.729078493454 |
| C | -6.549098706482 | 2.698660628650  | 7.190477453289 |
| H | -7.563256549733 | 2.851313506669  | 7.549022125594 |
| H | -5.670744560283 | 4.105525087559  | 8.522543000100 |
| H | -3.482192048815 | 2.837406544041  | 8.108122844639 |
| H | -3.648523467067 | 4.099731396953  | 6.968986341862 |
| H | -2.945076570925 | 1.993919978714  | 5.839052635591 |
| H | -8.403664668686 | 1.111305847591  | 6.048432701284 |
| H | -8.009697250708 | -0.550302940510 | 4.266558629601 |
| H | -5.785561244882 | -0.860323838884 | 3.262363551546 |
| H | -3.535606482133 | 2.583056291856  | 3.279902655618 |
| H | -1.468108594319 | 2.496160344370  | 1.947747462576 |

## 25-Sigma-8.xyz

51

-1155.27140202

|   |                 |                 |                 |
|---|-----------------|-----------------|-----------------|
| C | 0.095775968782  | -0.220420530149 | 0.046306922206  |
| C | -0.004707993128 | 0.573717631675  | 1.234726784337  |
| C | 1.082834953910  | 1.322512434801  | 1.645156924438  |
| C | 2.300930595049  | 1.308145110595  | 0.926269020826  |
| C | 2.425564423193  | 0.541458983922  | -0.208923953235 |
| C | 1.332880598495  | -0.235101228754 | -0.677543134133 |
| C | 1.435678618191  | -1.022665290934 | -1.855983391473 |
| C | 0.366028282918  | -1.761003565885 | -2.310257806880 |
| C | -0.859832923028 | -1.738778645779 | -1.603357610308 |
| C | -0.990528791517 | -0.987903476621 | -0.455516074483 |
| H | -1.937705740866 | -0.975441678695 | 0.076873222753  |
| H | -1.703738278026 | -2.317709529182 | -1.970575010148 |
| H | 0.458109451125  | -2.358522752469 | -3.213821626481 |
| H | 2.379470478666  | -1.029421469419 | -2.397495833023 |
| H | 3.360778573553  | 0.522843377384  | -0.764592223800 |
| H | 3.137426898918  | 1.905040398041  | 1.280911972028  |



|   |                 |                 |                |
|---|-----------------|-----------------|----------------|
| H | 1.002100382659  | 1.927213578220  | 2.545517381603 |
| C | -1.272242604035 | 0.628273639164  | 2.021350409038 |
| C | -2.084267933796 | 1.740970885072  | 1.927403374856 |
| C | -3.286477232064 | 1.837101633033  | 2.660678038114 |
| C | -3.692355082386 | 0.820393747588  | 3.501151092659 |
| C | -2.883230737259 | -0.352731769610 | 3.629559557556 |
| C | -1.657129745321 | -0.443395730784 | 2.890354041878 |
| C | -0.851106935286 | -1.602766563938 | 3.051013179866 |
| C | -1.236211591412 | -2.631991258916 | 3.880929600424 |
| C | -2.455706913429 | -2.552704254213 | 4.590259697274 |
| C | -3.257594378068 | -1.439858166144 | 4.465695049542 |
| H | -4.197776629765 | -1.392338096192 | 5.009299990294 |
| H | -2.761528339160 | -3.372096537089 | 5.235762624028 |
| H | -0.603244562718 | -3.509056558903 | 3.989205761349 |
| H | 0.085460324938  | -1.669278335155 | 2.504808398211 |
| C | -4.975240223872 | 0.963212014679  | 4.250924236992 |
| C | -6.192257977852 | 0.738655381588  | 3.597078950614 |
| C | -7.432203092681 | 0.884522854449  | 4.241859650969 |
| C | -7.471096006950 | 1.264731497011  | 5.565590413806 |
| C | -6.257040959652 | 1.509609154281  | 6.257095121341 |
| C | -5.001469266510 | 1.358356264037  | 5.596343585912 |
| C | -3.752604775353 | 1.641855143507  | 6.355055511549 |
| C | -3.898621807765 | 2.070209190051  | 7.750496867763 |
| C | -5.122164441270 | 2.197731698537  | 8.353136428366 |
| C | -6.279621384719 | 1.917663839853  | 7.606763931071 |
| H | -7.248417178119 | 2.023140973586  | 8.090680656392 |
| H | -5.209117948732 | 2.511006978894  | 9.387841373356 |
| H | -2.987592178361 | 2.282152405184  | 8.304207562831 |
| H | -3.139189768150 | 2.391786658077  | 5.823061063107 |
| H | -3.082151203327 | 0.762181041986  | 6.344596952277 |
| H | -8.415981526777 | 1.384943928900  | 6.088062217275 |
| H | -8.349645011656 | 0.696704261010  | 3.692797305548 |
| H | -6.171484403000 | 0.438291933840  | 2.552522451583 |
| H | -3.899086964702 | 2.729937964306  | 2.560474513078 |
| H | -1.798802811389 | 2.558472394588  | 1.270069915008 |

## RING CLOSURE SCHOLL REACTION

### 1a.xyz

37

-826.097604158

|   |                 |                 |                 |
|---|-----------------|-----------------|-----------------|
| C | -0.003313603441 | 0.166367530275  | 0.019176788096  |
| C | -0.027563590522 | 0.081068363710  | 1.435933068303  |
| C | 1.209851452436  | 0.060767947237  | 2.155704371927  |
| C | 2.424818837463  | 0.120547984822  | 1.423812302532  |
| C | 2.414612215952  | 0.201815184420  | 0.048525545732  |
| C | 1.191741566854  | 0.226646614832  | -0.661550665933 |
| C | -1.252567417388 | 0.010440313434  | 2.149394924755  |
| C | -1.264125103855 | -0.080077263931 | 3.518877465975  |
| C | -0.034734098216 | -0.096865651786 | 4.207405021664  |
| C | 1.193973902196  | -0.024238302337 | 3.586165602794  |

|   |                 |                 |                 |
|---|-----------------|-----------------|-----------------|
| C | 2.465185649616  | -0.046740550041 | 4.370915162087  |
| C | 2.995616989576  | -1.258767743480 | 4.778408728554  |
| C | 4.205350236295  | -1.318961418759 | 5.508358665314  |
| C | 4.879822526361  | -0.162315896159 | 5.821867552517  |
| C | 4.372909334018  | 1.103913003286  | 5.426886503909  |
| C | 3.144584476309  | 1.173748989691  | 4.692664442077  |
| C | 5.056640309342  | 2.307382504575  | 5.746102881863  |
| C | 4.552571905375  | 3.529534721809  | 5.361904588584  |
| C | 3.336886379205  | 3.599442029887  | 4.641332655028  |
| C | 2.649475652715  | 2.450772459023  | 4.315325057555  |
| N | -0.083194485781 | -0.184011245535 | 5.677799898152  |
| H | -0.947682588417 | 0.181770061160  | -0.519824628397 |
| H | 1.199158892936  | 0.291142577265  | -1.746394418881 |
| H | 3.353987502077  | 0.246086690890  | -0.496348864481 |
| H | 3.369318589173  | 0.098305830364  | 1.959385590517  |
| H | -2.200995103764 | -0.135438796425 | 4.066246495777  |
| H | -2.189519391284 | 0.026449165725  | 1.599049020337  |
| H | 1.716159101839  | 2.518545159550  | 3.762777201212  |
| H | 2.942656330366  | 4.567755774238  | 4.343580176456  |
| H | 5.085022067260  | 4.443542949624  | 5.611965994390  |
| H | 5.988932599709  | 2.245440590894  | 6.303217412648  |
| H | 5.812335650758  | -0.202648677478 | 6.380428697639  |
| H | 4.596791281647  | -2.285502309941 | 5.813543084967  |
| H | 2.479448196419  | -2.181461825592 | 4.522867038216  |
| H | -0.586966457401 | -1.017599369210 | 6.001469309617  |
| H | 0.868216783180  | -0.236405243118 | 6.065611900601  |
| H | -0.542168361009 | 0.630625348028  | 6.101116315928  |

### 1a-sigma-5'.xyz

38

-826.482838884

|   |                 |                 |                 |
|---|-----------------|-----------------|-----------------|
| C | 0.070192157358  | 0.286383891279  | 0.076908016632  |
| C | 0.004964907396  | 0.114738203553  | 1.483981633025  |
| C | 1.217964192132  | 0.103619708622  | 2.244422184282  |
| C | 2.452744337136  | 0.252389108208  | 1.559033188828  |
| C | 2.481447039976  | 0.414622595247  | 0.191239897898  |
| C | 1.282421114910  | 0.435626736275  | -0.557553329498 |
| C | -1.237116298655 | -0.051126047693 | 2.148007804582  |
| C | -1.291724202438 | -0.226956566338 | 3.508012582586  |
| C | -0.089964360572 | -0.234316088182 | 4.242962748903  |
| C | 1.151651003219  | -0.064475493420 | 3.666397404199  |
| C | 2.405143559976  | -0.080998124193 | 4.477204847030  |
| C | 2.981147728959  | -1.285146125524 | 4.842952434031  |
| C | 4.180548924833  | -1.312907426807 | 5.581116983151  |
| C | 4.822919447349  | -0.141254462200 | 5.953186833276  |
| C | 4.272600358898  | 1.092881987822  | 5.602761817400  |
| C | 3.053276828181  | 1.136608677068  | 4.866658973573  |
| C | 4.940610225722  | 2.365352683609  | 5.985472446991  |
| C | 4.278974527007  | 3.612724377817  | 5.596598678909  |
| C | 3.098366069712  | 3.619947135697  | 4.899263549471  |
| C | 2.505451524419  | 2.398360295668  | 4.543346348183  |
| N | -0.201260755918 | -0.414731048088 | 5.701682572702  |
| H | -0.856780954132 | 0.295490610671  | -0.491086949171 |

|   |                 |                 |                 |
|---|-----------------|-----------------|-----------------|
| H | 1.322127606930  | 0.565843860705  | -1.635543074084 |
| H | 3.435431351316  | 0.525250117650  | -0.317139371344 |
| H | 3.385145736299  | 0.229523143923  | 2.115217869647  |
| H | -2.244048407548 | -0.355127458173 | 4.014534327383  |
| H | -2.154838493136 | -0.040919655754 | 1.566439067062  |
| H | 1.569404932703  | 2.427819978489  | 3.990722957204  |
| H | 2.617832403193  | 4.550891587054  | 4.618700559473  |
| H | 4.759408178280  | 4.545856953803  | 5.878861342860  |
| H | 5.972220656656  | 2.387924836754  | 5.586816230465  |
| H | 5.751208823514  | -0.181034544472 | 6.515862886472  |
| H | 4.610577821682  | -2.272279863574 | 5.853839296626  |
| H | 2.512512969890  | -2.219727459533 | 4.547867262542  |
| H | -0.740116109115 | -1.255287066512 | 5.941764789783  |
| H | 0.718633957330  | -0.515394772597 | 6.146610315589  |
| H | 5.121810480665  | 2.393742027581  | 7.075392432907  |
| H | -0.668102645541 | 0.380839624235  | 6.153757712428  |

### 1a-TS-ring\_closure.xyz

38

SCF=-826.450460622 ; NI=1 ; Neg-freq =-377.9257

|   |                 |                 |                 |
|---|-----------------|-----------------|-----------------|
| C | 0.208436883177  | 1.005687924887  | 0.479651590738  |
| C | 0.090375313799  | 0.288139277077  | 1.701286368122  |
| C | 1.214193139747  | 0.209991701299  | 2.563977637315  |
| C | 2.466415122608  | 0.829981941203  | 2.155742482115  |
| C | 2.509350813552  | 1.530563735457  | 0.926043334170  |
| C | 1.380929298346  | 1.652940666025  | 0.117806841529  |
| C | -1.141964715185 | -0.283483680798 | 2.100560753954  |
| C | -1.270570308602 | -0.830190067383 | 3.355202586796  |
| C | -0.175000251362 | -0.799216221200 | 4.233126282236  |
| C | 1.077565717895  | -0.317016821426 | 3.877818988564  |
| C | 2.238875810089  | -0.206300788357 | 4.788284311367  |
| C | 2.645828849152  | -1.241519254705 | 5.627303529692  |
| C | 3.781686843043  | -1.093130750289 | 6.432654292790  |
| C | 4.542172363439  | 0.063673304434  | 6.358660437595  |
| C | 4.192847734566  | 1.095414196259  | 5.474322576273  |
| C | 3.020112911489  | 0.978266278038  | 4.716194428147  |
| C | 5.085671303723  | 2.293902572628  | 5.338321135412  |
| C | 4.708884965692  | 3.235541816969  | 4.256115386171  |
| C | 3.597402528436  | 3.102642899010  | 3.503366455468  |
| C | 2.659711600881  | 2.023967341460  | 3.737345676705  |
| N | -0.431569784528 | -1.240921408584 | 5.614063147817  |
| H | -0.660778022631 | 1.063526612088  | -0.170659315286 |
| H | 1.430860701958  | 2.208405249006  | -0.813027662564 |
| H | 3.456460983767  | 1.952168544867  | 0.600811347431  |
| H | 3.395537665979  | 0.333596671904  | 2.426435309832  |
| H | -2.221255434440 | -1.240159778151 | 3.683101586053  |
| H | -1.994230591540 | -0.249303562741 | 1.429022447747  |
| H | 1.614190968239  | 2.324448719122  | 3.705374583816  |
| H | 3.335319564734  | 3.857365594848  | 2.767830817912  |
| H | 5.345119518682  | 4.106809890614  | 4.117848204412  |
| H | 6.125166631451  | 1.964293673908  | 5.187578613908  |
| H | 5.441101797322  | 0.163019985489  | 6.961964992035  |
| H | 4.082789193481  | -1.904106232732 | 7.089156416391  |

|   |                 |                 |                |
|---|-----------------|-----------------|----------------|
| H | 2.129372038651  | -2.197616091596 | 5.619874896122 |
| H | -0.573526184354 | -2.256022576369 | 5.684308868986 |
| H | 0.341745829991  | -0.994344577440 | 6.245000132985 |
| H | 5.119411581492  | 2.850811727495  | 6.289077365628 |
| H | -1.275853382739 | -0.797074512315 | 5.994729151615 |

**Intermediary\_for\_the\_formation\_of\_4\_Table\_3.xyz**

38

-826.459650103

|   |                 |                 |                 |
|---|-----------------|-----------------|-----------------|
| C | 0.174134293832  | 0.949039739027  | 0.478813499528  |
| C | 0.062359517552  | 0.275276333797  | 1.719879637233  |
| C | 1.141416700994  | 0.345003534733  | 2.632904187061  |
| C | 2.360320324201  | 1.129603821655  | 2.303636846003  |
| C | 2.329568537467  | 1.839175629946  | 1.021998334732  |
| C | 1.287607469065  | 1.723317700948  | 0.132629188957  |
| C | -1.123378679479 | -0.412636692962 | 2.069166243725  |
| C | -1.245211147804 | -0.942199444639 | 3.334488246632  |
| C | -0.177594786049 | -0.825116963908 | 4.232465466360  |
| C | 1.055417238915  | -0.251321814950 | 3.906797922449  |
| C | 2.233683225997  | -0.168278276180 | 4.792454822838  |
| C | 2.579564982326  | -1.196132588453 | 5.678910868791  |
| C | 3.702054960802  | -1.067735871726 | 6.495385336743  |
| C | 4.493634458074  | 0.069785890597  | 6.405471410289  |
| C | 4.203432882877  | 1.084504310184  | 5.481862890329  |
| C | 3.071419564719  | 0.965825035947  | 4.670550598246  |
| C | 5.136668624061  | 2.262678761974  | 5.370913381332  |
| C | 4.886457037426  | 3.122881216038  | 4.176248702594  |
| C | 3.833230624557  | 2.987257948021  | 3.365547245403  |
| C | 2.749077796065  | 1.979795075477  | 3.591124813890  |
| N | -0.435087601006 | -1.291614850208 | 5.603906740837  |
| H | -0.652761795803 | 0.872052214742  | -0.223534801799 |
| H | 1.318243173856  | 2.227257475482  | -0.827202353344 |
| H | 3.201327957936  | 2.428323119381  | 0.751716346023  |
| H | 3.212450504943  | 0.426317115625  | 2.184638354171  |
| H | -2.166572169147 | -1.427318035026 | 3.642864418936  |
| H | -1.941236937847 | -0.484652168487 | 1.359632042647  |
| H | 1.826880397925  | 2.521977715545  | 3.851705511080  |
| H | 3.695719711571  | 3.689787538297  | 2.547125732186  |
| H | 5.601801628922  | 3.921690931539  | 3.989804913279  |
| H | 6.176256241587  | 1.906965778032  | 5.362105741433  |
| H | 5.375897841785  | 0.165375352793  | 7.034408878795  |
| H | 3.965895647148  | -1.868233064896 | 7.180329607711  |
| H | 2.030575744617  | -2.133636620010 | 5.694178590227  |
| H | -0.448012178260 | -2.316722016369 | 5.677349749870  |
| H | 0.267290303276  | -0.942039315328 | 6.269045592541  |
| H | 5.059467580715  | 2.880504753435  | 6.279641027534  |
| H | -1.349214677810 | -0.962005270076 | 5.937311264739  |

**2a.xyz**

43

-904.677226289

|   |                 |                |                 |
|---|-----------------|----------------|-----------------|
| C | -0.113376852975 | 0.077869989685 | -0.054399245478 |
|---|-----------------|----------------|-----------------|

|   |                 |                 |                 |
|---|-----------------|-----------------|-----------------|
| C | -0.089182132566 | -0.032134209796 | 1.323820749165  |
| C | 1.169485149933  | -0.088068651050 | 2.007842004707  |
| C | 2.376036968084  | -0.071716364807 | 1.235140281512  |
| C | 2.299467690765  | 0.015682180002  | -0.179926359723 |
| C | 1.080668196975  | 0.095022389777  | -0.811477280112 |
| C | 3.627437911816  | -0.136555503752 | 1.904787501894  |
| C | 3.692005761231  | -0.207419372423 | 3.278092330459  |
| C | 2.501445785761  | -0.215632422731 | 4.042808254495  |
| C | 1.272095727203  | -0.158482055617 | 3.423393512048  |
| C | -1.371728837128 | 0.011065976490  | 2.094297605673  |
| C | -1.815948380708 | 1.286781185764  | 2.590581479448  |
| C | -3.038726178166 | 1.390864416945  | 3.327121919339  |
| C | -3.805600771284 | 0.223976872761  | 3.559302460633  |
| C | -3.383166878645 | -0.988706796083 | 3.079986295113  |
| C | -2.174593960589 | -1.087172692333 | 2.353464308224  |
| C | -1.068079098190 | 2.474735062634  | 2.363350484774  |
| C | -1.505158357579 | 3.690264076263  | 2.841796795775  |
| C | -2.712535812128 | 3.786490307425  | 3.572213413537  |
| C | -3.462742622227 | 2.657802556081  | 3.808288623778  |
| N | -1.868828343932 | -2.469102398388 | 1.886525169153  |
| C | -2.098788836147 | -2.675326133964 | 0.414398296456  |
| C | -0.549706987700 | -3.034442466510 | 2.328051578894  |
| H | -4.393970150286 | 2.718588228032  | 4.366529146330  |
| H | -3.044859716894 | 4.752442079208  | 3.943218665556  |
| H | -0.917126685855 | 4.584975627397  | 2.654401605886  |
| H | -0.142155019262 | 2.422354684152  | 1.799813040550  |
| H | -3.982539102878 | -1.877973551351 | 3.261201067092  |
| H | -4.733347683873 | 0.293829798159  | 4.120663202710  |
| H | 0.366014200837  | -0.164845210394 | 4.023477783980  |
| H | 2.558126996977  | -0.267897546605 | 5.127156645272  |
| H | 4.655677234638  | -0.255963644562 | 3.778635729106  |
| H | 4.537995890707  | -0.127544596549 | 1.309496042596  |
| H | 3.221932980847  | 0.027206888021  | -0.756247575413 |
| H | 1.024336370389  | 0.174276303935  | -1.893750690109 |
| H | -1.067585302158 | 0.169151363107  | -0.567869057441 |
| H | 0.251636008254  | -2.550743334947 | 1.775738487118  |
| H | -0.442382653809 | -2.864005833359 | 3.398696724014  |
| H | -0.563346867278 | -4.104026623131 | 2.114028141969  |
| H | -2.075710029094 | -3.748219427871 | 0.219621521310  |
| H | -1.307423628895 | -2.172579427650 | -0.136190506380 |
| H | -3.073643640313 | -2.260808072472 | 0.158225794734  |
| H | -2.571322000798 | -3.051588761351 | 2.351503544890  |

## 2a-sigma-5'.xyz

44

-905.070772200

|   |                 |                 |                 |
|---|-----------------|-----------------|-----------------|
| C | 0.033871746988  | -0.099985727107 | 0.057932849670  |
| C | 0.028939350163  | -0.037974777932 | 1.469965307746  |
| C | 1.279103890367  | -0.049213793198 | 2.153308496409  |
| C | 2.540662312686  | -0.118555431837 | 1.369266315899  |
| C | 2.421496492954  | -0.183099443659 | -0.088456047140 |
| C | 1.202451592670  | -0.174535042340 | -0.716106057763 |
| C | -1.196639744222 | 0.025859699121  | 2.213807204878  |

|   |                 |                 |                 |
|---|-----------------|-----------------|-----------------|
| C | -1.127542432755 | 0.065468821169  | 3.596282354396  |
| C | 0.116028603116  | 0.059450134176  | 4.257501694558  |
| C | 1.305817001503  | 0.004598716004  | 3.548052485641  |
| C | -2.524334844015 | 0.021716675923  | 1.526692704814  |
| C | -3.077175951497 | -1.214736564674 | 1.055931734967  |
| C | -4.345195298614 | -1.208194949647 | 0.391891784155  |
| C | -5.033960104774 | 0.018751451277  | 0.222013870616  |
| C | -4.508119277333 | 1.195236229558  | 0.693506757229  |
| C | -3.258023695640 | 1.180760725647  | 1.345136900548  |
| C | -2.411884207035 | -2.456797491795 | 1.236290766132  |
| C | -2.970111513107 | -3.627376063970 | 0.771483911717  |
| C | -4.216993348957 | -3.617179340551 | 0.105062001148  |
| C | -4.890408525154 | -2.430927749992 | -0.078316629750 |
| N | -2.726758816581 | 2.470393527001  | 1.842729951789  |
| C | -3.602539304209 | 3.088613057190  | 2.897415952973  |
| C | -2.433612853223 | 3.450157741561  | 0.740135225234  |
| H | -5.852778528229 | -2.413016054861 | -0.583889620178 |
| H | -4.642984367791 | -4.548859893220 | -0.257069164349 |
| H | -2.448009740300 | -4.568441535215 | 0.921724312674  |
| H | -1.458399844788 | -2.489006864253 | 1.754832656932  |
| H | -5.054415607602 | 2.123090442480  | 0.556938910251  |
| H | -5.994891994377 | 0.022918244206  | -0.285203894826 |
| H | -0.921681006439 | -0.089083078401 | -0.461111835244 |
| H | 1.127238279809  | -0.221783345253 | -1.796969531952 |
| H | 3.340043927250  | -0.237298951775 | -0.666760729225 |
| H | 3.195572233790  | 0.735557000310  | 1.622557387967  |
| H | 2.256819421963  | -0.001796369230 | 4.072833145412  |
| H | 0.136614288098  | 0.092319009866  | 5.342889061182  |
| H | -2.040482648304 | 0.083909749691  | 4.184211641779  |
| H | -1.949221581691 | 4.319846615868  | 1.185046324718  |
| H | -1.775138216633 | 2.975944034458  | 0.014007175370  |
| H | -3.372389124474 | 3.741581990155  | 0.271128097099  |
| H | -4.545690410279 | 3.385506389211  | 2.441451163888  |
| H | -3.084845090581 | 3.962614563560  | 3.293193061736  |
| H | -3.775342857688 | 2.355579711159  | 3.684363344266  |
| H | -1.829559783633 | 2.263035965055  | 2.297329060959  |
| H | 3.153216585586  | -0.975981116796 | 1.704301194827  |

## 2a-TS-ring\_closure.xyz

44

SCF=-905.038087026 ; NI=1 ; Neg-freq =-377.3796

|   |                 |                 |                 |
|---|-----------------|-----------------|-----------------|
| C | 0.012606965250  | 0.019603188703  | -0.012494393121 |
| C | 0.006709848165  | 0.004213935136  | 1.408726751327  |
| C | 1.243770203881  | 0.003955660305  | 2.103555826005  |
| C | 2.483311888960  | -0.020828946299 | 1.340241983097  |
| C | 2.413010697595  | -0.001417249401 | -0.073731268931 |
| C | 1.192119921709  | 0.061355404853  | -0.741794367162 |
| C | -1.204018143958 | 0.064750267678  | 2.139510714297  |
| C | -1.177002522232 | 0.226443008709  | 3.504052721878  |
| C | 0.058092670374  | 0.342442788479  | 4.165625857671  |
| C | 1.278203153482  | 0.204431569345  | 3.511284910783  |
| C | 2.608466451865  | 0.373579983295  | 4.142451427863  |
| C | 3.583163683232  | 1.120796945990  | 3.428355964974  |

|   |                 |                 |                 |
|---|-----------------|-----------------|-----------------|
| C | 4.890620588335  | 1.227777247455  | 3.921982541252  |
| C | 5.202825886119  | 0.654123911773  | 5.163903344267  |
| C | 4.255718442308  | -0.077283690350 | 5.863361223646  |
| C | 2.967357079793  | -0.243326190205 | 5.339541975297  |
| C | 5.960320260050  | 1.924108714690  | 3.132708110985  |
| C | 5.562553836943  | 2.332057970876  | 1.763155577456  |
| C | 4.311906256288  | 2.194751075012  | 1.276385440229  |
| C | 3.245168032714  | 1.658654022193  | 2.095567603035  |
| N | 0.033132661937  | 0.713347510591  | 5.596146184338  |
| C | -0.574234535885 | 2.073354400623  | 5.817863206784  |
| C | -0.611788591546 | -0.328250235864 | 6.468054417470  |
| H | -0.941998128180 | 0.025880051583  | -0.532771037097 |
| H | 1.161094440174  | 0.093120011740  | -1.826011901394 |
| H | 3.337677843921  | -0.066802050593 | -0.640433250752 |
| H | 3.324602863993  | -0.579417399366 | 1.743906696958  |
| H | -2.110663211164 | 0.307967845375  | 4.051319578609  |
| H | -2.153120260904 | 0.028626106859  | 1.613680314261  |
| H | 2.300499912089  | 2.191385965804  | 2.007418635266  |
| H | 4.059323525323  | 2.569938582504  | 0.289106091039  |
| H | 6.320351164695  | 2.821539035922  | 1.155569769543  |
| H | 6.309428523622  | 2.818221062795  | 3.674875981222  |
| H | 6.211451333215  | 0.754345704139  | 5.556900973002  |
| H | 4.518158954556  | -0.556238450765 | 6.801961672373  |
| H | 2.281212199354  | -0.917166236816 | 5.846898868827  |
| H | -0.039651880796 | 2.794643643396  | 5.200367335738  |
| H | -1.627895446115 | 2.040461030118  | 5.545490661941  |
| H | -0.465225048998 | 2.316951621399  | 6.874712228505  |
| H | -1.677361781379 | -0.362387465152 | 6.246337828083  |
| H | -0.452848517946 | -0.039256573210 | 7.507527483512  |
| H | -0.153664304579 | -1.295155647403 | 6.261724650662  |
| H | 1.012920717389  | 0.790700832520  | 5.896973532371  |
| H | 6.853392608932  | 1.283126217752  | 3.076244446511  |

### **Intermediary\_for\_the\_formation\_of\_5\_Table\_3.xyz**

44

-905.047366496

|   |                 |                 |                 |
|---|-----------------|-----------------|-----------------|
| C | -0.370606952191 | -1.042379931674 | 0.314102198261  |
| C | -0.069442892918 | -0.294557407790 | 1.596636284474  |
| C | 1.209856837278  | -0.279563098231 | 2.160144615310  |
| C | 2.380648640778  | -0.943627485008 | 1.482210958811  |
| C | 2.000083937569  | -1.813528140232 | 0.329890217256  |
| C | 0.767521067642  | -1.878433945962 | -0.181365283324 |
| C | -1.147436661621 | 0.320806059541  | 2.275799588546  |
| C | -0.938887712769 | 0.876943596170  | 3.544731567012  |
| C | 0.341126189478  | 0.903621534289  | 4.097285546644  |
| C | 1.404641130286  | 0.345737102551  | 3.400321495183  |
| C | -2.480014318227 | 0.273202657375  | 1.634978893344  |
| C | -2.785470303239 | -0.856792268816 | 0.850703486039  |
| C | -4.050808426605 | -0.997840217265 | 0.233640630099  |
| C | -5.036934900807 | 0.000760681013  | 0.405513490277  |
| C | -4.723688642895 | 1.144821125948  | 1.104526828858  |
| C | -3.452330118810 | 1.282748982409  | 1.678852764032  |
| C | -1.710782533638 | -1.853252250434 | 0.602434007133  |

|   |                 |                 |                 |
|---|-----------------|-----------------|-----------------|
| C | -2.049585297070 | -2.932510362751 | -0.329617974859 |
| C | -3.302152486643 | -3.075761573828 | -0.877523192458 |
| C | -4.286660515549 | -2.121108385824 | -0.595734305652 |
| N | -3.121274866958 | 2.591165621628  | 2.280595948070  |
| C | -4.006332393460 | 2.957587177487  | 3.441722633867  |
| C | -3.076500313113 | 3.687157028344  | 1.245950358238  |
| H | -5.270921254461 | -2.230528525862 | -1.045505957072 |
| H | -3.531210194077 | -3.912898682869 | -1.527891751749 |
| H | -1.285650576981 | -3.676470820842 | -0.537412683052 |
| H | -1.494096925088 | -2.390151729525 | 1.550360504701  |
| H | -5.459796197926 | 1.937229292753  | 1.186153325954  |
| H | -6.016657759347 | -0.117017910788 | -0.046076033050 |
| H | -0.644783358350 | -0.331403055940 | -0.480210524205 |
| H | 0.583797725601  | -2.497702765086 | -1.056107065770 |
| H | 2.796562168642  | -2.399633345916 | -0.124715873979 |
| H | 3.087653065799  | -0.174432059724 | 1.132993620855  |
| H | 2.400911623870  | 0.355130872965  | 3.836668397262  |
| H | 0.494841490348  | 1.335651868423  | 5.081783729575  |
| H | -1.772831790262 | 1.217265356278  | 4.153832033080  |
| H | -2.723395701418 | 4.592295270962  | 1.740492034255  |
| H | -2.387349568883 | 3.387751252227  | 0.457221862328  |
| H | -4.076880265972 | 3.840927055432  | 0.844255241084  |
| H | -5.005337015651 | 3.181251753932  | 3.070742120621  |
| H | -3.579231397304 | 3.838425007190  | 3.921140952352  |
| H | -4.043077540988 | 2.120600423135  | 4.138159691542  |
| H | -2.163167521439 | 2.510342068737  | 2.646099658786  |
| H | 2.946683947362  | -1.529674184421 | 2.219370661317  |

### 3.xyz

38

-884.802364960

|   |                 |                 |                 |
|---|-----------------|-----------------|-----------------|
| C | 3.038828331525  | -0.920719157590 | -3.364179597643 |
| C | 3.325735271077  | -0.317356066356 | -4.618108407119 |
| C | 3.023690151857  | 1.004867409550  | -4.853316075540 |
| C | 2.417176706588  | 1.778555979472  | -3.833694791503 |
| C | 2.128346998452  | 1.223425076125  | -2.606568838671 |
| C | 2.429889013399  | -0.140364119177 | -2.327210318766 |
| C | 2.142177578743  | -0.739497640478 | -1.064865234116 |
| C | 2.452018298152  | -2.081869679974 | -0.860990492298 |
| C | 3.053719853550  | -2.853330667815 | -1.887296285217 |
| C | 3.337754741990  | -2.280051670887 | -3.105099231843 |
| C | 1.533206968179  | 0.058598035568  | 0.040290474240  |
| C | 0.113339786074  | 0.107150398458  | 0.217685124632  |
| C | -0.785444385999 | -0.583796659616 | -0.639762145811 |
| C | -2.147638346283 | -0.518874876740 | -0.443091581356 |
| C | -2.682324196387 | 0.243073981399  | 0.623524351904  |
| C | -1.839662262084 | 0.926433127303  | 1.471398041788  |
| C | -0.430095040516 | 0.880886052560  | 1.295057513047  |
| C | 0.448671837854  | 1.584389876798  | 2.160474328276  |
| C | 1.809877451752  | 1.528001077536  | 1.967866752500  |
| C | 2.347914792968  | 0.764067511243  | 0.906017289432  |
| O | 2.149038414603  | -2.596916412015 | 0.361676574500  |
| C | 2.439524837457  | -3.963308935760 | 0.627289171187  |



|   |                 |                 |                 |
|---|-----------------|-----------------|-----------------|
| H | 3.790428410912  | -0.923723613561 | -5.393312742063 |
| H | 3.247274030274  | 1.456638867431  | -5.816472918153 |
| H | 2.176806290200  | 2.822255618417  | -4.022671752437 |
| H | 1.664900131415  | 1.829938033087  | -1.833366245927 |
| H | 3.294886267121  | -3.897311170879 | -1.719516541290 |
| H | 3.800676109136  | -2.878976875764 | -3.886477593702 |
| H | -0.381574392541 | -1.170878455588 | -1.460655489239 |
| H | -2.818012222680 | -1.055432272779 | -1.110258670369 |
| H | -3.758778243834 | 0.286866647861  | 0.769927929904  |
| H | -2.243435448421 | 1.515207355852  | 2.292733665819  |
| H | 0.028243442927  | 2.169608682421  | 2.975835127282  |
| H | 2.480744912656  | 2.069383239725  | 2.630474843431  |
| H | 3.426305555213  | 0.728257099870  | 0.767984249333  |
| H | 2.110369095223  | -4.139489820914 | 1.652420357273  |
| H | 1.889126066888  | -4.628058641487 | -0.048947164535 |
| H | 3.514604641191  | -4.165334668754 | 0.552945945965  |

### 3-sigma-1.xyz

39

-885.207593173

|   |                 |                 |                 |
|---|-----------------|-----------------|-----------------|
| C | 0.842470066043  | 0.263356752613  | 1.993735160658  |
| C | -0.129300717407 | 0.137373687447  | 1.019922306829  |
| C | 0.242801170522  | 0.027767246508  | -0.356519128600 |
| C | 1.641748629967  | 0.065889040049  | -0.684022960348 |
| C | 2.604802113009  | 0.195837175220  | 0.349132665936  |
| C | 2.214133001092  | 0.289831885495  | 1.664275822729  |
| C | 2.043256694681  | -0.029781233191 | -2.043533058788 |
| C | 1.115598691466  | -0.160657983329 | -3.050699071234 |
| C | -0.261953760009 | -0.202879387548 | -2.734126266045 |
| C | -0.684296081036 | -0.113148719875 | -1.426218746896 |
| C | -1.592733501138 | 0.112738931703  | 1.470260855269  |
| C | -2.002727893897 | 1.336209292350  | 2.257053548027  |
| C | -2.748831148303 | 1.201428950598  | 3.451826077708  |
| C | -3.060899112068 | -0.102941628474 | 3.933717494120  |
| C | -2.681425591439 | -1.270828478877 | 3.304913003309  |
| C | -1.945603429159 | -1.195952275883 | 2.116702308562  |
| C | -1.695334822100 | 2.613467480380  | 1.794637995866  |
| C | -2.117726887213 | 3.737938363081  | 2.504340212787  |
| C | -2.852440240694 | 3.609827905709  | 3.691070439521  |
| C | -3.166764878362 | 2.347357583031  | 4.164085847599  |
| O | -1.534617715134 | -2.228757592426 | 1.443828350427  |
| C | -1.828935692455 | -3.575668190717 | 1.881595376779  |
| H | -3.735865350441 | 2.223984244384  | 5.081711322039  |
| H | -3.171859479922 | 4.494432994418  | 4.233650951606  |
| H | -1.869190953095 | 4.726894786250  | 2.128888528039  |
| H | -1.121121576286 | 2.736770984284  | 0.880608696978  |
| H | -2.945598156927 | -2.227072283955 | 3.739809421152  |
| H | -3.630793031856 | -0.180692665857 | 4.857247666568  |
| H | -1.751585687877 | -0.157623490326 | -1.229007347722 |
| H | -0.995371324339 | -0.309429876519 | -3.529231284473 |
| H | 1.435980774358  | -0.233227124300 | -4.086731897453 |
| H | 3.106145176475  | 0.001938273593  | -2.273288626470 |
| H | 3.659009677797  | 0.220262748676  | 0.082538962614  |

|   |                 |                 |                |
|---|-----------------|-----------------|----------------|
| H | 2.952691342746  | 0.388532090488  | 2.455163418451 |
| H | 0.550521653612  | 0.351097829306  | 3.038199671416 |
| H | -1.374761669487 | -4.216591561900 | 1.129069494449 |
| H | -1.374763146125 | -3.752948337068 | 2.858480842337 |
| H | -2.909905396913 | -3.726764595568 | 1.911030502258 |
| H | -2.234832208083 | 0.123506130231  | 0.574659523996 |

### Intermediary\_for\_the\_formation\_of\_6.xyz

39

-885.071545504

|   |                 |                 |                 |
|---|-----------------|-----------------|-----------------|
| C | 0.113213664789  | -0.161118224137 | -0.096240975592 |
| C | 0.097227553405  | 0.120786524714  | 1.281200603779  |
| C | 1.317269605085  | 0.217999425840  | 1.955586590970  |
| C | 2.538771484598  | -0.028994345201 | 1.260979963968  |
| C | 2.511307475746  | -0.396658283952 | -0.099970932072 |
| C | 1.302223270899  | -0.444842805818 | -0.771847058025 |
| C | 3.782198800250  | 0.223308598991  | 1.913458509038  |
| C | 3.849230579225  | 0.848457946471  | 3.160564855230  |
| C | 2.686010939521  | 1.111244237026  | 3.852199328788  |
| C | 1.403319300389  | 0.500578993855  | 3.430504424660  |
| C | -1.091455337667 | 0.780661412023  | 3.470177605032  |
| C | -2.252835003096 | 0.942244256821  | 4.218935825660  |
| C | -3.503112247489 | 0.575815768564  | 3.643660297110  |
| C | -3.604347767702 | -0.087124256853 | 2.435758495003  |
| C | -2.441499254738 | -0.318369806428 | 1.689073080730  |
| C | 0.219247692216  | 1.220458265347  | 4.050151981607  |
| C | 0.176220413886  | 0.931993058993  | 5.524778207769  |
| C | -0.973179128575 | 1.142073051026  | 6.260763888875  |
| C | -2.204233168413 | 1.269738862877  | 5.612178099755  |
| O | -2.379146410240 | -1.136777212582 | 0.681513705711  |
| C | -3.536131884648 | -1.894142940944 | 0.259350558671  |
| H | -3.127657377925 | 1.415809481963  | 6.164086085353  |
| H | -0.937870765724 | 1.097192446009  | 7.347392131176  |
| H | 1.087970094157  | 0.609452910641  | 6.021978520275  |
| H | 0.370713623766  | 2.322970849870  | 3.868240077448  |
| H | -4.559609045195 | -0.484634003757 | 2.114216813094  |
| H | -4.409381302561 | 0.746569032735  | 4.220415266136  |
| H | 1.401920660421  | -0.532005111452 | 3.891153401625  |
| H | 2.709380509151  | 1.689060914058  | 4.772324046700  |
| H | 4.809155375746  | 1.184085920662  | 3.543219701114  |
| H | 4.698175682401  | 0.028648151778  | 1.360757129679  |
| H | 3.445535381911  | -0.600708587221 | -0.616822530437 |
| H | 1.270824805629  | -0.685961344069 | -1.830585612593 |
| H | -0.811924973282 | -0.154218650273 | -0.659392873784 |
| H | -3.176653596200 | -2.517447580469 | -0.556822385610 |
| H | -3.893973055635 | -2.511763027523 | 1.085554792959  |
| H | -4.314067478026 | -1.214259763216 | -0.094187848787 |
| C | -1.201540326159 | 0.478591752546  | 1.996374341173  |
| H | -1.493102789916 | 1.466156081086  | 1.561412887814  |

8a.xyz

34

-786.801054781

|   |                 |                 |                 |
|---|-----------------|-----------------|-----------------|
| C | -0.006899007796 | -0.070594885686 | 0.003021370364  |
| C | 0.011252341712  | -0.013321925456 | 1.385690960735  |
| C | 1.252099811523  | 0.010422823457  | 2.100138256682  |
| C | 2.465951659201  | 0.005633651027  | 1.339833276173  |
| C | 2.405287918210  | -0.032901587510 | -0.077998104117 |
| C | 1.197137196503  | -0.076348715881 | -0.734005150201 |
| C | 3.710201119614  | 0.025078380905  | 2.024434662857  |
| C | 3.759216604772  | 0.037080220467  | 3.399818232432  |
| C | 2.560461571816  | 0.023291188997  | 4.150536016174  |
| C | 1.336730299171  | 0.008539393079  | 3.517854819661  |
| C | -1.285712640222 | 0.006631808393  | 2.102676277497  |
| C | -1.816851010683 | 1.126787019034  | 2.788637146148  |
| C | -3.095963171699 | 1.001847128171  | 3.424708798793  |
| C | -3.793590067057 | -0.230154863516 | 3.329034449807  |
| C | -3.245758127280 | -1.268457443346 | 2.636339061423  |
| N | -2.018694144085 | -1.112519250110 | 2.055928922043  |
| C | -3.631407580514 | 2.116060376460  | 4.112804764366  |
| C | -2.933361109070 | 3.302891656716  | 4.155850629990  |
| C | -1.679518225544 | 3.431389334482  | 3.510997494963  |
| C | -1.127475070192 | 2.366960354873  | 2.837913422191  |
| H | -4.598405922410 | 2.022613734184  | 4.598854928816  |
| H | -3.350700671236 | 4.155546907329  | 4.684095392537  |
| H | -1.153298064308 | 4.380672439782  | 3.546817489288  |
| H | -0.169689028671 | 2.467750361529  | 2.337900721783  |
| H | -4.764356117529 | -0.350382355646 | 3.797696945750  |
| H | -3.711839814906 | -2.236847812561 | 2.509276989567  |
| H | 0.428435084718  | -0.011947835670 | 4.113908780809  |
| H | 2.605172045130  | 0.020751382298  | 5.236479712390  |
| H | 4.717147016960  | 0.050313871486  | 3.912901220014  |
| H | 4.627035517008  | 0.024804858455  | 1.439280711026  |
| H | 3.335756075595  | -0.033408986727 | -0.641038621564 |
| H | 1.157931707718  | -0.109049992897 | -1.818951589083 |
| H | -0.956631298506 | -0.085605962646 | -0.525976270916 |
| H | -1.622398251195 | -1.908910972915 | 1.562148045918  |

### 8a-sigma-5'.xyz

35

-787.182942255

|   |                 |                 |                 |
|---|-----------------|-----------------|-----------------|
| C | 1.427031868933  | 0.821924486475  | -1.569788591191 |
| C | 1.334338891830  | 0.597775204391  | -0.176086006293 |
| C | 0.121140365865  | 0.544156184320  | 0.523885191722  |
| C | -1.055206362551 | 0.717201884776  | -0.161379650996 |
| C | -1.080459852427 | 0.964606913686  | -1.603114828114 |
| C | 0.226646379588  | 1.026677812662  | -2.307534031798 |
| C | 0.291859700131  | 1.291346681509  | -3.677822653141 |
| C | 1.522418558198  | 1.356948588865  | -4.312280000835 |
| C | 2.719789888990  | 1.153476105889  | -3.600205999963 |
| C | 2.685981905426  | 0.879521562512  | -2.246017461070 |
| C | 3.969255543824  | 0.667808816699  | -1.524424971460 |
| C | 5.736390520021  | -0.652713736957 | -0.467992372792 |
| C | 6.243817288141  | -1.910921095771 | -0.068501981748 |
| C | 5.527395832390  | -3.058349656902 | -0.326762751735 |

|   |                 |                 |                 |
|---|-----------------|-----------------|-----------------|
| C | 4.281804879480  | -3.002466897175 | -0.998953447403 |
| C | 3.756186084189  | -1.797794083309 | -1.400186311526 |
| C | 4.465840783468  | -0.595441125684 | -1.135662305020 |
| N | 4.706535844926  | 1.756762276328  | -1.276860770339 |
| C | 5.921021624096  | 1.742368792987  | -0.655448268066 |
| C | 6.445800974168  | 0.552439875080  | -0.241173716857 |
| H | -1.662813441515 | 1.886129956101  | -1.787215944949 |
| H | -1.728117454325 | 0.198097242694  | -2.069267805847 |
| H | 2.251294289584  | 0.463285030466  | 0.392566773981  |
| H | 0.126837875597  | 0.367705836407  | 1.593786972817  |
| H | -2.008647671155 | 0.674201630088  | 0.358412410349  |
| H | -0.622428696924 | 1.449791324423  | -4.242514685657 |
| H | 1.570896496849  | 1.565905298170  | -5.376665223261 |
| H | 3.669214335024  | 1.199523644956  | -4.125178313766 |
| H | 7.202857502106  | -1.956709865839 | 0.439005708119  |
| H | 5.922507116523  | -4.021918457647 | -0.018076172316 |
| H | 3.741541746228  | -3.922100096187 | -1.202065412727 |
| H | 2.808290098188  | -1.762573047016 | -1.927384744278 |
| H | 4.331997711339  | 2.659005448282  | -1.562440860725 |
| H | 6.399588872928  | 2.703985279956  | -0.523492342056 |
| H | 7.409000515398  | 0.537814220308  | 0.257393143038  |

### 8a-TS-ring\_closure.xyz

35

SCF=-787.147084140 ; NI=1 ; Neg-freq =-360.0735

|   |                 |                 |                 |
|---|-----------------|-----------------|-----------------|
| C | 0.002169703580  | 0.010970534636  | 0.000966875298  |
| C | -0.000310694379 | 0.006320245168  | 1.458630012230  |
| C | 1.214735971016  | 0.009263381641  | 2.179984421770  |
| C | 2.441873948923  | -0.050880527479 | 1.451097735788  |
| C | 2.457058097562  | -0.122348969552 | 0.070082721506  |
| C | 1.259448287375  | -0.040068502685 | -0.649119658443 |
| C | 1.177818485541  | 0.033780902498  | 3.594734151641  |
| C | -0.033196835873 | -0.009727222508 | 4.229206790065  |
| N | -1.173744155408 | -0.130568072150 | 3.498501783323  |
| C | -1.217374086474 | -0.146865036760 | 2.156202984939  |
| C | -2.466583055158 | -0.382053036833 | 1.439132666090  |
| C | -2.383566488323 | -1.024722393889 | 0.173379788675  |
| C | -3.532963840626 | -1.141551425554 | -0.619284099732 |
| C | -4.760159682744 | -0.701364198279 | -0.104084226785 |
| C | -4.846430741114 | -0.119000746554 | 1.155013983538  |
| C | -3.697185782237 | 0.060069341309  | 1.925107653847  |
| C | -3.468353188134 | -1.722947139837 | -2.001251235194 |
| C | -2.106825442489 | -2.084003712936 | -2.464925852583 |
| C | -1.003888662622 | -1.986790754693 | -1.696397587970 |
| C | -1.080918736733 | -1.531889028352 | -0.318095414528 |
| H | 3.376229115243  | -0.055367520309 | 2.005325740967  |
| H | 3.403055139944  | -0.178903493417 | -0.458166574771 |
| H | 1.288147117811  | 0.024375064071  | -1.733079532975 |
| H | -0.721692511084 | 0.659003990373  | -0.493395509920 |
| H | 2.091187367872  | 0.065818944650  | 4.177337847205  |
| H | -0.156772965100 | 0.004087099819  | 5.304208586947  |
| H | -0.531319621121 | -2.166067176263 | 0.377554154588  |
| H | -0.044978872748 | -2.340511655975 | -2.063235741092 |

|   |                 |                 |                 |
|---|-----------------|-----------------|-----------------|
| H | -2.024250197124 | -2.511091457097 | -3.461615075945 |
| H | -3.923338170452 | -1.020345525438 | -2.716670163736 |
| H | -5.655287739120 | -0.805027900133 | -0.712150098261 |
| H | -5.803822236470 | 0.231075009796  | 1.528421891932  |
| H | -3.769471346991 | 0.592196015198  | 2.869772601652  |
| H | -4.106438113553 | -2.618664837481 | -2.064073779840 |
| H | -2.042597070185 | -0.266365784294 | 4.010773786745  |

### Intermediary\_for\_ring\_closure\_from\_8a\_Table\_3.xyz

35

-787.151580243

|   |                 |                 |                 |
|---|-----------------|-----------------|-----------------|
| C | 0.025399252257  | 0.024229325200  | -0.015521698271 |
| C | 0.003668479846  | -0.023091715112 | 1.585110114038  |
| C | 1.398596354371  | -0.017663039815 | 2.075809558669  |
| C | 2.358889287718  | -0.775057134747 | 1.376118799546  |
| C | 1.993751542200  | -1.548797553524 | 0.201137310155  |
| C | 0.801926932920  | -1.188582173744 | -0.479572098480 |
| C | 1.788712682969  | 0.752107326656  | 3.183925539902  |
| C | 0.804423205755  | 1.581515658186  | 3.815385336379  |
| C | -0.504236856643 | 1.656455791948  | 3.359270597742  |
| C | -0.898547510549 | 0.888355834485  | 2.273366704645  |
| N | 3.621806697285  | -0.743976646942 | 1.845237343664  |
| C | 4.027020600177  | -0.054010357511 | 2.939238783295  |
| C | 3.128341669688  | 0.715302883330  | 3.632154933141  |
| C | 0.379158880955  | -1.955918825187 | -1.568594413244 |
| C | 1.164579855043  | -3.040873189197 | -1.982192299214 |
| C | 2.345042613269  | -3.380693728453 | -1.326848304304 |
| C | 2.759425409925  | -2.641781819264 | -0.226198997632 |
| C | -1.323990570842 | 0.164003251630  | -0.643154965636 |
| C | -1.724836327749 | -0.580415198960 | -1.678110686200 |
| C | -0.902649628965 | -1.657360610966 | -2.301320178815 |
| H | 1.105405421862  | 2.174038098129  | 4.675410571095  |
| H | -1.218197566708 | 2.298435176789  | 3.863408519368  |
| H | -1.937368419135 | 0.910765477085  | 1.956657880858  |
| H | -0.441695918605 | -1.020237885522 | 1.795458924252  |
| H | 3.452949633293  | 1.290244110298  | 4.491412323976  |
| H | 5.075451679789  | -0.138543539690 | 3.194957343555  |
| H | 0.606495807284  | 0.932208366766  | -0.236321207913 |
| H | -1.958031726937 | 0.972564628170  | -0.289033835043 |
| H | -2.693307206031 | -0.380300247780 | -2.131755007630 |
| H | -1.498004096618 | -2.577746235979 | -2.383662369310 |
| H | 0.832421036583  | -3.635576698398 | -2.830016727392 |
| H | 2.928415182647  | -4.234533904448 | -1.657290263898 |
| H | 3.648447835532  | -2.955445321279 | 0.313405237393  |
| H | -0.676433183879 | -1.376561007319 | -3.341481171167 |
| H | 4.336638581434  | -1.255243779418 | 1.332213070535  |

### 9a.xyz

34

-786.799874048

|   |                 |                 |                |
|---|-----------------|-----------------|----------------|
| C | -0.032222136795 | -0.079722402438 | 0.056074592112 |
| C | -0.006772786597 | -0.024219666133 | 1.457126645818 |

|   |                 |                 |                 |
|---|-----------------|-----------------|-----------------|
| C | 1.273327413476  | -0.002269993630 | 2.103514148265  |
| C | 2.441053871307  | -0.060254366600 | 1.298323855277  |
| C | 2.340138084552  | -0.124636759956 | -0.061317286133 |
| N | 1.101080068245  | -0.128364960097 | -0.637157210717 |
| C | -1.213071886822 | 0.029579925807  | 2.226769901404  |
| C | -1.099232299649 | 0.125071973262  | 3.599042482122  |
| C | 0.163386264655  | 0.152842572034  | 4.238031523044  |
| C | 1.331776884722  | 0.084751376473  | 3.512885028655  |
| C | -2.552191260395 | 0.011972842257  | 1.572017597520  |
| C | -3.106323237368 | -1.205488362668 | 1.059395276567  |
| C | -4.394406832421 | -1.164337530296 | 0.432109636420  |
| C | -5.090749666333 | 0.069936647918  | 0.345991440836  |
| C | -4.543886821440 | 1.221308715822  | 0.862843467127  |
| C | -3.271221848008 | 1.189255155815  | 1.477373478666  |
| C | -4.951560465349 | -2.365532945215 | -0.082651992597 |
| C | -4.276656670553 | -3.560903103915 | 0.022109943240  |
| C | -3.011821955309 | -3.605860378486 | 0.654405397045  |
| C | -2.441648269114 | -2.458249554736 | 1.160720176090  |
| H | 2.298703569937  | 0.100648544969  | 4.007295651076  |
| H | 0.203127983607  | 0.224339402952  | 5.321362556910  |
| H | -2.000474462966 | 0.169824664432  | 4.203907374950  |
| H | 3.422733885714  | -0.051115847311 | 1.759672342664  |
| H | -0.952922364478 | -0.080696034104 | -0.514994774497 |
| H | 3.183926454009  | -0.170417944312 | -0.737082575548 |
| H | -2.845079248503 | 2.108211180895  | 1.872540578258  |
| H | -5.081920190664 | 2.163334125408  | 0.798766220534  |
| H | -6.067501485592 | 0.089273396214  | -0.132466299276 |
| H | -5.928181247448 | -2.323766226228 | -0.560239530513 |
| H | -4.715028640760 | -4.473076342710 | -0.374505778966 |
| H | -2.487915820866 | -4.554130065033 | 0.744148573191  |
| H | -1.474459619477 | -2.513255924133 | 1.653113052553  |
| H | 1.043616105253  | -0.166793999467 | -1.651445208764 |

### 9a-sigma-5'.xyz

35

-787.187535868

|   |                 |                 |                 |
|---|-----------------|-----------------|-----------------|
| C | 0.186155235160  | 0.272106729131  | -0.016387381502 |
| C | 0.125278563714  | 0.053694839376  | 1.376844858228  |
| C | 1.344222162095  | 0.070981611747  | 2.119384840176  |
| C | 2.623981611775  | 0.366286123719  | 1.419306498438  |
| C | 2.557194039072  | 0.609212403862  | -0.024110138547 |
| C | 1.374234152868  | 0.552355665846  | -0.712656149301 |
| C | 1.322180629178  | -0.197958787623 | 3.486645486208  |
| C | 0.116064492796  | -0.482052348137 | 4.113943715129  |
| C | -1.093602836925 | -0.493260637899 | 3.398157094469  |
| C | -1.115152292863 | -0.218421752819 | 2.040712557044  |
| C | -2.414706654631 | -0.166362850087 | 1.316621406048  |
| C | -3.186174822250 | -1.349856303164 | 1.083065232783  |
| C | -4.465149205063 | -1.258781774691 | 0.440869825193  |
| C | -4.947895137673 | 0.006874540548  | 0.034959669471  |
| C | -4.184936204989 | 1.130227040152  | 0.253663403140  |
| C | -2.924265369700 | 1.044015185157  | 0.890377132780  |
| C | -5.204839892140 | -2.450301335031 | 0.226638703874  |

|   |                 |                 |                 |
|---|-----------------|-----------------|-----------------|
| C | -4.697176540749 | -3.656664468070 | 0.614365963035  |
| N | -3.466926700116 | -3.700711120642 | 1.204744977563  |
| C | -2.722586509859 | -2.625168946099 | 1.439957899062  |
| H | -5.917812523224 | 0.076917096407  | -0.448263277715 |
| H | -4.550902727053 | 2.104372476846  | -0.057080474831 |
| H | -2.359219956525 | 1.955006784807  | 1.066521061682  |
| H | -6.178231528898 | -2.409730443950 | -0.250157958467 |
| H | -1.760767506823 | -2.796773168168 | 1.907599389863  |
| H | -5.202088079737 | -4.604601222050 | 0.482741399089  |
| H | -2.022261559965 | -0.694181690317 | 3.924460537941  |
| H | 0.100749785620  | -0.689586169730 | 5.180055039822  |
| H | 2.246474056194  | -0.187238032898 | 4.057249715682  |
| H | 3.352075103710  | -0.446961152587 | 1.594074661048  |
| H | 3.487453292022  | 0.830031376753  | -0.540920488281 |
| H | 1.339805050019  | 0.716593544707  | -1.784187622170 |
| H | -0.736212484827 | 0.217283180325  | -0.588688827994 |
| H | 3.130815972520  | 1.226423514467  | 1.893244138857  |
| H | -3.097294054148 | -4.607818744150 | 1.477726652212  |

### 9a-TS-ring\_closure.xyz

35

SCF=-787.127103672 ; NI=1 ; Neg-freq =-261.6618

|   |                 |                 |                 |
|---|-----------------|-----------------|-----------------|
| C | 0.040254775545  | 0.005922548065  | -0.005454078271 |
| C | 0.014089453139  | 0.022767968009  | 1.725524627746  |
| C | 1.474646019991  | 0.003804999681  | 2.050446138655  |
| C | 2.317228913798  | -0.912634653930 | 1.375946426381  |
| C | 1.721002772489  | -1.770358554652 | 0.334200231316  |
| C | 0.571144593109  | -1.318613021453 | -0.330016438579 |
| C | 2.016071298825  | 0.914470701039  | 2.969388289104  |
| C | 1.164777922048  | 1.963759985554  | 3.621637507828  |
| C | -0.244201117809 | 2.006816617344  | 3.161359535504  |
| C | -0.772936785711 | 1.128653093915  | 2.288338895882  |
| C | 3.675768747227  | -0.952342773617 | 1.679929243907  |
| C | 4.203854224429  | -0.082513533407 | 2.639631885510  |
| C | 3.384673940507  | 0.845082554726  | 3.268525304293  |
| C | -0.142462316008 | -2.189571701103 | -1.232755730084 |
| C | 0.406459053808  | -3.459967908312 | -1.570628844009 |
| C | 1.581838114990  | -3.850649260808 | -0.981466919552 |
| C | 2.214002457519  | -3.028511579876 | -0.017843955680 |
| N | -1.192078949794 | 0.319745683754  | -0.603519764297 |
| C | -1.898218949684 | -0.499868091596 | -1.346977465999 |
| C | -1.381686304436 | -1.772117613220 | -1.698471698009 |
| H | -0.129168017252 | -4.105884612113 | -2.258144128602 |
| H | 2.016167830935  | -4.818000069944 | -1.211293936855 |
| H | 3.100888497240  | -3.410462374346 | 0.479157137211  |
| H | -1.980413396777 | -2.404825249857 | -2.345809701803 |
| H | 0.740143563257  | 0.828561578284  | -0.180383818179 |
| H | -2.856400638602 | -0.147022512335 | -1.710960490264 |
| H | 4.338085008401  | -1.633996793242 | 1.154731592121  |
| H | 5.264831236535  | -0.115841243523 | 2.869502911090  |
| H | 3.806989932125  | 1.543732921578  | 3.986654166304  |
| H | 1.627094377285  | 2.953609534915  | 3.480289570768  |
| H | -0.888404771160 | 2.756576616550  | 3.614973015085  |

|   |                 |                 |                 |
|---|-----------------|-----------------|-----------------|
| H | -1.835709859516 | 1.163169787677  | 2.061530596609  |
| H | -0.482007914292 | -0.936540151210 | 1.909271485594  |
| H | 1.167696584859  | 1.826678998505  | 4.715520142254  |
| H | -1.545823460066 | 1.266762922533  | -0.467144352228 |

**Intermediary\_for\_ring\_closure\_from\_9a\_Table\_3.xyz**

35

-787.127577277

|   |                 |                 |                 |
|---|-----------------|-----------------|-----------------|
| C | 0.076721423814  | 0.040436332351  | -0.043291759898 |
| C | 0.018519779360  | -0.046840326703 | 1.576454139358  |
| C | 1.468616226032  | -0.015873937584 | 2.002442678861  |
| C | 2.406836456155  | -0.796411791144 | 1.289085973826  |
| C | 1.930332338192  | -1.576008016932 | 0.132288668415  |
| C | 0.764061756790  | -1.176203394635 | -0.518928005189 |
| C | 1.892087439305  | 0.779438400214  | 3.073556086883  |
| C | 0.942453731656  | 1.681136470520  | 3.810492490186  |
| C | -0.423848552846 | 1.750959916650  | 3.228123683906  |
| C | -0.842596160037 | 0.986113330521  | 2.209445760850  |
| C | 3.747407802393  | -0.802803489533 | 1.678365673745  |
| C | 4.161029617104  | -0.037146157571 | 2.770211466216  |
| C | 3.242883933106  | 0.748320224432  | 3.453706793916  |
| C | 0.197154545085  | -1.988101250380 | -1.570104187478 |
| C | 0.894530686205  | -3.149154555148 | -2.034260405130 |
| C | 2.071564723564  | -3.496502137669 | -1.425871999801 |
| C | 2.565607351732  | -2.734821388442 | -0.340428488428 |
| N | -1.192647234586 | 0.265291602060  | -0.657276635711 |
| C | -1.741318134131 | -0.500144084913 | -1.555293306289 |
| C | -1.049242127571 | -1.649627993735 | -2.055637172101 |
| H | 0.464733304232  | -3.744597713533 | -2.832926573917 |
| H | 2.618128920528  | -4.378748014249 | -1.741299885693 |
| H | 3.465452583791  | -3.083777929816 | 0.157075511616  |
| H | -1.541808775948 | -2.241513152012 | -2.820512921891 |
| H | 0.683905143638  | 0.939935581457  | -0.230011873432 |
| H | -2.719743363135 | -0.219102075042 | -1.929949322452 |
| H | 4.481499191520  | -1.379874639963 | 1.124181912033  |
| H | 5.205439818780  | -0.041644416483 | 3.068221038095  |
| H | 3.571426406386  | 1.367158755130  | 4.285404850703  |
| H | 1.371058033559  | 2.692753305279  | 3.871688407368  |
| H | -1.126661494692 | 2.432406442210  | 3.702544692706  |
| H | -1.883085070138 | 1.039754385798  | 1.896959292622  |
| H | -0.421528005036 | -1.038518015690 | 1.754566699630  |
| H | 0.859656470504  | 1.358746443419  | 4.861130963521  |
| H | -1.686854810181 | 1.116988776463  | -0.390759950617 |

**25.xyz**

50

-1154.87976326

|   |                |                |                 |
|---|----------------|----------------|-----------------|
| C | 2.564858655928 | 1.754381628561 | -0.469488469467 |
| C | 2.615333008772 | 2.557992311394 | -1.640932908284 |
| C | 1.754153076080 | 2.341634457834 | -2.693348304482 |
| C | 0.793711655648 | 1.306943915687 | -2.622778480719 |
| C | 0.722326763727 | 0.504611770828 | -1.506034476657 |



|   |                 |                 |                 |
|---|-----------------|-----------------|-----------------|
| C | 1.602180862296  | 0.692258447896  | -0.405357411906 |
| C | 1.543406670798  | -0.140481124321 | 0.758108095001  |
| C | 2.415198972646  | 0.104461134139  | 1.800436036504  |
| C | 3.360813679235  | 1.151142762995  | 1.738279436188  |
| C | 3.448567007245  | 1.976450297446  | 0.635067135626  |
| C | 4.470244923984  | 3.065057693556  | 0.609755496838  |
| C | 0.541099152643  | -1.240336077827 | 0.879912963598  |
| C | 0.726400813025  | -2.495342629131 | 0.214144008528  |
| C | 1.863827518505  | -2.771959443000 | -0.591939523160 |
| C | 2.013587632655  | -3.991472160142 | -1.215261081690 |
| C | 1.031978330895  | -4.999544050755 | -1.063897240120 |
| C | -0.078886670017 | -4.766586977972 | -0.284930894060 |
| C | -0.262204395288 | -3.520913658055 | 0.373677307953  |
| C | -1.397784231603 | -3.275445215778 | 1.189771318215  |
| C | -1.548806535488 | -2.067430955435 | 1.829728243691  |
| C | -0.576126744572 | -1.052791065508 | 1.672869209915  |
| C | 5.131131011987  | 5.431305290715  | 0.869125940808  |
| C | 4.776919533889  | 6.779026116279  | 1.147141303850  |
| C | 3.475597991590  | 7.125012005919  | 1.433635610845  |
| C | 2.468271177343  | 6.131394273311  | 1.456514332401  |
| C | 2.778939633394  | 4.816100499173  | 1.189069439397  |
| C | 4.111096843192  | 4.424552540258  | 0.885031562168  |
| C | 5.791382073157  | 2.752982480924  | 0.347474119256  |
| C | 6.795605341893  | 3.748865274656  | 0.332377996446  |
| C | 6.472259477338  | 5.061644294277  | 0.584805466214  |
| H | 3.350874650800  | 3.355728447523  | -1.697274839383 |
| H | 1.810866431201  | 2.968792929149  | -3.579725116671 |
| H | 0.110848313541  | 1.144281718370  | -3.453095097512 |
| H | -0.017970609845 | -0.289126451531 | -1.456803504971 |
| H | 2.376711448790  | -0.523611481319 | 2.687482784563  |
| H | 4.027975400226  | 1.313724623634  | 2.581624401235  |
| H | 2.624365396636  | -2.005109656131 | -0.711406288907 |
| H | 2.892052449201  | -4.182626479894 | -1.826870027403 |
| H | 1.160132909282  | -5.957931337154 | -1.561074451066 |
| H | -0.835306088547 | -5.538864232989 | -0.159531820883 |
| H | -2.143460307083 | -4.059638177503 | 1.303292926720  |
| H | -2.417252716398 | -1.882946233958 | 2.457280516426  |
| H | -0.712759356222 | -0.100084712622 | 2.179431645997  |
| H | 5.557692069136  | 7.536939854253  | 1.132287375370  |
| H | 3.218965137182  | 8.160037078087  | 1.645768723665  |
| H | 1.442814529826  | 6.409258314938  | 1.687952360463  |
| H | 1.999062373587  | 4.059829796163  | 1.212260460166  |
| H | 6.061225406155  | 1.719670465776  | 0.141602427077  |
| H | 7.823844585596  | 3.467821825784  | 0.118355765279  |
| H | 7.239587656325  | 5.833027585599  | 0.573527347877  |

## 25a-Sigma-5.xyz

51

-1155.27187505

|   |                |                 |                |
|---|----------------|-----------------|----------------|
| C | 0.092400673381 | -0.144358255259 | 0.103119899835 |
| C | 0.091253705660 | 0.413785686494  | 1.422822059412 |
| C | 1.252415291305 | 0.970591681276  | 1.926614834889 |
| C | 2.449788117522 | 0.983212952942  | 1.173883526072 |

|   |                 |                 |                 |
|---|-----------------|-----------------|-----------------|
| C | 2.479177317614  | 0.438912026774  | -0.089010950516 |
| C | 1.308445558762  | -0.131271642377 | -0.655443811962 |
| C | 1.313243658774  | -0.682365128963 | -1.965325073736 |
| C | 0.169015210655  | -1.217910858189 | -2.512685266153 |
| C | -1.035615481520 | -1.220767000532 | -1.769962779168 |
| C | -1.072192193582 | -0.697533514616 | -0.495809797426 |
| H | -2.004438393473 | -0.701342319354 | 0.062446174579  |
| H | -1.938414272552 | -1.637370042190 | -2.209913969413 |
| H | 0.186091752674  | -1.634904134106 | -3.516536564536 |
| H | 2.241922185506  | -0.669854513118 | -2.532209244751 |
| H | 3.397564940978  | 0.442313031618  | -0.672342350861 |
| H | 3.346043383599  | 1.423386636099  | 1.603682436510  |
| H | 1.246549698611  | 1.397793769288  | 2.926743805082  |
| C | -1.149572274815 | 0.433883552491  | 2.251246194185  |
| C | -1.836053936918 | 1.620704937008  | 2.415767715688  |
| C | -3.017964636403 | 1.682859936608  | 3.180932400858  |
| C | -3.536820773480 | 0.555874418190  | 3.794829947386  |
| C | -2.834122914190 | -0.688998429595 | 3.685961807096  |
| C | -1.631692220695 | -0.746411756598 | 2.905175100804  |
| C | -0.930846568698 | -1.979412997764 | 2.823759895785  |
| C | -1.383239378783 | -3.103652858770 | 3.478016521464  |
| C | -2.559237458589 | -3.043615224200 | 4.257589406354  |
| C | -3.262594619488 | -1.863652910298 | 4.361229108715  |
| H | -4.154209686371 | -1.825981671305 | 4.979994502992  |
| H | -2.905523751500 | -3.928291614840 | 4.785723329399  |
| H | -0.829080415690 | -4.035824931215 | 3.403834413098  |
| H | -0.015691606392 | -2.024382301376 | 2.240349351634  |
| C | -4.838922923318 | 0.659211234251  | 4.498041017704  |
| C | -5.944656026540 | -0.040172711942 | 4.033005031306  |
| C | -7.205441881727 | 0.131541951473  | 4.621017915853  |
| C | -7.395564608036 | 1.005344300400  | 5.688784679097  |
| C | -6.313780165005 | 1.712202068017  | 6.201480880682  |
| C | -5.016945861491 | 1.527811243333  | 5.626865104280  |
| C | -3.919505037115 | 2.164359123209  | 6.238364370991  |
| C | -4.033394459478 | 3.038826558544  | 7.337047089499  |
| C | -5.267724706498 | 3.289056423231  | 7.869728400257  |
| C | -6.481816350652 | 2.650684837608  | 7.347430577234  |
| H | -7.197581130616 | 3.449935532493  | 7.080378499765  |
| H | -6.997731126371 | 2.149702800074  | 8.185128142178  |
| H | -5.379900037385 | 3.970587844968  | 8.708956102117  |
| H | -3.140973524579 | 3.498609901257  | 7.748004800045  |
| H | -2.926037887856 | 1.962613194017  | 5.846716712670  |
| H | -8.384346867936 | 1.133818910904  | 6.120235425685  |
| H | -8.054514629849 | -0.416331306341 | 4.221562476570  |
| H | -5.839339871722 | -0.702724160452 | 3.178974623167  |
| H | -3.551200539625 | 2.628018997341  | 3.249112271471  |
| H | -1.474753344646 | 2.522278344830  | 1.927848459419  |

## 25a-TS1\_from\_Sigma-5.xyz

51

SCF=-1155.24565251 ; NI=1 ; Neg-freq =-376.4118

|   |                 |                |                 |
|---|-----------------|----------------|-----------------|
| C | -3.059188288578 | 1.061153904290 | -0.625007092658 |
| C | -1.600272956036 | 1.173621849170 | 0.806944132774  |

|   |                 |                 |                 |
|---|-----------------|-----------------|-----------------|
| C | -0.773797048841 | 0.106433842913  | 0.264045579781  |
| C | -1.343149474750 | -1.150312794547 | -0.069797283065 |
| C | -2.804700684535 | -1.328479997666 | 0.056764352840  |
| C | -3.648524517252 | -0.212594299363 | -0.186802583847 |
| C | -0.509324996656 | -2.139651692092 | -0.572281384400 |
| C | 0.864189969443  | -1.911213916016 | -0.766512097169 |
| C | 1.432648922876  | -0.669882796193 | -0.535683742256 |
| C | 0.589442529049  | 0.379200053432  | -0.049972148533 |
| C | -1.067939143549 | 2.474300047357  | 0.918880124293  |
| C | 0.226319849513  | 2.755721952805  | 0.485315617039  |
| C | 1.044746210910  | 1.720850995639  | 0.052808977684  |
| C | -5.030579829823 | -0.301671721727 | 0.045477472065  |
| C | -5.578831106067 | -1.535083312862 | 0.423813115385  |
| C | -4.761999099419 | -2.642861271189 | 0.609774494319  |
| C | -3.375570744151 | -2.535818921241 | 0.448164182953  |
| C | -3.885749681373 | 2.244722814546  | -0.650105058040 |
| C | -5.213242970901 | 2.168226330919  | -0.413305359613 |
| C | -5.916267268270 | 0.901512808588  | -0.097281491591 |
| C | 2.869581557622  | -0.441636988859 | -0.854793846099 |
| C | 3.838555935032  | -0.217863288258 | 0.178117066004  |
| C | 5.208068445176  | -0.012564445757 | -0.192481335483 |
| C | 5.574841008115  | -0.045653553733 | -1.563717891885 |
| C | 4.630106637618  | -0.281906036590 | -2.535080323520 |
| C | 3.277736949704  | -0.482104894767 | -2.176134592794 |
| C | 3.505638104071  | -0.214814620603 | 1.560382697169  |
| C | 4.468402334185  | -0.001147900962 | 2.522727501093  |
| C | 5.816418405549  | 0.218496479539  | 2.153639379067  |
| C | 6.175198709214  | 0.208870731639  | 0.824616186478  |
| H | 2.067352005126  | 1.942322837989  | -0.239706570878 |
| H | 0.614933306987  | 3.768103128325  | 0.535184248476  |
| H | -1.674251496318 | 3.254964762303  | 1.370165739740  |
| H | -2.363291638405 | 0.911832168816  | 1.535356696156  |
| H | -0.925072304478 | -3.103919502232 | -0.852207346170 |
| H | 1.485171946525  | -2.718355657255 | -1.145613605051 |
| H | -2.302464481533 | 1.011675924182  | -1.404587614693 |
| H | -3.431290566242 | 3.183807337802  | -0.951768330171 |
| H | -5.827281412254 | 3.059941908462  | -0.518536288517 |
| H | -6.506496078013 | 1.035200709939  | 0.823187804838  |
| H | -6.650645855892 | -1.613549497038 | 0.589650240198  |
| H | -5.195769088649 | -3.591554352955 | 0.913941269508  |
| H | -2.741825608949 | -3.392451231201 | 0.660403756426  |
| H | 7.211094183202  | 0.367679040518  | 0.532370684606  |
| H | 6.566576646395  | 0.387750755447  | 2.921958731055  |
| H | 4.191634866914  | -0.005248579687 | 3.574089528991  |
| H | 2.476934945940  | -0.391938432936 | 1.861675573401  |
| H | 2.539699157557  | -0.656894505316 | -2.955359907959 |
| H | 4.914362044894  | -0.311361429414 | -3.583751872872 |
| H | 6.616802474894  | 0.114014292274  | -1.832669295703 |
| H | -6.678274805581 | 0.725525963564  | -0.874100089371 |

**Intermediary\_for\_the\_formation\_of\_26\_from\_Sigma5\_ring\_closure-1.xyz**

51

-1155.26001795

|   |                 |                 |                 |
|---|-----------------|-----------------|-----------------|
| C | 0.052654401086  | 0.033596296033  | -0.036953562940 |
| C | 0.001849888732  | -0.023010872272 | 1.541493602921  |
| C | 1.398412324577  | -0.022219010040 | 2.064090792641  |
| C | 2.367975943704  | -0.779119675746 | 1.392981603149  |
| C | 1.971676466613  | -1.573594958330 | 0.215578301697  |
| C | 0.814017490380  | -1.194627827045 | -0.500839557968 |
| C | 3.680018597146  | -0.733259650730 | 1.879100240418  |
| C | 4.028272652195  | 0.001116365203  | 3.019559195207  |
| C | 3.087346025891  | 0.747113312920  | 3.712520542191  |
| C | 1.748273470702  | 0.759331294574  | 3.203077684174  |
| C | -0.923719575083 | 0.907654609046  | 2.201222565498  |
| C | -0.553697244914 | 1.672982765762  | 3.274079788670  |
| C | 0.762915104241  | 1.595035776274  | 3.762754748575  |
| C | 0.398913692346  | -1.948975131927 | -1.604232108171 |
| C | 1.151594760974  | -3.066774185056 | -1.990623096186 |
| C | 2.295493729293  | -3.438570767991 | -1.292226390029 |
| C | 2.702086281927  | -2.697389952590 | -0.184924584179 |
| C | -1.283764370818 | 0.194552617716  | -0.696745667400 |
| C | -1.673262618824 | -0.527540040745 | -1.751481054527 |
| C | -0.848020453561 | -1.602862786684 | -2.378473304157 |
| C | 3.490090057051  | 1.534969173574  | 4.908054806085  |
| C | 3.066633433521  | 1.160447938689  | 6.225431745178  |
| C | 3.493051108824  | 1.959938061607  | 7.336320602563  |
| C | 4.327316976427  | 3.085821438317  | 7.109326185936  |
| C | 4.738169461908  | 3.409631505029  | 5.837146679588  |
| C | 4.320282165917  | 2.628393905023  | 4.736487119275  |
| C | 2.264743823395  | 0.015347788846  | 6.484644870807  |
| C | 1.886716734836  | -0.309586742922 | 7.769216251514  |
| C | 2.291757055532  | 0.492056067263  | 8.862163456678  |
| C | 3.080723664543  | 1.599433433469  | 8.647157286004  |
| H | 1.037140606309  | 2.221375797574  | 4.607973902692  |
| H | -1.264536913913 | 2.335545688190  | 3.756519510507  |
| H | -1.951156401635 | 0.937288196072  | 1.850436443383  |
| H | -0.434940383206 | -1.022332712169 | 1.758803959199  |
| H | 4.464395808909  | -1.274575507843 | 1.358039955522  |
| H | 5.057668503932  | -0.015110616431 | 3.365462378332  |
| H | 0.651384615329  | 0.931465286757  | -0.262484792135 |
| H | -1.923008045299 | 0.999439799395  | -0.341664134847 |
| H | -2.633713497910 | -0.313272090090 | -2.217261568530 |
| H | -1.457693152676 | -2.507527515269 | -2.514933439695 |
| H | 0.822306262900  | -3.656093750331 | -2.844124423931 |
| H | 2.862182906204  | -4.314232897220 | -1.597398113425 |
| H | 3.575446553519  | -3.014279919632 | 0.378042036708  |
| H | 3.406070775419  | 2.215142288515  | 9.482990748082  |
| H | 1.984347569826  | 0.226484896153  | 9.870354540291  |
| H | 1.275408739272  | -1.191143537354 | 7.944961150047  |
| H | 1.953605803664  | -0.620147041108 | 5.660083104238  |
| H | 4.643175086900  | 2.901270699866  | 3.734776111228  |
| H | 5.380944263593  | 4.269354750408  | 5.667998522695  |
| H | 4.641936104851  | 3.685714167516  | 7.960486432693  |
| H | -0.576262220192 | -1.293262326109 | -3.400235077938 |

25a-TS2\_from\_Sigma-5.xyz

51

SCF=-1155.23467390 ; NI=1 ; Neg-freq =-374.9025

|   |                 |                 |                 |
|---|-----------------|-----------------|-----------------|
| C | -2.731531531853 | 1.048114294453  | -0.730138569354 |
| C | -1.436081289732 | 1.187398945857  | 0.137725890936  |
| C | -0.660048936176 | -0.093849712730 | 0.021547984026  |
| C | -1.371640185187 | -1.307845115732 | 0.128378175652  |
| C | -2.839079853956 | -1.259127711696 | 0.280731415262  |
| C | -3.534591217552 | -0.103633778882 | -0.149172191142 |
| C | -0.650497053407 | -2.505326103777 | 0.083703935373  |
| C | 0.741835890743  | -2.511914628348 | -0.015850312483 |
| C | 1.451254606312  | -1.322596378853 | -0.157429109551 |
| C | 0.722560935676  | -0.106657632858 | -0.199389342630 |
| C | -0.622687616126 | 2.409469086901  | -0.085407452028 |
| C | 0.707284104636  | 2.395655550666  | -0.324570093043 |
| C | 1.428302659090  | 1.154517564889  | -0.449027748791 |
| C | -4.927469180574 | -0.038649985662 | -0.015184978531 |
| C | -5.616116471520 | -1.126460034462 | 0.538125797654  |
| C | -4.936881888658 | -2.264336533748 | 0.962079690470  |
| C | -3.551256241343 | -2.327913568393 | 0.839806668164  |
| C | -3.528972822612 | 2.312253527670  | -0.872036606800 |
| C | -4.858564659136 | 2.366093043563  | -0.754081035070 |
| C | -5.711181660968 | 1.180518067952  | -0.436810869515 |
| C | 2.925185089653  | -1.268559026819 | -0.230289581556 |
| C | 3.592528187148  | -0.134442327310 | 0.308390920764  |
| C | 4.982399866199  | 0.047915722395  | 0.054682656905  |
| C | 5.717759593207  | -0.979424143701 | -0.588117900678 |
| C | 5.074542914636  | -2.122316181575 | -1.012130044346 |
| C | 3.679789884116  | -2.249029890338 | -0.864779952434 |
| C | 2.866307541415  | 0.912650564449  | 1.008993398173  |
| C | 3.528277602797  | 2.114197461099  | 1.334815966828  |
| C | 4.863752147898  | 2.319400805931  | 0.985766467904  |
| C | 5.584043384222  | 1.286651955361  | 0.401576092317  |
| H | 2.200576816158  | 1.142371189940  | -1.213966854996 |
| H | 1.242114705614  | 3.323139136640  | -0.506856055589 |
| H | -1.134467109401 | 3.367337319366  | -0.045564433806 |
| H | -1.797713695286 | 1.260934420064  | 1.182190356838  |
| H | -1.170802171674 | -3.456711950286 | 0.140968510806  |
| H | 1.271050223943  | -3.459785647670 | 0.027448984193  |
| H | -2.380213349987 | 0.761932732220  | -1.737081128128 |
| H | -2.988838229198 | 3.211726442739  | -1.158435146028 |
| H | -5.373451700033 | 3.310652006672  | -0.923190721542 |
| H | -6.434763748670 | 1.440265492448  | 0.348779855224  |
| H | -6.697512596907 | -1.068397751217 | 0.646751957444  |
| H | -5.482357350507 | -3.095410492674 | 1.401778651696  |
| H | -3.024419990954 | -3.205534135540 | 1.203401426997  |
| H | 6.640203259649  | 1.426074375292  | 0.182188941533  |
| H | 5.353942560744  | 3.258612017750  | 1.222369192766  |
| H | 2.991672151868  | 2.873039990718  | 1.897756873969  |
| H | 2.056726459350  | 0.627388801214  | 1.675422743816  |
| H | 3.181659890641  | -3.114206935795 | -1.293946022915 |
| H | 5.630922584117  | -2.910023878357 | -1.511997888080 |
| H | 6.780751305419  | -0.839798972734 | -0.765596463599 |
| H | -6.329233813833 | 0.937242002912  | -1.316258053073 |

**Intermediary\_for\_the\_formation\_of\_26\_from\_Sigma5\_ring\_closure-2.xyz**

-1155.25034441

|   |                 |                 |                 |
|---|-----------------|-----------------|-----------------|
| C | -2.724734285161 | 1.072255101115  | -0.638782009266 |
| C | -1.467933745135 | 1.177892288271  | 0.276751472754  |
| C | -0.663157715004 | -0.087178860989 | 0.093824680739  |
| C | -1.369479164090 | -1.309292093962 | 0.133588792934  |
| C | -2.840755299005 | -1.277098382953 | 0.259371021050  |
| C | -3.536961900391 | -0.112305020284 | -0.143887843965 |
| C | -0.651787743064 | -2.508186469685 | 0.038007468731  |
| C | 0.733107494675  | -2.503197088306 | -0.068737791828 |
| C | 1.436291937279  | -1.296187942261 | -0.147363318774 |
| C | 0.719087132468  | -0.080885252785 | -0.096302116908 |
| C | -0.649287481315 | 2.421018945418  | 0.130076842767  |
| C | 0.671065251356  | 2.438564955217  | -0.075339413639 |
| C | 1.492957267293  | 1.207052429872  | -0.285056689433 |
| C | -4.934345047517 | -0.068444680197 | -0.052815611026 |
| C | -5.627523293112 | -1.183389301308 | 0.437324309853  |
| C | -4.947649372682 | -2.329269982080 | 0.839393136065  |
| C | -3.558292112976 | -2.373952982129 | 0.755312677647  |
| C | -3.533567533154 | 2.333559200413  | -0.741827082263 |
| C | -4.867249601423 | 2.369955566361  | -0.671525297914 |
| C | -5.717255451974 | 1.158420663455  | -0.455517668879 |
| C | 2.906100003252  | -1.249070339970 | -0.256575173618 |
| C | 3.576951439548  | -0.076496809636 | 0.125207277851  |
| C | 4.993756842615  | 0.003597630106  | 0.025655486283  |
| C | 5.743564803006  | -1.113479907081 | -0.422764277175 |
| C | 5.079051867973  | -2.265212507202 | -0.790379386313 |
| C | 3.678353423016  | -2.323575706257 | -0.721651932361 |
| C | 2.789493948666  | 1.096291478432  | 0.600235196546  |
| C | 3.556809060345  | 2.330255827970  | 0.822195914910  |
| C | 4.922194048314  | 2.378292720138  | 0.716531998926  |
| C | 5.627328045930  | 1.223811207987  | 0.332422844143  |
| H | 1.870589766872  | 1.234339114049  | -1.320628151686 |
| H | 1.178023223639  | 3.396722400545  | -0.168680999179 |
| H | -1.167964673432 | 3.370078249838  | 0.245178296912  |
| H | -1.861127187719 | 1.178590556642  | 1.309727058203  |
| H | -1.172867173786 | -3.460912481159 | 0.046518651157  |
| H | 1.261496340810  | -3.451973080839 | -0.088825609394 |
| H | -2.343012600256 | 0.841598575829  | -1.650231463296 |
| H | -2.990463163166 | 3.253196386879  | -0.948115884351 |
| H | -5.387036883525 | 3.318205353642  | -0.802148492040 |
| H | -6.483541886466 | 1.369056543533  | 0.303845603020  |
| H | -6.712507954033 | -1.141123728016 | 0.514354535333  |
| H | -5.496353043921 | -3.182099354617 | 1.231240504649  |
| H | -3.032441687183 | -3.260316635608 | 1.098963084328  |
| H | 6.711333990466  | 1.274956019963  | 0.254597595569  |
| H | 5.464641408391  | 3.293120449714  | 0.930504777986  |
| H | 3.011800772767  | 3.211686842909  | 1.148656369322  |
| H | 2.408989822849  | 0.855700098061  | 1.618281632005  |
| H | 3.184238121547  | -3.230480801773 | -1.057442069752 |
| H | 5.631435314176  | -3.126646640427 | -1.152706727314 |
| H | 6.825163370399  | -1.041309349260 | -0.489611131591 |
| H | -6.286319698160 | 0.948486792424  | -1.376013087717 |

## 25a\_Sigma-4.xyz

51

-1155.27653235

|   |                 |                 |                 |
|---|-----------------|-----------------|-----------------|
| C | 0.173636879844  | 0.123664814701  | -0.194279180399 |
| C | -0.117205290142 | -0.209669868466 | 1.169755448269  |
| C | 0.906648356680  | -0.623702606520 | 2.005389803723  |
| C | 2.241589256741  | -0.699085636849 | 1.551742388878  |
| C | 2.549251689060  | -0.365533326016 | 0.252924500120  |
| C | 1.531967669273  | 0.045553153763  | -0.647485512074 |
| C | 1.833416594821  | 0.374140687170  | -1.996579169955 |
| C | 0.841163099932  | 0.752420792262  | -2.872393635150 |
| C | -0.502566738944 | 0.809201828258  | -2.433767141245 |
| C | -0.827616677580 | 0.501582900672  | -1.130412746437 |
| H | -1.865792710354 | 0.541459444205  | -0.813783786450 |
| H | -1.285621976738 | 1.093906569505  | -3.132139707575 |
| H | 1.085017639443  | 1.000574992707  | -3.902273309454 |
| H | 2.868273710237  | 0.316064335584  | -2.327379717545 |
| H | 3.576134237068  | -0.416060228021 | -0.102554485163 |
| H | 3.022070363535  | -1.014732681855 | 2.239067333519  |
| H | 0.682265439753  | -0.872693246132 | 3.039788402856  |
| C | -1.487362045221 | -0.061114004319 | 1.728832706363  |
| C | -2.051199877841 | 1.203277489620  | 1.808095751646  |
| C | -3.299833567947 | 1.409011355956  | 2.406787287214  |
| C | -4.012713476864 | 0.352801166235  | 2.975318351836  |
| C | -3.497296141238 | -0.985960670101 | 2.853998861496  |
| C | -2.226091028162 | -1.187868756085 | 2.221263893303  |
| C | -1.751670650417 | -2.515149105348 | 2.052233735676  |
| C | -2.486951632901 | -3.597531126944 | 2.484498667002  |
| C | -3.744574241868 | -3.398425447330 | 3.088382929613  |
| C | -4.242382863214 | -2.122504702079 | 3.255254998215  |
| H | -5.235212797517 | -1.995004626951 | 3.675899184580  |
| H | -4.335702123013 | -4.253050518652 | 3.406280023961  |
| H | -2.107378581695 | -4.605326688327 | 2.339701272831  |
| H | -0.800569329570 | -2.672470861748 | 1.553690956996  |
| C | -5.176700477546 | 0.683264858130  | 3.788237088259  |
| C | -5.235825361566 | 0.179141217664  | 5.121839084136  |
| C | -6.159291759633 | 0.643664571205  | 6.006273545204  |
| C | -7.177056383755 | 1.639194958488  | 5.639769068494  |
| C | -7.195090325390 | 2.049855287312  | 4.206378705194  |
| C | -6.205273884452 | 1.564237624517  | 3.304283031867  |
| C | -6.296792588928 | 1.909747930618  | 1.930805499483  |
| C | -7.295025723621 | 2.752837171217  | 1.482639777738  |
| C | -8.235641420913 | 3.264229828721  | 2.389649541437  |
| C | -8.190144763864 | 2.905786581447  | 3.733026076830  |
| H | -8.940415706417 | 3.285783773939  | 4.421736661338  |
| H | -9.020968354015 | 3.927481769546  | 2.037473004247  |
| H | -7.360785698363 | 3.005306226435  | 0.428606157624  |
| H | -5.595121513291 | 1.482512194457  | 1.222832374277  |
| H | -8.170133660279 | 1.265570057660  | 5.940545128486  |
| H | -7.040578210286 | 2.520921573996  | 6.291346581190  |
| H | -6.130950282603 | 0.310938423511  | 7.040743489812  |
| H | -4.465057212339 | -0.508206222693 | 5.453970950737  |
| H | -3.668401132757 | 2.424874287233  | 2.512230224911  |

H -1.497073185765 2.061790047397 1.439532609827

### 25a\_TS\_ring\_closure1\_from\_Sigma-4.xyz

51

SCF=-1155.21192092 ; NI=1 ; Neg-freq =-454.0212

|   |                 |                 |                 |
|---|-----------------|-----------------|-----------------|
| C | 3.721591723671  | 0.084711977916  | -0.415611164755 |
| C | 2.927691927126  | 0.830516962725  | 0.514011761000  |
| C | 3.539778688335  | 1.480499066409  | 1.569660123109  |
| C | 4.939904309308  | 1.416002861743  | 1.758330887491  |
| C | 5.722873459482  | 0.697153905672  | 0.885493657063  |
| C | 5.139458993403  | 0.018489624612  | -0.217024626190 |
| C | 5.931910054648  | -0.721088106742 | -1.135332142007 |
| C | 5.356970297412  | -1.367321873775 | -2.206766215765 |
| C | 3.958242060998  | -1.296895314884 | -2.408297044925 |
| C | 3.161288888389  | -0.588495450327 | -1.535366578644 |
| H | 2.089139138940  | -0.536156214262 | -1.706067595207 |
| H | 3.510591845843  | -1.803705966457 | -3.259601552914 |
| H | 5.975187583656  | -1.929516166796 | -2.902098365775 |
| H | 7.007448481768  | -0.766286509650 | -0.977261390764 |
| H | 6.800063737819  | 0.640911363054  | 1.026949792909  |
| H | 5.389639633000  | 1.936451220853  | 2.599913940597  |
| H | 2.931841822270  | 2.046831051536  | 2.271234629082  |
| C | 1.448669169806  | 0.938956321984  | 0.352258326414  |
| C | 0.892800732740  | 2.065407195883  | -0.230451906081 |
| C | -0.489062532516 | 2.174794346680  | -0.445883177784 |
| C | -1.361596997145 | 1.170548480271  | -0.036178425731 |
| C | -0.832167162702 | 0.047109708354  | 0.652593802333  |
| C | 0.574859745986  | -0.102532125130 | 0.792287177418  |
| C | 1.071921845728  | -1.329442870063 | 1.316993701312  |
| C | 0.235508723101  | -2.367430359238 | 1.711709925750  |
| C | -1.140914792890 | -2.199738253242 | 1.675471834588  |
| C | -1.733576156818 | -1.012744002642 | 1.144834376948  |
| H | -2.559317881421 | -0.664253802975 | 1.768992240744  |
| H | -1.794423464053 | -2.965160605887 | 2.085054769196  |
| H | 0.665296203807  | -3.285413833984 | 2.101000012032  |
| H | 2.147723193360  | -1.458581651934 | 1.393431067182  |
| C | -2.809268636329 | 1.220057314889  | -0.288762292359 |
| C | -3.491278514700 | 2.493170599788  | -0.329201032131 |
| C | -4.834377369863 | 2.558412440885  | -0.439057955752 |
| C | -5.684254576599 | 1.343754019452  | -0.535906485802 |
| C | -4.951542949517 | 0.032776989459  | -0.432290877873 |
| C | -3.509425163525 | 0.028090981676  | -0.410692629614 |
| C | -2.770100322034 | -1.263194525758 | -0.331604248276 |
| C | -3.581004657814 | -2.470143196612 | -0.275228652590 |
| C | -4.941227694075 | -2.402184989671 | -0.278705328867 |
| C | -5.634588964844 | -1.154335044121 | -0.346503460773 |
| H | -6.721631106155 | -1.153133709615 | -0.338043386971 |
| H | -5.523157300382 | -3.320627631529 | -0.268238884553 |
| H | -3.075287625172 | -3.431452703815 | -0.273147051492 |
| H | -1.946721677344 | -1.348194059053 | -1.044265122954 |
| H | -6.488822349463 | 1.400568192748  | 0.211586301126  |
| H | -6.217779494707 | 1.378678199074  | -1.501526354164 |
| H | -5.336240942213 | 3.522653148899  | -0.456015198044 |



|   |                 |                |                 |
|---|-----------------|----------------|-----------------|
| H | -2.908464912048 | 3.403510229790 | -0.231147783425 |
| H | -0.868060289245 | 3.044089347394 | -0.974641228758 |
| H | 1.545517272977  | 2.864252416418 | -0.571967165354 |

**Intermediary\_for\_the\_formation\_of\_26\_from\_Sigma4\_ring\_closure-1.xyz**

51

-1155.21720643

|   |                 |                 |                 |
|---|-----------------|-----------------|-----------------|
| C | 3.763574214556  | 0.098928725894  | -0.399990143403 |
| C | 2.946074740009  | 0.813331257619  | 0.534708578560  |
| C | 3.532891472536  | 1.457848297206  | 1.608478336486  |
| C | 4.930127647528  | 1.409458597531  | 1.817240415224  |
| C | 5.735342900795  | 0.714990460766  | 0.944855652227  |
| C | 5.178962016558  | 0.049035241400  | -0.178819246802 |
| C | 5.997716368384  | -0.659965845181 | -1.098031537096 |
| C | 5.451555034264  | -1.288014552210 | -2.194788088276 |
| C | 4.056718210465  | -1.226978829059 | -2.422848465807 |
| C | 3.233956674965  | -0.550320008146 | -1.548725505203 |
| H | 2.166271926044  | -0.503475373148 | -1.745980143293 |
| H | 3.631809575951  | -1.714593339067 | -3.296619422704 |
| H | 6.089684843032  | -1.826349431024 | -2.890875291689 |
| H | 7.070471779151  | -0.694979778917 | -0.920350520947 |
| H | 6.810771017382  | 0.670013225136  | 1.102287218631  |
| H | 5.359624021783  | 1.921045552216  | 2.674510617378  |
| H | 2.906261395261  | 2.002193916579  | 2.310826474484  |
| C | 1.469888296485  | 0.905809624346  | 0.359155738426  |
| C | 0.888496721005  | 2.078683112730  | -0.096646098517 |
| C | -0.496037492970 | 2.189761374280  | -0.276316929495 |
| C | -1.371518596809 | 1.132833989788  | 0.009929492337  |
| C | -0.809939743146 | -0.061031043246 | 0.496102732152  |
| C | 0.599158386899  | -0.186394130357 | 0.667351565606  |
| C | 1.102750022405  | -1.421077367788 | 1.127369331540  |
| C | 0.293558898826  | -2.535223859317 | 1.404852737504  |
| C | -1.064586228181 | -2.440695879057 | 1.253025589684  |
| C | -1.717478360227 | -1.186782343478 | 0.858146139603  |
| H | -2.237986244566 | -0.883864402998 | 1.794761255331  |
| H | -1.695241407028 | -3.288008500773 | 1.505183285672  |
| H | 0.751457994416  | -3.456469550461 | 1.749388552094  |
| H | 2.176308722501  | -1.514807405716 | 1.270766929830  |
| C | -2.825598988546 | 1.220773542295  | -0.163689467974 |
| C | -3.482291392683 | 2.524408541495  | -0.180969914234 |
| C | -4.799062131558 | 2.645086301274  | -0.417261410400 |
| C | -5.655813168983 | 1.458479640612  | -0.725402960920 |
| C | -5.005523128333 | 0.127736452570  | -0.422843962558 |
| C | -3.563942175371 | 0.066257673135  | -0.273539942950 |
| C | -2.869829240254 | -1.284609167306 | -0.206535156023 |
| C | -3.797739372897 | -2.445146728162 | -0.002988684372 |
| C | -5.134920106298 | -2.298086053555 | -0.068663893094 |
| C | -5.747540304739 | -1.008340993078 | -0.294103341415 |
| H | -6.831847152122 | -0.953282464059 | -0.361292641629 |
| H | -5.779831894604 | -3.168357032979 | 0.027249266592  |
| H | -3.364000012765 | -3.435210092624 | 0.102699201017  |
| H | -2.345890214059 | -1.452074841571 | -1.165374331177 |
| H | -6.620533415748 | 1.538661924862  | -0.208747947412 |

|   |                 |                |                 |
|---|-----------------|----------------|-----------------|
| H | -5.910858219526 | 1.493169614068 | -1.799559926958 |
| H | -5.270857629294 | 3.624878410428 | -0.419217997826 |
| H | -2.890695994180 | 3.410108434212 | 0.031926560406  |
| H | -0.887595558586 | 3.122103533325 | -0.671043634813 |
| H | 1.521766292271  | 2.925830569509 | -0.344568063797 |

## OXIDATIVE AROMATIC COUPLING

### 8.xyz

35

SCF = -786.793209718

|   |                 |                 |                 |
|---|-----------------|-----------------|-----------------|
| C | -0.007155257129 | -0.090923837031 | 0.003866877349  |
| C | 0.011065144528  | -0.018476417956 | 1.386380342314  |
| C | 1.252049365882  | 0.015413182267  | 2.100535170429  |
| C | 2.465271420564  | 0.004399255552  | 1.339081426130  |
| C | 2.403807291340  | -0.049991511114 | -0.078007964433 |
| C | 1.195883826773  | -0.102503869513 | -0.733779562268 |
| C | 3.710064985480  | 0.033284942887  | 2.021890023193  |
| C | 3.760620076237  | 0.059952195961  | 3.396772764102  |
| C | 2.562916961498  | 0.051708387635  | 4.148720083168  |
| C | 1.338456487798  | 0.028247859076  | 3.517872842623  |
| C | -1.286867828563 | 0.006532131526  | 2.099573582742  |
| C | -1.814637755614 | 1.123308058362  | 2.793840716451  |
| C | -3.097707601563 | 1.000569211255  | 3.423242425174  |
| C | -3.803114692890 | -0.226283590225 | 3.312807190760  |
| C | -3.259329580838 | -1.261330600262 | 2.612403138256  |
| N | -2.028173183082 | -1.107730097024 | 2.038935323229  |
| C | -3.629179370271 | 2.111685719833  | 4.118636121305  |
| C | -2.924603425878 | 3.294326893219  | 4.174159814585  |
| C | -1.668035166117 | 3.421339786933  | 3.534934423718  |
| C | -1.118878203751 | 2.359332683147  | 2.855690324619  |
| H | -4.598411441566 | 2.020260380966  | 4.600590096825  |
| H | -3.339244723221 | 4.144794435781  | 4.708006241074  |
| H | -1.137138933879 | 4.367582968166  | 3.579808615868  |
| H | -0.158483979397 | 2.458777702403  | 2.360575151238  |
| H | -4.776940848143 | -0.344112361114 | 3.775819811537  |
| H | -3.731130408083 | -2.225738604644 | 2.475082174099  |
| H | 0.431322321395  | 0.012780199427  | 4.115997260188  |
| H | 2.609023911480  | 0.060626669022  | 5.234528247099  |
| H | 4.718954700789  | 0.080544038321  | 3.908607570581  |
| H | 4.626335227061  | 0.028587204969  | 1.435967597339  |
| H | 3.333950456013  | -0.055107141220 | -0.641383902817 |
| H | 1.156819235882  | -0.145995314134 | -1.818288536355 |
| H | -0.957082377731 | -0.110053582261 | -0.524987228762 |
| H | -1.633159988259 | -1.901192679650 | 1.539731602959  |

### 8-rc.xyz (rc= radical cation)

34

SCF = -786.53997828

|   |                 |                 |                |
|---|-----------------|-----------------|----------------|
| C | -0.007155257129 | -0.090923837031 | 0.003866877349 |
| C | 0.011065144528  | -0.018476417956 | 1.386380342314 |

|   |                 |                 |                 |
|---|-----------------|-----------------|-----------------|
| C | 1.252049365882  | 0.015413182267  | 2.100535170429  |
| C | 2.465271420564  | 0.004399255552  | 1.339081426130  |
| C | 2.403807291340  | -0.049991511114 | -0.078007964433 |
| C | 1.195883826773  | -0.102503869513 | -0.733779562268 |
| C | 3.710064985480  | 0.033284942887  | 2.021890023193  |
| C | 3.760620076237  | 0.059952195961  | 3.396772764102  |
| C | 2.562916961498  | 0.051708387635  | 4.148720083168  |
| C | 1.338456487798  | 0.028247859076  | 3.517872842623  |
| C | -1.286867828563 | 0.006532131526  | 2.099573582742  |
| C | -1.814637755614 | 1.123308058362  | 2.793840716451  |
| C | -3.097707601563 | 1.000569211255  | 3.423242425174  |
| C | -3.803114692890 | -0.226283590225 | 3.312807190760  |
| C | -3.259329580838 | -1.261330600262 | 2.612403138256  |
| N | -2.028173183082 | -1.107730097024 | 2.038935323229  |
| C | -3.629179370271 | 2.111685719833  | 4.118636121305  |
| C | -2.924603425878 | 3.294326893219  | 4.174159814585  |
| C | -1.668035166117 | 3.421339786933  | 3.534934423718  |
| C | -1.118878203751 | 2.359332683147  | 2.855690324619  |
| H | -4.598411441566 | 2.020260380966  | 4.600590096825  |
| H | -3.339244723221 | 4.144794435781  | 4.708006241074  |
| H | -1.137138933879 | 4.367582968166  | 3.579808615868  |
| H | -0.158483979397 | 2.458777702403  | 2.360575151238  |
| H | -4.776940848143 | -0.344112361114 | 3.775819811537  |
| H | -3.731130408083 | -2.225738604644 | 2.475082174099  |
| H | 0.431322321395  | 0.012780199427  | 4.115997260188  |
| H | 2.609023911480  | 0.060626669022  | 5.234528247099  |
| H | 4.718954700789  | 0.080544038321  | 3.908607570581  |
| H | 4.626335227061  | 0.028587204969  | 1.435967597339  |
| H | 3.333950456013  | -0.055107141220 | -0.641383902817 |
| H | 1.156819235882  | -0.145995314134 | -1.818288536355 |
| H | -0.957082377731 | -0.110053582261 | -0.524987228762 |
| H | -1.633159988259 | -1.901192679650 | 1.539731602959  |

## 9.xyz

34

SCF = -786.791411722

|   |                 |                 |                 |
|---|-----------------|-----------------|-----------------|
| C | -0.042538722433 | -0.095266506086 | 0.062883343917  |
| C | -0.011961330375 | -0.026544144010 | 1.462765261030  |
| C | 1.271123425546  | -0.002062449427 | 2.104438856966  |
| C | 2.435425972478  | -0.074771762473 | 1.294806227124  |
| C | 2.329548884521  | -0.155378795743 | -0.063519376937 |
| N | 1.087821235629  | -0.158712976361 | -0.634907857549 |
| C | -1.216527091290 | 0.037174749141  | 2.234880677446  |
| C | -1.097189628319 | 0.146342401403  | 3.605890478223  |
| C | 0.167657640439  | 0.179006119802  | 4.239747835559  |
| C | 1.334235115956  | 0.100614769513  | 3.511979265199  |
| C | -2.556176382892 | 0.015310020217  | 1.582530184337  |
| C | -3.101617392363 | -1.201173538792 | 1.058075320223  |
| C | -4.387718777190 | -1.161039952089 | 0.426901228032  |
| C | -5.091708882980 | 0.069445031902  | 0.352235245306  |
| C | -4.554736487506 | 1.218837100510  | 0.883304728603  |
| C | -3.283101005002 | 1.188785252265  | 1.499534535368  |
| C | -4.936301728262 | -2.359877872974 | -0.101773827542 |

|   |                 |                 |                 |
|---|-----------------|-----------------|-----------------|
| C | -4.256216328630 | -3.552724193549 | -0.005273916731 |
| C | -2.995086546715 | -3.597643157347 | 0.633835383249  |
| C | -2.432454888114 | -2.452024875978 | 1.152763797491  |
| H | 2.302089051703  | 0.119790706267  | 4.004454814912  |
| H | 0.211282491174  | 0.261596275475  | 5.322143685556  |
| H | -1.996356418553 | 0.196856435583  | 4.213361676819  |
| H | 3.419215563585  | -0.065307177302 | 1.751919065673  |
| H | -0.965731617267 | -0.095175416328 | -0.504213993892 |
| H | 3.171101470791  | -0.213989516423 | -0.741415880403 |
| H | -2.864044108928 | 2.106366301576  | 1.905547527040  |
| H | -5.099843603813 | 2.157333769993  | 0.829366018883  |
| H | -6.067642637645 | 0.087028156184  | -0.127843641381 |
| H | -5.911459783081 | -2.318577995027 | -0.582195676107 |
| H | -4.688650111223 | -4.463382293557 | -0.411531830585 |
| H | -2.469233158886 | -4.545076684218 | 0.720952878416  |
| H | -1.469872934060 | -2.508397881459 | 1.654147696349  |
| H | 1.024290082277  | -0.210101783899 | -1.648109447260 |

### 9-rc.xyz

34

SCF = -786.54757818

|   |                 |                 |                 |
|---|-----------------|-----------------|-----------------|
| C | -0.040076329500 | -0.201035067689 | 0.052793275262  |
| C | -0.021388296656 | -0.074798809035 | 1.450184927602  |
| C | 1.257557582732  | -0.031612862626 | 2.096710090566  |
| C | 2.426422850912  | -0.174633781771 | 1.306917970257  |
| C | 2.331138635298  | -0.319595405482 | -0.047807784005 |
| N | 1.096267909265  | -0.318063355619 | -0.627726271727 |
| C | -1.218389156316 | 0.082934556546  | 2.227748583176  |
| C | -1.096408276886 | 0.336442233214  | 3.582147322092  |
| C | 0.166629181346  | 0.365807061846  | 4.215161306448  |
| C | 1.323635275439  | 0.174054757619  | 3.495713187354  |
| C | -2.570513433731 | 0.009949120128  | 1.631058580219  |
| C | -3.080657393683 | -1.182266996546 | 1.029688520713  |
| C | -4.369924146170 | -1.148106605099 | 0.408831009281  |
| C | -5.124699483890 | 0.041855507843  | 0.428785966009  |
| C | -4.633680914931 | 1.186922163123  | 1.073337346902  |
| C | -3.384297115115 | 1.163735096849  | 1.676181066409  |
| C | -4.888773452969 | -2.323644233950 | -0.180417949641 |
| C | -4.170063476632 | -3.524858492266 | -0.142903671703 |
| C | -2.934127388696 | -3.569371686385 | 0.493920791196  |
| C | -2.394665315216 | -2.414751040426 | 1.080849731190  |
| H | 2.292703669156  | 0.195478983314  | 3.985136557938  |
| H | 0.213701637902  | 0.536912962306  | 5.286267009813  |
| H | -1.990285820850 | 0.475894044880  | 4.183240569232  |
| H | 3.405293202998  | -0.158260258991 | 1.773527629686  |
| H | -0.949128444090 | -0.194013173042 | -0.536207266419 |
| H | 3.177188994035  | -0.426952454493 | -0.713978151334 |
| H | -2.999325420174 | 2.058689052604  | 2.155841981260  |
| H | -5.228547077659 | 2.094419593972  | 1.090816278427  |
| H | -6.102737028006 | 0.063138127227  | -0.044021926897 |
| H | -5.864029887129 | -2.289529997258 | -0.657983545144 |
| H | -4.586559330037 | -4.417814506092 | -0.597899412231 |
| H | -2.380284654565 | -4.501329115502 | 0.548344684304  |

|   |                 |                 |                 |
|---|-----------------|-----------------|-----------------|
| H | -1.445803808507 | -2.486995883543 | 1.603575543429  |
| H | 1.041448080897  | -0.401341418868 | -1.640153666328 |

**11.xyz**

35

-786.727987288

|   |                 |                 |                 |
|---|-----------------|-----------------|-----------------|
| C | -0.010673457960 | -2.330069196818 | 4.730642977232  |
| C | 1.102368978889  | -2.753732622328 | 4.000740665214  |
| C | 1.196430245523  | -2.527605476170 | 2.632872432493  |
| C | 0.164603670148  | -1.858436806309 | 1.944078576898  |
| C | -0.955714079723 | -1.433292804155 | 2.678665732166  |
| C | -1.046836146110 | -1.674139780705 | 4.051419611425  |
| O | -0.096676147863 | -2.590731156261 | 6.082063071028  |
| N | 0.258346828074  | -1.682605754732 | 0.568956946439  |
| O | -2.148112628865 | -1.199587646370 | 4.724420281445  |
| C | -0.599395488501 | -0.736986070378 | -0.132391736164 |
| C | 0.306259691701  | -1.500088575982 | 6.911839730706  |
| C | -3.070909164337 | -2.208963926424 | 5.142109085685  |
| C | -0.236933537858 | -0.677942602675 | -1.597335923708 |
| C | 0.356885315668  | 0.465358126469  | -2.142205826928 |
| C | 0.697500053420  | 0.515944232624  | -3.496502904920 |
| C | 0.449946348144  | -0.582457316855 | -4.320260376197 |
| C | -0.140802645059 | -1.730522815155 | -3.784608759103 |
| C | -0.481798666857 | -1.776102876659 | -2.433352968840 |
| H | 1.903981891463  | -3.267655007527 | 4.526067713937  |
| H | 2.071586322380  | -2.873959622153 | 2.087026627222  |
| H | -1.780150364497 | -0.909674527012 | 2.205217027566  |
| H | 1.206727230492  | -1.709334013862 | 0.214090167205  |
| H | -0.537751694547 | 0.271931875606  | 0.307728712156  |
| H | -1.640550619260 | -1.069107237820 | -0.027275531999 |
| H | 0.176834694850  | -1.831651047049 | 7.944810355632  |
| H | 1.360700250521  | -1.249592565284 | 6.737731837028  |
| H | -0.315893910741 | -0.616321017509 | 6.728595273515  |
| H | -3.875507031882 | -1.689296436525 | 5.666900305704  |
| H | -3.482108080541 | -2.734763864622 | 4.270982515356  |
| H | -2.591339857698 | -2.925891235218 | 5.816462084928  |
| H | 0.552514506013  | 1.324483144848  | -1.503164954372 |
| H | 1.156397523588  | 1.413100019130  | -3.905228134068 |
| H | 0.713564114494  | -0.545466546539 | -5.374555037165 |
| H | -0.339944693403 | -2.588871173376 | -4.421982473597 |
| H | -0.944490783778 | -2.669971711130 | -2.019863706822 |

**11-rc.xyz**

35

-786.546796822

|   |                 |                 |                |
|---|-----------------|-----------------|----------------|
| C | 0.559024219612  | -2.217821276314 | 4.802055807214 |
| C | 1.681062075190  | -2.436426586834 | 3.965930308774 |
| C | 1.630097242051  | -2.191325251197 | 2.622530408656 |
| C | 0.420445694974  | -1.701603983300 | 2.032471242924 |
| C | -0.711740323871 | -1.472236513201 | 2.852059394091 |
| C | -0.662823125522 | -1.721108716530 | 4.210978771386 |
| O | 0.766041100581  | -2.503443425539 | 6.077794181919 |

|   |                 |                 |                 |
|---|-----------------|-----------------|-----------------|
| N | 0.393931404720  | -1.474316913135 | 0.711038426149  |
| O | -1.687609846228 | -1.533616599447 | 5.047187300473  |
| C | -0.751007895127 | -0.979178970698 | -0.055263822753 |
| C | -0.193824459187 | -2.379940087975 | 7.145576096328  |
| C | -2.932647916497 | -1.052561787215 | 4.533392046013  |
| C | -0.409187195058 | -0.890906367783 | -1.521269148108 |
| C | 0.049364211011  | 0.311829077915  | -2.071033423468 |
| C | 0.382751115974  | 0.387858954114  | -3.423998967536 |
| C | 0.260610891538  | -0.739558773061 | -4.238098106581 |
| C | -0.197579694897 | -1.942520566648 | -3.696712038106 |
| C | -0.531931477202 | -2.017187083466 | -2.344380102771 |
| H | 2.586948090194  | -2.808519572512 | 4.433531322894  |
| H | 2.501074630678  | -2.365373379471 | 1.997784208991  |
| H | -1.624954762127 | -1.097326929105 | 2.409001850407  |
| H | 1.242159365394  | -1.657970620487 | 0.185463371574  |
| H | -1.035055587175 | 0.006045479782  | 0.334614012972  |
| H | -1.596962460508 | -1.659612056150 | 0.103671271390  |
| H | 0.351902571317  | -2.710021244379 | 8.028827096661  |
| H | -0.509948487355 | -1.342222306413 | 7.256751589141  |
| H | -1.053087225319 | -3.025854357927 | 6.962672888024  |
| H | -3.593918777815 | -0.987597691115 | 5.396479000782  |
| H | -2.805929314942 | -0.061841902382 | 4.085370307710  |
| H | -3.342457253200 | -1.756176972845 | 3.801567088680  |
| H | 0.140733935494  | 1.194021849434  | -1.440803307494 |
| H | 0.733286708569  | 1.328086281163  | -3.841898104038 |
| H | 0.516882127852  | -0.679937269597 | -5.292804422003 |
| H | -0.300596522984 | -2.821319768044 | -4.328065706281 |
| H | -0.895994394248 | -2.954318704562 | -1.927727446918 |

## 12.xyz

48

-1153.69621125

|   |                 |                 |                 |
|---|-----------------|-----------------|-----------------|
| C | -2.117717707869 | 3.558388728924  | -0.622281592524 |
| C | -2.426098805552 | 2.675000453665  | 0.462628951275  |
| C | -3.595638243299 | 2.885858168736  | 1.184929971034  |
| C | -4.472257567893 | 3.939154427254  | 0.879333707098  |
| C | -4.186761400364 | 4.805889032635  | -0.150586159085 |
| C | -3.006968696756 | 4.646049860233  | -0.920552415942 |
| C | -2.704688151365 | 5.542292788898  | -1.993567235750 |
| C | -1.570042669650 | 5.313767815454  | -2.747998429094 |
| C | -0.706063156355 | 4.244500638540  | -2.465596045106 |
| C | -0.942443421432 | 3.365564140344  | -1.416017475602 |
| C | -3.593135499047 | 6.693625258724  | -2.325303967891 |
| C | -3.602697574723 | 7.879221610801  | -1.519514780993 |
| C | -4.400472977775 | 6.630795751275  | -3.446386445090 |
| C | -5.249949958302 | 7.703190865118  | -3.805094563561 |
| C | -5.287311769814 | 8.843501282572  | -3.036956250358 |
| C | -4.467384634161 | 8.962306382984  | -1.883923636901 |
| C | -4.478137815164 | 10.137931739175 | -1.085709567368 |
| C | -3.667256096975 | 10.250276417897 | 0.021053146114  |
| C | -2.804064005222 | 9.186653554411  | 0.375713709343  |
| C | -2.773453005659 | 8.032063498136  | -0.375247103083 |
| C | -0.026833019191 | 2.253199616628  | -1.106713853141 |

|   |                 |                 |                 |
|---|-----------------|-----------------|-----------------|
| C | -1.503203034888 | 1.570219059596  | 0.783107510244  |
| C | 0.566545497435  | 0.307209677444  | 0.297881034129  |
| C | 0.278020606819  | -0.554082277628 | 1.386040599101  |
| C | -0.854205655682 | -0.357047438058 | 2.142958685182  |
| C | -1.734750485246 | 0.697042612105  | 1.841368792273  |
| C | -0.328040997512 | 1.384096223078  | -0.011155378204 |
| C | 1.130199699223  | 2.019480410324  | -1.843487068387 |
| C | 2.003161197293  | 0.959704945480  | -1.539860906976 |
| C | 1.730904398128  | 0.115793750072  | -0.487375476351 |
| H | -3.860900833304 | 2.229014064290  | 2.006223366848  |
| H | -5.380472431020 | 4.063848612158  | 1.463672635419  |
| H | -4.866797091409 | 5.618506102989  | -0.387108558073 |
| H | -1.331403573738 | 5.983297486456  | -3.571006803691 |
| H | 0.169155270722  | 4.128002890811  | -3.095526448929 |
| H | -4.389411316287 | 5.731465807697  | -4.057980119231 |
| H | -5.875851091064 | 7.616021393769  | -4.689786865045 |
| H | -5.941837682912 | 9.670466736880  | -3.304647488757 |
| H | -5.140264787273 | 10.953903090728 | -1.368601173741 |
| H | -3.684614733175 | 11.156020529101 | 0.622253984357  |
| H | -2.160286686887 | 9.283033458205  | 1.246665184790  |
| H | -2.104711731426 | 7.222705542201  | -0.095534940027 |
| H | 0.964725020666  | -1.367189946383 | 1.610506917419  |
| H | -1.077576754895 | -1.013683386066 | 2.980060194788  |
| H | -2.612629533607 | 0.814030361538  | 2.467393965669  |
| H | 1.388002137997  | 2.661110429246  | -2.679283047094 |
| H | 2.895506293281  | 0.815980330396  | -2.143895135981 |
| H | 2.401363529066  | -0.705243874656 | -0.243665538732 |

## 12-rc.xyz

48

-1153.50075527

|   |                 |                 |                 |
|---|-----------------|-----------------|-----------------|
| C | -2.103000000000 | 3.568000000000  | -0.635000000000 |
| C | -2.387000000000 | 2.724000000000  | 0.481000000000  |
| C | -3.548000000000 | 2.973000000000  | 1.240000000000  |
| C | -4.416000000000 | 4.010000000000  | 0.920000000000  |
| C | -4.141000000000 | 4.845000000000  | -0.154000000000 |
| C | -2.981000000000 | 4.659000000000  | -0.937000000000 |
| C | -2.700000000000 | 5.523000000000  | -2.041000000000 |
| C | -1.604000000000 | 5.230000000000  | -2.855000000000 |
| C | -0.757000000000 | 4.167000000000  | -2.571000000000 |
| C | -0.964000000000 | 3.328000000000  | -1.459000000000 |
| C | -3.546000000000 | 6.699000000000  | -2.362000000000 |
| C | -3.614000000000 | 7.838000000000  | -1.492000000000 |
| C | -4.260000000000 | 6.698000000000  | -3.549000000000 |
| C | -5.100000000000 | 7.777000000000  | -3.899000000000 |
| C | -5.209000000000 | 8.866000000000  | -3.065000000000 |
| C | -4.468000000000 | 8.930000000000  | -1.856000000000 |
| C | -4.545000000000 | 10.065000000000 | -1.005000000000 |
| C | -3.799000000000 | 10.135000000000 | 0.149000000000  |
| C | -2.935000000000 | 9.071000000000  | 0.497000000000  |
| C | -2.844000000000 | 7.953000000000  | -0.303000000000 |
| C | -0.064000000000 | 2.238000000000  | -1.144000000000 |
| C | -1.484000000000 | 1.634000000000  | 0.801000000000  |

|   |                 |                 |                 |
|---|-----------------|-----------------|-----------------|
| C | 0.553000000000  | 0.338000000000  | 0.302000000000  |
| C | 0.289000000000  | -0.485000000000 | 1.420000000000  |
| C | -0.828000000000 | -0.259000000000 | 2.210000000000  |
| C | -1.700000000000 | 0.783000000000  | 1.904000000000  |
| C | -0.338000000000 | 1.411000000000  | -0.015000000000 |
| C | 1.085000000000  | 1.966000000000  | -1.916000000000 |
| C | 1.948000000000  | 0.919000000000  | -1.602000000000 |
| C | 1.690000000000  | 0.110000000000  | -0.505000000000 |
| H | -3.794000000000 | 2.346000000000  | 2.088000000000  |
| H | -5.313000000000 | 4.164000000000  | 1.513000000000  |
| H | -4.829000000000 | 5.646000000000  | -0.404000000000 |
| H | -1.391000000000 | 5.868000000000  | -3.708000000000 |
| H | 0.088000000000  | 4.007000000000  | -3.230000000000 |
| H | -4.196000000000 | 5.836000000000  | -4.210000000000 |
| H | -5.665000000000 | 7.735000000000  | -4.827000000000 |
| H | -5.859000000000 | 9.698000000000  | -3.327000000000 |
| H | -5.201000000000 | 10.884000000000 | -1.288000000000 |
| H | -3.864000000000 | 11.011000000000 | 0.790000000000  |
| H | -2.334000000000 | 9.138000000000  | 1.400000000000  |
| H | -2.165000000000 | 7.152000000000  | -0.023000000000 |
| H | 0.973000000000  | -1.298000000000 | 1.652000000000  |
| H | -1.028000000000 | -0.892000000000 | 3.069000000000  |
| H | -2.560000000000 | 0.928000000000  | 2.547000000000  |
| H | 1.323000000000  | 2.578000000000  | -2.777000000000 |
| H | 2.823000000000  | 0.742000000000  | -2.219000000000 |
| H | 2.360000000000  | -0.708000000000 | -0.255000000000 |

### 13.xyz

48

-1152.03476926

|   |                 |                 |                 |
|---|-----------------|-----------------|-----------------|
| C | 0.177810626837  | -0.166301617745 | -0.232346201671 |
| C | 0.075750200496  | -0.163613567903 | 1.159098152558  |
| C | 1.203664769515  | 0.090580696412  | 1.945346280924  |
| C | 2.430599206025  | 0.346590309904  | 1.310034200378  |
| C | 2.534726183557  | 0.359932053410  | -0.082820570968 |
| C | 1.390413770867  | 0.089569466242  | -0.863601247536 |
| C | 1.143748724132  | 0.037361477751  | 3.432401471690  |
| C | 2.048681390223  | -0.804981395401 | 4.099151576780  |
| C | 2.024337469855  | -0.960915312842 | 5.483125688975  |
| C | 1.075806288075  | -0.267860946750 | 6.234736771308  |
| C | 0.178812047594  | 0.581255222764  | 5.590959411569  |
| C | 0.196530236418  | 0.759202028890  | 4.197666153432  |
| C | -0.757849106545 | 1.736805009306  | 3.605506782321  |
| C | -2.124301777368 | 1.651697923596  | 3.922370713129  |
| C | -3.041851912090 | 2.578171651758  | 3.421353578122  |
| C | -2.582519675421 | 3.630265053780  | 2.600328370912  |
| C | -1.229395809244 | 3.713485471809  | 2.289615282342  |
| C | -0.319292561621 | 2.776817205846  | 2.780333611302  |
| O | -4.380291667636 | 2.539563340546  | 3.654882694077  |
| C | -4.891692692408 | 1.497849999633  | 4.474467564945  |
| O | -3.460617901979 | 4.529208798946  | 2.047458780820  |
| C | -3.975278856237 | 5.506825949125  | 2.954940584891  |
| O | 3.677008136242  | 0.633958105008  | -0.766530350283 |



|   |                 |                 |                 |
|---|-----------------|-----------------|-----------------|
| C | 4.854552728319  | 0.919594869251  | -0.024675116421 |
| O | 1.440083904455  | 0.146894757446  | -2.234378910463 |
| C | 2.093937929664  | -0.958213066741 | -2.863254528402 |
| H | -0.538077662962 | 1.149010003161  | 6.179843872377  |
| H | 1.040126494743  | -0.376896969052 | 7.315962605475  |
| H | 2.733925618239  | -1.627422101056 | 5.967328401335  |
| H | 2.765629606711  | -1.371048415546 | 3.508739732705  |
| H | -2.466374249453 | 0.831729534607  | 4.545758425723  |
| H | 0.733418109534  | 2.864694675228  | 2.527826175841  |
| H | -0.897925298812 | 4.528518957352  | 1.651090763176  |
| H | -0.880935334832 | -0.371204377447 | 1.629625753462  |
| H | 3.300938271232  | 0.563903012186  | 1.920903183696  |
| H | -0.692106262603 | -0.366823739494 | -0.852719642620 |
| H | 5.632921050561  | 1.105273639346  | -0.766190068812 |
| H | 4.724707332165  | 1.812819554963  | 0.598366663665  |
| H | 5.144628060974  | 0.068987374839  | 0.604141299270  |
| H | 2.051412217821  | -0.766514240390 | -3.937555406084 |
| H | 3.138527725131  | -1.033439910859 | -2.544217171716 |
| H | 1.566756602773  | -1.893807197207 | -2.637292375035 |
| H | -4.651367318733 | 6.137125983455  | 2.373269501879  |
| H | -4.526938696771 | 5.034305396274  | 3.774198360684  |
| H | -3.160115414931 | 6.120148558060  | 3.359442122230  |
| H | -5.968635703683 | 1.664237000664  | 4.526051637865  |
| H | -4.696151849084 | 0.512898513457  | 4.033396019566  |
| H | -4.466657245721 | 1.541680710355  | 5.484646424897  |

### 13-rc.xyz

48

-1151.83070846

|   |                 |                 |                 |
|---|-----------------|-----------------|-----------------|
| C | 0.031000000000  | -0.093000000000 | -0.063000000000 |
| C | 0.009000000000  | -0.062000000000 | 1.317000000000  |
| C | 1.215000000000  | 0.055000000000  | 2.056000000000  |
| C | 2.426000000000  | 0.138000000000  | 1.349000000000  |
| C | 2.461000000000  | 0.143000000000  | -0.042000000000 |
| C | 1.236000000000  | 0.003000000000  | -0.777000000000 |
| C | 1.205000000000  | 0.013000000000  | 3.524000000000  |
| C | 2.147000000000  | -0.790000000000 | 4.194000000000  |
| C | 2.090000000000  | -0.969000000000 | 5.569000000000  |
| C | 1.083000000000  | -0.340000000000 | 6.314000000000  |
| C | 0.161000000000  | 0.479000000000  | 5.678000000000  |
| C | 0.217000000000  | 0.697000000000  | 4.288000000000  |
| C | -0.685000000000 | 1.685000000000  | 3.681000000000  |
| C | -2.032000000000 | 1.759000000000  | 4.071000000000  |
| C | -2.897000000000 | 2.710000000000  | 3.536000000000  |
| C | -2.391000000000 | 3.672000000000  | 2.598000000000  |
| C | -1.041000000000 | 3.598000000000  | 2.224000000000  |
| C | -0.202000000000 | 2.632000000000  | 2.742000000000  |
| O | -4.208000000000 | 2.776000000000  | 3.819000000000  |
| C | -4.767000000000 | 1.860000000000  | 4.760000000000  |
| O | -3.090000000000 | 4.642000000000  | 2.004000000000  |
| C | -4.373000000000 | 5.118000000000  | 2.443000000000  |
| O | 3.581000000000  | 0.304000000000  | -0.765000000000 |
| C | 4.832000000000  | 0.451000000000  | -0.093000000000 |

|   |                 |                 |                 |
|---|-----------------|-----------------|-----------------|
| O | 1.107000000000  | -0.023000000000 | -2.106000000000 |
| C | 2.184000000000  | -0.242000000000 | -3.032000000000 |
| H | -0.582000000000 | 1.010000000000  | 6.267000000000  |
| H | 1.035000000000  | -0.474000000000 | 7.391000000000  |
| H | 2.813000000000  | -1.613000000000 | 6.061000000000  |
| H | 2.894000000000  | -1.325000000000 | 3.614000000000  |
| H | -2.420000000000 | 1.021000000000  | 4.764000000000  |
| H | 0.850000000000  | 2.640000000000  | 2.475000000000  |
| H | -0.670000000000 | 4.346000000000  | 1.529000000000  |
| H | -0.933000000000 | -0.195000000000 | 1.838000000000  |
| H | 3.350000000000  | 0.257000000000  | 1.903000000000  |
| H | -0.884000000000 | -0.216000000000 | -0.634000000000 |
| H | 5.574000000000  | 0.557000000000  | -0.884000000000 |
| H | 4.830000000000  | 1.347000000000  | 0.537000000000  |
| H | 5.055000000000  | -0.436000000000 | 0.509000000000  |
| H | 1.686000000000  | -0.416000000000 | -3.987000000000 |
| H | 2.826000000000  | 0.637000000000  | -3.096000000000 |
| H | 2.768000000000  | -1.119000000000 | -2.747000000000 |
| H | -4.529000000000 | 6.035000000000  | 1.874000000000  |
| H | -5.155000000000 | 4.393000000000  | 2.214000000000  |
| H | -4.359000000000 | 5.337000000000  | 3.512000000000  |
| H | -5.820000000000 | 2.130000000000  | 4.835000000000  |
| H | -4.674000000000 | 0.830000000000  | 4.400000000000  |
| H | -4.285000000000 | 1.966000000000  | 5.737000000000  |

#### 14.xyz

57

-1286.17412145

|   |                 |                 |                 |
|---|-----------------|-----------------|-----------------|
| C | 6.205516210371  | -1.746188078939 | 0.320975869632  |
| C | 7.472653452831  | -2.357712857645 | 0.314542891395  |
| C | 8.287053647588  | -2.298676404752 | -0.808346524640 |
| C | 7.842940064195  | -1.611609385204 | -1.954997990888 |
| C | 6.596162377260  | -1.009601043318 | -1.951379537090 |
| C | 5.762681501259  | -1.070790719466 | -0.822101729109 |
| C | 3.912274970017  | -1.378358612488 | 1.295644619248  |
| C | 5.361000557705  | -1.790901455151 | 1.574120114756  |
| C | 4.383697139463  | -0.417995403802 | -0.875639606184 |
| N | 3.794287603256  | -0.193184506252 | 0.448326102822  |
| C | 3.431383792367  | -1.215463389114 | -1.790835463094 |
| C | 4.304306981015  | 1.010615062537  | 1.090880294043  |
| O | 9.530256592628  | -2.852754047868 | -0.938373146708 |
| O | 8.640498410930  | -1.538490381587 | -3.061033551750 |
| C | 10.071567076572 | -3.557183438429 | 0.170312558419  |
| C | 2.093663488529  | -0.503362288495 | -2.036837262201 |
| C | 1.175063423426  | -1.292500065315 | -2.937811441398 |
| C | 0.277359701364  | -2.224677144414 | -2.405134467018 |
| C | 1.216885771761  | -1.128167866173 | -4.327109640564 |
| C | 0.399039103381  | -1.885623004563 | -5.165316386716 |
| C | -0.478994036512 | -2.841931140496 | -4.628895640809 |
| C | -0.543133928111 | -2.990932911274 | -3.233714697083 |
| O | 0.512196014546  | -1.732302119818 | -6.526175254340 |
| O | -1.283775829706 | -3.594701729372 | -5.446994685132 |
| O | -1.361043272389 | -3.937349459269 | -2.666797460779 |

|   |                 |                 |                 |
|---|-----------------|-----------------|-----------------|
| C | -2.759128402640 | -3.640995467937 | -2.723892481659 |
| C | -0.650821099621 | -4.771974114246 | -5.958946939571 |
| C | -0.587480385614 | -1.060317724577 | -7.146851490002 |
| H | 7.808332410908  | -2.880151841708 | 1.206621964336  |
| H | 6.275526901009  | -0.479856952986 | -2.846601291733 |
| H | 3.383083397866  | -1.186045976699 | 2.236729438189  |
| H | 3.385421687687  | -2.203549679899 | 0.801471470256  |
| H | 5.379426026629  | -2.798034864073 | 2.011308341278  |
| H | 5.800088506737  | -1.126068924411 | 2.332801596704  |
| H | 4.499614696636  | 0.574939748989  | -1.333500426442 |
| H | 3.249925853105  | -2.211694042672 | -1.366533779621 |
| H | 3.936111437698  | -1.383793128560 | -2.750565376948 |
| H | 4.054344374715  | 1.883917916377  | 0.477887632650  |
| H | 3.818059912416  | 1.132970056690  | 2.065576992951  |
| H | 5.397562980373  | 1.013600937983  | 1.251376151315  |
| H | 9.464000066752  | -2.017698872730 | -2.863890509943 |
| H | 11.053148402760 | -3.909911695183 | -0.148813213717 |
| H | 10.182366609437 | -2.895909463663 | 1.037943444561  |
| H | 9.441205173872  | -4.414314672539 | 0.435318588599  |
| H | 2.290883625942  | 0.480518516852  | -2.484125618902 |
| H | 1.608847452447  | -0.321859470617 | -1.071421824334 |
| H | 0.204818276199  | -2.372847995265 | -1.329908665342 |
| H | 1.890770329512  | -0.405098710034 | -4.781515755331 |
| H | -3.267040334230 | -4.475286353294 | -2.235365648089 |
| H | -2.974947485239 | -2.712453219060 | -2.180321248028 |
| H | -3.101097227881 | -3.555085621379 | -3.759998633842 |
| H | -1.392427350810 | -5.270012629232 | -6.587211698342 |
| H | 0.226487796231  | -4.510105073144 | -6.561027243830 |
| H | -0.354593025201 | -5.438216440715 | -5.140130599453 |
| H | -0.362283445915 | -1.029342106205 | -8.214986584548 |
| H | -1.524115812458 | -1.602685112898 | -6.982219350837 |
| H | -0.676150568997 | -0.036639792808 | -6.761613704913 |

#### 14-rc.xyz

57

-1285.97184395

|   |                |                 |                 |
|---|----------------|-----------------|-----------------|
| C | 6.199917435277 | -1.770842086152 | 0.264547941027  |
| C | 7.406907161334 | -2.489847818701 | 0.289357422868  |
| C | 8.290787564186 | -2.422520197534 | -0.777579663191 |
| C | 7.977464342089 | -1.620847950041 | -1.905709501691 |
| C | 6.777890366697 | -0.928394235851 | -1.945566160030 |
| C | 5.875571575405 | -1.026077212220 | -0.881141352314 |
| C | 3.932785958471 | -1.170881468861 | 1.226165446785  |
| C | 5.336362656068 | -1.758276670377 | 1.496935365411  |
| C | 4.518806301562 | -0.335041018863 | -1.016633666970 |
| N | 4.067698130991 | -0.046172668122 | 0.335096153810  |
| C | 3.510335835362 | -1.165893148718 | -1.833516162814 |
| C | 3.993354526629 | 1.292966391417  | 0.861883364616  |
| O | 9.481325720785 | -3.055071437970 | -0.874970269705 |
| O | 8.833848897813 | -1.552597612771 | -2.946950305938 |
| C | 9.893506709627 | -3.912711531093 | 0.188595168593  |
| C | 2.135678069980 | -0.496400258187 | -1.971029556051 |
| C | 1.215599339323 | -1.286063914465 | -2.871894903576 |

|   |                 |                 |                 |
|---|-----------------|-----------------|-----------------|
| C | 0.414868230490  | -2.309789452598 | -2.355202771320 |
| C | 1.168160206349  | -1.023069193455 | -4.244695784401 |
| C | 0.356621630447  | -1.778981738358 | -5.090886354195 |
| C | -0.421079317249 | -2.830330653859 | -4.575834737009 |
| C | -0.399118481074 | -3.074261800804 | -3.192012365604 |
| O | 0.389024437116  | -1.524977504429 | -6.438104981366 |
| O | -1.212373451460 | -3.586142082979 | -5.400967268343 |
| O | -1.116096145507 | -4.109807392584 | -2.650138757798 |
| C | -2.536063049961 | -3.926957633721 | -2.635025326273 |
| C | -0.533766748105 | -4.692311190361 | -6.007587617706 |
| C | -0.807618559240 | -0.955771908444 | -6.980803195395 |
| H | 7.654852292439  | -3.076237376010 | 1.168677355547  |
| H | 6.540175387794  | -0.345755635588 | -2.831497048347 |
| H | 3.457542941602  | -0.846784236975 | 2.153419999581  |
| H | 3.297572677544  | -1.924150098456 | 0.749357970898  |
| H | 5.228769876126  | -2.762193053549 | 1.921711429135  |
| H | 5.809489232316  | -1.135533289958 | 2.267606731796  |
| H | 4.658299870637  | 0.629480920547  | -1.514715239462 |
| H | 3.412229154310  | -2.170948673833 | -1.406388429016 |
| H | 3.958598433107  | -1.299864076867 | -2.824861795831 |
| H | 4.256929688057  | 2.020152902056  | 0.095005263102  |
| H | 2.970826936374  | 1.482767878814  | 1.215044611954  |
| H | 4.666566248595  | 1.393272643268  | 1.723490421808  |
| H | 9.595679034315  | -2.130485763823 | -2.759616282369 |
| H | 10.854922711071 | -4.322990774587 | -0.119286981963 |
| H | 10.012757544238 | -3.344195809725 | 1.117049122267  |
| H | 9.170905970610  | -4.723484063565 | 0.330517266217  |
| H | 2.267181160565  | 0.516352874922  | -2.373147344216 |
| H | 1.674636844558  | -0.387427390389 | -0.980773747396 |
| H | 0.411742438722  | -2.533878387768 | -1.290780264592 |
| H | 1.763961419679  | -0.224718827204 | -4.681144547735 |
| H | -2.952734385578 | -4.830690307755 | -2.185889182395 |
| H | -2.800800798099 | -3.056984485293 | -2.021122928805 |
| H | -2.927483600196 | -3.802560121184 | -3.649030071189 |
| H | -1.268720962498 | -5.189307164905 | -6.643901904459 |
| H | 0.307082693438  | -4.344174901449 | -6.617751131655 |
| H | -0.175800061471 | -5.390835869077 | -5.242480251068 |
| H | -0.619688097785 | -0.817123375931 | -8.047297595490 |
| H | -1.661477752421 | -1.624941550710 | -6.838618157166 |
| H | -1.010934647384 | 0.016466244784  | -6.515005930350 |

## 15.xyz

44

-1165.82101694

|   |                 |                 |                |
|---|-----------------|-----------------|----------------|
| C | -0.765840964678 | -2.204076728886 | 5.018418839427 |
| C | -2.145821608956 | -2.123065559721 | 5.197610064212 |
| C | -2.930780125795 | -3.289090015669 | 5.107987651265 |
| C | -2.315904188687 | -4.501009177972 | 4.795283569573 |
| C | -0.937895587592 | -4.573206499137 | 4.603780940790 |
| C | -0.142230711030 | -3.424682551292 | 4.722567486772 |
| C | 1.321752366590  | -3.525887663642 | 4.595970781895 |
| N | 3.418215756229  | -4.313861972325 | 5.016690852778 |
| C | 2.142077437375  | -4.487755484558 | 5.252340574424 |

|   |                 |                 |                 |
|---|-----------------|-----------------|-----------------|
| C | 2.238540455603  | -2.750357256807 | 3.918901043677  |
| O | 3.484679047803  | -3.217997444120 | 4.171474559238  |
| C | 2.166848631589  | -1.613691290131 | 3.001653753434  |
| C | 1.049686254539  | -1.427728210972 | 2.174026033728  |
| C | 3.237908926042  | -0.710859330341 | 2.912551522112  |
| C | 3.193480502731  | 0.337192996190  | 1.999359863287  |
| C | 2.092483911999  | 0.509849244205  | 1.159097768212  |
| C | 0.997988709550  | -0.371428121711 | 1.268043136716  |
| O | -2.693304240877 | -0.911568540954 | 5.535180263992  |
| O | -4.291596281525 | -3.253194112749 | 5.278596488045  |
| O | -0.099402552110 | -0.263000595373 | 0.453834676839  |
| O | 2.086828470508  | 1.562287541677  | 0.283622487282  |
| C | -3.554535402124 | -0.331723605284 | 4.548928329295  |
| C | -4.721758787438 | -3.075820224043 | 6.633365922634  |
| C | 2.191333407795  | 1.204393106086  | -1.100795896527 |
| C | -0.917189979891 | 0.891589667816  | 0.679244215400  |
| H | -0.181000415472 | -1.294650217689 | 5.127781373262  |
| H | -2.935448013190 | -5.390308339409 | 4.713667420516  |
| H | -0.479240972532 | -5.528232034481 | 4.360221652966  |
| H | 1.828672415590  | -5.288858977422 | 5.911807361189  |
| H | 0.206160331688  | -2.110365200487 | 2.211746644609  |
| H | 4.106512882557  | -0.832433181259 | 3.552244833449  |
| H | 4.022277480453  | 1.034923178318  | 1.915154459426  |
| H | -3.905338106265 | 0.611518965935  | 4.971949659959  |
| H | -2.996177312802 | -0.134774681352 | 3.626137425481  |
| H | -4.406968882768 | -0.983504725800 | 4.334981116356  |
| H | -5.812994502993 | -3.060391953079 | 6.605797274743  |
| H | -4.381646216490 | -3.914333761301 | 7.253217910144  |
| H | -4.347666421688 | -2.133183398319 | 7.045988179035  |
| H | 2.165131524555  | 2.142990324939  | -1.657202787206 |
| H | 3.142361175548  | 0.691770655401  | -1.287983972401 |
| H | 1.357364980519  | 0.565935411914  | -1.408348790618 |
| H | -1.747129299058 | 0.814661463797  | -0.025485493219 |
| H | -1.304024572346 | 0.887486437198  | 1.705017357258  |
| H | -0.358784123630 | 1.814984113242  | 0.497755001268  |

### 15-rc.xyz

44

-1165.61339718

|   |                 |                 |                |
|---|-----------------|-----------------|----------------|
| C | -0.771573987222 | -2.371959025379 | 4.872296860120 |
| C | -2.131565192072 | -2.317833172364 | 5.140976210239 |
| C | -2.872732109890 | -3.552332217666 | 5.285069107314 |
| C | -2.172294818671 | -4.782010851289 | 5.212589770793 |
| C | -0.823515963086 | -4.811556546440 | 4.985770156109 |
| C | -0.091886336706 | -3.600066434932 | 4.782911517993 |
| C | 1.328828501862  | -3.669218191706 | 4.550660370636 |
| N | 3.467827916140  | -4.385160210167 | 4.845872519816 |
| C | 2.217733730589  | -4.655127143881 | 5.088333640129 |
| C | 2.198570994407  | -2.789665377022 | 3.897477739692 |
| O | 3.457162112443  | -3.216429400969 | 4.081975451465 |
| C | 2.042141346287  | -1.634647142883 | 3.033796948234 |
| C | 0.947939152370  | -1.533442407985 | 2.156830586479 |
| C | 3.035959513530  | -0.637194410107 | 3.007685530600 |

|   |                 |                 |                 |
|---|-----------------|-----------------|-----------------|
| C | 2.935738796201  | 0.416503469160  | 2.115248461010  |
| C | 1.871938989552  | 0.495452281690  | 1.204595621377  |
| C | 0.847577604016  | -0.479546805767 | 1.256260073210  |
| O | -2.826594917082 | -1.194105207854 | 5.310953798591  |
| O | -4.164878279998 | -3.672049795340 | 5.501380366077  |
| O | -0.213237839050 | -0.451575719832 | 0.392590811655  |
| O | 1.878997132875  | 1.540689990552  | 0.346343534185  |
| C | -2.148385046963 | 0.067716966416  | 5.283339151159  |
| C | -5.130294826589 | -2.599879988631 | 5.558101932384  |
| C | 1.636678885160  | 1.300519704092  | -1.050648494033 |
| C | -1.194294860778 | 0.556125216616  | 0.669417758357  |
| H | -0.211121194447 | -1.449797614274 | 4.781385256107  |
| H | -2.747543819549 | -5.693919379758 | 5.334642299293  |
| H | -0.314207478457 | -5.766876341298 | 4.916245571524  |
| H | 1.976130357793  | -5.522473174650 | 5.690826659476  |
| H | 0.173901776595  | -2.294741431958 | 2.134303380748  |
| H | 3.883920101209  | -0.695769148590 | 3.682630628660  |
| H | 3.701048989526  | 1.186004702804  | 2.075578823036  |
| H | -2.924505883704 | 0.813119313293  | 5.450028082346  |
| H | -1.403652822495 | 0.113353485743  | 6.083829773369  |
| H | -1.676774045214 | 0.228307484569  | 4.309940284538  |
| H | -6.084448560276 | -3.112640791339 | 5.669320074430  |
| H | -4.931893050512 | -1.961066846251 | 6.418899701582  |
| H | -5.107529993589 | -2.021671875940 | 4.633754334238  |
| H | 2.047345035222  | 2.170438853856  | -1.565004562366 |
| H | 2.159935955804  | 0.396291276464  | -1.375578284273 |
| H | 0.570575123177  | 1.209648883428  | -1.267170229368 |
| H | -1.921966203711 | 0.500090934028  | -0.141697597406 |
| H | -1.691797906649 | 0.351690295284  | 1.624027572125  |
| H | -0.745631478716 | 1.555346046711  | 0.696390363062  |

## 16.xyz

100

-1784.87122109

|   |                 |                 |                 |
|---|-----------------|-----------------|-----------------|
| C | 2.787537734240  | -7.553705191105 | -0.459692104781 |
| C | 1.688131337512  | -8.318439021095 | -0.054718814878 |
| C | 0.938419409609  | -7.958616837848 | 1.064488075486  |
| C | 1.237771970283  | -6.825130098628 | 1.830880895112  |
| C | 2.331996209180  | -6.024641828184 | 1.424191778401  |
| C | 3.076697976595  | -6.412995331043 | 0.301998501595  |
| C | 0.421807621894  | -6.555086311610 | 3.044258353417  |
| C | 2.708982896784  | -4.752230002435 | 2.098086480032  |
| C | 3.648876668447  | -7.901657822991 | -1.680108477228 |
| C | 1.009961422726  | -6.366748906884 | 4.304697574419  |
| C | 0.228902917450  | -6.176084952210 | 5.440031162028  |
| C | -1.175557024991 | -6.157956533739 | 5.381085989490  |
| C | -1.755909310808 | -6.345237738957 | 4.120569544056  |
| C | -0.976283151007 | -6.543385480798 | 2.978360476376  |
| C | 4.038262486029  | -4.508128640148 | 2.471476450213  |
| C | 1.769073307666  | -3.733633515028 | 2.320650753263  |
| C | 2.145651384869  | -2.519005869585 | 2.884958984419  |
| C | 3.475944403481  | -2.274867975537 | 3.260662429987  |
| C | 4.413152030169  | -3.295828860867 | 3.048927758054  |

|   |                 |                  |                 |
|---|-----------------|------------------|-----------------|
| C | 3.875355014918  | -1.000401786886  | 3.917502864867  |
| C | 3.563831514741  | 0.274046026584   | 3.385950564942  |
| C | 4.551794933710  | -1.078165095785  | 5.142569300495  |
| C | 4.925946307236  | 0.047247489318   | 5.890008876127  |
| C | 4.587374710004  | 1.296753457034   | 5.359125287387  |
| C | 3.925269875733  | 1.399952098767   | 4.136408040857  |
| C | 2.918972126166  | 0.481134380145   | 2.062187446193  |
| C | 1.728046384945  | 0.982597897509   | -0.487298100191 |
| C | 2.841119347114  | 0.135557906381   | -0.345211469561 |
| C | 3.422493508257  | -0.112185660494  | 0.893927199733  |
| C | 1.815253950173  | 1.331381032359   | 1.927626324254  |
| C | 1.231576221964  | 1.572686382397   | 0.681440952641  |
| C | 1.117440346525  | 1.225860932111   | -1.873235303945 |
| C | 5.655113793166  | -0.126728038046  | 7.228393858344  |
| C | -1.998282353827 | -5.950643224870  | 6.658746120280  |
| C | 3.569999623412  | -6.754686170634  | -2.708031645584 |
| C | 5.114474948149  | -8.090156682105  | -1.239412444391 |
| C | 3.185574112165  | -9.193973522985  | -2.367638632005 |
| C | -0.089116676961 | 2.173652197532   | -1.821603694690 |
| C | 0.650277421804  | -0.116364675159  | -2.471642278040 |
| C | 2.180887763019  | 1.851488922043   | -2.798511191662 |
| C | 5.991719451182  | 1.219465033840   | 7.885353728717  |
| C | 6.972979822683  | -0.894119863975  | 7.000960037099  |
| C | 4.761882671161  | -0.925712887390  | 8.199104537227  |
| C | -3.508997759852 | -5.945034015219  | 6.385692399616  |
| C | -1.620981981554 | -4.601040520109  | 7.302556437671  |
| C | -1.693392246318 | -7.090235947097  | 7.652244457002  |
| H | 1.405146243515  | -9.214455989890  | -0.598490321632 |
| H | 0.111415155801  | -8.595129393869  | 1.372251297760  |
| H | 3.898708916737  | -5.766600651263  | 0.002702410690  |
| H | 2.093064843460  | -6.382239833807  | 4.399511416155  |
| H | 0.733881841863  | -6.043799852877  | 6.394186704152  |
| H | -2.835747560364 | -6.337468280732  | 4.007608020837  |
| H | -1.468463399672 | -6.676521554349  | 2.016896280700  |
| H | 4.788560077987  | -5.281047071029  | 2.318341690294  |
| H | 0.731078301258  | -3.891423556736  | 2.039285420225  |
| H | 1.394801451647  | -1.748622671523  | 3.041332937789  |
| H | 5.453051972419  | -3.135190702296  | 3.325645693413  |
| H | 4.761612832236  | -2.071149454823  | 5.533825856339  |
| H | 4.845281027329  | 2.210664997000   | 5.884967650856  |
| H | 3.708658836556  | 2.387804009556   | 3.735122488536  |
| H | 3.274030839795  | -0.343508034720  | -1.220510077353 |
| H | 4.287841624635  | -0.767748557485  | 0.954570387901  |
| H | 1.391083023442  | 1.802896900722   | 2.812030383637  |
| H | 0.371314194256  | 2.233754912723   | 0.639090269089  |
| H | 4.186193160685  | -6.989900483328  | -3.585047879122 |
| H | 3.929957930902  | -5.807370550705  | -2.291763077232 |
| H | 2.538424755484  | -6.603036353509  | -3.047817362422 |
| H | 5.741159142018  | -8.334871309784  | -2.106243878898 |
| H | 5.203962952293  | -8.907046907933  | -0.513244681640 |
| H | 5.522726304948  | -7.183642040914  | -0.779203436911 |
| H | 3.833459888383  | -9.403558659929  | -3.226877712737 |
| H | 3.240167767644  | -10.057863065170 | -1.694309891240 |
| H | 2.158056759845  | -9.113516203025  | -2.742183421244 |

|   |                 |                 |                 |
|---|-----------------|-----------------|-----------------|
| H | -0.484997428447 | 2.316574973632  | -2.834005291971 |
| H | -0.900827622143 | 1.770601113518  | -1.204095649120 |
| H | 0.182520065385  | 3.161763365196  | -1.431157411253 |
| H | 0.211982034070  | 0.044448621415  | -3.464758155441 |
| H | -0.109852674141 | -0.585823787095 | -1.835783369746 |
| H | 1.479276076980  | -0.823837624631 | -2.582958754645 |
| H | 1.760493377760  | 2.021682836383  | -3.797801475919 |
| H | 3.055635305527  | 1.201658177753  | -2.911020353009 |
| H | 2.524995580296  | 2.815746653057  | -2.405499979974 |
| H | 6.517029378099  | 1.042942202201  | 8.831308219299  |
| H | 6.646524987643  | 1.831252485665  | 7.253247751791  |
| H | 5.090432687757  | 1.801281003762  | 8.112579418285  |
| H | 7.503438948076  | -1.025154763093 | 7.952588541936  |
| H | 7.632598424446  | -0.347076442713 | 6.316658581048  |
| H | 6.798280360028  | -1.889291820881 | 6.577520883575  |
| H | 5.271161080459  | -1.053893215804 | 9.162619960896  |
| H | 4.526531899664  | -1.922869061639 | 7.810909846700  |
| H | 3.815486399359  | -0.402591288385 | 8.381362022707  |
| H | -4.050129339072 | -5.794621979304 | 7.327258642271  |
| H | -3.799109882006 | -5.135737810954 | 5.704891613590  |
| H | -3.851457163339 | -6.894621215474 | 5.957269151405  |
| H | -2.204091037066 | -4.443048392692 | 8.218684427546  |
| H | -1.828501994501 | -3.768642595204 | 6.619517185967  |
| H | -0.559889936661 | -4.558654998834 | 7.571970843058  |
| H | -2.270646533247 | -6.952655622877 | 8.575321373428  |
| H | -0.632358374193 | -7.121712601302 | 7.923513581263  |
| H | -1.961478305918 | -8.064287182994 | 7.225547812666  |

## 16-rc.xyz

100

SCF = -1784.65658213

|   |                 |                 |                 |
|---|-----------------|-----------------|-----------------|
| C | 3.031291725605  | -7.665074237676 | -0.359753247534 |
| C | 1.795349285799  | -8.294023165865 | -0.110350791225 |
| C | 0.940058052315  | -7.845882161453 | 0.888635285790  |
| C | 1.260183160288  | -6.747074148013 | 1.696763298473  |
| C | 2.483491614250  | -6.058424516440 | 1.423574480146  |
| C | 3.345022590748  | -6.559266570548 | 0.429431506537  |
| C | 0.383470024153  | -6.417042240493 | 2.832549613723  |
| C | 2.846381288489  | -4.797651753069 | 2.075842161982  |
| C | 3.995275165362  | -8.129995157194 | -1.455977113387 |
| C | 0.904287441518  | -6.152684236063 | 4.116311299780  |
| C | 0.062192451915  | -5.894891178866 | 5.188691147854  |
| C | -1.337217054055 | -5.875328743758 | 5.044170800869  |
| C | -1.849653347285 | -6.143515839668 | 3.763135201805  |
| C | -1.014366694678 | -6.421203540391 | 2.686125049593  |
| C | 4.191988227540  | -4.539787391314 | 2.440186717789  |
| C | 1.892240290256  | -3.775419447072 | 2.301922284788  |
| C | 2.263507772403  | -2.562701083710 | 2.845484348885  |
| C | 3.601476576904  | -2.317330297247 | 3.240627033053  |
| C | 4.551374397124  | -3.350077469436 | 3.038696362578  |
| C | 3.988953668017  | -1.070854010707 | 3.906359558049  |
| C | 3.473695803490  | 0.205490246538  | 3.519075382361  |
| C | 4.834343268534  | -1.156976520285 | 5.028278657813  |



|   |                 |                  |                 |
|---|-----------------|------------------|-----------------|
| C | 5.139920285369  | -0.060778927595  | 5.833849656545  |
| C | 4.573834086467  | 1.176078064779   | 5.466300232382  |
| C | 3.767816832434  | 1.300934942793   | 4.341257553538  |
| C | 2.741706266631  | 0.428777402242   | 2.261320959470  |
| C | 1.364850092914  | 0.939026824464   | -0.185353528413 |
| C | 2.507453337595  | 0.119434746708   | -0.141746815711 |
| C | 3.178476857114  | -0.136629054116  | 1.045377550676  |
| C | 1.615276567417  | 1.268094880440   | 2.221215359355  |
| C | 0.938282245772  | 1.503708028418   | 1.028898630565  |
| C | 0.649282037257  | 1.187450462167   | -1.515251267110 |
| C | 6.030662438198  | -0.235538242636  | 7.068852748565  |
| C | -2.231170003652 | -5.583518703300  | 6.251809712019  |
| C | 4.156119314001  | -7.005465169832  | -2.500173385505 |
| C | 5.367949629807  | -8.446354238358  | -0.828358847485 |
| C | 3.491621963168  | -9.389595353091  | -2.174951157559 |
| C | -0.572894446173 | 2.103385599776   | -1.360795462407 |
| C | 0.174784711210  | -0.161057985493  | -2.095674224442 |
| C | 1.630567924751  | 1.851528151224   | -2.504095110636 |
| C | 6.262077571875  | 1.088944133226   | 7.809450196104  |
| C | 7.400980799458  | -0.793682389507  | 6.633910291044  |
| C | 5.359417156795  | -1.225261751849  | 8.043677119262  |
| C | -3.722761502696 | -5.589131199388  | 5.890622009404  |
| C | -1.877049779418 | -4.195195483187  | 6.824749633542  |
| C | -1.990152821501 | -6.659019725089  | 7.332134148320  |
| H | 1.500188697301  | -9.165816888431  | -0.684703903847 |
| H | 0.025841047451  | -8.398731931541  | 1.087200119372  |
| H | 4.261318104509  | -6.010093745809  | 0.232027216616  |
| H | 1.978075370398  | -6.187451397178  | 4.279241935429  |
| H | 0.510140345168  | -5.714911527716  | 6.162400334449  |
| H | -2.920906299338 | -6.134980477314  | 3.591071021368  |
| H | -1.452473746310 | -6.609031554561  | 1.708861454692  |
| H | 4.945708516031  | -5.306528954042  | 2.285359293333  |
| H | 0.858427205244  | -3.934490026137  | 2.013903211447  |
| H | 1.510457263771  | -1.797593149648  | 3.002490350609  |
| H | 5.587367017379  | -3.189176636044  | 3.322856252737  |
| H | 5.201617438276  | -2.139595501662  | 5.309868863167  |
| H | 4.781742802431  | 2.066878667901   | 6.049657821869  |
| H | 3.403213329242  | 2.285158198374   | 4.059287981533  |
| H | 2.892088171694  | -0.324098138715  | -1.056294126233 |
| H | 4.073804933891  | -0.752183760956  | 1.029125609470  |
| H | 1.242124161732  | 1.712188645425   | 3.140960725905  |
| H | 0.058945792923  | 2.138632849083   | 1.055968889929  |
| H | 4.842253820799  | -7.328361490375  | -3.292302217230 |
| H | 4.564669539136  | -6.090558397981  | -2.057096083063 |
| H | 3.193786288123  | -6.757813937020  | -2.963234016817 |
| H | 6.065119969768  | -8.779373068793  | -1.606518716224 |
| H | 5.285135112664  | -9.244622763087  | -0.081506699630 |
| H | 5.809530800378  | -7.570377350649  | -0.340931093891 |
| H | 4.221531077893  | -9.688387610560  | -2.935552125934 |
| H | 3.369734490870  | -10.234275438486 | -1.486483393571 |
| H | 2.537003745860  | -9.218766706894  | -2.686437804014 |
| H | -1.045554134791 | 2.246216813112   | -2.339260802985 |
| H | -1.326886918815 | 1.672584771852   | -0.691271111047 |
| H | -0.298070954233 | 3.094450613960   | -0.980741715486 |

|   |                 |                 |                 |
|---|-----------------|-----------------|-----------------|
| H | -0.339571888492 | 0.004156909035  | -3.050219928978 |
| H | -0.525196811284 | -0.657829260573 | -1.413459100100 |
| H | 1.010688778638  | -0.844369589809 | -2.280728357583 |
| H | 1.128643099350  | 2.032245510836  | -3.462334485964 |
| H | 2.505158547906  | 1.221636503334  | -2.699646476768 |
| H | 1.985426765666  | 2.814705618698  | -2.119014216568 |
| H | 6.907279173378  | 0.910373669375  | 8.676931881592  |
| H | 6.761365404257  | 1.832021273055  | 7.176359941614  |
| H | 5.325603044511  | 1.521486734703  | 8.180687076074  |
| H | 8.045443904428  | -0.922179121839 | 7.511808312305  |
| H | 7.903225177802  | -0.108258382560 | 5.941217340137  |
| H | 7.311212090919  | -1.768283686634 | 6.141885516442  |
| H | 5.985472740623  | -1.352543104648 | 8.934946874889  |
| H | 5.217973554331  | -2.213549459323 | 7.592481322004  |
| H | 4.379044785561  | -0.855829022201 | 8.366550332337  |
| H | -4.314697797067 | -5.370337806660 | 6.786494024345  |
| H | -3.965813216486 | -4.826506981002 | 5.141190319427  |
| H | -4.049541808395 | -6.564363771775 | 5.510929353542  |
| H | -2.506897857155 | -3.979678122839 | 7.696458106683  |
| H | -2.046513072846 | -3.408036036267 | 6.080497222487  |
| H | -0.831755552203 | -4.137576475388 | 7.146980129138  |
| H | -2.624259431910 | -6.459729190822 | 8.204583425251  |
| H | -0.949140779065 | -6.673160150913 | 7.672565671204  |
| H | -2.236970795640 | -7.657872296375 | 6.953469470429  |

## 17.xyz

40

-923.066663518

|   |                 |                 |                 |
|---|-----------------|-----------------|-----------------|
| C | -1.062040930956 | -1.899054674323 | -3.247814771368 |
| C | -1.941690569438 | -1.012492399063 | -3.860909919791 |
| C | -1.877119231647 | 0.346669495497  | -3.550635329901 |
| C | -0.940320482425 | 0.795372287405  | -2.624921287435 |
| C | -0.046983888967 | -0.085847652647 | -1.992170833833 |
| C | -0.106078290773 | -1.463552833710 | -2.314100385279 |
| C | 0.762780535586  | -2.490925461452 | -1.672062710804 |
| C | 0.953345685294  | 0.491168418729  | -1.049271228833 |
| C | 2.257752691004  | -4.416772567011 | -1.806812223791 |
| C | 1.500667787265  | -3.422561486793 | -2.431054319623 |
| C | 0.821319056409  | -2.606670646024 | -0.274057415059 |
| C | 1.572350987167  | -3.598246631676 | 0.352804748499  |
| C | 2.295447771472  | -4.510382910995 | -0.417193449704 |
| C | 2.326719499649  | 0.268639855639  | -1.237129655903 |
| C | 0.572116237754  | 1.330050010518  | 0.018098571350  |
| C | 1.531071695054  | 1.910840610749  | 0.851377072828  |
| C | 2.887981976015  | 1.674832137341  | 0.640677193696  |
| C | 3.286681380414  | 0.847940789526  | -0.410552681563 |
| O | 1.462033458922  | -3.427323870174 | -3.808934044584 |
| O | -0.747722654131 | 1.654708352210  | 0.247851216957  |
| C | 2.265232820688  | -2.435969413291 | -4.446686984204 |
| C | -1.515952593642 | 0.653013882758  | 0.912088551521  |
| H | -1.115164127156 | -2.957870297562 | -3.483621868508 |
| H | -2.673865887412 | -1.381712237944 | -4.574985089030 |
| H | -2.550669050780 | 1.054613037756  | -4.027523373689 |

|   |                 |                 |                 |
|---|-----------------|-----------------|-----------------|
| H | -0.884038172443 | 1.853657681272  | -2.387285948734 |
| H | 2.808554589192  | -5.115046909133 | -2.431808337414 |
| H | 0.250998127525  | -1.908186770012 | 0.331737278109  |
| H | 1.585779391875  | -3.661276201169 | 1.437949855364  |
| H | 2.882996628837  | -5.291569291203 | 0.058798471848  |
| H | 2.645254245836  | -0.363061114124 | -2.061583733473 |
| H | 1.191627267561  | 2.552447870222  | 1.660521555015  |
| H | 3.626904440191  | 2.136136833164  | 1.291234627313  |
| H | 4.341643487013  | 0.659311478587  | -0.592738378058 |
| H | 2.162504735883  | -2.602266386352 | -5.521097062869 |
| H | 1.917899107598  | -1.424663546845 | -4.204070821203 |
| H | 3.318326586647  | -2.545288893189 | -4.157608561190 |
| H | -2.510351691072 | 1.078338342403  | 1.063304298891  |
| H | -1.601225668279 | -0.253964048980 | 0.301843863098  |
| H | -1.071406945558 | 0.404847976003  | 1.884356590049  |

### 17-rc.xyz

40

SCF = -922.85989943

|   |                 |                 |                 |
|---|-----------------|-----------------|-----------------|
| C | -0.802688086190 | -1.750910923836 | -3.634471151462 |
| C | -1.824582352373 | -0.927873772145 | -4.073001833898 |
| C | -2.080513993864 | 0.293183927519  | -3.422393207091 |
| C | -1.310645019804 | 0.680776804325  | -2.340300266763 |
| C | -0.245050917190 | -0.123982458352 | -1.888637265280 |
| C | -0.018565450717 | -1.394971251254 | -2.518225417032 |
| C | 0.903855514116  | -2.368402631774 | -1.932634575375 |
| C | 0.692065267842  | 0.402033866275  | -0.895440192727 |
| C | 2.611002392697  | -4.126189452199 | -2.148265671865 |
| C | 1.794900401215  | -3.154997869808 | -2.739695543026 |
| C | 0.887911517672  | -2.610566713217 | -0.539601305493 |
| C | 1.685843752090  | -3.581800098841 | 0.035015291598  |
| C | 2.551441244133  | -4.335357343715 | -0.775586376820 |
| C | 2.085197368709  | 0.328014409974  | -1.123667730227 |
| C | 0.241408736876  | 1.069328486812  | 0.293975954048  |
| C | 1.166557489429  | 1.631085843115  | 1.181579689262  |
| C | 2.526118286086  | 1.544276351811  | 0.907713534361  |
| C | 2.992131076941  | 0.895081925272  | -0.248123398484 |
| O | 1.823600052898  | -2.853294096128 | -4.042960566865 |
| O | -1.079561116927 | 1.057429162198  | 0.506128096828  |
| C | 2.707754276770  | -3.563054114696 | -4.914066617220 |
| C | -1.610442450239 | 1.659531625947  | 1.689577825788  |
| H | -0.639954314715 | -2.709370684405 | -4.114070022440 |
| H | -2.444264229727 | -1.236503950564 | -4.910275699872 |
| H | -2.871762184553 | 0.944463574199  | -3.782993412298 |
| H | -1.485429393496 | 1.642620174405  | -1.871374011853 |
| H | 3.292062651617  | -4.714931507008 | -2.751688782052 |
| H | 0.190052337748  | -2.051453569285 | 0.075597532282  |
| H | 1.631631932359  | -3.772892770958 | 1.102294466033  |
| H | 3.183230082097  | -5.098475704591 | -0.329347277065 |
| H | 2.436633679995  | -0.140369139573 | -2.037625282295 |
| H | 0.831028869337  | 2.130395315693  | 2.083127217499  |
| H | 3.234493405456  | 1.991090270654  | 1.599963573977  |
| H | 4.055880079528  | 0.855707038964  | -0.461373618541 |

|   |                 |                 |                 |
|---|-----------------|-----------------|-----------------|
| H | 2.540684228821  | -3.136881097496 | -5.902705394240 |
| H | 3.748937350071  | -3.409018817504 | -4.613679650863 |
| H | 2.467447907465  | -4.630880904555 | -4.922694328661 |
| H | -2.688765312713 | 1.518166270115  | 1.625717641673  |
| H | -1.221308941585 | 1.158907777671  | 2.581920811817  |
| H | -1.374976131703 | 2.727968863060  | 1.718300443338  |

## 18.xyz

48

-1376.32569933

|   |                 |                 |                 |
|---|-----------------|-----------------|-----------------|
| C | -5.294524729374 | 2.036684989149  | 5.890443709022  |
| C | -5.359882275634 | 1.425808042654  | 7.173277860395  |
| C | -4.813736772237 | 0.182785039155  | 7.388467933240  |
| C | -4.177653559228 | -0.498276305153 | 6.320706049032  |
| C | -4.098104193263 | 0.066372348594  | 5.067312703269  |
| C | -4.651823334891 | 1.350654152186  | 4.807471668526  |
| C | -4.588176301445 | 1.959219355356  | 3.521960176899  |
| C | -5.144833283663 | 3.217140674578  | 3.326211844788  |
| C | -5.788537101277 | 3.905647003169  | 4.408280791004  |
| C | -5.849571209275 | 3.309534092570  | 5.656233974039  |
| C | -3.923661154406 | 1.271807625397  | 2.378853324511  |
| C | -4.652227075256 | 0.393884657674  | 1.526974250042  |
| C | -6.033989392478 | 0.118585764223  | 1.722968134685  |
| C | -6.710731068540 | -0.739232142057 | 0.885028037661  |
| C | -6.050983006139 | -1.373558574018 | -0.197062492596 |
| C | -4.715955163727 | -1.130282303835 | -0.416556716274 |
| C | -3.988272601020 | -0.249392631251 | 0.430569015542  |
| C | -2.620780759457 | 0.009584259581  | 0.215810318373  |
| C | -1.908891128706 | 0.863035309720  | 1.041259358959  |
| C | -2.574433567717 | 1.502017059268  | 2.140412727958  |
| C | -6.373795688211 | 5.238037975208  | 4.172118171064  |
| O | -5.067169926557 | 3.768083948617  | 2.098366659157  |
| O | -1.911514156023 | 2.335626922704  | 2.966739637506  |
| C | -0.477262944135 | 1.128341573718  | 0.809597631695  |
| O | -6.343761247005 | 5.814234327166  | 3.081642148925  |
| O | -6.946548695713 | 5.779934993010  | 5.244544320589  |
| C | -7.534051095904 | 7.080872259703  | 5.074168575906  |
| O | 0.032645715374  | 0.492301813431  | -0.242700255264 |
| O | 0.201958155245  | 1.877614031946  | 1.516207290384  |
| C | 1.424575926685  | 0.719789218484  | -0.520994855180 |
| H | -5.851336010265 | 1.962835335388  | 7.981989957281  |
| H | -4.866443976588 | -0.278998839625 | 8.370898310002  |
| H | -3.746115955930 | -1.481246170871 | 6.494702319934  |
| H | -3.605884400491 | -0.469105723899 | 4.260135301662  |
| H | -6.337340800018 | 3.834376850458  | 6.472414119219  |
| H | -6.555094319269 | 0.597007791621  | 2.547608031335  |
| H | -7.767159661628 | -0.933299776930 | 1.055330004027  |
| H | -6.601884186504 | -2.047468882194 | -0.847854037243 |
| H | -4.193582534795 | -1.607911485510 | -1.242908664478 |
| H | -2.113369908869 | -0.472640867854 | -0.614615318022 |
| H | -5.505885086269 | 4.653693067955  | 2.145372951149  |
| H | -0.977120742022 | 2.386438138162  | 2.645372771421  |
| H | -8.320121455014 | 7.044523660241  | 4.316464062499  |

|   |                 |                |                 |
|---|-----------------|----------------|-----------------|
| H | -7.950845794778 | 7.334591762821 | 6.048296801444  |
| H | -6.769626525127 | 7.804868040405 | 4.782454496151  |
| H | 1.600144269082  | 1.778472061574 | -0.725777322629 |
| H | 1.640610763956  | 0.117380859605 | -1.402715966468 |
| H | 2.037012510453  | 0.398289889813 | 0.324564960482  |

### 18-rc.xyz

48

|   |                 |                 |                 |
|---|-----------------|-----------------|-----------------|
| C | -4.940528331632 | 2.187032867983  | 5.975664787951  |
| C | -4.728734781731 | 1.766984928654  | 7.306034653340  |
| C | -4.028260482296 | 0.601499854711  | 7.573518480267  |
| C | -3.543885530188 | -0.181368543085 | 6.510967448868  |
| C | -3.745115322683 | 0.206522342679  | 5.196794426936  |
| C | -4.417096705701 | 1.414860078141  | 4.892484376957  |
| C | -4.639836219107 | 1.839559482590  | 3.547033051173  |
| C | -5.426571878611 | 2.998724600782  | 3.306831281523  |
| C | -5.956342454646 | 3.755292322001  | 4.400774897967  |
| C | -5.698476543225 | 3.349546035719  | 5.694484142238  |
| C | -4.002611086059 | 1.173053967410  | 2.409779007471  |
| C | -4.764008780421 | 0.569438313625  | 1.362910115259  |
| C | -6.165162948739 | 0.392632100937  | 1.460279254353  |
| C | -6.878741311792 | -0.197659064786 | 0.430574140376  |
| C | -6.223502112482 | -0.662641315789 | -0.723093929035 |
| C | -4.846611087438 | -0.544360293525 | -0.827645718533 |
| C | -4.098346197867 | 0.060530023521  | 0.204544021019  |
| C | -2.686514312296 | 0.137541906904  | 0.127463182614  |
| C | -1.930644878950 | 0.682032342437  | 1.145690869003  |
| C | -2.585691479208 | 1.208979766139  | 2.304413364504  |
| C | -6.742908096191 | 4.973266162414  | 4.109314408177  |
| O | -5.589883331037 | 3.401525420211  | 2.057550373613  |
| O | -1.897111510018 | 1.805979693795  | 3.263190667553  |
| C | -0.456187691887 | 0.760816273019  | 1.063420304789  |
| O | -6.957966132176 | 5.368938962353  | 2.961100807991  |
| O | -7.193478764816 | 5.595549230858  | 5.184699985821  |
| C | -7.963744011994 | 6.796065035190  | 4.967443652120  |
| O | 0.051628994549  | 0.236344513693  | -0.038248360748 |
| O | 0.234649886502  | 1.271309555892  | 1.948507691409  |
| C | 1.486692923839  | 0.283250862288  | -0.180056541097 |
| H | -5.132055392013 | 2.365809017018  | 8.118547494455  |
| H | -3.869855536296 | 0.283732389173  | 8.599783177710  |
| H | -3.016948880984 | -1.107943536578 | 6.720662816188  |
| H | -3.396831783238 | -0.431736830264 | 4.390273046398  |
| H | -6.095097176050 | 3.932177361179  | 6.520612049777  |
| H | -6.683757680226 | 0.707537492143  | 2.360740928487  |
| H | -7.954800830522 | -0.314251165911 | 0.523305844459  |
| H | -6.792758119029 | -1.129819619464 | -1.521192326263 |
| H | -4.326244322047 | -0.926857294965 | -1.701926637804 |
| H | -2.184609134581 | -0.251727534150 | -0.753263589255 |
| H | -6.142093156641 | 4.236181326306  | 2.079945524740  |
| H | -0.928791441964 | 1.755739398868  | 3.014285347230  |
| H | -8.853550956319 | 6.566597309876  | 4.377947508836  |
| H | -8.237141560952 | 7.139749112234  | 5.963575654781  |
| H | -7.353450515079 | 7.541474731184  | 4.453718131309  |
| H | 1.827094464780  | 1.320538879507  | -0.179745957742 |

|   |                |                 |                 |
|---|----------------|-----------------|-----------------|
| H | 1.690916959848 | -0.191034621584 | -1.138429057648 |
| H | 1.959229791563 | -0.268752649232 | 0.634779972088  |

**19.xyz**

36

-920.716931798

|   |                 |                 |                 |
|---|-----------------|-----------------|-----------------|
| C | -2.425078383172 | -0.680207952635 | 1.526616666747  |
| C | -3.527436937497 | -0.824496917772 | 2.407503499273  |
| C | -4.515554193069 | 0.133868386018  | 2.468486505594  |
| C | -4.432812355651 | 1.280321401874  | 1.645134038323  |
| C | -3.374469191305 | 1.448769594177  | 0.777422493828  |
| C | -2.341733622911 | 0.477461073555  | 0.688117097072  |
| C | -1.230619067915 | 0.625066430930  | -0.205234207356 |
| C | -0.250882738736 | -0.360487253080 | -0.228047219047 |
| C | -0.331334344639 | -1.505203073855 | 0.602601977774  |
| C | -1.394657953372 | -1.656221403053 | 1.455200164242  |
| C | -1.098537821191 | 1.806885685270  | -1.107697101270 |
| C | -0.374258041304 | 2.979488335915  | -0.714576988777 |
| C | 0.247354423704  | 3.093241389245  | 0.557746156573  |
| C | 0.940784485476  | 4.232351603701  | 0.908567052753  |
| C | 1.049965839828  | 5.316927173251  | 0.008091083335  |
| C | 0.454696005231  | 5.238422139563  | -1.232123928287 |
| C | -0.266899175760 | 4.081264296048  | -1.622671447835 |
| C | -0.891203381556 | 3.985611390433  | -2.895674266848 |
| C | -1.588733162582 | 2.863136177983  | -3.262270517164 |
| C | -1.691508266219 | 1.772375927411  | -2.364306267808 |
| O | 0.837592145025  | -0.287625625280 | -1.038971879443 |
| O | -2.402278461331 | 0.700750686517  | -2.805029892944 |
| H | -3.578807967328 | -1.709951087872 | 3.038090175765  |
| H | -5.355982533590 | 0.013065727169  | 3.147206568827  |
| H | -5.211574695580 | 2.037519804085  | 1.697212029950  |
| H | -3.319447952153 | 2.335540371077  | 0.151326193427  |
| H | 0.460465573995  | -2.246829027511 | 0.546054361875  |
| H | -1.457503934746 | -2.535526293912 | 2.092612960426  |
| H | 0.168143003152  | 2.267017887203  | 1.259494350583  |
| H | 1.407595621314  | 4.297701674036  | 1.888531937698  |
| H | 1.600473417795  | 6.208573508310  | 0.297022632700  |
| H | 0.529992205000  | 6.067523591631  | -1.932973529887 |
| H | -0.810575781047 | 4.822517734635  | -3.585939893334 |
| H | -2.069384650752 | 2.785694555114  | -4.233405723264 |
| H | 0.794196456812  | 0.540515285845  | -1.550540043505 |
| H | -2.414142953791 | 0.022396948693  | -2.105615927212 |

**19-rc.xyz**

36

-920.499616233

|   |                 |                 |                |
|---|-----------------|-----------------|----------------|
| C | -2.497693406145 | -0.773469714179 | 1.440673278837 |
| C | -3.667920898892 | -1.105746537784 | 2.148167742264 |
| C | -4.770998242523 | -0.260704855248 | 2.134503223663 |
| C | -4.714621508993 | 0.951693445106  | 1.430956853822 |
| C | -3.569457603103 | 1.307936805531  | 0.734840873090 |
| C | -2.447388297874 | 0.442342223666  | 0.691178103903 |

|   |                 |                 |                 |
|---|-----------------|-----------------|-----------------|
| C | -1.250017287622 | 0.792899416615  | -0.018780892548 |
| C | -0.116514402241 | -0.057799439571 | 0.101090565078  |
| C | -0.176848429786 | -1.248914471314 | 0.856296321100  |
| C | -1.338003983192 | -1.600716787869 | 1.494777066231  |
| C | -1.201433454278 | 1.943414074406  | -0.922331891350 |
| C | -0.278813832037 | 3.022217049728  | -0.711487312647 |
| C | 0.465229993458  | 3.141480748910  | 0.489347711490  |
| C | 1.356594263736  | 4.187762365936  | 0.670996524462  |
| C | 1.510917496462  | 5.169836062768  | -0.319027442304 |
| C | 0.755595888832  | 5.105165937812  | -1.483785662770 |
| C | -0.146561873968 | 4.046740779204  | -1.698692586430 |
| C | -0.969358179414 | 3.995157112793  | -2.861826704893 |
| C | -1.885233450149 | 2.991790788466  | -3.047778410606 |
| C | -2.010628693476 | 1.960939152973  | -2.091333341712 |
| O | 1.033652387938  | 0.152977259546  | -0.545891748829 |
| O | -2.863718782741 | 0.982524045481  | -2.409330530589 |
| H | -3.694623471060 | -2.030338463060 | 2.719181230807  |
| H | -5.667492652556 | -0.529162335727 | 2.685518834431  |
| H | -5.565130128633 | 1.627119603181  | 1.444563800665  |
| H | -3.523289512425 | 2.273866557679  | 0.239462599811  |
| H | 0.706049371794  | -1.878863484128 | 0.893216180056  |
| H | -1.379487905104 | -2.524641723746 | 2.065622083080  |
| H | 0.317735263140  | 2.417713784426  | 1.286209888452  |
| H | 1.923744203797  | 4.254432779316  | 1.594889245280  |
| H | 2.204434407470  | 5.991596751988  | -0.166905170500 |
| H | 0.847517105878  | 5.881949314325  | -2.238623711184 |
| H | -0.868021901612 | 4.776274547660  | -3.610886710685 |
| H | -2.507318546136 | 2.947110459954  | -3.935957417584 |
| H | 1.011287135646  | 0.982162569651  | -1.056910710001 |
| H | -2.886339464056 | 0.290714320224  | -1.723982769103 |

## 20.xyz

34

-770.318641821

|   |                 |                 |                 |
|---|-----------------|-----------------|-----------------|
| C | 1.474057372343  | 2.258262945645  | 0.629321173766  |
| C | 2.412003063993  | 3.041128605101  | 1.354954038665  |
| C | 3.757753113383  | 2.977240749153  | 1.072158089778  |
| C | 4.223993002933  | 2.125785594107  | 0.042544547832  |
| C | 3.340378841968  | 1.351539088577  | -0.676963201262 |
| C | 1.945408280435  | 1.386128948251  | -0.405937614261 |
| C | 0.998360410960  | 0.597291638765  | -1.137259882701 |
| C | -0.347855738415 | 0.710610773395  | -0.841774529361 |
| C | -0.810099673175 | 1.574840077452  | 0.177876098748  |
| C | 0.082541419251  | 2.329622047540  | 0.902448657422  |
| C | 1.434367727744  | -0.321473569635 | -2.230112406749 |
| C | 2.055584008546  | -1.580155086990 | -1.940422890747 |
| C | 2.283969703067  | -2.032141227664 | -0.612233859357 |
| C | 2.881511841047  | -3.249264800690 | -0.368135119253 |
| C | 3.281846956953  | -4.079842182122 | -1.441604404138 |
| C | 3.067214258643  | -3.676450278436 | -2.740188911762 |
| C | 2.450313782554  | -2.428662325162 | -3.026079821966 |
| C | 2.209064022787  | -2.011542707506 | -4.361628727195 |
| C | 1.597020843149  | -0.806504095069 | -4.616265499344 |

|   |                 |                 |                 |
|---|-----------------|-----------------|-----------------|
| C | 1.210840309451  | 0.035278499003  | -3.547385965979 |
| H | 2.044910177224  | 3.698346095165  | 2.140824321524  |
| H | 4.464237595228  | 3.582594023085  | 1.634776812811  |
| H | 5.287063635875  | 2.084466467511  | -0.182126082048 |
| H | 3.708657067549  | 0.703666227219  | -1.467581859016 |
| H | -1.064772239693 | 0.113067814663  | -1.400237835673 |
| H | -1.875558463211 | 1.633816715478  | 0.386138471772  |
| H | -0.265535622842 | 2.993551541174  | 1.691083479282  |
| H | 1.976619941278  | -1.404054877344 | 0.219331226770  |
| H | 3.045679781784  | -3.576000967278 | 0.655877484351  |
| H | 3.754123551224  | -5.037627639010 | -1.237332390377 |
| H | 3.365946362917  | -4.312667230846 | -3.571074780507 |
| H | 2.512646404381  | -2.662263010248 | -5.179102359854 |
| H | 1.409957515057  | -0.490702153176 | -5.639661795325 |
| H | 0.736618999321  | 0.989679005167  | -3.764519297780 |

## 20-rc.xyz

34

-770.099520037

|   |                 |                 |                 |
|---|-----------------|-----------------|-----------------|
| C | 1.480612187654  | 2.199093921746  | 0.644542322712  |
| C | 2.411708209842  | 2.856022058533  | 1.485496612266  |
| C | 3.772436741222  | 2.681962509718  | 1.304735774380  |
| C | 4.237010506687  | 1.857826874802  | 0.266335344195  |
| C | 3.345468202972  | 1.189430576234  | -0.560574055240 |
| C | 1.951152070788  | 1.312318236253  | -0.376862340061 |
| C | 0.984586439127  | 0.667316217322  | -1.231571718955 |
| C | -0.372448635139 | 1.030507006402  | -1.119671095937 |
| C | -0.818271987249 | 1.885675573332  | -0.113843437034 |
| C | 0.093402362154  | 2.450742476903  | 0.770273934941  |
| C | 1.323166559178  | -0.351972782305 | -2.220845239804 |
| C | 2.113517493909  | -1.523208198125 | -1.930991536489 |
| C | 2.453373538025  | -1.916873786865 | -0.618586993008 |
| C | 3.184854262824  | -3.072762208187 | -0.385860591626 |
| C | 3.599398973424  | -3.886112181084 | -1.453583201841 |
| C | 3.248229984962  | -3.549340902391 | -2.748949123330 |
| C | 2.488034689467  | -2.383937958988 | -3.012629730713 |
| C | 2.050583299974  | -2.089834633177 | -4.326326657555 |
| C | 1.220288303931  | -1.003416753754 | -4.576349020185 |
| C | 0.837094136723  | -0.166061290876 | -3.530403354203 |
| H | 2.039960566405  | 3.516409226240  | 2.264723619665  |
| H | 4.479327042139  | 3.194486763379  | 1.950560756415  |
| H | 5.304894902340  | 1.743609981498  | 0.102918815683  |
| H | 3.732010960505  | 0.576301343734  | -1.368266414613 |
| H | -1.097664334754 | 0.568039863419  | -1.783033805554 |
| H | -1.878479188062 | 2.097418155974  | -0.015704076822 |
| H | -0.251625349052 | 3.119846601817  | 1.554462046839  |
| H | 2.127176427950  | -1.318547669816 | 0.226041410209  |
| H | 3.433667062823  | -3.350548304922 | 0.634486455342  |
| H | 4.177507322387  | -4.785064941346 | -1.260696022296 |
| H | 3.535098646380  | -4.188101877837 | -3.580314136684 |
| H | 2.349332584859  | -2.745097418012 | -5.140723708650 |
| H | 0.878831592425  | -0.796977611187 | -5.585976587472 |
| H | 0.214632676889  | 0.698415836841  | -3.743109076511 |



## 21.xyz

36

-6062.94502669

|    |                 |                 |                 |
|----|-----------------|-----------------|-----------------|
| C  | -1.419680289287 | 0.291278387757  | 3.092450301816  |
| C  | -2.133920722295 | 0.101023252023  | 4.301930573190  |
| C  | -1.560868171972 | 0.467791004722  | 5.495775296808  |
| C  | -0.270777125915 | 1.035605631819  | 5.548702246114  |
| C  | 0.434713071788  | 1.228042886391  | 4.381997245728  |
| C  | -0.110683817746 | 0.865394312744  | 3.122744292805  |
| C  | 0.610587198739  | 1.052433615155  | 1.900781772806  |
| C  | 0.018274669389  | 0.664957037376  | 0.704491482598  |
| C  | -1.281701787267 | 0.101817574557  | 0.672889455866  |
| C  | -1.979127298158 | -0.077994832917 | 1.839134230719  |
| C  | 1.982439860516  | 1.638069824477  | 1.886308832329  |
| C  | 3.144745837104  | 0.823605300973  | 2.071870292699  |
| C  | 2.143398815830  | 3.005793057961  | 1.697966944416  |
| C  | 3.429073348209  | 3.601535235746  | 1.674418995477  |
| C  | 4.546656489136  | 2.827096948048  | 1.847677147109  |
| C  | 4.441871788463  | 1.424833961739  | 2.054502684035  |
| C  | 5.593988990566  | 0.621110274723  | 2.242828783847  |
| C  | 5.455475970831  | -0.731255767456 | 2.442972681444  |
| C  | 4.185729818900  | -1.345284811922 | 2.464030619309  |
| C  | 3.057208378131  | -0.577661189122 | 2.281061846885  |
| O  | 0.641317296296  | 0.794493193321  | -0.494582651922 |
| O  | 1.092857608791  | 3.849206698154  | 1.530798058184  |
| Br | 6.992764550497  | -1.811574642223 | 2.702163640049  |
| Br | -2.506638049961 | 0.210077025413  | 7.119490641412  |
| H  | -3.128694649733 | -0.334459756498 | 4.270647445473  |
| H  | 0.160549696299  | 1.317509966586  | 6.504150945218  |
| H  | 1.428880257817  | 1.663952806953  | 4.425854615298  |
| H  | -1.702000899358 | -0.182830383309 | -0.287405506025 |
| H  | -2.975849762679 | -0.511926467380 | 1.813490036011  |
| H  | 3.502227400219  | 4.674355337596  | 1.521048343336  |
| H  | 5.532333658655  | 3.286063438489  | 1.831200640302  |
| H  | 6.575926590428  | 1.085519660817  | 2.228455305813  |
| H  | 4.101854837135  | -2.415828458014 | 2.623965781041  |
| H  | 2.080732204535  | -1.053606028934 | 2.298755123859  |
| H  | 1.531367627477  | 1.164774971466  | -0.353367985087 |
| H  | 0.263344004581  | 3.341713232621  | 1.589110009364  |

## 21-rc.xyz

36

-6062.72285997

|   |                 |                |                |
|---|-----------------|----------------|----------------|
| C | -1.516484649124 | 0.402136584442 | 3.085172859541 |
| C | -2.408362896511 | 0.468904428376 | 4.167922843010 |
| C | -1.995596078695 | 1.029253140091 | 5.369637568000 |
| C | -0.685423800957 | 1.504735393597 | 5.537108746048 |
| C | 0.204614456332  | 1.430288454161 | 4.483398648614 |
| C | -0.190889539543 | 0.916941334360 | 3.220979759496 |
| C | 0.716318466639  | 0.849094356393 | 2.116621724499 |
| C | 0.282676170835  | 0.214067699390 | 0.921748566528 |

|    |                 |                 |                 |
|----|-----------------|-----------------|-----------------|
| C  | -1.027280154901 | -0.305501349614 | 0.805382035416  |
| C  | -1.904151826652 | -0.201408943189 | 1.850919562987  |
| C  | 2.032480719529  | 1.494918201568  | 2.162751515182  |
| C  | 3.240148260457  | 0.740873826509  | 2.022050215631  |
| C  | 2.123242350189  | 2.909696695198  | 2.253273505290  |
| C  | 3.371801136397  | 3.567504845729  | 2.164230058311  |
| C  | 4.519806271840  | 2.843765607711  | 1.986683227840  |
| C  | 4.493360885739  | 1.418149039907  | 1.915867683272  |
| C  | 5.679223198810  | 0.679356874616  | 1.772419558134  |
| C  | 5.629216121868  | -0.708125993155 | 1.742686193288  |
| C  | 4.413131474046  | -1.394294236041 | 1.887349543867  |
| C  | 3.242418720750  | -0.677952809158 | 2.042867507862  |
| O  | 1.027760951906  | 0.134152826451  | -0.182983339057 |
| O  | 1.059848839068  | 3.711774064868  | 2.341983921273  |
| Br | 7.219225162065  | -1.688485953517 | 1.540033940036  |
| Br | -3.199330948936 | 1.121377071699  | 6.809384909747  |
| H  | -3.414049127896 | 0.074252005708  | 4.061048089565  |
| H  | -0.368033600070 | 1.908100144293  | 6.493061029553  |
| H  | 1.229284347552  | 1.756958453144  | 4.635910428308  |
| H  | -1.316753969138 | -0.760507482831 | -0.136367896580 |
| H  | -2.914174334028 | -0.589286381021 | 1.750541029709  |
| H  | 3.385408108115  | 4.651454461486  | 2.214823765922  |
| H  | 5.474627992744  | 3.356030829860  | 1.904655461289  |
| H  | 6.629417771726  | 1.198406561024  | 1.692412148219  |
| H  | 4.395425347213  | -2.478999927117 | 1.897246428882  |
| H  | 2.312521133949  | -1.216788480842 | 2.200245414460  |
| H  | 1.908593935035  | 0.529577318394  | -0.054528459157 |
| H  | 0.228356499610  | 3.205213637364  | 2.371771973343  |

## 22.xyz

34

-956.615330804

|   |                 |                 |                 |
|---|-----------------|-----------------|-----------------|
| C | -1.233013069657 | 2.109445124894  | 7.243513178665  |
| C | -1.361203974248 | 3.484847996764  | 7.575641801242  |
| C | -1.952150869168 | 4.371319480479  | 6.704157913812  |
| C | -2.447264796293 | 3.915853545610  | 5.459469897208  |
| C | -2.335636334494 | 2.589233836783  | 5.105734208848  |
| C | -1.720564232980 | 1.649957781774  | 5.977155338134  |
| C | -1.592592905459 | 0.260597107718  | 5.655552213539  |
| C | -1.029589465616 | -0.609935789091 | 6.569920060903  |
| C | -0.549168098374 | -0.149086182163 | 7.816924401859  |
| C | -0.644109851785 | 1.183247006393  | 8.144187829916  |
| C | -2.075313881846 | -0.277324520669 | 4.353553123607  |
| C | -1.359830669019 | -0.009777356711 | 3.125596375535  |
| C | -0.173891239937 | 0.744095454853  | 3.039059609557  |
| C | 0.461908012370  | 0.949499876863  | 1.827908134811  |
| C | -0.079942812125 | 0.394672262380  | 0.654070814993  |
| C | -1.246221048125 | -0.366427516059 | 0.702719516756  |
| C | -1.865684447511 | -0.560287600638 | 1.931522907993  |
| C | -3.694832290595 | -1.620942097101 | 3.079192378797  |
| C | -3.187971291200 | -1.063128268408 | 4.311890239104  |
| O | 0.496938115054  | 0.564192179432  | -0.560676097989 |
| O | -4.685289989923 | -2.321522037105 | 2.960559158972  |

|   |                 |                 |                 |
|---|-----------------|-----------------|-----------------|
| O | -2.995995606933 | -1.324082370550 | 1.926548203571  |
| H | -0.986461786916 | 3.825196568368  | 8.538716572133  |
| H | -2.045849653271 | 5.420893470187  | 6.971248212329  |
| H | -2.922633658819 | 4.618323135039  | 4.779437153562  |
| H | -2.728538492490 | 2.252991205295  | 4.150077757745  |
| H | -0.942936310154 | -1.664321158884 | 6.319221749984  |
| H | -0.103402000554 | -0.856350221721 | 8.511395132497  |
| H | -0.274709376134 | 1.544754896415  | 9.101461928526  |
| H | 0.248949954282  | 1.170652403443  | 3.943773543085  |
| H | 1.376366503144  | 1.535756173100  | 1.781354663207  |
| H | -1.662568050382 | -0.804021968159 | -0.198563585733 |
| H | -3.757235386288 | -1.290563645352 | 5.206568691057  |
| H | 1.298051479536  | 1.105113813678  | -0.479427622664 |

## 22-rc.xyz

34

-956.385897518

|   |                 |                 |                 |
|---|-----------------|-----------------|-----------------|
| C | -1.378979445091 | 2.140677839747  | 7.391977318421  |
| C | -1.888799677353 | 3.250873443875  | 8.102974449072  |
| C | -2.867695595339 | 4.069329990901  | 7.545081642430  |
| C | -3.345015829411 | 3.806943134461  | 6.257240332182  |
| C | -2.853143506435 | 2.724766440514  | 5.528242173717  |
| C | -1.891304960924 | 1.850125233154  | 6.087277351931  |
| C | -1.381084029058 | 0.714285439032  | 5.389696072768  |
| C | -0.354044885664 | -0.056543799902 | 5.961694177154  |
| C | 0.150126647270  | 0.245760839907  | 7.226565595870  |
| C | -0.360126440029 | 1.326153837474  | 7.939442282032  |
| C | -1.973021871832 | 0.257396957955  | 4.119341900858  |
| C | -1.182587262895 | 0.040047156972  | 2.944150567295  |
| C | 0.168640316224  | 0.437017495332  | 2.804225848217  |
| C | 0.872321803388  | 0.178956942878  | 1.649735458892  |
| C | 0.235261802200  | -0.488062686067 | 0.579220721442  |
| C | -1.108653962106 | -0.866844989512 | 0.668812300951  |
| C | -1.798578616106 | -0.593302137529 | 1.835150303465  |
| C | -3.920983945774 | -0.713955923378 | 2.944729338090  |
| C | -3.304418256619 | -0.087872218710 | 4.102730919194  |
| O | 0.867811360035  | -0.770905147888 | -0.568660978741 |
| O | -5.086434077648 | -1.042791626196 | 2.868617173544  |
| O | -3.108680712671 | -0.962697207200 | 1.864821729391  |
| H | -1.503788703984 | 3.462895648114  | 9.096861171803  |
| H | -3.248158978531 | 4.917206096799  | 8.106507474595  |
| H | -4.092735779584 | 4.455570805405  | 5.810843452099  |
| H | -3.195856804836 | 2.574129240546  | 4.509332048829  |
| H | 0.012865239624  | -0.929808508068 | 5.430027687890  |
| H | 0.925197721161  | -0.377086244457 | 7.661936368446  |
| H | 0.025459730975  | 1.554830353591  | 8.929488301217  |
| H | 0.654337338244  | 0.968849709729  | 3.616667795522  |
| H | 1.906395222257  | 0.498017584755  | 1.552344652933  |
| H | -1.601657071932 | -1.357024873845 | -0.163677693790 |
| H | -3.938445601867 | 0.023532445101  | 4.975007432953  |
| H | 1.793391308400  | -0.477598686633 | -0.538939965111 |

## 23.xyz

32

-5836.34887967

|    |                 |                 |                 |
|----|-----------------|-----------------|-----------------|
| C  | 3.197954063927  | 0.062218736025  | 2.547953900217  |
| C  | 4.063209155840  | 0.476226456754  | 1.536668659887  |
| C  | 3.580009512512  | 0.643557798570  | 0.238736099227  |
| C  | 2.237418641118  | 0.389800108835  | -0.037249343214 |
| C  | 1.358490186682  | -0.020281699606 | 0.972781305679  |
| C  | 1.848860274176  | -0.200739163196 | 2.280217686822  |
| C  | 0.955017511085  | -0.638944427782 | 3.390832722205  |
| C  | -0.071118369596 | -0.284458135933 | 0.639337571900  |
| C  | -0.037816255678 | -2.393963423418 | 4.771030602556  |
| C  | 0.772462516214  | -1.989475831793 | 3.712044653701  |
| C  | 0.268720563101  | 0.305422587746  | 4.167947702077  |
| C  | -0.555434890597 | -0.080569874152 | 5.223134948681  |
| C  | -0.711444755326 | -1.433697292006 | 5.523667529068  |
| C  | -0.483035972251 | -1.561375360028 | 0.231275659129  |
| C  | -1.049996794278 | 0.714281816556  | 0.708679511468  |
| C  | -2.379273131120 | 0.470871824597  | 0.368825392579  |
| C  | -2.761263470211 | -0.809203167961 | -0.028571054895 |
| C  | -1.810183960600 | -1.827017977709 | -0.100074442448 |
| Br | 1.723659407065  | -3.326326484483 | 2.751053677936  |
| Br | -0.555842727308 | 2.488461790617  | 1.181576021057  |
| H  | 3.571284511696  | -0.070227634865 | 3.560859080904  |
| H  | 5.108080365937  | 0.672196536156  | 1.764037753861  |
| H  | 4.245268332366  | 0.965292541549  | -0.558628181408 |
| H  | 1.857021403949  | 0.521065332084  | -1.047707178829 |
| H  | -0.145103649442 | -3.449632453118 | 5.000954591675  |
| H  | 0.395350566277  | 1.358958443150  | 3.934307194939  |
| H  | -1.071896537731 | 0.675326120630  | 5.808759262715  |
| H  | -1.348260184727 | -1.748038551574 | 6.346420378509  |
| H  | 0.260452884036  | -2.351512005244 | 0.172020293217  |
| H  | -3.109089702221 | 1.273128321600  | 0.420008706637  |
| H  | -3.798970602001 | -1.002145189988 | -0.287827737993 |
| H  | -2.097873155551 | -2.826638661204 | -0.414841298842 |

## 23-rc.xyz

32

-5836.10806851

|   |                 |                 |                 |
|---|-----------------|-----------------|-----------------|
| C | 3.122529682334  | 0.379928449658  | 2.590147004316  |
| C | 4.013024343885  | 0.641050658621  | 1.559148945145  |
| C | 3.614647797144  | 0.476231144903  | 0.218984664134  |
| C | 2.321080483188  | 0.075393555226  | -0.081468935583 |
| C | 1.390381559296  | -0.145983896197 | 0.944618182738  |
| C | 1.824537782242  | -0.072158351586 | 2.309383440410  |
| C | 0.949992852044  | -0.482280098000 | 3.414832202508  |
| C | -0.009493700039 | -0.424119556718 | 0.600072679894  |
| C | -0.560398072189 | -2.087348651088 | 4.510731418613  |
| C | 0.332161449216  | -1.760177602592 | 3.483823437941  |
| C | 0.703432339442  | 0.412975993285  | 4.470494609485  |
| C | -0.182154450074 | 0.094677821715  | 5.487826363873  |
| C | -0.830959413594 | -1.155160749858 | 5.499336601706  |
| C | -0.309240247938 | -1.487650409197 | -0.269217169498 |
| C | -1.099128368682 | 0.339375081755  | 1.098886162899  |
| C | -2.425123662291 | -0.004748307122 | 0.813533674015  |

|    |                 |                 |                 |
|----|-----------------|-----------------|-----------------|
| C  | -2.685115763219 | -1.101159781443 | 0.007397489385  |
| C  | -1.620904431527 | -1.835115985522 | -0.550954958894 |
| Br | 0.937578508980  | -3.158394863016 | 2.385759824519  |
| Br | -0.791431090283 | 2.015293440167  | 1.889671020980  |
| H  | 3.449578621793  | 0.449551643423  | 3.623560282688  |
| H  | 5.029442557835  | 0.948110526733  | 1.787728073262  |
| H  | 4.314566720703  | 0.688795246875  | -0.583809474265 |
| H  | 1.999011199375  | 0.004908958453  | -1.116423525964 |
| H  | -1.012582650108 | -3.073243256213 | 4.538370357082  |
| H  | 1.168356343077  | 1.393707269495  | 4.440854019807  |
| H  | -0.396754760373 | 0.823741467051  | 6.263501422580  |
| H  | -1.523009396289 | -1.402719051604 | 6.298776289081  |
| H  | 0.508361728142  | -2.082478439072 | -0.664853036921 |
| H  | -3.236030025013 | 0.600628537760  | 1.204829516926  |
| H  | -3.712293530029 | -1.374645754069 | -0.215242025162 |
| H  | -1.827408669708 | -2.694423961011 | -1.182066888684 |

## 24.xyz

36

-1102.9885791

|   |                 |                 |                 |
|---|-----------------|-----------------|-----------------|
| C | 0.366194253336  | 6.470283561787  | 1.313757192031  |
| C | 0.173471529150  | 7.256133214230  | 0.179982102287  |
| C | -0.013589256183 | 6.643910640298  | -1.058594334161 |
| C | -0.021768001132 | 5.253724293212  | -1.144711888356 |
| C | 0.158794507017  | 4.448110489721  | -0.010269805844 |
| C | 0.372441678525  | 5.069176293302  | 1.241714531054  |
| C | 0.651921445001  | 4.304409101432  | 2.487493138447  |
| C | 0.066962046573  | 2.971899486236  | -0.175788831119 |
| C | 0.221299829878  | 3.875081483400  | 4.819591225626  |
| C | -0.081873132499 | 4.566484576174  | 3.648748386672  |
| C | 1.683238266813  | 3.352109988470  | 2.546863464706  |
| C | 1.972631433244  | 2.673725906594  | 3.730359745740  |
| C | 1.239241416980  | 2.926525131957  | 4.886322638532  |
| C | -0.818871006745 | 2.202823955613  | 0.597514420160  |
| C | 0.829288069293  | 2.327284888017  | -1.155010886392 |
| C | 0.698245372600  | 0.951014867106  | -1.327542574311 |
| C | -0.173995498595 | 0.180387709321  | -0.562044138997 |
| C | -0.937410029735 | 0.826711256237  | 0.406014519201  |
| N | -0.563384540051 | 4.155585110883  | 6.022229647591  |
| N | 1.510780046871  | 0.292988666052  | -2.350950980504 |
| O | 1.397113011079  | -0.922917154788 | -2.485977116561 |
| O | -1.455651925594 | 4.997236050378  | 5.949721692766  |
| O | -0.291792397593 | 3.535354613850  | 7.047439575595  |
| O | 2.267307634992  | 0.986975270525  | -3.026114120452 |
| H | 0.546016094089  | 6.948173265534  | 2.273944279174  |
| H | 0.180085898168  | 8.339682094343  | 0.264494447331  |
| H | -0.163183019415 | 7.242808624811  | -1.953136834382 |
| H | -0.202319761835 | 4.776682238008  | -2.105100552690 |
| H | -0.891211081394 | 5.288292143987  | 3.644739251807  |
| H | 2.276060289003  | 3.151811180038  | 1.658748560831  |
| H | 2.779791319072  | 1.947363756948  | 3.754187572896  |
| H | 1.447638866612  | 2.410004816149  | 5.816072773837  |
| H | -1.433928288826 | 2.691130020952  | 1.348141685494  |

|   |                 |                 |                 |
|---|-----------------|-----------------|-----------------|
| H | 1.529784995102  | 2.881412677195  | -1.770109258047 |
| H | -0.250641451564 | -0.888101291761 | -0.726601956453 |
| H | -1.634235952780 | 0.254367625781  | 1.011372426353  |

## 24-rc.xyz

36

-1102.74093340

|   |                 |                 |                 |
|---|-----------------|-----------------|-----------------|
| C | 0.097427196762  | 6.442052700360  | 1.364377945462  |
| C | 0.036657187845  | 7.211410479763  | 0.218477342945  |
| C | 0.120625572179  | 6.603689631450  | -1.057600558236 |
| C | 0.239408366071  | 5.231652359011  | -1.172355789607 |
| C | 0.254443806262  | 4.415345062698  | -0.025749114049 |
| C | 0.267915487211  | 5.046541605698  | 1.283196166111  |
| C | 0.560648458532  | 4.297799118260  | 2.499866719438  |
| C | 0.148319138749  | 2.969412217034  | -0.185755881885 |
| C | 0.232613422067  | 3.943056728797  | 4.858528919655  |
| C | -0.077994504697 | 4.646881615216  | 3.711312140054  |
| C | 1.531615331117  | 3.263245001612  | 2.516434515853  |
| C | 1.842027336279  | 2.595450289360  | 3.694036585826  |
| C | 1.186167140980  | 2.919956359524  | 4.880176333890  |
| C | -0.683545725301 | 2.190973889432  | 0.659390223250  |
| C | 0.829113805474  | 2.328672746084  | -1.244654621197 |
| C | 0.695470423803  | 0.961999446713  | -1.396252552679 |
| C | -0.121192891136 | 0.188398038785  | -0.565251495739 |
| C | -0.819668437434 | 0.823019168806  | 0.460416948249  |
| N | -0.467809366207 | 4.286404110007  | 6.105655486076  |
| N | 1.440515689452  | 0.298683143737  | -2.477134967134 |
| O | 1.294865429845  | -0.910603040977 | -2.604991710498 |
| O | -1.307455599014 | 5.177315473977  | 6.061518159929  |
| O | -0.167212532317 | 3.659354627487  | 7.113794994582  |
| O | 2.159651882188  | 0.994057285550  | -3.184259649781 |
| H | 0.109491714605  | 6.928603935813  | 2.334359519381  |
| H | -0.042375529677 | 8.291495495533  | 0.295452293737  |
| H | 0.057464107890  | 7.217887491544  | -1.950657720666 |
| H | 0.225691418897  | 4.774540624205  | -2.156586125854 |
| H | -0.838966466345 | 5.417832015582  | 3.746250568046  |
| H | 2.080304868803  | 3.026281622559  | 1.611312509743  |
| H | 2.603513533240  | 1.822348836108  | 3.693931661826  |
| H | 1.406462742300  | 2.403427562341  | 5.807520232152  |
| H | -1.264917574762 | 2.676104793674  | 1.436330585257  |
| H | 1.488863445668  | 2.879904852707  | -1.904662536757 |
| H | -0.205994619923 | -0.879732926102 | -0.730031917945 |
| H | -1.477691599947 | 0.245184189643  | 1.101104790430  |

## 25.xyz

50

SCF = -1154.87796159

|   |                |                |                 |
|---|----------------|----------------|-----------------|
| C | 2.564858655928 | 1.754381628561 | -0.469488469467 |
| C | 2.615333008772 | 2.557992311394 | -1.640932908284 |
| C | 1.754153076080 | 2.341634457834 | -2.693348304482 |
| C | 0.793711655648 | 1.306943915687 | -2.622778480719 |
| C | 0.722326763727 | 0.504611770828 | -1.506034476657 |

|   |                 |                 |                 |
|---|-----------------|-----------------|-----------------|
| C | 1.602180862296  | 0.692258447896  | -0.405357411906 |
| C | 1.543406670798  | -0.140481124321 | 0.758108095001  |
| C | 2.415198972646  | 0.104461134139  | 1.800436036504  |
| C | 3.360813679235  | 1.151142762995  | 1.738279436188  |
| C | 3.448567007245  | 1.976450297446  | 0.635067135626  |
| C | 4.470244923984  | 3.065057693556  | 0.609755496838  |
| C | 0.541099152643  | -1.240336077827 | 0.879912963598  |
| C | 0.726400813025  | -2.495342629131 | 0.214144008528  |
| C | 1.863827518505  | -2.771959443000 | -0.591939523160 |
| C | 2.013587632655  | -3.991472160142 | -1.215261081690 |
| C | 1.031978330895  | -4.999544050755 | -1.063897240120 |
| C | -0.078886670017 | -4.766586977972 | -0.284930894060 |
| C | -0.262204395288 | -3.520913658055 | 0.373677307953  |
| C | -1.397784231603 | -3.275445215778 | 1.189771318215  |
| C | -1.548806535488 | -2.067430955435 | 1.829728243691  |
| C | -0.576126744572 | -1.052791065508 | 1.672869209915  |
| C | 5.131131011987  | 5.431305290715  | 0.869125940808  |
| C | 4.776919533889  | 6.779026116279  | 1.147141303850  |
| C | 3.475597991590  | 7.125012005919  | 1.433635610845  |
| C | 2.468271177343  | 6.131394273311  | 1.456514332401  |
| C | 2.778939633394  | 4.816100499173  | 1.189069439397  |
| C | 4.111096843192  | 4.424552540258  | 0.885031562168  |
| C | 5.791382073157  | 2.752982480924  | 0.347474119256  |
| C | 6.795605341893  | 3.748865274656  | 0.332377996446  |
| C | 6.472259477338  | 5.061644294277  | 0.584805466214  |
| H | 3.350874650800  | 3.355728447523  | -1.697274839383 |
| H | 1.810866431201  | 2.968792929149  | -3.579725116671 |
| H | 0.110848313541  | 1.144281718370  | -3.453095097512 |
| H | -0.017970609845 | -0.289126451531 | -1.456803504971 |
| H | 2.376711448790  | -0.523611481319 | 2.687482784563  |
| H | 4.027975400226  | 1.313724623634  | 2.581624401235  |
| H | 2.624365396636  | -2.005109656131 | -0.711406288907 |
| H | 2.892052449201  | -4.182626479894 | -1.826870027403 |
| H | 1.160132909282  | -5.957931337154 | -1.561074451066 |
| H | -0.835306088547 | -5.538864232989 | -0.159531820883 |
| H | -2.143460307083 | -4.059638177503 | 1.303292926720  |
| H | -2.417252716398 | -1.882946233958 | 2.457280516426  |
| H | -0.712759356222 | -0.100084712622 | 2.179431645997  |
| H | 5.557692069136  | 7.536939854253  | 1.132287375370  |
| H | 3.218965137182  | 8.160037078087  | 1.645768723665  |
| H | 1.442814529826  | 6.409258314938  | 1.687952360463  |
| H | 1.999062373587  | 4.059829796163  | 1.212260460166  |
| H | 6.061225406155  | 1.719670465776  | 0.141602427077  |
| H | 7.823844585596  | 3.467821825784  | 0.118355765279  |
| H | 7.239587656325  | 5.833027585599  | 0.573527347877  |

## 25-rc.xyz

50

SCF= -1154.6520724

|   |                |                |                 |
|---|----------------|----------------|-----------------|
| C | 2.629946542116 | 1.711234040742 | -0.300011032943 |
| C | 2.709148679839 | 2.484125720419 | -1.482397511956 |
| C | 1.834329693177 | 2.277294023125 | -2.534089468654 |
| C | 0.837173096996 | 1.293378918559 | -2.435553600839 |

|   |                 |                 |                 |
|---|-----------------|-----------------|-----------------|
| C | 0.766244144949  | 0.488118902365  | -1.312723112193 |
| C | 1.680313839261  | 0.637994533109  | -0.243431232937 |
| C | 1.648524595401  | -0.223391724322 | 0.907494439925  |
| C | 2.514799191633  | 0.048814882161  | 1.978470020971  |
| C | 3.448908944748  | 1.073723185059  | 1.913988662686  |
| C | 3.499965365768  | 1.950558802753  | 0.818938626664  |
| C | 4.446760551002  | 3.072348240947  | 0.892901406323  |
| C | 0.749772780858  | -1.378553260013 | 1.039903970959  |
| C | 0.692638178394  | -2.460347594632 | 0.091514136507  |
| C | 1.616234779268  | -2.607128083114 | -0.971880105068 |
| C | 1.538905935617  | -3.680228488938 | -1.839499248970 |
| C | 0.538592782504  | -4.661217959693 | -1.682136789210 |
| C | -0.355757465431 | -4.566196871010 | -0.636380292246 |
| C | -0.291519374321 | -3.484107099352 | 0.278623196626  |
| C | -1.161768092418 | -3.425873506391 | 1.395814784474  |
| C | -1.045738579351 | -2.415712099979 | 2.332644375835  |
| C | -0.078201970133 | -1.414965620179 | 2.166462798891  |
| C | 5.074508488864  | 5.457500557654  | 0.773871216559  |
| C | 4.708811939903  | 6.823864620148  | 0.664433810191  |
| C | 3.383572197544  | 7.195609593377  | 0.576964794686  |
| C | 2.376001370119  | 6.209747546516  | 0.609046722824  |
| C | 2.703183651219  | 4.870201690540  | 0.701388177687  |
| C | 4.054788708465  | 4.451472209321  | 0.759601872323  |
| C | 5.789057817212  | 2.764049463523  | 1.132908223354  |
| C | 6.780001309682  | 3.755930303361  | 1.129549743797  |
| C | 6.430740996798  | 5.079844336780  | 0.938354277761  |
| H | 3.469288593132  | 3.254031449557  | -1.563709286243 |
| H | 1.913077293497  | 2.886302576140  | -3.430121333478 |
| H | 0.126744539353  | 1.154062023707  | -3.245391426841 |
| H | -0.003750329542 | -0.273611736377 | -1.251753718783 |
| H | 2.486293546733  | -0.589077131581 | 2.857282865011  |
| H | 4.117931189053  | 1.235910024345  | 2.754386082509  |
| H | 2.406492503985  | -1.874266843951 | -1.103127022454 |
| H | 2.260385513511  | -3.769984291609 | -2.647174472013 |
| H | 0.485151935959  | -5.497269434136 | -2.373922796378 |
| H | -1.113581849947 | -5.331741749874 | -0.488019302735 |
| H | -1.910398342147 | -4.204640885038 | 1.519735456498  |
| H | -1.707407771353 | -2.385545791663 | 3.193329839794  |
| H | -0.015851201027 | -0.611948518020 | 2.896199449342  |
| H | 5.493392978059  | 7.576721967394  | 0.669665719777  |
| H | 3.113551003345  | 8.245142597694  | 0.499964611154  |
| H | 1.330996926505  | 6.504881371842  | 0.566676514367  |
| H | 1.908828386249  | 4.131357026346  | 0.743625932096  |
| H | 6.078723314242  | 1.724446529920  | 1.261203285009  |
| H | 7.820296847014  | 3.476734785654  | 1.268476854250  |
| H | 7.195247733982  | 5.853094480917  | 0.935941706031  |

### 1.xyz

37

SCF = -826.0871786

|   |                 |                |                |
|---|-----------------|----------------|----------------|
| C | -0.017158398199 | 0.127949119517 | 0.009009120842 |
| C | -0.032806592427 | 0.064791421192 | 1.426772110268 |
| C | 1.210031121776  | 0.050756353321 | 2.137970824864 |



|   |                 |                 |                 |
|---|-----------------|-----------------|-----------------|
| C | 2.420707917282  | 0.097907710307  | 1.398871733725  |
| C | 2.401358305698  | 0.159084911825  | 0.022919703132  |
| C | 1.173999812903  | 0.174861077553  | -0.679317927776 |
| C | -1.253420210907 | 0.011190346086  | 2.149418194883  |
| C | -1.257753498056 | -0.054602063723 | 3.520765260021  |
| C | -0.022623525833 | -0.065332341859 | 4.198496135432  |
| C | 1.202678737464  | -0.013288197031 | 3.568686922664  |
| C | 2.475158273339  | -0.040501853772 | 4.351374087266  |
| C | 3.013684300045  | -1.257692924067 | 4.733617130033  |
| C | 4.219952856382  | -1.324326105405 | 5.468072907947  |
| C | 4.881048360623  | -0.168853747606 | 5.813546108771  |
| C | 4.366323558603  | 1.101697289027  | 5.444415947373  |
| C | 3.143404911171  | 1.178152381526  | 4.701535575205  |
| C | 5.037481671525  | 2.303110224494  | 5.795827276368  |
| C | 4.527263704600  | 3.529106500452  | 5.433565355075  |
| C | 3.319077684566  | 3.605397213289  | 4.701442153624  |
| C | 2.643220095906  | 2.459243570156  | 4.344549700452  |
| N | -0.053276302670 | -0.125274078769 | 5.672521688781  |
| H | -0.964229467431 | 0.137793573054  | -0.525174085181 |
| H | 1.174848865811  | 0.222784478575  | -1.764954634348 |
| H | 3.336976546264  | 0.194960801033  | -0.528768125459 |
| H | 3.368044143615  | 0.083321577537  | 1.929581966216  |
| H | -2.192094959172 | -0.096199742179 | 4.074684079042  |
| H | -2.193645229565 | 0.021187406879  | 1.604582080620  |
| H | 1.718751825364  | 2.531639307124  | 3.777546154410  |
| H | 2.923082095428  | 4.576846221233  | 4.416669764035  |
| H | 5.050626833238  | 4.441430042290  | 5.707381955807  |
| H | 5.966094338968  | 2.236468405182  | 6.358447299556  |
| H | 5.810408771033  | -0.214259398816 | 6.376803709806  |
| H | 4.620060440145  | -2.293972879003 | 5.751255127081  |
| H | 2.506963832689  | -2.178356490600 | 4.452490844805  |
| H | -0.544673254061 | -0.956991442821 | 6.019030640426  |
| H | 0.906393021994  | -0.162895797372 | 6.043666250000  |
| H | -0.512722360115 | 0.693944632318  | 6.086397852265  |

## 2.xyz

43

SCF = -904.66849836

|   |                 |                 |                 |
|---|-----------------|-----------------|-----------------|
| C | -0.111057833999 | 0.076281835774  | -0.055537085598 |
| C | -0.088246320027 | -0.031302909866 | 1.323037290218  |
| C | 1.169435698108  | -0.088409567098 | 2.008506109425  |
| C | 2.376542482809  | -0.076797297917 | 1.236806735620  |
| C | 2.301216201528  | 0.009439488336  | -0.178263045019 |
| C | 1.083537491135  | 0.091055194057  | -0.811552473559 |
| C | 3.626919233567  | -0.143764059115 | 1.907707849699  |
| C | 3.689868455803  | -0.212261615856 | 3.280885984970  |
| C | 2.498861182751  | -0.215191635781 | 4.044501792142  |
| C | 1.270342981597  | -0.155972719221 | 3.424102981492  |
| C | -1.370770617659 | 0.013592555846  | 2.093407400460  |
| C | -1.816318866591 | 1.288509373388  | 2.589849157512  |
| C | -3.038735376723 | 1.390641431404  | 3.327794806158  |
| C | -3.803022563943 | 0.222683368823  | 3.562344933246  |
| C | -3.379399346394 | -0.989962867095 | 3.083653040356  |

|   |                 |                 |                 |
|---|-----------------|-----------------|-----------------|
| C | -2.171790002325 | -1.085406929554 | 2.354985068330  |
| C | -1.070138146558 | 2.476728185610  | 2.361357826606  |
| C | -1.509276025832 | 3.691134424962  | 2.839921662962  |
| C | -2.716194636071 | 3.785826767750  | 3.570795589368  |
| C | -3.464636365861 | 2.656641174773  | 3.808542836879  |
| N | -1.864709836419 | -2.467101438934 | 1.885672750451  |
| C | -2.106828908165 | -2.673708937218 | 0.415747710649  |
| C | -0.542397870855 | -3.031040758137 | 2.319648579766  |
| H | -4.395494699059 | 2.716616674277  | 4.367526019927  |
| H | -3.049543462846 | 4.751430789399  | 3.941534604016  |
| H | -0.922551967263 | 4.586574320233  | 2.652600896681  |
| H | -0.143957068957 | 2.425275531671  | 1.798311975780  |
| H | -3.977383266621 | -1.880281993379 | 3.267003650567  |
| H | -4.730080537607 | 0.291993599315  | 4.124842367226  |
| H | 0.363365210831  | -0.154174224855 | 4.023078210209  |
| H | 2.554903855907  | -0.262098765425 | 5.129090458944  |
| H | 4.652840200951  | -0.260888230395 | 3.782470949820  |
| H | 4.538253164937  | -0.136803830702 | 1.313704322591  |
| H | 3.224182930247  | 0.020384583851  | -0.753600123720 |
| H | 1.029235176052  | 0.172678134253  | -1.893747388271 |
| H | -1.064818188076 | 0.171276049624  | -0.569467190736 |
| H | 0.256145811298  | -2.540519280053 | 1.769459546101  |
| H | -0.431576324265 | -2.865476384032 | 3.391039879837  |
| H | -0.552139785725 | -4.099551990133 | 2.099384290301  |
| H | -2.086825361366 | -3.746545930027 | 0.219353004839  |
| H | -1.320589609889 | -2.170079495633 | -0.141600347439 |
| H | -3.083580471563 | -2.257997220017 | 0.167944279241  |
| H | -2.562800273800 | -3.051000514762 | 2.354962585488  |

## 2-rc.xyz

43

SCF= -904.422421327

|   |                 |                 |                 |
|---|-----------------|-----------------|-----------------|
| C | -0.125657133193 | 0.276256610930  | -0.012853798796 |
| C | -0.078765295724 | 0.027479544433  | 1.371998046984  |
| C | 1.183904512666  | -0.129202113481 | 2.011570302106  |
| C | 2.372327757886  | -0.119841181071 | 1.215707297900  |
| C | 2.276949850843  | 0.066671898134  | -0.180089861529 |
| C | 1.034058500323  | 0.272338701384  | -0.784498740375 |
| C | 3.627841156371  | -0.262741142251 | 1.849677351409  |
| C | 3.721091236743  | -0.397746477962 | 3.240210531747  |
| C | 2.566208854398  | -0.381803777083 | 4.018921391416  |
| C | 1.309777445639  | -0.242594658513 | 3.416558663588  |
| C | -1.350877248215 | 0.028491025538  | 2.150484039089  |
| C | -1.835808381060 | 1.307610833946  | 2.584330487179  |
| C | -3.087094743897 | 1.404685136743  | 3.270642696491  |
| C | -3.823325860894 | 0.227329855227  | 3.530722551216  |
| C | -3.350568051317 | -0.995261558724 | 3.118516642005  |
| C | -2.124016455865 | -1.093211747197 | 2.431446618246  |
| C | -1.094031823278 | 2.500551918507  | 2.364789067917  |
| C | -1.586948646478 | 3.725226012178  | 2.772857317791  |
| C | -2.825480281841 | 3.816674982584  | 3.438773087148  |
| C | -3.558162035099 | 2.674650272888  | 3.689741036908  |
| N | -1.812216466798 | -2.470900568938 | 1.958777107276  |

|   |                 |                 |                 |
|---|-----------------|-----------------|-----------------|
| C | -2.051128396931 | -2.661306677184 | 0.482837846599  |
| C | -0.497137731582 | -3.055174271259 | 2.390692486040  |
| H | -4.505681364826 | 2.732130563809  | 4.219043058218  |
| H | -3.196766192324 | 4.784907031189  | 3.761533846006  |
| H | -1.007489880544 | 4.624624797382  | 2.585458005246  |
| H | -0.124288485531 | 2.458794749246  | 1.879609096142  |
| H | -3.938028125696 | -1.889501283425 | 3.312340005222  |
| H | -4.771733666682 | 0.291503091797  | 4.056157014056  |
| H | 0.421444631863  | -0.206435614150 | 4.040739410365  |
| H | 2.633352398295  | -0.470730065886 | 5.098696955896  |
| H | 4.695232527780  | -0.503885461182 | 3.706888542120  |
| H | 4.530151453978  | -0.254642078199 | 1.244446144962  |
| H | 3.181673217617  | 0.068309232373  | -0.781831128072 |
| H | 0.971459476268  | 0.432847604421  | -1.856054301716 |
| H | -1.087342584649 | 0.453133478947  | -0.485965492602 |
| H | 0.309290243110  | -2.592647920672 | 1.828478889946  |
| H | -0.377661697530 | -2.892225751044 | 3.461475273378  |
| H | -0.528365912341 | -4.123685122662 | 2.174104227917  |
| H | -2.038148614079 | -3.732230256980 | 0.278370877180  |
| H | -1.257781966915 | -2.163364212111 | -0.070940847959 |
| H | -3.023471909044 | -2.236499844584 | 0.233971958821  |
| H | -2.515997968387 | -3.056160668957 | 2.419475790053  |

### 3.xyz

38

SCF = -884.537496

|   |                 |                 |                 |
|---|-----------------|-----------------|-----------------|
| C | 3.039341821666  | -0.920477478227 | -3.364400590990 |
| C | 3.326226024123  | -0.317247960813 | -4.618103102379 |
| C | 3.023028192326  | 1.004329217179  | -4.853670711488 |
| C | 2.415198327308  | 1.777397973317  | -3.834594083229 |
| C | 2.126323748317  | 1.222507511357  | -2.607675287060 |
| C | 2.429385649699  | -0.140586334629 | -2.327867217681 |
| C | 2.141969428478  | -0.739514193155 | -1.065503324398 |
| C | 2.452735679242  | -2.081345878601 | -0.861458092454 |
| C | 3.054989748982  | -2.852576936484 | -1.887444357892 |
| C | 3.339131815034  | -2.279256303308 | -3.105162822311 |
| C | 1.533081952944  | 0.057469284409  | 0.040479569113  |
| C | 0.113512025305  | 0.105938933784  | 0.218392662808  |
| C | -0.785224949417 | -0.583129944780 | -0.640038802699 |
| C | -2.147201575057 | -0.517208476394 | -0.444054346235 |
| C | -2.681707700288 | 0.243976832563  | 0.622871276361  |
| C | -1.838932445564 | 0.925820243648  | 1.471459363294  |
| C | -0.429556542146 | 0.879244378785  | 1.295792303731  |
| C | 0.449472171483  | 1.581749681935  | 2.161325098989  |
| C | 1.810464174269  | 1.524787394684  | 1.968803776726  |
| C | 2.348114166251  | 0.761537909076  | 0.906597404317  |
| O | 2.149507040370  | -2.594814646260 | 0.361432061094  |
| C | 2.438539855902  | -3.959976131936 | 0.628492095827  |
| H | 3.791865099949  | -0.923506913701 | -5.392901329358 |
| H | 3.246518998215  | 1.456045028142  | -5.816923047286 |
| H | 2.173298218554  | 2.820661659195  | -4.024029494905 |
| H | 1.661120306868  | 1.828118955318  | -1.834928661259 |
| H | 3.296908551996  | -3.896367754068 | -1.719154931395 |
| H | 3.802828407244  | -2.877654935201 | -3.886607542791 |

|   |                 |                 |                 |
|---|-----------------|-----------------|-----------------|
| H | -0.381168446635 | -1.168905053773 | -1.461677424334 |
| H | -2.817672349918 | -1.052247293468 | -1.112402142325 |
| H | -3.758264543404 | 0.288743695558  | 0.768730940080  |
| H | -2.242607145955 | 1.514429023542  | 2.293031101945  |
| H | 0.029287780504  | 2.166776505404  | 2.977039444519  |
| H | 2.481623093357  | 2.065334577087  | 2.631888583835  |
| H | 3.426395465305  | 0.724948317381  | 0.768187405921  |
| H | 2.109280879273  | -4.133692732845 | 1.654045054566  |
| H | 1.886888794114  | -4.625468640908 | -0.046394271395 |
| H | 3.513609729938  | -4.163526849268 | 0.554163063654  |

### 3-rc.xyz

38

SCF = -884.319168

|   |                 |                 |                 |
|---|-----------------|-----------------|-----------------|
| C | 3.039341821666  | -0.920477478227 | -3.364400590990 |
| C | 3.326226024123  | -0.317247960813 | -4.618103102379 |
| C | 3.023028192326  | 1.004329217179  | -4.853670711488 |
| C | 2.415198327308  | 1.777397973317  | -3.834594083229 |
| C | 2.126323748317  | 1.222507511357  | -2.607675287060 |
| C | 2.429385649699  | -0.140586334629 | -2.327867217681 |
| C | 2.141969428478  | -0.739514193155 | -1.065503324398 |
| C | 2.452735679242  | -2.081345878601 | -0.861458092454 |
| C | 3.054989748982  | -2.852576936484 | -1.887444357892 |
| C | 3.339131815034  | -2.279256303308 | -3.105162822311 |
| C | 1.533081952944  | 0.057469284409  | 0.040479569113  |
| C | 0.113512025305  | 0.105938933784  | 0.218392662808  |
| C | -0.785224949417 | -0.583129944780 | -0.640038802699 |
| C | -2.147201575057 | -0.517208476394 | -0.444054346235 |
| C | -2.681707700288 | 0.243976832563  | 0.622871276361  |
| C | -1.838932445564 | 0.925820243648  | 1.471459363294  |
| C | -0.429556542146 | 0.879244378785  | 1.295792303731  |
| C | 0.449472171483  | 1.581749681935  | 2.161325098989  |
| C | 1.810464174269  | 1.524787394684  | 1.968803776726  |
| C | 2.348114166251  | 0.761537909076  | 0.906597404317  |
| O | 2.149507040370  | -2.594814646260 | 0.361432061094  |
| C | 2.438539855902  | -3.959976131936 | 0.628492095827  |
| H | 3.791865099949  | -0.923506913701 | -5.392901329358 |
| H | 3.246518998215  | 1.456045028142  | -5.816923047286 |
| H | 2.173298218554  | 2.820661659195  | -4.024029494905 |
| H | 1.661120306868  | 1.828118955318  | -1.834928661259 |
| H | 3.296908551996  | -3.896367754068 | -1.719154931395 |
| H | 3.802828407244  | -2.877654935201 | -3.886607542791 |
| H | -0.381168446635 | -1.168905053773 | -1.461677424334 |
| H | -2.817672349918 | -1.052247293468 | -1.112402142325 |
| H | -3.758264543404 | 0.288743695558  | 0.768730940080  |
| H | -2.242607145955 | 1.514429023542  | 2.293031101945  |
| H | 0.029287780504  | 2.166776505404  | 2.977039444519  |
| H | 2.481623093357  | 2.065334577087  | 2.631888583835  |
| H | 3.426395465305  | 0.724948317381  | 0.768187405921  |
| H | 2.109280879273  | -4.133692732845 | 1.654045054566  |
| H | 1.886888794114  | -4.625468640908 | -0.046394271395 |
| H | 3.513609729938  | -4.163526849268 | 0.554163063654  |
